# Supplementary material
Source: publisher figshare collection journal article supplement (https://gsajournals.figshare.com/ndownloader/files/27462725)
Supplement: Supplementary file 1 [file 27462725]

## Sheet: All_vs_ALL_upset_Bact_genus
ID	OurStudyALSblood	Linsley2014	Gagliardi2018	Brohawn2016	Ladd2017	Brohawn2019	Emanuel2020	Shin2014	Humphrys2016	VonSchack2018
Abiotrophia	1	0	0	0	1	0	0	0	0	0
Acaryochloris	1	0	0	0	0	0	0	0	0	0
Acetobacter	1	0	1	0	0	0	0	0	0	0
Achromobacter	1	1	1	1	1	1	0	1	0	0
Acidaminococcus	1	0	1	0	1	1	0	0	0	0
Acidibrevibacterium	1	0	0	0	0	0	0	1	0	0
Acidihalobacter	1	0	0	0	0	0	0	0	0	0
Acidimicrobium	1	0	0	0	0	0	0	0	0	0
Acidiphilium	1	0	0	0	0	0	0	0	0	0
Acidipropionibacterium	1	0	0	0	0	0	0	1	0	0
Acidisarcina	1	0	0	0	0	0	0	0	0	0
Acidithiobacillus	1	1	0	0	0	0	0	0	0	0
Acidithiomicrobium	1	0	0	0	1	0	0	0	0	0
Acidothermus	1	0	0	0	0	0	0	0	0	0
Acidovorax	1	1	1	1	1	1	0	1	0	1
Acinetobacter	1	1	1	1	1	1	1	1	0	1
Actinobacillus	1	0	1	0	1	1	0	1	0	0
Actinobaculum	1	0	0	0	1	0	0	0	0	0
Actinocorallia	1	0	0	0	0	0	0	0	0	0
Actinomyces	1	1	1	1	1	1	1	1	0	1
Actinoplanes	1	0	1	1	1	0	0	0	0	0
Actinopolymorpha	1	0	1	0	0	0	0	0	0	0
Actinosynnema	1	0	1	0	0	0	0	1	0	0
Actinotignum	1	0	0	0	0	0	0	0	0	0
Aequorivita	1	0	0	0	0	0	0	0	0	0
Aeribacillus	1	0	1	0	0	0	0	0	0	1
Aerococcus	1	0	1	0	1	1	0	1	0	0
Aeromicrobium	1	0	1	0	1	0	0	1	0	1
Aeromonas	1	0	1	0	1	1	0	1	0	0
Aerosticca	1	0	0	0	0	0	0	0	0	0
Agarilytica	1	0	0	0	0	0	0	0	0	0
Agarivorans	1	0	0	0	0	0	0	0	0	0
Aggregatibacter	1	1	0	0	1	1	0	0	0	0
Aggregicoccus	1	0	0	0	0	0	0	0	0	0
Agreia	1	0	0	0	0	0	0	0	0	0
Agrobacterium	1	1	1	1	1	1	1	1	0	0
Agrococcus	1	1	1	0	0	0	0	1	0	1
Agromyces	1	0	1	0	1	0	0	1	0	0
Akkermansia	1	0	1	1	1	1	0	0	0	0
Alcaligenes	1	0	0	0	1	0	0	0	0	0
Algibacter	1	0	0	0	1	0	0	0	0	0
Algoriphagus	1	0	0	0	1	0	0	0	0	0
Alicycliphilus	1	0	1	0	1	0	0	1	0	0
Alicyclobacillus	1	1	1	0	0	0	0	0	0	0
Aliiglaciecola	1	0	0	0	0	0	0	0	0	0
Alishewanella	1	0	0	0	1	0	0	0	0	0
Alistipes	1	0	0	1	1	1	0	0	0	0
Alkalilimnicola	1	0	1	0	0	0	0	0	0	0
Alkaliphilus	1	0	0	0	1	0	0	0	0	0
Alkalitalea	1	0	0	0	1	0	0	0	0	0
Alkanindiges	1	0	0	0	0	0	0	0	0	0
Alloactinosynnema	1	0	1	0	0	0	0	0	0	0
Alloprevotella	1	0	0	0	0	1	0	0	0	0
Allopseudarcicella	1	1	0	0	1	1	0	0	0	0
Altererythrobacter	1	0	1	0	1	0	0	0	0	1
Alteromonas	1	0	1	0	1	0	0	0	0	0
Amaricoccus	1	0	0	0	0	0	0	0	0	0
Aminipila	1	0	0	0	1	0	0	0	0	0
Aminobacterium	1	0	0	0	0	0	0	0	0	0
Amphibacillus	1	0	0	0	0	0	0	0	0	0
Amycolatopsis	1	0	1	0	1	0	1	1	0	0
Anabaena	1	1	0	0	1	0	0	0	0	0
Anaerobutyricum	1	0	1	0	1	1	0	0	0	0
Anaerococcus	1	1	1	1	1	1	1	1	0	0
Anaeroglobus	1	0	0	0	0	0	0	0	0	0
Anaerohalosphaera	1	0	0	0	0	0	0	0	0	0
Anaeromyxobacter	1	0	1	0	1	1	0	0	0	0
Anaerostipes	1	0	1	0	1	1	0	0	0	0
Anaerotignum	1	0	0	1	0	0	0	0	0	0
Anaerotruncus	1	0	0	0	0	0	0	0	0	0
Aneurinibacillus	1	0	0	0	1	0	0	0	0	0
Anoxybacillus	1	1	1	0	1	0	0	0	0	1
Antarcticibacterium	1	0	0	0	0	0	0	0	0	0
Aphanizomenon	1	0	0	0	0	0	0	0	0	0
Aquabacterium	1	1	1	0	1	1	0	0	0	1
Aquaspirillum	1	0	1	0	0	0	0	0	0	0
Aquiflexum	1	0	0	0	1	0	0	0	0	0
Aquincola	1	0	1	0	0	0	1	0	0	0
Aquitalea	1	0	0	0	1	0	0	0	0	1
Arachidicoccus	1	0	1	0	1	0	0	0	0	0
Arcanobacterium	1	0	0	0	1	0	0	0	0	0
Archangium	1	0	0	0	0	0	0	0	0	0
Arcobacter	1	0	0	0	1	1	0	0	0	0
Arcticibacterium	1	0	0	0	0	0	0	0	0	0
Arsenicicoccus	1	0	0	0	1	1	0	0	0	0
Arthrobacter	1	1	1	0	1	1	1	1	0	1
Asaia	1	0	0	0	1	0	0	0	0	0
Atopobium	1	0	0	1	1	1	0	0	0	0
Aurantimicrobium	1	0	0	0	1	0	0	0	0	0
Auraticoccus	1	0	1	0	0	0	0	0	0	0
Aureimonas	1	0	1	0	1	0	0	1	0	0
Auricoccus	1	0	0	0	1	1	0	0	0	0
Auritidibacter	1	1	0	0	0	0	0	0	0	0
Austwickia	1	1	0	0	0	0	0	0	0	0
Azoarcus	1	0	1	0	1	0	0	0	0	0
Azospira	1	0	1	0	0	0	0	0	0	0
Azospirillum	1	0	1	1	1	1	0	1	0	0
Azotobacter	1	0	1	1	0	1	0	1	0	0
Bacillus	1	1	1	1	1	1	1	1	0	1
Bacteriovorax	1	0	0	0	1	0	0	0	0	0
Bacteroides	1	0	1	1	1	1	0	0	0	0
Baekduia	1	0	1	0	1	1	0	0	0	0
Barnesiella	1	0	1	0	1	0	0	0	0	0
Bartonella	1	0	0	0	1	0	0	0	0	0
Bdellovibrio	1	1	1	1	1	1	0	0	0	0
Beggiatoa	1	0	0	0	0	0	0	0	0	0
Bernardetia	1	0	0	0	1	0	0	0	0	0
Bibersteinia	1	0	0	0	0	0	0	0	0	0
Bifidobacterium	1	1	1	1	1	1	0	1	0	0
Blastochloris	1	0	0	1	0	0	0	0	0	0
Blastococcus	1	0	1	0	1	0	0	0	0	1
Blattabacterium	1	0	0	0	1	0	1	0	0	0
Blautia	1	1	1	0	1	1	0	1	0	1
Bordetella	1	0	1	0	1	0	0	1	0	0
Bosea	1	0	1	0	1	0	0	1	0	0
Brachybacterium	1	1	1	0	1	0	0	1	0	1
Brachyspira	1	0	0	0	1	0	0	0	0	0
Bradyrhizobium	1	1	1	1	1	1	0	1	0	0
Bremerella	1	0	0	0	0	0	0	0	0	0
Brevibacillus	1	0	1	0	1	0	0	1	0	0
Brevibacterium	1	1	1	0	1	0	0	1	0	0
Brevundimonas	1	1	1	1	1	1	1	1	0	1
Brochothrix	1	1	1	0	1	0	0	0	0	0
Buchnera	1	0	1	0	1	0	0	0	0	0
Burkholderia	1	1	1	1	1	1	0	1	0	0
Butyrivibrio	1	0	0	1	1	1	0	0	0	0
Caedimonas	1	0	0	0	0	0	0	0	0	0
Caldicellulosiruptor	1	0	0	0	1	0	0	0	0	0
Caldilinea	1	0	0	0	0	0	0	0	0	0
Caldimicrobium	1	0	0	0	0	0	0	0	0	0
Caldisericum	1	0	0	0	1	0	0	0	0	0
Caldithrix	1	0	0	0	0	0	0	0	0	0
Caloramator	1	0	1	0	1	0	0	0	0	0
Calothrix	1	0	0	0	1	0	0	0	0	0
Caminibacter	1	0	0	0	0	0	0	0	0	0
Campylobacter	1	0	1	1	1	1	0	0	0	1
Candidatus Aquiluna	1	0	0	0	1	0	0	0	0	0
Candidatus Azobacteroides	1	0	0	0	0	0	0	0	0	0
Candidatus Blochmannia	1	0	0	0	1	0	0	0	0	0
Candidatus Fokinia	1	0	0	0	0	0	0	0	0	0
Candidatus Fukatsuia	1	0	0	0	0	0	0	0	0	0
Candidatus Methylopumilus	1	0	1	0	1	0	0	0	0	0
Candidatus Nitrotoga	1	0	1	0	0	0	0	0	0	0
Candidatus Paracaedimonas	1	0	1	0	0	0	0	0	0	0
Candidatus Peribacter	1	0	0	0	1	0	0	0	0	0
Candidatus Phycorickettsia	1	0	0	0	1	0	0	0	0	0
Candidatus Phytoplasma	1	0	0	0	1	0	0	0	0	0
Candidatus Planktophila	1	0	0	1	1	1	0	0	0	0
Candidatus Protochlamydia	1	0	0	0	0	0	0	0	0	0
Candidatus Purcelliella	1	0	0	0	0	0	0	0	0	0
Candidatus Solibacter	1	0	1	0	0	0	0	0	0	0
Candidatus Tenderia	1	0	1	0	0	0	0	0	0	0
Capnocytophaga	1	1	1	1	1	1	0	0	0	1
Carboxydocella	1	0	0	0	0	0	0	0	0	0
Cardiobacterium	1	0	1	0	1	0	0	0	0	0
Carnobacterium	1	1	1	1	1	1	0	0	0	0
Castellaniella	1	0	0	0	0	0	0	0	0	0
Catenulispora	1	0	0	0	0	0	0	1	0	0
Catonella	1	0	0	0	0	0	0	0	0	0
Caulobacter	1	1	1	1	1	1	0	1	0	1
Celeribacter	1	0	0	0	0	1	0	0	0	0
Cellulomonas	1	0	1	1	1	0	0	1	0	0
Cellulophaga	1	0	0	0	1	0	0	0	0	0
Cellulosimicrobium	1	0	0	0	0	0	0	1	0	0
Cellvibrio	1	0	0	0	1	0	0	0	0	0
Chamaesiphon	1	0	0	0	0	0	0	0	0	0
Chelatococcus	1	0	1	0	0	0	0	1	0	1
Chitinophaga	1	0	1	0	1	1	0	0	0	0
Chloracidobacterium	1	0	0	0	1	0	0	0	0	0
Chloroflexus	1	0	0	0	1	0	0	0	0	0
Chondrocystis	1	0	0	0	1	0	0	0	0	0
Chondromyces	1	0	0	1	1	1	0	0	0	0
Chromatocurvus	1	0	0	0	0	0	0	0	0	0
Chromobacterium	1	0	1	0	1	0	0	0	0	1
Chroococcidiopsis	1	0	1	1	1	1	0	0	0	0
Chryseobacterium	1	1	1	0	1	1	1	1	0	1
Chryseolinea	1	0	1	0	1	0	0	0	0	0
Chthoniobacter	1	0	1	0	1	0	0	0	0	0
Chthonomonas	1	0	0	0	0	0	0	0	0	0
Ciceribacter	1	0	0	0	0	0	0	0	0	0
Citricoccus	1	0	1	0	1	0	0	1	0	0
Citrobacter	1	0	1	0	1	0	0	0	0	0
Cloacibacillus	1	0	0	0	0	0	0	0	0	0
Cloacibacterium	1	1	1	1	1	1	0	1	0	1
Clostridioides	1	0	1	0	0	0	0	0	0	0
Clostridium	1	1	1	1	1	1	0	1	0	0
Cobetia	1	0	1	0	0	0	0	0	0	0
Coelomoron	1	0	0	0	0	0	0	0	0	0
Coelosphaerium	1	0	0	0	0	0	0	0	0	0
Cohnella	1	0	0	0	1	0	0	0	0	0
Collimonas	1	0	1	1	1	0	1	0	0	0
Collinsella	1	0	0	0	0	1	0	0	0	0
Comamonas	1	1	1	1	1	1	0	1	0	1
Conchiformibius	1	0	0	0	1	0	0	0	0	0
Conexibacter	1	0	1	1	1	0	0	0	0	0
Congregibacter	1	0	0	0	0	0	0	0	0	0
Coprococcus	1	0	0	0	1	1	0	0	0	1
Corallococcus	1	0	1	0	1	0	0	0	0	0
Coriobacterium	1	1	0	0	0	0	0	0	0	0
Corynebacterium	1	1	1	1	1	1	1	1	0	1
Crateriforma	1	0	0	0	0	0	0	0	0	0
Craurococcus	1	0	0	0	0	0	0	0	0	0
Criblamydia	1	0	0	0	0	0	0	0	0	0
Croceicoccus	1	0	1	0	0	0	0	0	0	1
Cronobacter	1	0	0	0	1	0	0	0	0	0
Cryobacterium	1	0	0	0	1	0	0	1	0	0
Cryptobacterium	1	0	0	0	0	0	0	0	0	0
Cupriavidus	1	1	1	0	1	1	1	1	0	1
Curtobacterium	1	0	1	1	1	1	1	1	0	0
Curvibacter	1	0	1	0	1	0	0	0	0	0
Cutibacterium	1	1	1	1	1	1	1	1	0	1
Cyanobacterium	1	0	0	0	1	0	0	0	0	0
Cyanocystis	1	0	0	0	0	0	0	0	0	0
Cycloclasticus	1	0	0	0	0	0	0	0	0	0
Cylindrospermopsis	1	0	0	0	0	0	0	0	0	0
Cystobacter	1	0	1	0	1	0	0	0	0	0
Cytophaga	1	0	0	0	1	0	0	0	0	0
Dechloromonas	1	0	1	0	1	0	0	0	0	0
Dechlorospirillum	1	0	0	0	0	0	0	0	0	0
Dehalococcoides	1	0	0	0	1	0	0	0	0	0
Deinococcus	1	0	1	1	1	1	0	1	0	0
Delftia	1	0	1	0	1	0	1	1	0	0
Denitratisoma	1	0	1	0	1	0	0	0	0	0
Dermabacter	1	0	0	0	1	0	0	1	0	0
Dermacoccus	1	1	0	0	1	1	1	1	0	0
Desulfarculus	1	0	0	0	0	0	0	0	0	0
Desulfitobacterium	1	0	0	0	0	0	0	0	0	0
Desulfobacter	1	0	0	0	0	0	0	0	0	0
Desulfobacterium	1	0	0	0	1	0	0	0	0	0
Desulfocapsa	1	0	0	0	0	0	0	0	0	0
Desulfococcus	1	0	0	0	1	0	0	0	0	0
Desulfoglaeba	1	0	0	0	0	0	0	0	0	0
Desulfohalobium	1	0	0	0	0	0	0	0	0	0
Desulfotomaculum	1	0	1	0	1	0	0	0	0	0
Desulfovibrio	1	0	1	0	1	0	0	0	0	0
Desulfuromonas	1	0	0	0	1	0	0	0	0	0
Devosia	1	0	1	0	1	1	0	0	0	0
Dialister	1	0	0	1	1	0	0	0	0	0
Diaphorobacter	1	1	1	1	1	1	0	1	0	1
Dictyoglomus	1	0	0	0	1	0	0	0	0	0
Dietzia	1	0	1	1	1	0	0	1	0	0
Dinoroseobacter	1	0	0	1	0	1	0	0	0	0
Dokdonella	1	0	0	0	0	0	0	0	0	0
Dolosigranulum	1	1	1	1	1	1	0	1	0	0
Draconibacterium	1	0	0	0	0	0	0	0	0	0
Duganella	1	0	0	0	0	0	1	0	0	0
Duncaniella	1	1	0	0	1	0	0	0	0	0
Dyadobacter	1	0	1	0	1	1	1	0	0	0
Dyella	1	0	1	0	1	0	0	1	0	0
Dysosmobacter	1	0	0	1	0	1	0	0	0	0
Echinicola	1	0	0	0	0	0	0	0	0	0
Eggerthella	1	0	0	1	1	0	0	0	0	0
Egicoccus	1	0	0	0	0	0	0	0	0	0
Ehrlichia	1	0	0	0	1	0	0	0	0	0
Eikenella	1	0	1	0	1	0	0	0	0	1
Elizabethkingia	1	1	1	0	1	1	0	0	0	0
Emticicia	1	0	0	0	1	0	0	0	0	0
Endomicrobium	1	0	0	0	0	0	0	0	0	0
Ensifer	1	1	0	0	0	0	0	0	0	0
Enterobacter	1	1	1	0	1	0	1	1	0	1
Enterococcus	1	0	1	1	1	1	0	1	0	1
Erysipelatoclostridium	1	0	0	1	1	1	0	0	0	0
Erythrobacter	1	0	1	0	1	0	1	1	0	0
Escherichia	1	1	1	1	1	1	1	1	1	1
Estrella	1	0	1	0	1	0	0	0	0	0
Ethanoligenens	1	0	0	0	1	1	0	0	0	0
Exiguobacterium	1	0	1	0	1	0	0	0	0	0
Extensimonas	1	0	0	0	0	0	0	0	0	0
Ezakiella	1	0	1	1	1	1	0	0	0	0
Fabibacter	1	0	0	0	1	0	0	0	0	0
Facklamia	1	0	0	0	0	0	0	0	0	0
Faecalibacterium	1	0	1	0	1	1	0	0	0	0
Faecalitalea	1	0	0	0	0	1	0	0	0	0
Fastidiosipila	1	0	0	1	0	0	0	0	0	0
Fermentimonas	1	0	0	0	1	0	0	0	0	0
Ferrovibrio	1	0	0	0	1	0	0	0	0	0
Fervidicella	1	0	0	0	0	0	0	0	0	0
Fibrella	1	0	1	0	1	0	0	0	0	0
Fictibacillus	1	0	0	0	0	0	0	0	0	0
Filifactor	1	0	0	0	1	0	0	0	0	0
Filimonas	1	0	1	0	1	0	0	0	0	0
Filomicrobium	1	0	0	0	0	0	0	0	0	1
Fimbriimonas	1	0	0	0	0	0	0	0	0	0
Finegoldia	1	0	1	1	1	1	0	1	0	0
Flaviflexus	1	0	0	1	0	0	0	1	0	0
Flavisolibacter	1	0	1	1	1	1	0	0	0	0
Flavobacterium	1	1	1	1	1	1	1	1	0	1
Flavonifractor	1	0	1	0	0	1	0	0	0	0
Flexibacter	1	0	0	0	1	0	0	0	0	0
Fluviicola	1	0	1	0	1	0	0	0	0	0
Francisella	1	0	0	0	1	0	0	0	0	0
Frankia	1	0	1	1	1	1	0	0	0	0
Frateuria	1	0	0	0	0	0	0	0	0	0
Friedmanniella	1	1	1	1	1	1	1	0	0	0
Frigoribacterium	1	0	1	0	0	0	0	1	0	0
Frondihabitans	1	0	1	1	0	1	0	1	0	0
Fuerstia	1	0	0	0	0	0	0	0	0	0
Fusobacterium	1	0	1	1	1	1	0	0	0	1
Gardnerella	1	1	1	0	1	0	0	0	0	0
Geitlerinema	1	0	1	0	1	0	0	0	0	0
Gemella	1	1	1	1	1	1	1	0	0	0
Gemmata	1	0	1	0	1	1	0	0	0	1
Gemmatimonas	1	0	0	0	1	0	0	0	0	0
Gemmatirosa	1	0	0	0	1	0	0	0	0	0
Geobacillus	1	0	0	1	1	1	0	1	0	1
Geobacter	1	0	1	0	1	0	0	0	0	0
Geodermatophilus	1	0	1	0	0	0	0	1	0	1
Georgenia	1	0	0	0	0	0	0	1	0	0
Georhizobium	1	0	1	0	0	0	0	0	0	0
Geothrix	1	0	0	0	0	0	0	0	0	0
Gillisia	1	0	0	0	0	0	0	0	0	0
Glaciecola	1	0	0	0	1	1	0	0	0	0
Gloeocapsa	1	0	0	0	1	0	0	0	0	0
Gluconacetobacter	1	0	1	0	0	0	0	0	0	0
Glutamicibacter	1	0	0	0	1	0	0	1	0	1
Gordonia	1	0	1	0	1	1	1	1	0	0
Gordonibacter	1	0	0	0	0	0	0	1	0	0
Granulibacter	1	0	1	1	0	0	0	1	0	0
Granulicatella	1	0	1	1	1	1	0	0	0	0
Granulicella	1	0	0	0	0	1	0	1	0	0
Haematobacter	1	0	1	0	0	0	0	0	0	0
Haematospirillum	1	0	0	0	0	0	0	0	0	0
Haemophilus	1	1	1	1	1	1	1	1	0	1
Hafnia	1	0	1	0	1	0	0	0	0	0
Hahella	1	0	0	0	0	0	0	1	0	0
Haliangium	1	0	1	0	1	0	0	0	0	0
Haliscomenobacter	1	0	0	0	1	0	0	0	0	0
Haloactinobacterium	1	0	0	0	0	0	0	0	0	0
Halobacteriovorax	1	0	0	0	0	0	0	0	0	0
Halomicronema	1	0	0	0	0	0	0	0	0	0
Halomonas	1	0	1	0	1	0	1	1	0	0
Halotalea	1	0	0	0	0	0	0	0	0	0
Halothiobacillus	1	0	0	0	1	0	0	0	0	0
Hartmannibacter	1	0	1	0	0	0	0	0	0	0
Hassallia	1	0	0	0	0	1	0	0	0	0
Hathewaya	1	0	0	0	0	0	0	0	0	1
Herbaspirillum	1	1	1	0	1	1	0	0	0	0
Herminiimonas	1	0	0	0	1	0	0	0	0	0
Herpetosiphon	1	0	0	0	0	0	0	0	0	0
Holophaga	1	0	0	0	0	0	0	0	0	0
Humibacter	1	1	1	0	0	1	0	1	0	1
Hungateiclostridium	1	0	1	0	0	0	0	0	0	0
Hungatella	1	0	0	1	1	1	0	0	0	0
Hydrogenophaga	1	1	1	1	1	1	0	1	0	1
Hydrogenophilus	1	0	1	0	1	0	0	1	0	0
Hylemonella	1	1	1	0	1	1	0	0	0	0
Hymenobacter	1	1	1	1	1	1	1	0	0	1
Hyphomicrobium	1	0	1	0	1	0	0	0	0	0
Ilumatobacter	1	0	1	0	1	0	0	0	0	0
Inhella	1	0	1	0	0	0	0	0	0	0
Intestinibaculum	1	0	0	0	0	0	0	0	0	0
Intrasporangium	1	0	1	0	1	0	0	0	0	0
Isoptericola	1	0	0	0	0	0	0	1	0	0
Isosphaera	1	0	0	0	1	0	0	0	0	0
Janibacter	1	0	1	0	1	1	0	0	0	0
Jannaschia	1	0	0	0	0	0	0	0	0	0
Janthinobacterium	1	1	1	1	1	1	1	0	0	0
Jatrophihabitans	1	0	0	1	0	0	0	0	0	0
Jeotgalibaca	1	1	0	0	1	0	1	0	0	0
Jeotgalicoccus	1	0	0	0	0	0	0	0	0	0
Jiangella	1	0	0	0	1	1	0	0	0	0
Jonquetella	1	0	0	0	0	0	0	0	0	0
Ketobacter	1	0	0	0	1	0	0	0	0	0
Ketogulonicigenium	1	0	0	0	1	0	0	0	0	1
Kibdelosporangium	1	0	0	1	0	1	0	0	0	0
Kinneretia	1	0	0	0	0	0	0	0	0	0
Kiritimatiella	1	0	0	0	0	0	0	0	0	0
Kitasatospora	1	0	0	0	0	0	0	1	0	0
Klebsiella	1	1	1	1	1	1	1	1	0	1
Knoellia	1	0	0	0	0	0	0	0	0	0
Kocuria	1	1	1	0	1	1	1	1	0	0
Kosakonia	1	0	0	0	1	0	0	0	0	0
Kozakia	1	0	0	0	0	0	0	0	0	0
Kribbella	1	0	0	0	1	0	0	0	0	0
Kurthia	1	0	1	0	1	0	0	0	0	0
Kushneria	1	0	0	0	1	0	0	0	0	0
Kytococcus	1	0	1	0	1	0	0	1	0	0
Labedella	1	0	0	0	0	0	0	0	0	0
Labilibaculum	1	0	0	0	1	0	0	0	0	0
Labilithrix	1	0	0	0	1	1	0	0	0	0
Labrenzia	1	0	1	1	1	1	0	0	0	0
Lachnoanaerobaculum	1	0	1	1	1	1	0	0	0	1
Lachnoclostridium	1	0	1	1	1	1	0	0	0	0
Lachnospira	1	0	0	0	1	1	0	0	0	0
Lacihabitans	1	0	0	0	1	0	0	0	0	0
Lacrimispora	1	0	0	1	0	1	0	0	0	0
Lactobacillus	1	1	1	1	1	1	1	1	0	1
Lactococcus	1	1	1	1	1	1	1	0	0	1
Lacunisphaera	1	0	0	0	0	0	0	0	0	0
Lautropia	1	0	1	0	1	1	1	0	0	0
Lawsonella	1	1	1	1	1	1	1	1	0	1
Leadbetterella	1	0	0	0	1	0	0	0	0	0
Leclercia	1	0	1	0	1	0	0	1	0	0
Legionella	1	0	0	0	1	1	0	0	0	0
Leifsonia	1	0	1	0	1	0	0	1	0	0
Leisingera	1	0	0	0	0	0	0	0	0	0
Lelliottia	1	0	0	0	0	0	0	0	0	0
Leptolyngbya	1	0	0	0	1	1	0	0	0	0
Leptothrix	1	0	1	0	0	0	0	0	0	0
Leptotrichia	1	1	1	1	1	1	0	0	0	1
Leucobacter	1	0	0	0	0	0	0	1	0	0
Leuconostoc	1	0	1	0	1	0	0	0	0	0
Leucothrix	1	0	0	0	0	0	0	0	0	0
Limihaloglobus	1	0	0	0	0	0	0	0	0	0
Limnochorda	1	0	0	0	0	0	0	0	0	0
Limnohabitans	1	1	1	0	1	0	0	0	0	0
Litoreibacter	1	0	0	0	0	0	0	0	0	0
Litorilituus	1	0	0	0	1	0	0	0	0	0
Loktanella	1	0	0	0	0	0	0	0	0	0
Longibaculum	1	0	0	0	0	1	0	0	0	0
Luteibacter	1	0	1	0	1	0	0	0	0	0
Luteimonas	1	0	1	0	1	0	0	0	0	0
Luteitalea	1	0	0	0	1	0	0	0	0	0
Lutibacter	1	0	0	0	0	0	0	0	0	0
Lysinibacillus	1	0	0	0	0	1	0	1	0	0
Lysobacter	1	1	1	1	1	0	0	1	0	0
Macrococcus	1	0	0	0	0	1	0	0	0	0
Mageeibacillus	1	0	0	0	0	0	0	0	0	0
Magnetococcus	1	0	0	0	1	0	0	0	0	0
Magnetospirillum	1	0	0	0	1	0	0	1	0	0
Mannheimia	1	0	1	0	1	0	0	0	0	0
Maribacter	1	0	1	0	1	0	0	1	0	0
Marichromatium	1	0	1	0	1	0	0	0	0	0
Marinilactibacillus	1	0	1	0	0	0	0	0	0	0
Marinomonas	1	0	0	0	0	0	0	0	0	0
Maritalea	1	0	0	0	0	0	0	0	0	0
Marivirga	1	0	0	0	0	0	0	0	0	0
Marmoricola	1	1	1	0	1	0	1	0	0	1
Massilia	1	1	1	1	1	1	1	1	0	1
Megamonas	1	1	0	0	1	1	0	0	0	0
Megasphaera	1	0	0	1	1	1	0	0	0	0
Meiothermus	1	1	0	0	0	0	0	0	0	0
Melaminivora	1	0	1	0	1	1	0	0	0	0
Melissococcus	1	0	0	0	0	0	0	0	0	0
Mesorhizobium	1	1	1	1	1	1	0	1	0	0
Methylacidiphilum	1	0	0	0	0	0	0	0	0	0
Methylibium	1	0	1	0	1	0	0	1	0	0
Methylobacterium	1	1	1	1	1	1	1	1	0	1
Methyloceanibacter	1	0	0	0	0	0	0	0	0	0
Methylocella	1	0	1	1	0	0	0	0	0	0
Methylocystis	1	0	1	0	1	0	0	1	0	0
Methylomusa	1	0	0	0	1	0	0	0	0	0
Methylophaga	1	0	0	0	1	0	0	0	0	0
Methylophilus	1	0	0	0	1	0	0	0	0	0
Methylorubrum	1	1	1	1	1	1	0	1	0	1
Methylotenera	1	0	1	0	1	0	0	0	0	0
Methyloversatilis	1	1	1	0	1	0	0	0	0	0
Microbacterium	1	1	1	1	1	1	0	1	0	1
Microcella	1	0	0	0	0	0	0	1	0	0
Microchaete	1	0	0	0	1	0	0	0	0	0
Micrococcus	1	1	1	1	1	1	1	1	0	0
Microcoleus	1	0	1	0	0	1	0	0	0	0
Microcystis	1	0	0	0	1	0	0	0	0	0
Microlunatus	1	0	1	0	1	1	1	1	0	0
Micromonospora	1	0	1	0	1	0	0	1	0	0
Microterricola	1	0	0	0	0	0	0	1	0	0
Microvirga	1	0	1	0	1	1	0	0	0	0
Microvirgula	1	0	0	0	0	0	0	0	0	0
Minicystis	1	1	0	0	1	1	0	0	0	0
Miniimonas	1	0	0	0	1	0	0	1	0	1
Mitsuaria	1	0	1	0	0	0	1	0	0	0
Mixta	1	0	1	0	1	0	0	0	0	0
Mobiluncus	1	0	0	0	0	0	0	0	0	0
Modestobacter	1	0	1	0	0	0	0	1	0	1
Mogibacterium	1	0	1	1	1	1	0	0	0	0
Moraxella	1	1	1	1	1	1	1	1	0	1
Morganella	1	0	1	0	0	0	0	0	0	0
Morococcus	1	0	0	0	0	0	0	0	0	0
Mucilaginibacter	1	0	1	0	1	1	0	0	0	0
Murdochiella	1	0	0	0	1	1	0	0	0	0
Muribaculum	1	0	1	0	0	0	0	0	0	0
Muricauda	1	0	0	0	1	0	0	0	0	0
Mycobacterium	1	1	1	0	1	1	0	1	0	0
Mycobacteroides	1	1	0	1	1	1	0	1	0	0
Mycolicibacter	1	0	0	0	1	0	0	0	0	0
Mycolicibacterium	1	0	1	0	1	0	0	1	0	0
Mycoplasma	1	0	1	0	1	0	0	0	1	0
Myroides	1	0	0	0	1	0	0	0	0	0
Myxococcus	1	0	1	0	1	0	0	1	0	0
Nakamurella	1	0	0	1	0	0	1	1	0	0
Nannocystis	1	0	0	0	1	0	0	0	0	0
Natranaerobius	1	0	0	0	0	0	0	0	0	0
Neisseria	1	1	1	1	1	1	1	1	0	1
Neochlamydia	1	0	1	1	1	1	0	0	0	0
Neomicrococcus	1	0	0	0	0	0	0	0	0	0
Neorhizobium	1	1	1	0	1	0	0	0	0	0
Neorickettsia	1	0	0	0	0	0	0	0	0	0
Nesterenkonia	1	0	1	0	0	0	0	0	0	0
Nevskia	1	0	1	0	1	0	0	0	0	0
Niabella	1	0	0	0	1	0	0	0	0	0
Niastella	1	0	0	1	1	1	0	0	0	0
Nibricoccus	1	1	0	0	1	0	0	0	0	0
Nitratireductor	1	0	0	0	1	0	0	0	0	1
Nitrolancea	1	0	0	0	0	0	0	0	0	0
Nitrospira	1	0	1	0	1	0	0	0	0	0
Nitrospirillum	1	0	1	0	0	0	0	0	0	0
Niveispirillum	1	0	1	0	0	0	0	0	0	0
Nocardia	1	0	1	0	1	0	0	1	0	0
Nocardioides	1	1	1	1	1	1	1	1	0	1
Nocardiopsis	1	0	0	0	1	0	0	1	0	0
Nonlabens	1	0	0	0	1	0	0	0	0	0
Nostoc	1	1	1	0	1	1	0	0	0	0
Novibacillus	1	0	0	0	0	0	0	0	0	0
Noviherbaspirillum	1	0	1	1	1	0	0	1	0	0
Novosphingobium	1	0	1	1	1	1	1	1	0	0
Oceanicola	1	0	0	0	1	0	0	0	0	0
Ochrobactrum	1	0	1	0	1	1	1	0	0	0
Odoribacter	1	0	0	0	0	0	0	0	0	0
Oenococcus	1	0	0	0	1	0	0	0	0	0
Oerskovia	1	0	1	0	1	0	0	0	0	0
Oligella	1	0	0	0	0	0	0	0	0	0
Oligotropha	1	1	0	0	0	0	0	0	0	0
Olleya	1	0	0	0	0	0	0	0	0	0
Olsenella	1	0	1	0	0	0	0	0	0	0
Opitutus	1	0	0	0	1	1	0	0	0	0
Ornithinibacillus	1	0	0	0	0	0	0	0	0	0
Ornithinimicrobium	1	0	1	0	1	0	0	1	0	1
Ornithobacterium	1	0	0	0	0	0	0	0	0	0
Oscillatoria	1	0	1	0	1	0	0	0	0	0
Oscillibacter	1	0	1	0	1	0	0	0	0	0
Ottowia	1	0	1	0	1	1	0	0	0	0
Paenarthrobacter	1	0	0	0	0	0	0	0	0	0
Paenibacillus	1	0	1	0	1	1	1	1	0	0
Paeniclostridium	1	0	0	1	0	1	0	0	0	0
Pajaroellobacter	1	0	0	0	0	0	0	0	0	0
Paludibacter	1	0	0	0	1	0	0	0	0	0
Paludibacterium	1	0	0	0	0	0	0	0	0	0
Paludisphaera	1	0	1	0	1	1	0	1	0	0
Panacibacter	1	0	1	0	1	1	0	0	0	0
Pandoraea	1	1	1	0	1	1	0	1	0	0
Pantoea	1	0	1	0	1	0	1	1	1	0
Parabacteroides	1	0	0	1	1	1	0	0	0	0
Paraburkholderia	1	1	1	0	1	0	0	1	0	0
Parachlamydia	1	0	1	0	0	0	0	0	0	0
Paracoccus	1	1	1	1	1	1	1	1	0	1
Paracraurococcus	1	0	0	1	0	0	0	0	0	0
Paraflavitalea	1	0	0	0	1	1	0	0	0	0
Paraprevotella	1	0	0	1	0	1	0	0	0	0
Pararheinheimera	1	0	1	0	0	0	0	1	0	0
Pararhizobium	1	0	0	0	0	0	0	0	0	0
Parashewanella	1	0	0	0	1	0	0	0	0	0
Parolsenella	1	0	0	0	0	0	0	0	0	0
Parvimonas	1	0	0	1	1	1	0	0	0	0
Pasteurella	1	1	1	0	1	0	0	1	0	0
Patulibacter	1	0	0	0	0	0	0	0	0	0
Paucibacter	1	0	1	0	1	0	0	0	0	0
Paucimonas	1	0	1	0	0	0	0	0	0	0
Pectobacterium	1	0	1	0	1	0	0	1	0	0
Pediococcus	1	0	0	0	1	0	0	0	0	1
Pedobacter	1	0	1	0	1	1	0	0	0	0
Pedosphaera	1	0	0	0	1	1	0	0	0	0
Pelagibacterium	1	0	0	0	0	0	0	0	0	0
Pelobacter	1	0	0	0	1	0	0	0	0	0
Pelolinea	1	0	0	0	1	0	0	0	0	0
Pelosinus	1	0	0	0	0	0	0	0	0	0
Peptococcus	1	0	1	0	1	1	0	0	0	0
Peptoniphilus	1	0	1	1	1	1	0	0	0	0
Peptostreptococcus	1	0	0	0	0	0	0	0	0	0
Petrimonas	1	0	0	0	1	0	0	0	0	0
Petrocella	1	0	0	0	0	0	0	0	0	0
Phenylobacterium	1	1	0	0	1	0	1	1	0	0
Phoenicibacter	1	0	0	0	0	0	0	0	0	0
Phreatobacter	1	0	1	0	1	0	0	1	0	0
Phycicoccus	1	0	1	0	1	0	0	1	0	0
Phycisphaera	1	0	0	0	1	0	0	1	0	0
Phyllobacterium	1	0	1	0	1	0	0	0	0	0
Pirellula	1	0	0	0	1	0	0	0	0	0
Planctomyces	1	0	1	1	1	1	0	0	0	0
Planctopirus	1	0	0	0	1	0	0	0	0	0
Planococcus	1	0	1	0	1	0	0	1	0	0
Planomicrobium	1	0	0	0	1	0	0	0	0	0
Plantibacter	1	0	1	0	0	0	0	1	0	0
Pleomorphomonas	1	0	0	0	1	0	0	0	0	0
Polaribacter	1	0	1	0	1	0	0	0	0	0
Polaromonas	1	0	1	0	1	1	0	0	0	1
Polynucleobacter	1	0	1	0	1	0	0	1	0	0
Pontibacter	1	0	1	0	1	0	0	0	0	0
Pontimonas	1	0	0	0	0	0	0	0	0	0
Porphyrobacter	1	0	1	1	0	0	0	0	0	0
Porphyromonas	1	0	1	1	1	1	1	0	0	0
Prevotella	1	1	1	1	1	1	1	1	0	1
Promicromonospora	1	0	0	0	0	0	0	0	0	0
Propionibacterium	1	1	1	0	1	1	1	1	0	1
Propionimicrobium	1	0	0	0	0	0	0	0	0	0
Prosthecobacter	1	0	0	0	1	0	0	0	0	0
Prosthecochloris	1	0	0	0	0	0	0	0	0	0
Protaetiibacter	1	0	1	0	0	0	0	1	0	0
Proteiniphilum	1	0	0	0	1	0	1	0	0	0
Providencia	1	0	0	0	1	1	1	1	0	0
Pseudanabaena	1	0	0	0	1	0	0	0	0	0
Pseudarthrobacter	1	0	1	0	1	1	0	0	0	0
Pseudoalteromonas	1	0	0	0	1	1	0	1	0	0
Pseudobacter	1	0	0	0	1	0	0	0	0	0
Pseudolabrys	1	0	0	0	1	0	0	0	0	0
Pseudomonas	1	1	1	1	1	1	1	1	0	1
Pseudonocardia	1	0	1	1	1	1	1	1	0	0
Pseudopedobacter	1	0	0	0	0	0	0	0	0	0
Pseudopropionibacterium	1	0	1	0	1	0	0	0	0	0
Pseudorhodoplanes	1	0	0	0	0	0	0	0	0	0
Pseudothermotoga	1	0	0	0	0	0	0	0	0	0
Pseudoxanthomonas	1	0	1	0	1	0	0	0	0	0
Psychrobacillus	1	0	0	0	0	0	0	0	0	0
Psychrobacter	1	0	1	0	1	1	1	1	0	1
Pulveribacter	1	0	1	0	0	0	0	0	0	0
Raineya	1	0	0	0	0	0	0	0	0	0
Ralstonia	1	1	1	1	1	1	0	1	0	0
Ramlibacter	1	1	1	0	1	0	1	0	0	1
Raoultella	1	0	1	0	0	1	0	0	0	0
Rathayibacter	1	1	0	0	0	1	0	1	0	0
Renibacterium	1	0	0	0	0	0	0	0	0	0
Reyranella	1	0	1	0	0	0	0	0	0	0
Rheinheimera	1	0	1	0	1	0	0	0	0	1
Rhizobacter	1	0	1	0	1	1	1	0	0	0
Rhizobium	1	1	1	0	1	0	0	1	0	0
Rhizorhabdus	1	0	0	1	0	0	0	0	0	0
Rhodanobacter	1	0	0	0	0	0	0	0	0	0
Rhodobacter	1	0	1	0	0	0	0	1	0	1
Rhodococcus	1	1	1	0	1	1	1	1	0	0
Rhodoferax	1	0	1	1	1	0	0	0	0	1
Rhodoluna	1	0	0	1	1	1	0	1	0	0
Rhodopseudomonas	1	0	1	1	1	0	0	1	0	0
Rhodospirillum	1	0	1	0	0	0	0	0	0	0
Rickettsia	1	0	0	0	1	0	0	0	0	0
Rickettsiella	1	0	0	0	1	0	0	0	0	0
Riemerella	1	0	1	0	1	0	0	1	0	0
Romboutsia	1	0	1	1	1	1	0	0	0	0
Roseateles	1	0	1	0	1	0	1	1	0	0
Roseburia	1	0	1	0	1	1	1	0	0	1
Roseiflexus	1	0	1	0	0	0	0	0	0	0
Roseomonas	1	1	1	1	1	1	1	0	0	0
Rothia	1	1	1	1	1	1	1	1	0	0
Rubellimicrobium	1	0	0	0	0	0	0	0	0	1
Rubinisphaera	1	0	0	0	0	0	0	0	0	0
Rubrivivax	1	0	1	0	1	0	0	0	0	1
Ruegeria	1	0	1	0	1	0	0	0	0	1
Rufibacter	1	0	0	0	1	0	0	0	0	0
Ruminiclostridium	1	0	0	0	0	0	0	0	0	0
Ruminococcus	1	0	1	0	1	1	0	0	0	0
Runella	1	0	0	0	1	0	0	0	0	0
Ruthenibacterium	1	0	0	1	0	1	0	0	0	0
Saccharibacillus	1	0	0	0	0	0	0	1	0	0
Saccharomonospora	1	0	0	0	0	0	0	0	0	0
Saccharopolyspora	1	0	0	0	0	0	0	0	0	0
Saccharothrix	1	0	0	0	1	0	0	0	0	0
Salegentibacter	1	0	0	0	1	0	0	0	0	0
Salinibacterium	1	0	1	0	0	0	0	1	0	0
Salinicoccus	1	0	0	0	1	0	0	0	0	0
Salinicola	1	0	0	0	0	0	0	0	0	0
Salinimicrobium	1	0	0	0	0	0	0	0	0	0
Salinivirga	1	0	0	0	0	0	0	0	0	0
Salmonella	1	1	1	0	0	1	0	1	0	1
Sandaracinus	1	0	1	0	0	0	0	0	0	0
Sanguibacter	1	0	0	0	1	0	0	0	0	0
Saprospira	1	0	0	0	1	0	0	0	0	0
Schaalia	1	1	1	1	1	1	0	1	0	0
Scytonema	1	0	0	0	1	1	0	0	0	0
Sediminihabitans	1	0	0	0	0	0	0	0	0	0
Selenomonas	1	0	1	1	1	1	0	0	0	0
Serinicoccus	1	0	0	0	0	0	0	0	0	0
Serpentinomonas	1	1	1	0	0	0	0	0	0	1
Serratia	1	1	1	1	1	1	1	1	0	1
Shewanella	1	0	1	0	1	1	0	1	0	1
Shigella	1	0	0	1	1	1	1	1	0	1
Shinella	1	0	1	0	1	0	0	0	0	0
Simonsiella	1	0	0	0	1	0	0	0	0	0
Singulisphaera	1	0	1	1	1	1	0	0	0	0
Sinorhizobium	1	0	1	0	1	1	0	1	0	0
Siphonobacter	1	0	0	0	0	0	0	0	0	1
Skermanella	1	0	0	1	0	0	0	0	0	0
Slackia	1	0	0	0	0	1	0	0	0	0
Solibacillus	1	0	0	0	1	0	0	0	0	0
Solimonas	1	0	0	0	1	0	0	1	0	0
Solirubrobacter	1	0	0	0	0	0	0	0	0	0
Solitalea	1	0	0	0	1	0	0	0	0	0
Sorangium	1	0	1	0	1	0	0	0	0	0
Sphaerobacter	1	0	0	0	1	0	0	0	0	0
Sphingobacterium	1	0	1	0	1	0	0	1	0	1
Sphingobium	1	0	1	1	1	1	0	1	0	0
Sphingomonas	1	1	1	1	1	1	1	1	0	1
Sphingopyxis	1	0	1	1	1	0	0	1	0	0
Sphingorhabdus	1	0	0	0	0	0	0	0	1	0
Sphingosinicella	1	0	1	0	1	0	0	0	0	0
Spirirestis	1	0	0	0	0	0	0	0	0	0
Spirochaeta	1	0	1	0	1	0	0	0	0	0
Spiroplasma	1	0	1	0	1	0	0	0	0	0
Spirosoma	1	0	1	0	1	0	0	0	0	0
Sporomusa	1	0	0	0	0	0	0	0	0	0
Stackebrandtia	1	0	0	0	0	0	0	1	0	0
Stanieria	1	0	0	0	0	0	0	0	0	0
Staphylococcus	1	1	1	1	1	1	1	1	0	1
Staphylospora	1	0	0	0	0	0	0	0	0	0
Stappia	1	0	0	0	0	0	0	0	0	0
Starkeya	1	0	1	0	0	1	0	0	0	0
Stella	1	0	0	0	1	0	0	1	0	0
Stenotrophomonas	1	0	1	1	1	1	1	1	0	1
Steroidobacter	1	0	0	0	1	1	0	0	0	0
Sterolibacterium	1	0	1	0	1	0	0	0	0	0
Stigmatella	1	0	1	0	0	0	0	1	0	0
Streptococcus	1	1	1	1	1	1	1	1	0	1
Streptomonospora	1	0	0	0	0	0	0	0	0	0
Streptomyces	1	1	1	0	1	0	0	1	0	0
Suicoccus	1	0	1	0	1	0	0	0	0	0
Sulfobacillus	1	0	0	0	0	0	0	0	0	0
Sulfuriferula	1	0	0	0	0	0	0	0	0	0
Sulfurihydrogenibium	1	1	1	0	0	0	0	0	0	0
Sulfuritalea	1	0	0	0	1	0	0	0	0	0
Sulfurospirillum	1	0	0	0	1	0	0	0	0	0
Swingsia	1	0	0	0	0	0	0	1	0	0
Synechococcus	1	0	1	0	1	1	0	0	0	0
Synechocystis	1	0	0	0	1	0	0	0	0	0
Syntrophobacter	1	0	0	0	0	0	0	0	0	0
Tabrizicola	1	0	0	0	1	0	0	0	0	0
Tamlana	1	0	0	0	0	0	0	0	0	0
Tannerella	1	0	1	1	1	1	0	0	0	0
Tardiphaga	1	0	1	0	0	0	0	1	0	0
Tenacibaculum	1	0	1	0	1	1	0	0	0	0
Tepidimonas	1	1	0	0	0	0	0	0	0	1
Tepidiphilus	1	0	1	0	0	0	0	0	0	0
Terriglobus	1	0	0	0	1	0	0	0	0	0
Tessaracoccus	1	0	0	0	1	0	0	1	0	0
Thalassospira	1	0	1	0	0	0	0	0	0	0
Thauera	1	0	1	0	1	0	0	1	0	0
Thermanaeromonas	1	0	0	0	0	0	0	1	0	0
Thermincola	1	0	0	0	0	0	0	0	0	0
Thermoanaerobacterium	1	0	0	0	0	0	0	1	0	0
Thermobaculum	1	0	0	0	0	0	0	0	0	0
Thermocrinis	1	0	0	0	0	0	0	0	0	0
Thermogemmatispora	1	0	0	0	1	0	0	0	0	0
Thermogutta	1	0	0	0	1	0	0	0	0	0
Thermomicrobium	1	0	0	0	0	0	0	0	0	0
Thermomonas	1	0	1	0	0	0	0	0	0	0
Thermosediminibacter	1	0	0	0	0	0	0	0	0	0
Thermostaphylospora	1	0	0	0	0	0	0	0	0	0
Thermosulfidibacter	1	0	0	0	0	0	0	0	0	0
Thermus	1	1	1	0	1	0	0	1	0	0
Thioalkalivibrio	1	0	0	0	0	0	0	0	0	0
Thioflavicoccus	1	0	1	0	0	0	0	0	0	0
Thiomicrorhabdus	1	0	0	0	1	0	0	0	0	0
Thiomicrospira	1	0	0	0	1	0	0	0	0	0
Thiomonas	1	0	0	0	1	0	0	1	0	0
Tolumonas	1	0	1	0	1	0	0	0	0	0
Tomitella	1	0	0	0	0	0	0	1	0	0
Treponema	1	0	1	1	1	1	1	0	0	0
Trichodesmium	1	0	0	0	0	0	0	0	0	0
Truepera	1	0	0	1	1	1	0	0	0	0
Tsukamurella	1	0	1	1	0	0	0	1	0	0
Turicibacter	1	0	1	0	0	1	0	0	0	0
Uliginosibacterium	1	0	0	0	0	0	0	0	0	0
Undibacterium	1	0	1	0	1	1	0	0	0	0
Ureaplasma	1	0	0	0	0	0	0	0	0	0
Vagococcus	1	0	1	0	1	0	0	0	0	0
Varibaculum	1	0	0	0	0	0	0	0	0	0
Variovorax	1	1	1	1	1	1	0	1	0	0
Veillonella	1	1	1	1	1	1	1	1	0	1
Verrucomicrobium	1	0	1	0	1	0	0	0	0	0
Vibrio	1	0	1	0	1	1	0	1	0	0
Virgibacillus	1	0	0	0	1	0	0	0	0	0
Vogesella	1	0	0	0	0	0	0	0	0	1
Vulcaniibacterium	1	0	0	0	0	0	0	0	0	0
Wautersiella	1	0	0	0	0	0	0	0	0	0
Weeksella	1	0	1	0	1	1	0	1	0	0
Weissella	1	0	1	0	1	0	0	1	0	0
Wenzhouxiangella	1	0	0	0	0	0	0	0	0	0
Williamsia	1	0	0	0	0	0	0	0	0	0
Winkia	1	0	0	0	0	0	0	0	0	0
Winogradskyella	1	0	1	0	1	0	0	0	0	0
Wolinella	1	0	0	0	0	0	0	0	0	0
Xanthobacter	1	0	1	0	0	0	0	0	0	0
Xanthomonas	1	0	1	0	1	0	1	1	0	0
Xenophilus	1	0	0	1	0	0	0	0	0	0
Xylanimicrobium	1	0	0	0	0	0	0	1	0	0
Xylanimonas	1	0	0	0	1	0	0	1	0	0
Yangia	1	0	0	0	0	0	0	1	0	0
Zobellia	1	0	0	0	0	0	0	0	0	0
Zunongwangia	1	0	0	0	1	0	0	0	0	0
Zymobacter	1	0	0	0	0	0	0	0	0	0
Actinoallomurus	0	1	0	0	0	0	0	0	0	0
Afipia	0	1	1	0	1	0	0	1	0	0
Alcanivorax	0	1	1	0	1	0	1	0	0	0
Anderseniella	0	1	0	1	1	1	1	0	0	1
Asticcacaulis	0	1	1	0	0	1	0	0	0	1
Avibacterium	0	1	0	0	0	0	0	0	0	0
Chrysosporum	0	1	0	0	0	0	0	0	0	0
Ephemeroptericola	0	1	0	0	1	0	0	0	0	0
Kineococcus	0	1	0	0	1	0	0	1	0	0
Propionivibrio	0	1	0	0	0	0	0	0	0	0
Pseudacidovorax	0	1	0	0	0	0	0	0	0	0
Sarcina	0	1	0	0	0	0	0	0	0	0
Sulfitobacter	0	1	1	0	1	0	0	1	0	1
Sulfuritortus	0	1	1	0	0	0	0	0	0	0
Sulfurivermis	0	1	1	0	1	0	0	0	0	0
Actinomadura	0	0	1	0	1	0	0	1	0	0
Ahniella	0	0	1	0	0	0	0	0	0	0
Allokutzneria	0	0	1	0	0	0	0	0	0	0
Anoxybacter	0	0	1	0	1	0	0	0	0	0
Aquipuribacter	0	0	1	0	0	0	0	0	0	0
Aromatoleum	0	0	1	0	0	0	0	1	0	0
Blastomonas	0	0	1	0	0	0	0	0	0	0
Boseongicola	0	0	1	0	1	0	0	0	0	0
Butyricimonas	0	0	1	0	1	0	0	0	0	0
Calditerrivibrio	0	0	1	0	1	0	0	0	0	0
Candidatus Accumulibacter	0	0	1	0	0	0	0	0	0	0
Candidatus Phaeomarinobacter	0	0	1	0	0	0	0	0	0	0
Candidatus Saccharimonas	0	0	1	0	1	0	0	0	0	0
Candidatus Sumerlaea	0	0	1	0	0	0	0	0	0	0
Catenovulum	0	0	1	0	0	0	0	0	0	0
Chlamydia	0	0	1	0	1	0	0	0	1	0
Clavibacter	0	0	1	1	1	0	0	1	0	0
Colwellia	0	0	1	0	1	0	0	0	0	0
Coprothermobacter	0	0	1	0	0	0	0	0	0	0
Crinalium	0	0	1	0	0	0	0	0	0	0
Dehalobacter	0	0	1	0	1	0	0	0	0	0
Denitrobacterium	0	0	1	0	1	0	0	0	0	0
Enhydrobacter	0	0	1	0	0	0	0	0	0	0
Erwinia	0	0	1	0	1	0	0	0	0	0
Ferriphaselus	0	0	1	0	0	0	0	0	0	0
Gibbsiella	0	0	1	0	0	0	0	0	0	0
Glycocaulis	0	0	1	0	0	0	0	0	0	0
Gramella	0	0	1	0	1	0	0	0	0	0
Helicobacter	0	0	1	0	1	0	0	0	0	1
Indioceanicola	0	0	1	0	0	1	0	0	0	0
Intestinimonas	0	0	1	1	1	1	0	0	0	0
Kangiella	0	0	1	0	0	0	0	0	0	0
Kerstersia	0	0	1	0	1	0	0	0	0	0
Kutzneria	0	0	1	0	1	0	0	0	0	0
Lacinutrix	0	0	1	0	1	0	0	0	0	0
Liberibacter	0	0	1	0	1	0	0	0	0	0
Lichenihabitans	0	0	1	0	0	0	0	0	0	0
Luteipulveratus	0	0	1	0	1	0	0	1	0	0
Marinobacter	0	0	1	0	1	0	0	1	0	0
Melittangium	0	0	1	0	0	0	0	0	0	0
Methylovirgula	0	0	1	0	1	0	0	0	0	0
Orrella	0	0	1	0	0	0	0	0	0	0
Pannonibacter	0	0	1	0	0	0	0	0	0	0
Paraoceanicella	0	0	1	0	0	0	1	0	0	1
Parasphingorhabdus	0	0	1	0	1	0	0	0	0	0
Pelagibaca	0	0	1	0	0	0	0	0	0	0
Pelomonas	0	0	1	0	0	0	1	0	0	0
Perlucidibaca	0	0	1	0	0	0	0	0	0	0
Phascolarctobacterium	0	0	1	0	1	0	0	0	0	0
Pigmentiphaga	0	0	1	0	1	0	0	0	0	0
Plantactinospora	0	0	1	0	1	0	0	1	0	0
Pluralibacter	0	0	1	0	1	0	0	0	0	0
Pragia	0	0	1	0	0	0	0	0	0	0
Proteus	0	0	1	0	1	0	0	0	0	0
Pseudescherichia	0	0	1	0	1	0	0	0	0	0
Pseudogulbenkiania	0	0	1	0	1	0	0	1	0	0
Psychromonas	0	0	1	0	0	0	0	0	0	0
Qipengyuania	0	0	1	0	1	0	0	0	0	0
Rahnella	0	0	1	1	1	0	0	0	0	0
Roseibacterium	0	0	1	0	0	0	0	0	0	0
Rubrobacter	0	0	1	0	1	0	0	0	0	0
Sagittula	0	0	1	0	1	0	0	0	0	0
Siccationidurans	0	0	1	0	0	0	0	0	0	0
Simplicispira	0	0	1	0	1	0	0	0	0	0
Streptosporangium	0	0	1	0	1	0	1	0	0	0
Sulfuricella	0	0	1	0	0	0	0	0	0	0
Sulfuricurvum	0	0	1	0	0	0	0	0	0	0
Taylorella	0	0	1	0	0	0	0	0	0	0
Terasakiella	0	0	1	0	0	0	0	0	0	0
Terrisporobacter	0	0	1	1	1	0	0	0	0	0
Thalassolituus	0	0	1	0	0	0	0	0	0	0
Thermobifida	0	0	1	0	0	0	0	0	0	0
Thermodesulfovibrio	0	0	1	0	0	0	0	0	0	0
Thermosynechococcus	0	0	1	0	1	0	0	0	0	0
Thiobacillus	0	0	1	0	0	0	0	0	0	0
Thioclava	0	0	1	0	0	0	1	0	0	0
Tumebacillus	0	0	1	0	0	0	0	0	0	0
Variibacter	0	0	1	0	1	0	0	0	0	1
Verminephrobacter	0	0	1	0	1	0	0	0	0	0
Vulgatibacter	0	0	1	0	0	0	0	0	0	0
Waddlia	0	0	1	0	0	0	0	0	0	0
Wolbachia	0	0	1	0	1	1	0	0	0	0
Acutalibacter	0	0	0	1	1	1	0	0	0	0
Alloscardovia	0	0	0	1	0	1	0	0	0	0
Aminobacter	0	0	0	1	0	1	0	0	0	0
Christensenella	0	0	0	1	1	1	0	0	0	0
Enterocloster	0	0	0	1	1	1	0	0	0	0
Erysipelothrix	0	0	0	1	1	0	0	0	0	0
Herbinix	0	0	0	1	0	1	0	0	0	0
Methylobacillus	0	0	0	1	0	0	0	0	0	0
Scardovia	0	0	0	1	0	0	0	0	0	0
Ureibacillus	0	0	0	1	0	1	0	1	0	0
Adhaeribacter	0	0	0	0	1	0	0	0	0	0
Alienimonas	0	0	0	0	1	0	0	0	0	0
Aliivibrio	0	0	0	0	1	0	0	0	0	0
Allofrancisella	0	0	0	0	1	0	0	0	0	0
Apibacter	0	0	0	0	1	0	0	0	0	0
Aquamicrobium	0	0	0	0	1	0	0	0	0	0
Aquimarina	0	0	0	0	1	0	0	0	0	0
Arcicella	0	0	0	0	1	0	0	0	0	0
Arenibacter	0	0	0	0	1	0	0	0	0	0
Aureitalea	0	0	0	0	1	0	0	0	0	0
Azovibrio	0	0	0	0	1	0	0	0	0	0
Basilea	0	0	0	0	1	0	0	0	0	0
Belliella	0	0	0	0	1	0	0	0	0	0
Bergeyella	0	0	0	0	1	0	0	0	0	0
Breoghania	0	0	0	0	1	0	0	0	0	0
Brucella	0	0	0	0	1	0	0	0	0	0
Candidatus Arthromitus	0	0	0	0	1	0	0	0	0	0
Candidatus Cardinium	0	0	0	0	1	0	0	0	0	0
Candidatus Competibacter	0	0	0	0	1	0	0	0	0	0
Candidatus Deianiraea	0	0	0	0	1	0	0	0	0	0
Candidatus Desulfofervidus	0	0	0	0	1	0	0	0	0	0
Candidatus Desulforudis	0	0	0	0	1	0	0	0	0	0
Candidatus Izimaplasma	0	0	0	0	1	0	0	0	0	0
Candidatus Koribacter	0	0	0	0	1	0	0	0	0	0
Candidatus Nanopelagicus	0	0	0	0	1	0	0	0	0	0
Candidatus Nardonella	0	0	0	0	1	0	0	0	0	0
Candidatus Nucleicultrix	0	0	0	0	1	0	0	0	0	0
Candidatus Pelagibacter	0	0	0	0	1	0	0	0	0	0
Candidatus Portiera	0	0	0	0	1	0	0	0	0	0
Candidatus Promineofilum	0	0	0	0	1	0	0	0	0	0
Candidatus Sulcia	0	0	0	0	1	0	0	0	0	0
Candidatus Symbiobacter	0	0	0	0	1	0	0	0	0	0
Caproiciproducens	0	0	0	0	1	0	0	0	0	0
Cellulosilyticum	0	0	0	0	1	0	0	0	0	0
Chelativorans	0	0	0	0	1	0	0	0	0	0
Chishuiella	0	0	0	0	1	0	0	0	0	0
Citromicrobium	0	0	0	0	1	1	0	0	0	0
Cyanothece	0	0	0	0	1	0	0	0	0	0
Dactylosporangium	0	0	0	0	1	0	0	0	0	0
Dermatophilus	0	0	0	0	1	0	0	0	0	0
Desulfobulbus	0	0	0	0	1	0	0	0	0	0
Desulfocurvibacter	0	0	0	0	1	0	0	0	0	0
Desulfomicrobium	0	0	0	0	1	0	0	0	0	0
Desulfosporosinus	0	0	0	0	1	0	0	0	0	0
Desulfotalea	0	0	0	0	1	0	0	0	0	0
Desulfurobacterium	0	0	0	0	1	0	0	0	0	0
Dickeya	0	0	0	0	1	0	0	0	0	0
Dolichospermum	0	0	0	0	1	0	0	0	0	0
Eleftheria	0	0	0	0	1	0	0	0	0	0
Emcibacter	0	0	0	0	1	0	0	0	0	0
Empedobacter	0	0	0	0	1	0	0	0	0	0
Enterovibrio	0	0	0	0	1	0	0	0	0	0
Ereboglobus	0	0	0	0	1	0	0	0	0	0
Eubacterium	0	0	0	0	1	1	0	0	0	0
Euzebya	0	0	0	0	1	0	0	0	0	0
Euzebyella	0	0	0	0	1	0	0	0	0	0
Flammeovirga	0	0	0	0	1	0	0	0	0	0
Formosa	0	0	0	0	1	0	0	0	0	0
Geovibrio	0	0	0	0	1	0	0	0	0	0
Gottschalkia	0	0	0	0	1	1	0	0	0	0
Halobacteroides	0	0	0	0	1	0	0	0	0	0
Hoeflea	0	0	0	0	1	0	0	0	0	0
Idiomarina	0	0	0	0	1	0	0	0	0	0
Ignavibacterium	0	0	0	0	1	0	0	0	0	0
Jeotgalibacillus	0	0	0	0	1	0	0	0	0	0
Kingella	0	0	0	0	1	1	0	0	0	0
Kordia	0	0	0	0	1	0	0	0	0	0
Ktedonosporobacter	0	0	0	0	1	0	0	0	0	0
Laribacter	0	0	0	0	1	0	0	0	0	0
Lawsonia	0	0	0	0	1	1	0	0	0	0
Leptolinea	0	0	0	0	1	0	0	0	0	0
Listeria	0	0	0	0	1	0	0	0	0	0
Litorilinea	0	0	0	0	1	0	0	0	0	0
Maricaulis	0	0	0	0	1	0	0	0	0	0
Mariniflexile	0	0	0	0	1	0	0	0	0	0
Mariprofundus	0	0	0	0	1	0	0	0	0	0
Martelella	0	0	0	0	1	0	0	0	0	0
Mesoplasma	0	0	0	0	1	0	0	0	0	0
Methylomicrobium	0	0	0	0	1	0	0	0	0	0
Methylomonas	0	0	0	0	1	0	0	0	0	0
Micavibrio	0	0	0	0	1	0	0	0	0	0
Micropruina	0	0	0	0	1	0	0	1	0	0
Moorea	0	0	0	0	1	0	0	0	0	0
Mucinivorans	0	0	0	0	1	0	0	0	0	0
Muriicola	0	0	0	0	1	0	0	0	0	0
Mycetohabitans	0	0	0	0	1	0	0	0	0	0
Mycoavidus	0	0	0	0	1	0	0	0	0	0
Neokomagataea	0	0	0	0	1	0	1	0	0	0
Nitrosomonas	0	0	0	0	1	0	0	0	0	0
Oceanobacillus	0	0	0	0	1	0	0	0	0	0
Oleiphilus	0	0	0	0	1	0	0	0	0	0
Orientia	0	0	0	0	1	0	0	0	0	0
Oxalobacter	0	0	0	0	1	0	0	0	0	0
Paraphotobacterium	0	0	0	0	1	0	0	0	0	0
Parvibaculum	0	0	0	0	1	0	1	0	0	0
Photobacterium	0	0	0	0	1	0	0	0	0	0
Photorhabdus	0	0	0	0	1	0	0	0	0	0
Piscirickettsia	0	0	0	0	1	0	0	0	0	0
Planktothrix	0	0	0	0	1	0	0	0	0	0
Polymorphobacter	0	0	0	0	1	0	0	0	0	0
Polymorphum	0	0	0	0	1	0	0	0	0	0
Prauserella	0	0	0	0	1	0	0	0	0	0
Prochlorococcus	0	0	0	0	1	0	0	0	0	0
Pseudoclavibacter	0	0	0	0	1	0	0	0	0	0
Pseudorhodobacter	0	0	0	0	1	0	0	0	0	0
Psychroflexus	0	0	0	0	1	0	0	0	0	0
Psychroserpens	0	0	0	0	1	0	0	0	0	0
Pusillimonas	0	0	0	0	1	0	0	0	0	0
Raphidiopsis	0	0	0	0	1	0	0	0	0	0
Reinekea	0	0	0	0	1	0	0	0	0	0
Rhodoplanes	0	0	0	0	1	0	0	1	0	0
Robinsoniella	0	0	0	0	1	0	0	0	0	0
Salicibibacter	0	0	0	0	1	0	0	0	0	0
Sedimentisphaera	0	0	0	0	1	0	0	0	0	0
Sedimentitalea	0	0	0	0	1	0	0	0	0	0
Sediminibacterium	0	0	0	0	1	0	0	0	0	0
Seonamhaeicola	0	0	0	0	1	0	0	0	0	0
Simkania	0	0	0	0	1	0	0	0	0	0
Sneathia	0	0	0	0	1	0	0	0	0	0
Snodgrassella	0	0	0	0	1	0	0	0	0	0
Spiribacter	0	0	0	0	1	0	0	0	0	0
Sporanaerobacter	0	0	0	0	1	0	0	0	0	0
Streptobacillus	0	0	0	0	1	0	0	0	0	0
Sulfurifustis	0	0	0	0	1	1	0	1	0	0
Syntrophothermus	0	0	0	0	1	0	0	0	0	0
Syntrophus	0	0	0	0	1	0	0	0	0	0
Tardibacter	0	0	0	0	1	0	0	1	0	0
Tateyamaria	0	0	0	0	1	0	0	0	0	0
Tetragenococcus	0	0	0	0	1	0	0	0	0	0
Thermoactinomyces	0	0	0	0	1	0	0	0	0	0
Thermoclostridium	0	0	0	0	1	0	0	0	0	0
Thermomonospora	0	0	0	0	1	0	0	0	0	0
Trueperella	0	0	0	0	1	1	0	0	0	0
Turneriella	0	0	0	0	1	0	0	0	0	0
Tyzzerella	0	0	0	0	1	0	0	0	0	0
Urechidicola	0	0	0	0	1	0	0	0	0	0
Vitreoscilla	0	0	0	0	1	0	0	0	0	0
Woeseia	0	0	0	0	1	0	0	0	0	0
Woronichinia	0	0	0	0	1	0	0	0	0	0
Xenorhabdus	0	0	0	0	1	0	0	0	0	0
Xylella	0	0	0	0	1	0	0	0	0	0
Yersinia	0	0	0	0	1	1	0	0	0	1
Yoonia	0	0	0	0	1	0	0	0	0	0
Zoogloea	0	0	0	0	1	0	0	0	0	0
Basfia	0	0	0	0	0	1	0	0	0	0
Candidatus Cloacimonas	0	0	0	0	0	1	0	0	0	0
Congobacterium	0	0	0	0	0	1	0	0	0	0
Dehalobacterium	0	0	0	0	0	1	0	0	0	0
Gandjariella	0	0	0	0	0	1	0	0	0	0
Komagataeibacter	0	0	0	0	0	1	0	0	0	0
Macrochaete	0	0	0	0	0	1	0	0	0	0
Massilistercora	0	0	0	0	0	1	0	0	0	1
Ndongobacter	0	0	0	0	0	1	0	0	0	0
Oribacterium	0	0	0	0	0	1	0	0	0	0
Pararhodospirillum	0	0	0	0	0	1	0	0	0	0
Pseudodesulfovibrio	0	0	0	0	0	1	0	0	0	0
Pyramidobacter	0	0	0	0	0	1	0	0	0	0
Rippkaea	0	0	0	0	0	1	0	0	0	0
Taibaiella	0	0	0	0	0	1	0	0	0	0
Thiodictyon	0	0	0	0	0	1	0	0	0	0
Zymomonas	0	0	0	0	0	1	0	0	0	0
Acaricomes	0	0	0	0	0	0	1	0	0	0
Atlantibacter	0	0	0	0	0	0	1	0	0	0
Monaibacterium	0	0	0	0	0	0	1	0	0	0
Phormidium	0	0	0	0	0	0	1	0	0	0
Propioniciclava	0	0	0	0	0	0	1	0	0	0
Thalassococcus	0	0	0	0	0	0	1	0	0	1
Acetobacterium	0	0	0	0	0	0	0	1	0	0
Actinoalloteichus	0	0	0	0	0	0	0	1	0	0
Beutenbergia	0	0	0	0	0	0	0	1	0	0
Candidatus Methylomirabilis	0	0	0	0	0	0	0	1	0	0
Cedecea	0	0	0	0	0	0	0	1	0	0
Cnuibacter	0	0	0	0	0	0	0	1	0	0
Cyanobium	0	0	0	0	0	0	0	1	0	0
Dokdonia	0	0	0	0	0	0	0	1	0	0
Gemmobacter	0	0	0	0	0	0	0	1	0	0
Gloeobacter	0	0	0	0	0	0	0	1	0	0
Gloeocapsopsis	0	0	0	0	0	0	0	1	0	0
Gryllotalpicola	0	0	0	0	0	0	0	1	0	0
Halobacillus	0	0	0	0	0	0	0	1	0	0
Hydrocarboniphaga	0	0	0	0	0	0	0	1	0	0
Immundisolibacter	0	0	0	0	0	0	0	1	0	0
Mycetocola	0	0	0	0	0	0	0	1	0	0
Nitratifractor	0	0	0	0	0	0	0	1	0	0
Oceanithermus	0	0	0	0	0	0	0	1	0	0
Scytonematopsis	0	0	0	0	0	0	0	1	0	0
Thermicanus	0	0	0	0	0	0	0	1	0	1
Zhihengliuella	0	0	0	0	0	0	0	1	0	0
Alkalibacterium	0	0	0	0	0	0	0	0	0	1
Crenobacter	0	0	0	0	0	0	0	0	0	1
Histophilus	0	0	0	0	0	0	0	0	0	1
Octadecabacter	0	0	0	0	0	0	0	0	0	1

## Sheet: All_vs_ALL_upset_Bact_species
ID	OurStudyALSblood	Linsley2014	Gagliardi2018	Brohawn2016	Ladd2017	Brohawn2019	Emanuel2020	Shin2014	Humphrys2016	VonSchack2018
Abiotrophia defectiva	1	0	0	0	0	0	0	0	0	0
Abiotrophia sp. canine oral taxon 229	1	0	0	0	1	0	0	0	0	0
Acaryochloris marina	1	0	0	0	0	0	0	0	0	0
Acetobacter ghanensis	1	0	0	0	0	0	0	0	0	0
Acetobacter indonesiensis	1	0	0	0	0	0	0	0	0	0
Acetobacter nitrogenifigens	1	0	0	0	0	0	0	0	0	0
Acetobacter sp.	1	0	0	0	0	0	0	0	0	0
Achromobacter denitrificans	1	0	1	0	0	1	0	0	0	0
Achromobacter insolitus	1	0	1	0	1	0	0	0	0	0
Achromobacter insuavis	1	0	0	0	0	0	0	0	0	0
Achromobacter ruhlandii	1	0	0	0	1	1	0	0	0	0
Achromobacter sp.	1	0	0	0	0	0	0	0	0	0
Achromobacter sp. AONIH1	1	0	1	0	0	0	0	1	0	0
Achromobacter sp. B7	1	0	1	0	1	0	0	0	0	0
Achromobacter sp. MFA1 R4	1	0	0	0	0	0	0	0	0	0
Achromobacter sp. N1A1_2015	1	0	0	0	0	0	0	0	0	0
Achromobacter spanius	1	0	1	0	1	0	0	0	0	0
Achromobacter xylosoxidans	1	1	1	1	1	1	0	1	0	0
Acidaminococcus intestini	1	0	1	0	0	1	0	0	0	0
Acidibrevibacterium fodinaquatile	1	0	0	0	0	0	0	1	0	0
Acidihalobacter ferrooxidans	1	0	0	0	0	0	0	0	0	0
Acidimicrobium ferrooxidans	1	0	0	0	0	0	0	0	0	0
Acidiphilium cryptum	1	0	0	0	0	0	0	0	0	0
Acidipropionibacterium acidipropionici	1	0	0	0	0	0	0	0	0	0
Acidipropionibacterium jensenii	1	0	0	0	0	0	0	1	0	0
Acidisarcina polymorpha	1	0	0	0	0	0	0	0	0	0
Acidithiobacillus caldus	1	0	0	0	0	0	0	0	0	0
Acidithiomicrobium sp. P2	1	0	0	0	1	0	0	0	0	0
Acidothermus cellulolyticus	1	0	0	0	0	0	0	0	0	0
Acidovorax avenae	1	0	1	0	1	1	0	0	0	0
Acidovorax carolinensis	1	0	1	1	1	0	0	1	0	1
Acidovorax cattleyae	1	0	1	0	1	0	0	0	0	0
Acidovorax citrulli	1	0	1	0	1	1	0	0	0	0
Acidovorax sp. 1608163	1	1	1	0	1	1	0	1	0	1
Acidovorax sp. ALBL_202	1	0	0	0	1	0	0	0	0	0
Acidovorax sp. JS42	1	0	1	1	0	1	0	0	0	0
Acidovorax sp. KKS102	1	0	1	0	1	0	0	1	0	1
Acidovorax temperans	1	0	0	0	0	0	0	0	0	0
Acidovorax wohlfahrtii	1	0	0	0	0	0	0	0	0	0
Acinetobacter baumannii	1	1	1	0	1	0	0	1	0	1
Acinetobacter bereziniae	1	0	0	0	1	0	0	1	0	0
Acinetobacter calcoaceticus	1	0	0	0	0	1	0	0	0	0
Acinetobacter cumulans	1	1	1	0	0	0	0	0	0	0
Acinetobacter guillouiae	1	0	0	0	1	0	0	0	0	0
Acinetobacter haemolyticus	1	0	1	0	0	1	0	1	0	0
Acinetobacter indicus	1	0	1	0	0	0	0	0	0	0
Acinetobacter johnsonii	1	1	1	0	1	1	1	1	0	1
Acinetobacter junii	1	1	1	0	1	0	0	1	0	0
Acinetobacter lwoffii	1	1	1	0	1	1	1	1	0	1
Acinetobacter nosocomialis	1	0	1	0	1	0	0	1	0	0
Acinetobacter pittii	1	1	1	0	1	0	0	1	0	1
Acinetobacter radioresistens	1	1	1	0	1	0	0	0	0	0
Acinetobacter rudis	1	0	0	0	0	0	0	0	0	0
Acinetobacter schindleri	1	0	1	0	1	1	0	1	0	0
Acinetobacter sp.	1	1	1	0	0	0	0	0	0	1
Acinetobacter sp. ACNIH1	1	1	1	0	0	0	0	0	0	0
Acinetobacter sp. ALBL_107	1	0	0	0	0	0	0	0	0	0
Acinetobacter sp. NCu2D-2	1	0	1	0	1	0	0	0	0	0
Acinetobacter sp. S23	1	0	0	0	0	0	0	0	0	0
Acinetobacter sp. SWBY1	1	0	0	0	0	1	0	0	0	0
Acinetobacter sp. TGL-Y2	1	0	1	0	1	0	0	0	0	0
Acinetobacter sp. WCHA55	1	0	1	0	0	0	1	0	0	0
Acinetobacter tandoii	1	0	0	0	0	0	0	0	0	0
Acinetobacter ursingii	1	1	1	0	1	0	1	0	0	0
Acinetobacter wuhouensis	1	0	1	0	0	0	0	0	0	0
Actinobacillus lignieresii	1	0	1	0	0	0	0	0	0	0
Actinobacteria bacterium	1	0	0	1	0	0	0	0	0	0
Actinobaculum sp. 313	1	0	0	0	1	0	0	0	0	0
Actinocorallia libanotica	1	0	0	0	0	0	0	0	0	0
Actinomyces gaoshouyii	1	0	1	0	0	0	0	0	0	0
Actinomyces hongkongensis	1	0	0	0	0	0	0	1	0	0
Actinomyces ihuae	1	0	0	0	0	0	0	0	0	0
Actinomyces naeslundii	1	1	1	1	1	0	0	1	0	1
Actinomyces oris	1	1	0	1	1	1	0	0	0	0
Actinomyces pacaensis	1	0	0	0	0	0	0	1	0	0
Actinomyces radicidentis	1	0	0	1	1	0	1	0	0	0
Actinomyces sp. 2129	1	0	0	0	0	0	0	0	0	0
Actinomyces sp. dk561	1	0	1	0	0	1	0	1	0	0
Actinomyces sp. oral taxon 171	1	1	1	0	1	1	1	0	0	1
Actinomyces sp. oral taxon 414	1	0	1	0	1	0	0	1	0	0
Actinomyces sp. oral taxon 848	1	0	0	0	0	0	0	0	0	0
Actinomyces sp. oral taxon 897	1	0	1	0	0	0	0	0	0	0
Actinomyces viscosus	1	1	1	1	0	1	0	0	0	1
Actinoplanes derwentensis	1	0	0	0	0	0	0	0	0	0
Actinoplanes sp. OR16	1	0	0	0	1	0	0	0	0	0
Actinopolymorpha singaporensis	1	0	1	0	0	0	0	0	0	0
Actinosynnema pretiosum	1	0	1	0	0	0	0	1	0	0
Actinotignum schaalii	1	0	0	0	0	0	0	0	0	0
Adelie penguin guano bacterium 58	1	0	0	0	0	0	0	0	0	0
Aequorivita sp. H23M31	1	0	0	0	0	0	0	0	0	0
Aeribacillus pallidus	1	0	1	0	0	0	0	0	0	1
Aerococcus christensenii	1	0	0	0	0	0	0	0	0	0
Aerococcus sanguinicola	1	0	0	0	0	0	0	0	0	0
Aerococcus urinae	1	0	0	0	0	0	0	0	0	0
Aerococcus urinaeequi	1	0	1	0	1	0	0	0	0	0
Aerococcus viridans	1	0	1	0	1	1	0	1	0	0
Aeromicrobium choanae	1	0	0	0	0	0	0	0	0	1
Aeromicrobium sp.	1	0	0	0	0	0	0	0	0	0
Aeromicrobium sp. 592	1	0	0	0	0	0	0	1	0	0
Aeromicrobium sp. A1-2	1	0	1	0	1	0	0	0	0	0
Aeromicrobium sp. PclMES3	1	0	0	0	0	0	0	0	0	0
Aeromonas caviae	1	0	1	0	1	1	0	1	0	0
Aeromonas dhakensis	1	0	0	0	0	0	0	0	0	0
Aeromonas enteropelogenes	1	0	1	0	0	0	0	0	0	0
Aeromonas sp. ASNIH3	1	0	0	0	0	0	0	1	0	0
Aeromonas sp. ASNIH7	1	0	0	0	0	0	0	0	0	0
Aeromonas veronii	1	0	1	0	0	0	0	0	0	0
Aerosticca soli	1	0	0	0	0	0	0	0	0	0
Agarilytica rhodophyticola	1	0	0	0	0	0	0	0	0	0
Agarivorans gilvus	1	0	0	0	0	0	0	0	0	0
Aggregatibacter aphrophilus	1	0	0	0	1	1	0	0	0	0
Aggregatibacter segnis	1	1	0	0	1	0	0	0	0	0
Agreia pratensis	1	0	0	0	0	0	0	0	0	0
Agrobacterium larrymoorei	1	0	0	0	0	0	0	0	0	0
Agrobacterium sp. SL26	1	0	0	0	1	0	0	0	0	0
Agrobacterium sp. T29	1	0	1	0	1	0	0	0	0	0
Agrobacterium tumefaciens	1	1	1	1	1	1	0	1	0	0
Agrobacterium vitis	1	0	0	0	0	0	0	0	0	0
Agrococcus carbonis	1	0	0	0	0	0	0	1	0	0
Agrococcus citreus	1	0	0	0	0	0	0	0	0	0
Agrococcus jejuensis	1	1	0	0	0	0	0	1	0	0
Agromyces flavus	1	0	1	0	0	0	0	1	0	0
Agromyces protaetiae	1	0	0	0	1	0	0	1	0	0
Agromyces sp. LHK192	1	0	1	0	1	0	0	1	0	0
Agromyces sp. VKM Ac-1802	1	0	0	0	0	0	0	0	0	0
Akkermansia glycaniphila	1	0	0	0	1	0	0	0	0	0
Akkermansia muciniphila	1	0	1	1	1	1	0	0	0	0
Alcaligenaceae bacterium SJ-26	1	0	1	0	0	0	0	0	0	0
Alcaligenes faecalis	1	0	0	0	1	0	0	0	0	0
Algibacter alginicilyticus	1	0	0	0	1	0	0	0	0	0
Algoriphagus sanaruensis	1	0	0	0	1	0	0	0	0	0
Alicycliphilus denitrificans	1	0	1	0	1	0	0	1	0	0
Alicycliphilus sp.	1	0	0	0	0	0	0	0	0	0
Alicyclobacillus contaminans	1	0	0	0	0	0	0	0	0	0
Alicyclobacillus fastidiosus	1	0	0	0	0	0	0	0	0	0
Alicyclobacillus genomosp. 1	1	0	0	0	0	0	0	0	0	0
Alicyclobacillus sp. Z27	1	0	0	0	0	0	0	0	0	0
Aliiglaciecola litoralis	1	0	0	0	0	0	0	0	0	0
Alishewanella sp.	1	0	0	0	0	0	0	0	0	0
Alistipes communis	1	0	0	0	0	0	0	0	0	0
Alistipes finegoldii	1	0	0	0	0	0	0	0	0	0
Alistipes megaguti	1	0	0	0	0	0	0	0	0	0
Alkalilimnicola ehrlichii	1	0	1	0	0	0	0	0	0	0
Alkaliphilus metalliredigens	1	0	0	0	0	0	0	0	0	0
Alkaliphilus oremlandii	1	0	0	0	1	0	0	0	0	0
Alkalitalea saponilacus	1	0	0	0	1	0	0	0	0	0
Alloactinosynnema sp. L-07	1	0	1	0	0	0	0	0	0	0
Allopseudarcicella aquatilis	1	1	0	0	1	1	0	0	0	0
Alphaproteobacteria bacterium	1	0	0	0	0	0	0	0	0	0
Altererythrobacter ishigakiensis	1	0	0	0	0	0	0	0	0	0
Altererythrobacter namhicola	1	0	0	0	0	0	0	0	0	0
Altererythrobacter sp. B11	1	0	0	0	0	0	0	0	0	0
Altererythrobacter sp. TH136	1	0	0	0	0	0	0	0	0	0
Alteromonas sp. RKMC-009	1	0	1	0	0	0	0	0	0	0
Amaricoccus kaplicensis	1	0	0	0	0	0	0	0	0	0
Aminipila sp. JN-18	1	0	0	0	1	0	0	0	0	0
Aminobacterium colombiense	1	0	0	0	0	0	0	0	0	0
Amphibacillus xylanus	1	0	0	0	0	0	0	0	0	0
Amycolatopsis sp.	1	0	0	0	0	0	0	0	0	0
Anabaena sp. 90	1	0	0	0	0	0	0	0	0	0
Anacystis marina	1	0	0	0	0	0	0	0	0	0
Anaerobutyricum hallii	1	0	1	0	1	1	0	0	0	0
Anaerococcus hydrogenalis	1	0	0	0	0	0	0	0	0	0
Anaerococcus jeddahensis	1	0	0	0	0	0	0	0	0	0
Anaerococcus mediterraneensis	1	0	1	1	1	0	1	1	0	0
Anaerococcus prevotii	1	1	1	1	1	1	1	0	0	0
Anaerococcus sp. S138	1	0	0	0	0	0	0	0	0	0
Anaerococcus tetradius	1	0	0	0	0	0	0	0	0	0
Anaeroglobus geminatus	1	0	0	0	0	0	0	0	0	0
Anaerohalosphaera lusitana	1	0	0	0	0	0	0	0	0	0
Anaerolineaceae bacterium oral taxon 439	1	0	0	0	0	0	0	0	0	0
Anaeromyxobacter dehalogenans	1	0	1	0	1	0	0	0	0	0
Anaeromyxobacter sp. K	1	0	0	0	1	0	0	0	0	0
Anaerostipes hadrus	1	0	1	0	0	1	0	0	0	0
Anaerostipes rhamnosivorans	1	0	0	0	1	1	0	0	0	0
Anaerotignum propionicum	1	0	0	1	0	0	0	0	0	0
Anaerotruncus colihominis	1	0	0	0	0	0	0	0	0	0
Aneurinibacillus sp. XH2	1	0	0	0	1	0	0	0	0	0
Anoxybacillus amylolyticus	1	0	0	0	0	0	0	0	0	0
Anoxybacillus flavithermus	1	0	1	0	0	0	0	0	0	0
Anoxybacillus rupiensis	1	0	0	0	0	0	0	0	0	0
Anoxybacillus sp. B7M1	1	1	0	0	0	0	0	0	0	1
Antarcticibacterium flavum	1	0	0	0	0	0	0	0	0	0
Aphanizomenon gracile	1	0	0	0	0	0	0	0	0	0
Aquabacterium olei	1	1	1	0	1	1	0	0	0	1
Aquaspirillum sp. LM1	1	0	1	0	0	0	0	0	0	0
Aquiflexum balticum	1	0	0	0	1	0	0	0	0	0
Aquincola sp.	1	0	0	0	0	0	1	0	0	0
Aquitalea sp. USM4	1	0	0	0	1	0	0	0	0	1
Arachidicoccus sp. BS20	1	0	1	0	1	0	0	0	0	0
Arcanobacterium haemolyticum	1	0	0	0	0	0	0	0	0	0
Archangium gephyra	1	0	0	0	0	0	0	0	0	0
Arcobacter suis	1	0	0	0	1	1	0	0	0	0
Arcticibacterium luteifluviistationis	1	0	0	0	0	0	0	0	0	0
Arsenicicoccus sp. oral taxon 190	1	0	0	0	1	1	0	0	0	0
Arthrobacter alpinus	1	0	0	0	1	0	0	0	0	0
Arthrobacter crystallopoietes	1	0	0	0	0	0	0	1	0	1
Arthrobacter davidanieli	1	0	0	0	0	0	0	0	0	0
Arthrobacter sp.	1	0	1	0	1	0	0	1	0	1
Arthrobacter sp. ALBL_147	1	0	0	0	1	0	0	0	0	0
Arthrobacter sp. BSw21447B	1	0	0	0	0	0	0	0	0	0
Arthrobacter sp. PAMC 25486	1	0	0	0	0	0	0	0	0	0
Arthrobacter sp. UKPF54-2	1	0	1	0	0	0	0	0	0	0
Arthrobacter sp. YC-RL1	1	0	1	0	0	0	0	1	0	0
Asaia bogorensis	1	0	0	0	0	0	0	0	0	0
Atopobium parvulum	1	0	0	1	0	1	0	0	0	0
Atopobium vaginae	1	0	0	0	1	0	0	0	0	0
Aurantimicrobium minutum	1	0	0	0	1	0	0	0	0	0
Aurantimicrobium sp.	1	0	0	0	0	0	0	0	0	0
Aurantimicrobium sp. MWH-Mo1	1	0	0	0	0	0	0	0	0	0
Aurantimicrobium sp. MWH-Uga1	1	0	0	0	0	0	0	0	0	0
Auraticoccus monumenti	1	0	1	0	0	0	0	0	0	0
Aureimonas altamirensis	1	0	1	0	1	0	0	0	0	0
Aureimonas frigidaquae	1	0	1	0	0	0	0	0	0	0
Aureimonas sp. AU12	1	0	0	0	0	0	0	0	0	0
Aureimonas sp. AU22	1	0	1	0	0	0	0	0	0	0
Aureimonas sp. D3	1	0	0	0	0	0	0	0	0	0
Auricoccus indicus	1	0	0	0	1	1	0	0	0	0
Auritidibacter sp. NML130574	1	0	0	0	0	0	0	0	0	0
Austwickia chelonae	1	1	0	0	0	0	0	0	0	0
Azoarcus sp. CIB	1	0	1	0	0	0	0	0	0	0
Azoarcus sp. DN11	1	0	1	0	1	0	0	0	0	0
Azospira oryzae	1	0	0	0	0	0	0	0	0	0
Azospira sp.	1	0	0	0	0	0	0	0	0	0
Azospirillum brasilense	1	0	1	1	1	0	0	0	0	0
Azospirillum humicireducens	1	0	1	0	0	0	0	0	0	0
Azospirillum sp. M2T2B2	1	0	0	0	1	0	0	0	0	0
Azospirillum sp. TSA2s	1	0	1	0	0	0	0	1	0	0
Azotobacter chroococcum	1	0	0	0	0	0	0	1	0	0
BTEX-degrading bacterium enrichment culture	1	0	0	0	0	0	0	0	0	0
Bacillaceae bacterium TKL69	1	0	0	0	0	0	0	0	0	0
Bacillus altitudinis	1	0	0	0	0	0	0	0	0	0
Bacillus amyloliquefaciens	1	0	0	0	0	0	0	0	0	0
Bacillus anthracis	1	0	1	0	1	0	0	0	0	0
Bacillus asahii	1	0	0	0	0	0	0	0	0	0
Bacillus cereus	1	0	1	1	1	1	0	1	0	1
Bacillus circulans	1	0	0	0	1	0	0	1	0	0
Bacillus coagulans	1	0	1	0	0	0	0	0	0	0
Bacillus flexus	1	0	0	0	1	0	0	1	0	0
Bacillus halodurans	1	0	0	0	1	1	0	0	0	0
Bacillus horikoshii	1	0	0	0	1	0	0	0	0	0
Bacillus jeotgali	1	0	0	0	0	0	0	0	0	0
Bacillus krulwichiae	1	0	1	1	0	1	0	0	0	0
Bacillus licheniformis	1	0	0	0	1	0	0	1	0	0
Bacillus litoralis	1	0	0	0	0	0	0	1	0	0
Bacillus marisflavi	1	0	0	0	1	0	0	0	0	0
Bacillus megaterium	1	0	0	0	1	0	0	1	0	1
Bacillus mesonae	1	0	0	0	0	0	0	0	0	0
Bacillus mycoides	1	0	1	0	0	0	0	1	0	0
Bacillus niacini	1	0	0	0	0	0	0	0	0	0
Bacillus paranthracis	1	0	0	0	0	0	0	0	0	0
Bacillus pumilus	1	0	0	0	0	0	0	0	0	0
Bacillus shackletonii	1	0	0	0	0	0	0	0	0	0
Bacillus smithii	1	0	0	0	1	0	0	0	0	0
Bacillus sp. (in: Bacteria)	1	0	0	0	0	0	0	0	0	0
Bacillus sp. 1NLA3E	1	0	0	0	0	0	0	0	0	0
Bacillus sp. BD59S	1	0	1	0	0	0	0	1	0	0
Bacillus sp. FJAT-42376	1	0	0	0	0	0	0	0	0	0
Bacillus sp. Y1	1	0	0	0	0	0	0	0	0	1
Bacillus subtilis	1	0	0	0	1	0	1	1	0	0
Bacillus thermoamylovorans	1	0	1	0	1	1	1	1	0	0
Bacillus thermocopriae	1	1	0	0	1	0	0	0	0	0
Bacillus thuringiensis	1	0	0	1	1	1	0	1	0	0
Bacillus tropicus	1	0	0	0	0	1	0	0	0	0
Bacillus trypoxylicola	1	0	0	0	0	0	0	0	0	0
Bacillus vietnamensis	1	0	0	0	0	0	0	0	0	0
Bacteriovorax stolpii	1	0	0	0	1	0	0	0	0	0
Bacteroidales bacterium CF	1	0	0	0	1	0	0	0	0	0
Bacteroides caccae	1	0	0	0	0	0	0	0	0	0
Bacteroides dorei	1	0	1	0	1	0	0	0	0	0
Bacteroides fragilis	1	0	1	1	1	1	0	0	0	0
Bacteroides heparinolyticus	1	0	1	0	1	0	0	0	0	0
Bacteroides intestinalis	1	0	0	1	1	0	0	0	0	0
Bacteroides ovatus	1	0	1	0	0	1	0	0	0	0
Bacteroides salanitronis	1	0	0	1	1	0	0	0	0	0
Bacteroides sp. A1C1	1	0	1	0	0	0	0	0	0	0
Bacteroides sp. KA00344	1	0	0	0	0	0	0	0	0	0
Bacteroides uniformis	1	0	0	0	1	1	0	0	0	0
Bacteroides vulgatus	1	0	1	1	1	1	0	0	0	0
Bacteroides xylanisolvens	1	0	0	0	1	1	0	0	0	0
Bacteroides zoogleoformans	1	0	1	1	0	1	0	0	0	0
Bacteroidetes bacterium UKL13-3	1	0	1	0	1	0	0	0	0	0
Baekduia soli	1	0	1	0	1	1	0	0	0	0
Barnesiella viscericola	1	0	1	0	1	0	0	0	0	0
Bartonella ancashensis	1	0	0	0	0	0	0	0	0	0
Bartonella krasnovii	1	0	0	0	0	0	0	0	0	0
Bdellovibrio bacteriovorus	1	1	1	0	1	1	0	0	0	0
Bdellovibrio exovorus	1	0	0	0	1	0	0	0	0	0
Bdellovibrio sp. NC01	1	0	0	0	1	0	0	0	0	0
Bdellovibrio sp. S1	1	0	0	0	0	0	0	0	0	0
Bdellovibrio sp. ZAP7	1	1	0	0	1	0	0	0	0	0
Bdellovibrio sp. qaytius	1	0	0	1	1	0	0	0	0	0
Beggiatoa leptomitoformis	1	0	0	0	0	0	0	0	0	0
Beijerinckiaceae bacterium	1	0	0	0	0	0	0	0	0	0
Beijerinckiaceae bacterium RH AL1	1	0	0	0	0	0	0	0	0	0
Bernardetia litoralis	1	0	0	0	1	0	0	0	0	0
Betaproteobacteria bacterium	1	0	0	0	0	0	0	0	0	0
Bibersteinia trehalosi	1	0	0	0	0	0	0	0	0	0
Bifidobacterium actinocoloniiforme	1	0	0	0	0	0	0	1	0	0
Bifidobacterium adolescentis	1	0	1	0	0	1	0	0	0	0
Bifidobacterium angulatum	1	0	0	0	0	0	0	1	0	0
Bifidobacterium animalis	1	1	1	0	0	0	0	0	0	0
Bifidobacterium asteroides	1	0	0	0	0	0	0	0	0	0
Bifidobacterium bifidum	1	0	1	0	0	0	0	0	0	0
Bifidobacterium breve	1	0	1	0	0	0	0	0	0	0
Bifidobacterium catenulatum	1	0	1	1	0	1	0	0	0	0
Bifidobacterium choerinum	1	0	1	0	0	0	0	1	0	0
Bifidobacterium coryneforme	1	0	0	0	0	0	0	0	0	0
Bifidobacterium gallinarum	1	0	0	0	0	0	0	0	0	0
Bifidobacterium longum	1	0	1	1	1	1	0	1	0	0
Bifidobacterium minimum	1	0	0	0	0	0	0	0	0	0
Bifidobacterium mongoliense	1	0	0	0	0	0	0	0	0	0
Bifidobacterium pseudocatenulatum	1	1	1	1	0	0	0	0	0	0
Bifidobacterium pseudolongum	1	0	1	0	0	0	0	0	0	0
Bifidobacterium scardovii	1	0	0	0	0	0	0	0	0	0
Bifidobacterium sp.	1	1	1	0	0	0	0	0	0	0
Bifidobacterium sp. CW1175_b	1	0	0	0	0	0	0	0	0	0
Bifidobacterium subtile	1	0	0	0	0	0	0	0	0	0
Bifidobacterium thermacidophilum	1	0	0	0	0	0	0	0	0	0
Bifidobacterium thermophilum	1	0	0	0	0	0	0	1	0	0
Blastochloris tepida	1	0	0	0	0	0	0	0	0	0
Blastococcus aggregatus	1	0	1	0	0	0	0	0	0	1
Blastococcus saxobsidens	1	0	1	0	1	0	0	0	0	1
Blastococcus sp.	1	0	1	0	1	0	0	0	0	0
Blattabacterium clevelandi	1	0	0	0	1	0	0	0	0	0
Blautia coccoides	1	0	0	0	0	0	0	0	0	0
Blautia obeum	1	0	1	0	0	0	0	0	0	0
Blautia sp. N6H1-15	1	0	0	0	1	0	0	1	0	0
Blautia sp. SC05B48	1	1	1	0	1	1	0	0	0	0
Blautia wexlerae	1	0	0	0	0	0	0	0	0	0
Bordetella bronchiseptica	1	0	0	0	1	0	0	1	0	0
Bordetella genomosp. 13	1	0	0	0	0	0	0	1	0	0
Bordetella hinzii	1	0	0	0	0	0	0	1	0	0
Bordetella parapertussis	1	0	0	0	1	0	0	0	0	0
Bordetella petrii	1	0	1	0	0	0	0	0	0	0
Bordetella sp. A2-436	1	0	0	0	0	0	0	0	0	0
Bordetella sp. N	1	0	1	0	1	0	0	0	0	0
Bordetella trematum	1	0	0	0	1	0	0	0	0	0
Bosea sp. AS-1	1	0	1	0	0	0	0	0	0	0
Bosea sp. Tri-49	1	0	0	0	0	0	0	0	0	0
Brachybacterium faecium	1	0	1	0	0	0	0	1	0	0
Brachybacterium ginsengisoli	1	1	0	0	1	0	0	1	0	1
Brachybacterium paraconglomeratum	1	0	0	0	0	0	0	0	0	0
Brachybacterium saurashtrense	1	0	0	0	0	0	0	1	0	0
Brachybacterium sp.	1	0	0	0	0	0	0	0	0	0
Brachybacterium sp. P6-10-X1	1	0	0	0	0	0	0	1	0	0
Brachybacterium sp. SGAir0954	1	0	1	0	1	0	0	1	0	0
Brachybacterium sp. VM2412	1	0	0	0	1	0	0	0	0	0
Brachybacterium sp. VR2415	1	0	0	0	0	0	0	1	0	0
Brachyspira hampsonii	1	0	0	0	1	0	0	0	0	0
Bradyrhizobium denitrificans	1	0	0	0	0	0	0	0	0	0
Bradyrhizobium erythrophlei	1	0	1	0	0	0	0	1	0	0
Bradyrhizobium guangdongense	1	0	1	0	0	0	0	0	0	0
Bradyrhizobium lablabi	1	0	1	0	1	0	0	1	0	0
Bradyrhizobium sp.	1	1	1	0	0	0	0	1	0	0
Bradyrhizobium sp. KBS0727	1	0	0	0	1	0	0	0	0	0
Bradyrhizobium sp. OHSU_III	1	0	0	0	0	0	0	0	0	0
Bradyrhizobium sp. ORS 285	1	1	1	0	1	0	0	1	0	0
Bradyrhizobium sp. ORS 3257	1	0	0	0	0	0	0	0	0	0
Bradyrhizobium sp. S23321	1	0	1	0	0	0	0	1	0	0
Bradyrhizobium sp. SK17	1	1	1	0	1	1	0	1	0	0
Bradyrhizobium sp. WD16	1	0	0	0	0	0	0	0	0	0
Bradyrhizobium zhanjiangense	1	0	1	1	0	1	0	1	0	0
Bremerella volcania	1	0	0	0	0	0	0	0	0	0
Brevibacillus brevis	1	0	0	0	1	0	0	0	0	0
Brevibacillus sp. SCSIO 07484	1	0	0	0	0	0	0	0	0	0
Brevibacterium aurantiacum	1	0	1	0	0	0	0	1	0	0
Brevibacterium casei	1	0	0	0	0	0	0	0	0	0
Brevibacterium linens	1	1	1	0	1	0	0	0	0	0
Brevibacterium ravenspurgense	1	0	0	0	0	0	0	0	0	0
Brevibacterium sp. CS2	1	0	1	0	1	0	0	1	0	0
Brevundimonas bullata	1	0	0	0	0	0	0	0	0	1
Brevundimonas diminuta	1	0	1	0	0	0	0	1	0	0
Brevundimonas naejangsanensis	1	1	1	0	1	0	0	1	0	1
Brevundimonas sp.	1	0	0	0	0	0	0	0	0	0
Brevundimonas sp. ALBL_027	1	0	0	0	1	0	0	0	0	1
Brevundimonas sp. DS20	1	0	1	0	0	0	0	0	0	0
Brevundimonas sp. GW460-12-10-14-LB2	1	0	1	0	0	0	0	0	0	0
Brevundimonas sp. M20	1	1	0	1	0	1	0	0	0	0
Brevundimonas sp. SGAir0440	1	1	1	0	1	0	0	1	0	0
Brevundimonas vancanneytii	1	0	1	0	0	0	0	0	0	0
Brevundimonas vesicularis	1	0	1	0	0	0	0	0	0	1
Brochothrix thermosphacta	1	1	1	0	1	0	0	0	0	0
Buchnera aphidicola	1	0	1	0	1	0	0	0	0	0
Burkholderia ambifaria	1	0	0	0	0	0	0	1	0	0
Burkholderia cenocepacia	1	1	1	0	1	0	0	1	0	0
Burkholderia cepacia	1	0	0	0	0	0	0	1	0	0
Burkholderia contaminans	1	1	1	0	1	0	0	1	0	0
Burkholderia glumae	1	0	0	0	0	0	0	0	0	0
Burkholderia lata	1	0	1	0	0	0	0	0	0	0
Burkholderia latens	1	0	1	0	1	0	0	0	0	0
Burkholderia metallica	1	0	0	0	0	0	0	0	0	0
Burkholderia multivorans	1	0	1	1	1	1	0	1	0	0
Burkholderia oklahomensis	1	0	0	0	0	0	0	0	0	0
Burkholderia pseudomallei	1	0	0	0	1	0	0	0	0	0
Burkholderia pseudomultivorans	1	0	0	0	0	0	0	0	0	0
Burkholderia pyrrocinia	1	0	0	0	0	0	0	0	0	0
Burkholderia sp.	1	0	0	0	0	0	0	0	0	0
Burkholderia sp. AD24	1	0	0	0	0	0	0	0	0	0
Burkholderia sp. DHOD12	1	0	1	0	1	0	0	0	0	0
Burkholderia sp. IDO3	1	0	1	0	0	0	0	0	0	0
Burkholderia sp. JP2-270	1	0	0	0	0	0	0	0	0	0
Burkholderia sp. KBS0801	1	1	0	0	0	0	0	1	0	0
Burkholderia sp. LA-2-3-30-S1-D2	1	0	0	0	0	0	0	0	0	0
Burkholderia sp. OLGA172	1	0	0	0	1	0	0	0	0	0
Burkholderia sp. PAMC 26561	1	0	0	0	0	0	0	0	0	0
Burkholderia sp. wp26	1	0	0	0	0	0	0	0	0	0
Burkholderia stabilis	1	0	1	0	0	1	0	1	0	0
Burkholderia thailandensis	1	0	0	0	1	0	0	0	0	0
Burkholderia vietnamiensis	1	0	1	0	1	0	0	1	0	0
Burkholderiales bacterium GJ-E10	1	0	0	0	0	0	0	0	0	0
Butyrivibrio hungatei	1	0	0	0	0	0	0	0	0	0
Caedimonas varicaedens	1	0	0	0	0	0	0	0	0	0
Caldicellulosiruptor lactoaceticus	1	0	0	0	0	0	0	0	0	0
Caldilinea aerophila	1	0	0	0	0	0	0	0	0	0
Caldimicrobium thiodismutans	1	0	0	0	0	0	0	0	0	0
Caldisericum exile	1	0	0	0	1	0	0	0	0	0
Caldithrix abyssi	1	0	0	0	0	0	0	0	0	0
Caloramator sp. E03	1	0	1	0	1	0	0	0	0	0
Calothrix parasitica	1	0	0	0	1	0	0	0	0	0
Caminibacter mediatlanticus	1	0	0	0	0	0	0	0	0	0
Campylobacter concisus	1	0	0	1	0	1	0	0	0	0
Campylobacter cuniculorum	1	0	0	0	0	0	0	0	0	0
Campylobacter curvus	1	0	0	0	0	1	0	0	0	0
Campylobacter fetus	1	0	0	1	0	1	0	0	0	0
Campylobacter hominis	1	0	0	0	0	0	0	0	0	0
Campylobacter lanienae	1	0	0	0	0	0	0	0	0	0
Campylobacter rectus	1	0	0	0	0	0	0	0	0	1
Campylobacter showae	1	0	1	1	1	1	0	0	0	1
Campylobacter ureolyticus	1	0	0	0	1	0	0	0	0	0
Candidatus Aquiluna sp. UB-MaderosW2red	1	0	0	0	1	0	0	0	0	0
Candidatus Azobacteroides pseudotrichonymphae	1	0	0	0	0	0	0	0	0	0
Candidatus Campbellbacteria bacterium GW2011_OD1_34_28	1	0	0	0	1	0	0	0	0	0
Candidatus Dependentiae bacterium (ex Spumella elongata CCAP 955/1)	1	0	0	0	1	0	0	0	0	0
Candidatus Filomicrobium marinum	1	0	0	0	0	0	0	0	0	1
Candidatus Fluviicola riflensis	1	0	1	0	1	0	0	0	0	0
Candidatus Fokinia solitaria	1	0	0	0	0	0	0	0	0	0
Candidatus Fukatsuia symbiotica	1	0	0	0	0	0	0	0	0	0
Candidatus Gracilibacteria bacterium HOT-871	1	0	0	0	1	1	0	0	0	0
Candidatus Magnetococcus massalia	1	0	0	0	1	0	0	0	0	0
Candidatus Melainabacteria bacterium MEL.A1	1	0	0	0	1	0	0	0	0	0
Candidatus Methylopumilus turicensis	1	0	0	0	1	0	0	0	0	0
Candidatus Nitrotoga sp. AM1	1	0	0	0	0	0	0	0	0	0
Candidatus Paracaedimonas acanthamoebae	1	0	1	0	0	0	0	0	0	0
Candidatus Peribacter riflensis	1	0	0	0	1	0	0	0	0	0
Candidatus Phycorickettsia trachydisci	1	0	0	0	1	0	0	0	0	0
Candidatus Phytoplasma australiense	1	0	0	0	1	0	0	0	0	0
Candidatus Planktophila dulcis	1	0	0	0	1	0	0	0	0	0
Candidatus Planktophila lacus	1	0	0	0	1	1	0	0	0	0
Candidatus Planktophila limnetica	1	0	0	0	1	0	0	0	0	0
Candidatus Planktophila sulfonica	1	0	0	1	1	1	0	0	0	0
Candidatus Planktophila vernalis	1	0	0	0	1	0	0	0	0	0
Candidatus Planktophila versatilis	1	0	0	0	1	0	0	0	0	0
Candidatus Protochlamydia amoebophila	1	0	0	0	0	0	0	0	0	0
Candidatus Purcelliella pentastirinorum	1	0	0	0	0	0	0	0	0	0
Candidatus Rhodoluna limnophila	1	0	0	1	1	1	0	0	0	0
Candidatus Rhodoluna planktonica	1	0	0	0	0	0	0	1	0	0
Candidatus Saccharibacteria bacterium	1	0	0	0	1	0	0	0	0	0
Candidatus Saccharibacteria bacterium GW2011_GWC2_44_17	1	0	0	0	1	0	0	0	0	0
Candidatus Saccharibacteria bacterium YM_S32_TM7_50_20	1	0	0	0	1	0	0	0	0	0
Candidatus Solibacter usitatus	1	0	1	0	0	0	0	0	0	0
Candidatus Tenderia electrophaga	1	0	1	0	0	0	0	0	0	0
Capnocytophaga canimorsus	1	1	0	0	1	0	0	0	0	0
Capnocytophaga gingivalis	1	0	1	1	1	0	0	0	0	1
Capnocytophaga leadbetteri	1	0	0	1	1	1	0	0	0	1
Capnocytophaga ochracea	1	0	0	1	0	1	0	0	0	0
Capnocytophaga sp. oral taxon 864	1	0	0	0	0	0	0	0	0	0
Capnocytophaga sp. oral taxon 878	1	0	0	0	0	0	0	0	0	0
Capnocytophaga sputigena	1	0	1	0	1	1	0	0	0	0
Carboxydocella thermautotrophica	1	0	0	0	0	0	0	0	0	0
Cardiobacterium hominis	1	0	1	0	1	0	0	0	0	0
Carnobacterium inhibens	1	0	0	0	1	0	0	0	0	0
Carnobacterium maltaromaticum	1	1	1	0	0	0	0	0	0	0
Carnobacterium sp. 17-4	1	0	0	0	0	0	0	0	0	0
Castellaniella defragrans	1	0	0	0	0	0	0	0	0	0
Catenulispora acidiphila	1	0	0	0	0	0	0	1	0	0
Caulobacter flavus	1	0	0	0	0	0	0	1	0	0
Caulobacter mirabilis	1	0	1	0	1	0	0	1	0	0
Caulobacter sp. FWC26	1	1	1	0	1	0	0	1	0	1
Caulobacter sp. K31	1	0	0	0	0	0	0	1	0	0
Caulobacter vibrioides	1	0	1	0	0	1	0	1	0	1
Caulobacteraceae bacterium OTSz_A_272	1	0	0	0	0	0	0	0	0	0
Celeribacter manganoxidans	1	0	0	0	0	1	0	0	0	0
Cellulomonas fimi	1	0	0	0	0	0	0	0	0	0
Cellulomonas flavigena	1	0	0	0	1	0	0	1	0	0
Cellulomonas gilvus	1	0	0	0	0	0	0	0	0	0
Cellulomonas shaoxiangyii	1	0	1	1	1	0	0	0	0	0
Cellulophaga baltica	1	0	0	0	1	0	0	0	0	0
Cellulosimicrobium cellulans	1	0	0	0	0	0	0	1	0	0
Cellvibrio sp. PSBB006	1	0	0	0	1	0	0	0	0	0
Cellvibrio sp. PSBB023	1	0	0	0	1	0	0	0	0	0
Chamaesiphon minutus	1	0	0	0	0	0	0	0	0	0
Chelatococcus composti	1	0	0	0	0	0	0	1	0	0
Chelatococcus daeguensis	1	0	0	0	0	0	0	1	0	1
Chelatococcus sp. CO-6	1	0	1	0	0	0	0	0	0	0
Chitinimonas sp. R3-44	1	0	0	0	1	0	0	0	0	0
Chitinophaga pinensis	1	0	1	0	1	0	0	0	0	0
Chitinophaga sp. MD30	1	0	0	0	0	0	0	0	0	0
Chloracidobacterium thermophilum	1	0	0	0	1	0	0	0	0	0
Chloroflexus aurantiacus	1	0	0	0	1	0	0	0	0	0
Chondrocystis sp. NIES-4102	1	0	0	0	1	0	0	0	0	0
Chondromyces crocatus	1	0	0	1	1	1	0	0	0	0
Chromatocurvus sp.	1	0	0	0	0	0	0	0	0	0
Chromobacterium rhizoryzae	1	0	0	0	1	0	0	0	0	0
Chromobacterium sp.	1	0	0	0	0	0	0	0	0	0
Chromobacterium sp. 146	1	0	0	0	0	0	0	0	0	0
Chromobacterium violaceum	1	0	1	0	0	0	0	0	0	0
Chroococcidiopsis thermalis	1	0	0	0	0	0	0	0	0	0
Chryseobacterium arthrosphaerae	1	0	1	0	1	0	0	0	0	0
Chryseobacterium bernardetii	1	0	1	0	0	0	0	0	0	0
Chryseobacterium carnipullorum	1	0	0	0	1	0	0	0	0	1
Chryseobacterium gleum	1	0	1	0	1	0	0	0	0	1
Chryseobacterium haifense	1	0	1	0	1	0	0	0	0	0
Chryseobacterium indologenes	1	0	1	0	0	0	0	0	0	1
Chryseobacterium lactis	1	0	0	0	1	0	0	0	0	1
Chryseobacterium rhizosphaerae	1	0	0	0	0	0	0	0	0	0
Chryseobacterium shandongense	1	0	0	0	1	0	0	0	0	0
Chryseobacterium sp. 17S1E7	1	0	0	0	1	0	0	0	0	0
Chryseobacterium sp. F5649	1	0	1	0	1	0	0	0	0	0
Chryseobacterium sp. G0162	1	0	1	0	1	0	0	0	0	0
Chryseobacterium sp. G0186	1	0	0	0	0	0	0	0	0	0
Chryseobacterium sp. G0201	1	0	0	0	0	0	0	0	0	1
Chryseobacterium sp. H3001	1	0	1	0	1	0	0	0	0	0
Chryseobacterium sp. H6466	1	0	1	0	1	0	1	1	0	0
Chryseobacterium sp. IHB B 17019	1	0	0	0	1	0	0	0	0	0
Chryseobacterium ureilyticum	1	0	0	0	0	0	0	0	0	0
Chryseolinea soli	1	0	1	0	1	0	0	0	0	0
Chthoniobacter flavus	1	0	1	0	1	0	0	0	0	0
Chthonomonas calidirosea	1	0	0	0	0	0	0	0	0	0
Ciceribacter sp.	1	0	0	0	0	0	0	0	0	0
Citricoccus sp. SGAir0253	1	0	1	0	1	0	0	1	0	0
Citrobacter freundii	1	0	1	0	1	0	0	0	0	0
Citrobacter koseri	1	0	0	0	0	0	0	0	0	0
Citrobacter sp. 92	1	0	0	0	0	0	0	0	0	0
Cloacibacillus porcorum	1	0	0	0	0	0	0	0	0	0
Cloacibacterium normanense	1	1	1	1	1	1	0	1	0	1
Clostridiales bacterium	1	0	0	0	0	0	0	0	0	0
Clostridioides difficile	1	0	1	0	0	0	0	0	0	0
Clostridium aceticum	1	0	0	0	1	0	0	0	0	0
Clostridium acetobutylicum	1	0	0	0	0	0	0	0	0	0
Clostridium argentinense	1	0	0	0	0	0	0	0	0	0
Clostridium autoethanogenum	1	0	0	0	0	1	0	0	0	0
Clostridium baratii	1	0	0	0	0	0	0	0	0	0
Clostridium beijerinckii	1	0	1	0	0	0	0	0	0	0
Clostridium botulinum	1	1	1	0	1	1	0	1	0	0
Clostridium carboxidivorans	1	0	0	0	1	0	0	0	0	0
Clostridium chauvoei	1	0	0	0	1	0	0	0	0	0
Clostridium drakei	1	0	0	0	0	0	0	0	0	0
Clostridium estertheticum	1	0	0	0	1	0	0	0	0	0
Clostridium isatidis	1	0	0	0	0	0	0	0	0	0
Clostridium pasteurianum	1	0	0	0	0	0	0	0	0	0
Clostridium perfringens	1	0	1	1	1	1	0	0	0	0
Clostridium saccharobutylicum	1	0	0	0	1	0	0	0	0	0
Clostridium sp. BNL1100	1	0	0	0	1	0	0	0	0	0
Clostridium sp. JN-9	1	0	0	0	1	0	0	0	0	0
Clostridium sp. SY8519	1	0	0	0	0	0	0	0	0	0
Clostridium sp. SYSU GA15002T	1	0	0	0	0	0	0	1	0	0
Clostridium sp. WSC-9-7	1	0	0	0	0	0	0	0	0	0
Clostridium tetani	1	0	0	0	1	0	0	1	0	0
Cobetia sp.	1	0	0	0	0	0	0	0	0	0
Coelomoron pusillum	1	0	0	0	0	0	0	0	0	0
Coelosphaerium sp. G3	1	0	0	0	0	0	0	0	0	0
Cohnella abietis	1	0	0	0	1	0	0	0	0	0
Collimonas arenae	1	0	1	0	1	0	0	0	0	0
Collimonas pratensis	1	0	0	1	1	0	0	0	0	0
Collinsella aerofaciens	1	0	0	0	0	1	0	0	0	0
Comamonas sp. ALBL_228	1	0	0	1	0	1	0	0	0	0
Comamonas sp. NLF-7-7	1	0	1	0	1	0	0	0	0	0
Comamonas terrigena	1	0	1	0	0	0	0	1	0	1
Comamonas testosteroni	1	0	1	1	1	1	0	0	0	1
Comamonas thiooxydans	1	0	0	1	0	0	0	0	0	0
Conchiformibius steedae	1	0	0	0	1	0	0	0	0	0
Conexibacter woesei	1	0	1	1	1	0	0	0	0	0
Congregibacter litoralis	1	0	0	0	0	0	0	0	0	0
Coprococcus catus	1	0	0	0	1	1	0	0	0	0
Coprococcus sp. ART55/1	1	0	0	0	1	0	0	0	0	1
Corallococcus coralloides	1	0	1	0	1	0	0	0	0	0
Coriobacteriaceae bacterium 68-1-3	1	0	0	0	1	0	0	0	0	0
Coriobacteriales bacterium DNF00809	1	0	0	0	0	0	0	0	0	0
Coriobacterium glomerans	1	1	0	0	0	0	0	0	0	0
Corynebacteriaceae bacterium 'ARUP UnID 227'	1	0	1	1	1	1	0	1	0	0
Corynebacterium ammoniagenes	1	0	0	0	0	0	0	0	0	0
Corynebacterium atypicum	1	0	0	0	0	0	0	0	0	0
Corynebacterium aurimucosum	1	0	1	0	1	1	0	0	0	0
Corynebacterium camporealensis	1	0	1	1	1	1	0	1	0	0
Corynebacterium casei	1	0	0	0	0	0	0	0	0	0
Corynebacterium diphtheriae	1	0	1	0	1	1	0	1	0	0
Corynebacterium doosanense	1	0	0	0	0	1	0	0	0	0
Corynebacterium efficiens	1	0	0	0	0	0	0	1	0	0
Corynebacterium epidermidicanis	1	0	0	0	0	0	0	0	0	0
Corynebacterium falsenii	1	0	0	0	1	1	0	1	0	0
Corynebacterium frankenforstense	1	0	1	0	0	0	0	1	0	0
Corynebacterium glaucum	1	0	1	1	1	0	0	0	0	0
Corynebacterium glutamicum	1	0	0	0	1	0	0	1	0	0
Corynebacterium glyciniphilum	1	0	0	0	0	0	0	0	0	0
Corynebacterium halotolerans	1	0	1	0	0	0	0	1	0	0
Corynebacterium humireducens	1	0	1	0	0	0	0	1	0	0
Corynebacterium imitans	1	0	1	0	1	1	0	1	0	0
Corynebacterium jeikeium	1	1	1	0	1	1	0	1	0	0
Corynebacterium kroppenstedtii	1	1	1	0	1	1	1	0	0	0
Corynebacterium kutscheri	1	0	0	0	0	1	0	1	0	0
Corynebacterium lactis	1	0	1	0	1	0	0	1	0	0
Corynebacterium maris	1	0	0	0	0	0	0	1	0	0
Corynebacterium matruchotii	1	1	1	0	1	1	0	1	0	1
Corynebacterium mycetoides	1	0	0	0	0	0	0	1	0	0
Corynebacterium nuruki	1	0	0	0	1	0	0	0	0	0
Corynebacterium phocae	1	0	0	0	0	1	0	0	0	0
Corynebacterium propinquum	1	0	0	0	0	0	0	0	0	0
Corynebacterium pseudopelargi	1	0	0	0	0	0	0	0	0	0
Corynebacterium pseudotuberculosis	1	0	0	0	1	0	0	0	0	0
Corynebacterium renale	1	0	0	0	1	0	0	0	0	0
Corynebacterium resistens	1	0	1	0	1	0	0	0	0	0
Corynebacterium riegelii	1	0	0	0	1	0	1	0	0	0
Corynebacterium sanguinis	1	0	1	0	1	0	0	0	0	0
Corynebacterium segmentosum	1	1	1	1	1	1	1	1	0	1
Corynebacterium simulans	1	0	0	0	1	0	0	1	0	0
Corynebacterium singulare	1	0	1	0	1	1	0	1	0	0
Corynebacterium sp.	1	0	0	0	1	0	0	0	0	0
Corynebacterium sp. 2183	1	0	0	0	0	0	0	0	0	0
Corynebacterium sp. 2184	1	0	0	0	1	0	0	0	0	0
Corynebacterium sp. ATCC 6931	1	0	0	0	1	0	0	0	0	0
Corynebacterium sp. L2-79-05	1	0	0	0	0	0	0	0	0	0
Corynebacterium sp. NML00-0179	1	0	0	0	0	0	0	0	0	0
Corynebacterium sp. NML98-0116	1	0	0	1	1	0	0	0	0	0
Corynebacterium sp. sy039	1	0	0	0	1	0	0	0	0	0
Corynebacterium stationis	1	0	0	0	1	0	0	0	0	0
Corynebacterium striatum	1	0	0	0	1	1	0	1	0	1
Corynebacterium timonense	1	0	0	1	0	0	0	1	0	0
Corynebacterium tuberculostearicum	1	0	0	0	0	0	0	0	0	0
Corynebacterium ulcerans	1	0	1	0	1	1	1	1	0	1
Corynebacterium urealyticum	1	0	0	0	0	0	0	1	0	0
Corynebacterium ureicelerivorans	1	0	1	1	1	1	0	0	0	0
Corynebacterium variabile	1	0	1	0	1	0	0	0	0	0
Corynebacterium vitaeruminis	1	0	0	0	1	0	0	1	0	0
Corynebacterium xerosis	1	0	0	0	1	0	0	1	0	0
Coxiella-like endosymbiont of Amblyomma americanum	1	0	0	0	0	0	0	0	0	0
Crateriforma conspicua	1	0	0	0	0	0	0	0	0	0
Craurococcus sp. HM28-1	1	0	0	0	0	0	0	0	0	0
Criblamydia sequanensis	1	0	0	0	0	0	0	0	0	0
Croceicoccus marinus	1	0	1	0	0	0	0	0	0	0
Cronobacter turicensis	1	0	0	0	0	0	0	0	0	0
Cryobacterium sp. GCJ02	1	0	0	0	1	0	0	1	0	0
Cryptobacterium curtum	1	0	0	0	0	0	0	0	0	0
Cupriavidus basilensis	1	0	1	0	0	0	0	0	0	1
Cupriavidus gilardii	1	1	1	0	1	0	1	0	0	1
Cupriavidus metallidurans	1	1	1	0	1	0	0	1	0	0
Cupriavidus nantongensis	1	0	0	0	0	0	0	0	0	0
Cupriavidus necator	1	0	1	0	1	0	0	0	0	0
Cupriavidus sp.	1	0	1	0	0	0	0	0	0	0
Cupriavidus sp. USMAA2-4	1	0	1	0	1	0	0	1	0	0
Cupriavidus taiwanensis	1	0	1	0	1	1	0	1	0	1
Curtobacterium sp. 9128	1	0	0	1	0	0	0	0	0	0
Curtobacterium sp. SGAir0471	1	0	0	0	0	0	0	0	0	0
Curvibacter sp. AEP1-3	1	0	0	0	1	0	0	0	0	0
Cutibacterium acnes	1	1	1	1	1	1	1	1	0	1
Cutibacterium avidum	1	1	1	0	0	1	0	1	0	0
Cutibacterium granulosum	1	1	1	1	1	1	1	0	0	0
Cyanocystis violacea	1	0	0	0	0	0	0	0	0	0
Cycloclasticus sp. PY97N	1	0	0	0	0	0	0	0	0	0
Cylindrospermopsis raciborskii	1	0	0	0	0	0	0	0	0	0
Cystobacter fuscus	1	0	1	0	1	0	0	0	0	0
Cytophaga hutchinsonii	1	0	0	0	1	0	0	0	0	0
Cytophagaceae bacterium	1	0	0	0	0	0	0	0	0	0
Cytophagales bacterium TFI 002	1	0	0	0	1	0	0	0	0	0
Dechloromonas aromatica	1	0	1	0	1	0	0	0	0	0
Dechloromonas sp. HYN0024	1	0	1	0	1	0	0	0	0	0
Dechlorospirillum sp. DB	1	0	0	0	0	0	0	0	0	0
Dehalococcoides mccartyi	1	0	0	0	1	0	0	0	0	0
Deinococcus citri	1	0	0	0	0	0	0	0	0	0
Deinococcus ficus	1	0	0	1	0	0	0	0	0	0
Deinococcus gobiensis	1	0	1	0	1	0	0	1	0	0
Deinococcus metallilatus	1	0	1	0	1	0	0	1	0	0
Deinococcus proteolyticus	1	0	0	0	0	0	0	0	0	0
Deinococcus puniceus	1	0	1	1	1	1	0	1	0	0
Deinococcus radiopugnans	1	0	0	0	0	0	0	0	0	0
Deinococcus sp.	1	0	0	0	0	0	0	0	0	0
Deinococcus sp. NW-56	1	0	1	0	1	1	0	1	0	0
Deinococcus swuensis	1	0	1	1	1	1	0	1	0	0
Deinococcus wulumuqiensis	1	0	1	0	0	0	0	1	0	0
Delftia acidovorans	1	0	1	0	1	0	0	1	0	0
Delftia lacustris	1	0	0	0	0	0	0	0	0	0
Delftia sp. HK171	1	0	1	0	1	0	0	0	0	0
Delftia tsuruhatensis	1	0	1	0	1	0	1	0	0	0
Denitratisoma sp. DHT3	1	0	1	0	1	0	0	0	0	0
Dermabacter hominis	1	0	0	0	1	0	0	1	0	0
Dermabacter jinjuensis	1	0	0	0	0	0	0	0	0	0
Dermacoccus nishinomiyaensis	1	1	0	0	1	1	0	1	0	0
Dermacoccus sp.	1	0	0	0	0	0	0	0	0	0
Desulfarculus baarsii	1	0	0	0	0	0	0	0	0	0
Desulfitobacterium hafniense	1	0	0	0	0	0	0	0	0	0
Desulfitobacterium metallireducens	1	0	0	0	0	0	0	0	0	0
Desulfobacter hydrogenophilus	1	0	0	0	0	0	0	0	0	0
Desulfocapsa sulfexigens	1	0	0	0	0	0	0	0	0	0
Desulfococcus oleovorans	1	0	0	0	1	0	0	0	0	0
Desulfoglaeba alkanexedens	1	0	0	0	0	0	0	0	0	0
Desulfohalobium retbaense	1	0	0	0	0	0	0	0	0	0
Desulfotomaculum reducens	1	0	0	0	1	0	0	0	0	0
Desulfotomaculum ruminis	1	0	0	0	1	0	0	0	0	0
Desulfovibrio desulfuricans	1	0	0	0	1	0	0	0	0	0
Desulfovibrio ferrophilus	1	0	0	0	0	0	0	0	0	0
Desulfovibrio magneticus	1	0	1	0	0	0	0	0	0	0
Desulfuromonas sp. DDH964	1	0	0	0	1	0	0	0	0	0
Devosia ginsengisoli	1	0	0	0	0	1	0	0	0	0
Devosia sp. 1566	1	0	0	0	0	0	0	0	0	0
Devosia sp. I507	1	0	1	0	1	0	0	0	0	0
Dialister hominis	1	0	0	0	1	0	0	0	0	0
Dialister massiliensis	1	0	0	0	0	0	0	0	0	0
Dialister micraerophilus	1	0	0	0	0	0	0	0	0	0
Dialister pneumosintes	1	0	0	1	1	0	0	0	0	0
Diaphorobacter polyhydroxybutyrativorans	1	1	1	1	1	1	0	1	0	1
Diaphorobacter sp.	1	0	0	0	0	0	0	0	0	0
Dictyoglomus thermophilum	1	0	0	0	1	0	0	0	0	0
Dietzia cinnamea	1	0	0	0	0	0	0	0	0	0
Dietzia maris	1	0	0	0	0	0	0	0	0	0
Dietzia psychralcaliphila	1	0	1	0	1	0	0	1	0	0
Dietzia sp. JS16-p6b	1	0	1	0	1	0	0	0	0	0
Dinoroseobacter shibae	1	0	0	1	0	1	0	0	0	0
Dokdonella koreensis	1	0	0	0	0	0	0	0	0	0
Dolosigranulum pigrum	1	1	1	1	1	1	0	1	0	0
Draconibacterium orientale	1	0	0	0	0	0	0	0	0	0
Duncaniella sp. B8	1	1	0	0	1	0	0	0	0	0
Dyadobacter fermentans	1	0	1	0	1	1	0	0	0	0
Dyadobacter sp. 32	1	0	0	0	1	0	0	0	0	0
Dyella thiooxydans	1	0	1	0	0	0	0	0	0	0
Dysosmobacter welbionis	1	0	0	1	0	1	0	0	0	0
Echinicola vietnamensis	1	0	0	0	0	0	0	0	0	0
Eggerthella lenta	1	0	0	1	0	0	0	0	0	0
Eggerthella sp. YY7918	1	0	0	0	1	0	0	0	0	0
Egicoccus halophilus	1	0	0	0	0	0	0	0	0	0
Ehrlichia ruminantium	1	0	0	0	0	0	0	0	0	0
Eikenella corrodens	1	0	1	0	0	0	0	0	0	1
Eikenella exigua	1	0	0	0	1	0	0	0	0	0
Elizabethkingia bruuniana	1	1	1	0	1	0	0	0	0	0
Elizabethkingia meningoseptica	1	0	0	0	1	0	0	0	0	0
Elizabethkingia miricola	1	0	0	0	1	0	0	0	0	0
Elizabethkingia sp. 2-6	1	0	0	0	1	1	0	0	0	0
Elizabethkingia sp. JS20170427COW	1	0	1	0	1	0	0	0	0	0
Emticicia oligotrophica	1	0	0	0	1	0	0	0	0	0
Endomicrobium proavitum	1	0	0	0	0	0	0	0	0	0
Ensifer adhaerens	1	0	0	0	0	0	0	0	0	0
Enterobacter asburiae	1	0	1	0	0	0	0	0	0	0
Enterobacter cancerogenus	1	0	0	0	0	0	0	0	0	0
Enterobacter cloacae complex sp.	1	0	0	0	0	0	0	0	0	0
Enterobacter hormaechei	1	1	1	0	0	0	1	1	0	0
Enterobacter kobei	1	0	0	0	0	0	0	1	0	0
Enterobacter sp.	1	0	0	0	0	0	0	0	0	0
Enterobacter sp. 18A13	1	0	0	0	0	0	0	0	0	0
Enterobacter sp. BND-R12	1	0	0	0	0	0	0	0	0	0
Enterobacter sp. SA187	1	0	0	0	0	0	0	0	0	0
Enterococcus casseliflavus	1	0	0	0	1	0	0	0	0	0
Enterococcus cecorum	1	0	0	0	1	1	0	1	0	0
Enterococcus faecalis	1	0	1	1	1	1	0	0	0	1
Enterococcus faecium	1	0	0	1	0	1	0	1	0	0
Enterococcus hirae	1	0	0	0	1	0	0	0	0	0
Enterococcus silesiacus	1	0	0	0	1	0	0	0	0	0
Enterococcus sp.	1	0	0	0	0	0	0	0	0	0
Erysipelotrichaceae bacterium GAM147	1	0	0	0	0	0	0	0	0	0
Erythrobacter sp.	1	0	0	0	0	0	0	0	0	0
Erythrobacter sp. HKB08	1	0	0	0	0	0	0	1	0	0
Erythrobacter sp. YH-07	1	0	0	0	0	0	0	0	0	0
Escherichia coli	1	1	1	1	1	1	1	1	1	1
Estrella lausannensis	1	0	1	0	1	0	0	0	0	0
Ethanoligenens harbinense	1	0	0	0	1	1	0	0	0	0
Exiguobacterium mexicanum	1	0	1	0	1	0	0	0	0	0
Exiguobacterium profundum	1	0	0	0	0	0	0	0	0	0
Extensimonas perlucida	1	0	0	0	0	0	0	0	0	0
Ezakiella massiliensis	1	0	1	1	1	1	0	0	0	0
Fabibacter pacificus	1	0	0	0	1	0	0	0	0	0
Faecalibacterium prausnitzii	1	0	1	0	1	1	0	0	0	0
Faecalitalea cylindroides	1	0	0	0	0	1	0	0	0	0
Fastidiosipila sanguinis	1	0	0	1	0	0	0	0	0	0
Fermentimonas caenicola	1	0	0	0	1	0	0	0	0	0
Ferrovibrio terrae	1	0	0	0	1	0	0	0	0	0
Fervidicella sp. AN009	1	0	0	0	0	0	0	0	0	0
Fibrella aestuarina	1	0	0	0	1	0	0	0	0	0
Fibrella sp. ES10-3-2-2	1	0	1	0	0	0	0	0	0	0
Fictibacillus arsenicus	1	0	0	0	0	0	0	0	0	0
Filifactor alocis	1	0	0	0	1	0	0	0	0	0
Filimonas lacunae	1	0	1	0	1	0	0	0	0	0
Fimbriimonas ginsengisoli	1	0	0	0	0	0	0	0	0	0
Finegoldia magna	1	0	1	1	1	1	0	1	0	0
Finegoldia sp. S3MVA9	1	0	0	0	0	0	0	0	0	0
Finegoldia sp. feline oral taxon 341	1	0	0	0	0	0	0	0	0	0
Flammeovirgaceae bacterium 311	1	0	1	0	0	0	0	0	0	0
Flaviflexus salsibiostraticola	1	0	0	1	0	0	0	1	0	0
Flaviflexus sp. H23T48	1	0	0	0	0	0	0	1	0	0
Flavisolibacter ginsenosidimutans	1	0	1	1	1	1	0	0	0	0
Flavisolibacter sp. 17J28-1	1	0	1	0	1	1	0	0	0	0
Flavisolibacter tropicus	1	0	1	0	1	0	0	0	0	0
Flavobacteriaceae bacterium	1	0	0	0	0	0	0	0	0	0
Flavobacteriaceae bacterium 10Alg115	1	0	0	0	1	0	0	0	0	0
Flavobacteriaceae bacterium MAR_2010_188	1	0	0	0	0	0	0	0	0	0
Flavobacteriales endosymbiont of Dactylaspis sp. GEM-2005c D280A	1	0	0	0	0	0	0	0	0	0
Flavobacterium album	1	1	1	0	1	1	0	0	0	0
Flavobacterium anhuiense	1	0	1	0	1	1	0	0	0	0
Flavobacterium branchiophilum	1	0	0	0	1	0	0	0	0	0
Flavobacterium commune	1	0	1	0	1	0	0	0	0	0
Flavobacterium crocinum	1	0	1	0	1	0	0	0	0	0
Flavobacterium faecale	1	0	1	0	1	1	0	1	0	0
Flavobacterium gilvum	1	0	1	1	1	0	0	0	0	0
Flavobacterium indicum	1	0	0	0	1	0	0	0	0	0
Flavobacterium johnsoniae	1	0	1	0	1	0	0	0	0	0
Flavobacterium kingsejongi	1	0	1	0	1	0	0	0	0	0
Flavobacterium nackdongense	1	0	0	0	1	0	0	0	0	0
Flavobacterium sangjuense	1	0	0	1	1	0	0	0	0	0
Flavobacterium sediminis	1	0	1	0	1	0	0	0	0	0
Flavobacterium sp.	1	0	1	1	1	1	1	0	0	0
Flavobacterium sp. 140616W15	1	0	1	0	1	0	0	1	0	0
Flavobacterium sp. CJ74	1	0	0	0	1	0	0	0	0	0
Flavobacterium sp. HYN0086	1	0	1	0	1	0	0	0	0	0
Flavobacterium sp. KBS0721	1	1	1	0	1	0	0	0	0	1
Flavonifractor plautii	1	0	1	0	0	1	0	0	0	0
Flexibacter flexilis	1	0	0	0	1	0	0	0	0	0
Fluviicola taffensis	1	0	0	0	1	0	0	0	0	0
Francisella opportunistica	1	0	0	0	1	0	0	0	0	0
Francisella sp. FSC1006	1	0	0	0	0	0	0	0	0	0
Frankia alni	1	0	1	0	0	0	0	0	0	0
Frankia sp. EAN1pec	1	0	0	0	0	0	0	0	0	0
Frankineae bacterium MT45	1	0	0	0	1	0	0	1	0	0
Frateuria aurantia	1	0	0	0	0	0	0	0	0	0
Friedmanniella luteola	1	1	1	0	1	1	0	0	0	0
Friedmanniella sagamiharensis	1	0	1	1	1	1	1	0	0	0
Frigoribacterium sp.	1	0	1	0	0	0	0	1	0	0
Frondihabitans sp. 762G35	1	0	0	1	0	1	0	1	0	0
Fuerstia marisgermanicae	1	0	0	0	0	0	0	0	0	0
Fusobacterium hwasookii	1	0	0	1	0	0	0	0	0	0
Fusobacterium nucleatum	1	0	1	1	1	1	0	0	0	1
Fusobacterium periodonticum	1	0	1	0	1	1	0	0	0	1
Fusobacterium sp. oral taxon 203	1	0	0	1	0	1	0	0	0	1
Fusobacterium varium	1	0	0	0	1	0	0	0	0	0
Gardnerella vaginalis	1	1	1	0	1	0	0	0	0	0
Geitlerinema sp. PCC 7407	1	0	1	0	1	0	0	0	0	0
Gemella haemolysans	1	1	1	1	1	1	1	0	0	0
Gemella morbillorum	1	0	1	1	0	1	0	0	0	0
Gemella palaticanis	1	1	0	0	0	0	0	0	0	0
Gemella sp.	1	0	0	0	0	0	0	0	0	0
Gemmata obscuriglobus	1	0	0	0	1	0	0	0	0	0
Gemmata sp. SH-PL17	1	0	1	0	1	1	0	0	0	1
Gemmataceae bacterium PX52	1	0	0	0	1	0	0	0	0	0
Gemmatimonas aurantiaca	1	0	0	0	0	0	0	0	0	0
Gemmatimonas phototrophica	1	0	0	0	1	0	0	0	0	0
Gemmatirosa kalamazoonesis	1	0	0	0	1	0	0	0	0	0
Geobacillus sp.	1	0	0	0	0	0	0	0	0	0
Geobacillus sp. 12AMOR1	1	0	0	0	0	0	0	1	0	0
Geobacillus sp. E263	1	0	0	0	0	1	0	0	0	0
Geobacillus sp. JS12	1	0	0	0	0	0	0	0	0	0
Geobacillus stearothermophilus	1	0	0	1	0	1	0	0	0	1
Geobacillus subterraneus	1	0	0	0	1	0	0	0	0	0
Geobacillus thermocatenulatus	1	0	0	0	0	0	0	0	0	0
Geobacillus thermodenitrificans	1	0	0	0	0	0	0	1	0	1
Geobacter sp. M18	1	0	1	0	0	0	0	0	0	0
Geodermatophilus obscurus	1	0	1	0	0	0	0	1	0	1
Georgenia satyanarayanai	1	0	0	0	0	0	0	0	0	0
Georgenia sp.	1	0	0	0	0	0	0	0	0	0
Georgenia sp. Z294	1	0	0	0	0	0	0	1	0	0
Georgenia sp. Z443	1	0	0	0	0	0	0	1	0	0
Georhizobium profundi	1	0	1	0	0	0	0	0	0	0
Geothrix fermentans	1	0	0	0	0	0	0	0	0	0
Gillisia sp. Hel1_33_143	1	0	0	0	0	0	0	0	0	0
Glaciecola sp. THG-3.7	1	0	0	0	1	1	0	0	0	0
Gloeocapsa sp. PCC 7428	1	0	0	0	1	0	0	0	0	0
Gluconacetobacter diazotrophicus	1	0	1	0	0	0	0	0	0	0
Glutamicibacter arilaitensis	1	0	0	0	0	0	0	0	0	0
Glutamicibacter creatinolyticus	1	0	0	0	1	0	0	1	0	0
Glutamicibacter halophytocola	1	0	0	0	0	0	0	0	0	0
Glutamicibacter nicotianae	1	0	0	0	1	0	0	1	0	0
Glutamicibacter sp.	1	0	0	0	0	0	0	0	0	0
Gordonia bronchialis	1	0	1	0	1	0	0	1	0	0
Gordonia insulae	1	0	0	0	1	0	0	1	0	0
Gordonia polyisoprenivorans	1	0	1	0	1	1	0	1	0	0
Gordonia rubripertincta	1	0	1	0	0	0	0	0	0	0
Gordonia sp.	1	0	0	0	0	0	0	0	0	0
Gordonia sp. 1D	1	0	1	0	1	0	0	1	0	0
Gordonia sp. KTR9	1	0	0	0	0	0	0	0	0	0
Gordonibacter sp. Marseille-P4307	1	0	0	0	0	0	0	0	0	0
Gordonibacter urolithinfaciens	1	0	0	0	0	0	0	0	0	0
Granulibacter bethesdensis	1	0	1	1	0	0	0	1	0	0
Granulicatella adiacens	1	0	1	1	1	1	0	0	0	0
Granulicatella para-adiacens	1	0	0	0	0	0	0	0	0	0
Granulicella tundricola	1	0	0	0	0	1	0	0	0	0
Haematobacter massiliensis	1	0	1	0	0	0	0	0	0	0
Haematospirillum jordaniae	1	0	0	0	0	0	0	0	0	0
Haemophilus haemolyticus	1	0	1	1	1	1	0	0	0	0
Haemophilus parainfluenzae	1	1	1	1	1	1	1	0	0	1
Haemophilus pittmaniae	1	1	0	0	1	0	0	0	0	0
Hafnia alvei	1	0	1	0	1	0	0	0	0	0
Hahella sp. KA22	1	0	0	0	0	0	0	1	0	0
Haliangium ochraceum	1	0	1	0	1	0	0	0	0	0
Haliscomenobacter hydrossis	1	0	0	0	1	0	0	0	0	0
Haloactinobacterium sp. LNNU 22110	1	0	0	0	0	0	0	0	0	0
Halobacteriovorax sp. BALOs_7	1	0	0	0	0	0	0	0	0	0
Halomicronema hongdechloris	1	0	0	0	0	0	0	0	0	0
Halomonas axialensis	1	0	0	0	0	0	0	1	0	0
Halomonas chromatireducens	1	0	0	0	0	0	0	0	0	0
Halomonas magadiensis	1	0	0	0	0	0	0	0	0	0
Halomonas sp. JS92-SW72	1	0	1	0	1	0	0	0	0	0
Halotalea alkalilenta	1	0	0	0	0	0	0	0	0	0
Hartmannibacter diazotrophicus	1	0	1	0	0	0	0	0	0	0
Hassallia byssoidea	1	0	0	0	0	1	0	0	0	0
Hathewaya histolytica	1	0	0	0	0	0	0	0	0	1
Herbaspirillum aquaticum	1	0	0	0	0	0	0	0	0	0
Herbaspirillum frisingense	1	0	0	0	0	0	0	0	0	0
Herbaspirillum huttiense	1	0	0	0	0	0	0	0	0	0
Herbaspirillum robiniae	1	0	1	0	0	0	0	0	0	0
Herbaspirillum rubrisubalbicans	1	0	1	0	0	0	0	0	0	0
Herbaspirillum seropedicae	1	0	1	0	1	0	0	0	0	0
Herbaspirillum sp. meg3	1	0	0	0	0	0	0	0	0	0
Herminiimonas arsenicoxydans	1	0	0	0	0	0	0	0	0	0
Herminiimonas arsenitoxidans	1	0	0	0	1	0	0	0	0	0
Herpetosiphon sp.	1	0	0	0	0	0	0	0	0	0
Holophaga foetida	1	0	0	0	0	0	0	0	0	0
Humibacter sp. WJ7-1	1	1	1	0	0	0	0	1	0	1
Hungateiclostridium clariflavum	1	0	0	0	0	0	0	0	0	0
Hungateiclostridium thermocellum	1	0	0	0	0	0	0	0	0	0
Hungatella hathewayi	1	0	0	1	1	1	0	0	0	0
Hydrogenophaga crassostreae	1	0	1	0	1	0	0	0	0	0
Hydrogenophaga pseudoflava	1	0	1	1	0	1	0	0	0	0
Hydrogenophaga sp. NH-16	1	0	1	0	0	0	0	1	0	0
Hydrogenophaga sp. PAMC20947	1	1	1	0	0	1	0	0	0	1
Hydrogenophaga sp. PBC	1	1	1	0	1	0	0	1	0	1
Hydrogenophaga sp. RAC07	1	0	1	0	0	0	0	0	0	1
Hydrogenophilus thermoluteolus	1	0	1	0	1	0	0	1	0	0
Hylemonella gracilis	1	1	1	0	1	1	0	0	0	0
Hymenobacter jejuensis	1	0	0	0	1	0	0	0	0	0
Hymenobacter nivis	1	0	1	0	1	0	0	0	0	0
Hymenobacter oligotrophus	1	0	0	0	0	0	0	0	0	1
Hymenobacter sedentarius	1	0	1	0	1	1	1	0	0	0
Hymenobacter sp.	1	1	0	1	1	0	0	0	0	0
Hymenobacter sp. APR13	1	0	1	1	0	1	0	0	0	0
Hymenobacter sp. DG01	1	0	0	1	1	1	0	0	0	0
Hymenobacter sp. DG25A	1	0	0	0	0	0	0	0	0	0
Hymenobacter sp. PAMC 26554	1	1	1	1	1	1	0	0	0	0
Hymenobacter swuensis	1	0	1	1	1	0	0	0	0	0
Hyphomicrobium denitrificans	1	0	1	0	1	0	0	0	0	0
Hyphomicrobium nitrativorans	1	0	1	0	0	0	0	0	0	0
Hyphomicrobium sp. MC1	1	0	1	0	0	0	0	0	0	0
Hyphomonadaceae bacterium UKL13-1	1	0	0	0	0	0	0	0	0	0
Ilumatobacter coccineus	1	0	1	0	1	0	0	0	0	0
Inhella inkyongensis	1	0	1	0	0	0	0	0	0	0
Intestinibaculum porci	1	0	0	0	0	0	0	0	0	0
Intrasporangium calvum	1	0	1	0	1	0	0	0	0	0
Isoptericola dokdonensis	1	0	0	0	0	0	0	1	0	0
Isoptericola sp.	1	0	0	0	0	0	0	0	0	0
Isoptericola variabilis	1	0	0	0	0	0	0	0	0	0
Isosphaera pallida	1	0	0	0	1	0	0	0	0	0
Janibacter indicus	1	0	1	0	1	0	0	0	0	0
Janibacter limosus	1	0	1	0	1	1	0	0	0	0
Janibacter sp.	1	0	0	0	0	0	0	0	0	0
Jannaschia sp. CCS1	1	0	0	0	0	0	0	0	0	0
Janthinobacterium sp. 17J80-10	1	0	0	1	0	0	0	0	0	0
Janthinobacterium sp. LM6	1	0	0	0	1	0	0	0	0	0
Janthinobacterium sp. Marseille	1	0	0	0	1	0	0	0	0	0
Janthinobacterium sp. SNU WT3	1	1	1	1	1	1	0	0	0	0
Janthinobacterium svalbardensis	1	0	0	0	1	0	0	0	0	0
Jatrophihabitans endophyticus	1	0	0	0	0	0	0	0	0	0
Jatrophihabitans sp. GAS493	1	0	0	1	0	0	0	0	0	0
Jeotgalibaca sp. PTS2502	1	1	0	0	0	0	0	0	0	0
Jeotgalicoccus huakuii	1	0	0	0	0	0	0	0	0	0
Jeotgalicoccus sp.	1	0	0	0	0	0	0	0	0	0
Jiangella alkaliphila	1	0	0	0	0	0	0	0	0	0
Jiangella sp. DSM 45060	1	0	0	0	1	1	0	0	0	0
Jonquetella anthropi	1	0	0	0	0	0	0	0	0	0
Ketobacter alkanivorans	1	0	0	0	1	0	0	0	0	0
Ketogulonicigenium robustum	1	0	0	0	1	0	0	0	0	1
Kibdelosporangium phytohabitans	1	0	0	0	0	0	0	0	0	0
Kinneretia asaccharophila	1	0	0	0	0	0	0	0	0	0
Kiritimatiella glycovorans	1	0	0	0	0	0	0	0	0	0
Kitasatospora aureofaciens	1	0	0	0	0	0	0	0	0	0
Klebsiella oxytoca	1	1	1	0	0	0	0	1	0	0
Klebsiella pneumoniae	1	1	1	1	1	1	1	1	0	0
Knoellia sp.	1	0	0	0	0	0	0	0	0	0
Kocuria flava	1	0	0	0	0	1	0	0	0	0
Kocuria indica	1	0	1	0	1	0	1	0	0	0
Kocuria palustris	1	1	1	0	1	1	0	1	0	0
Kocuria rhizophila	1	1	0	0	1	0	1	0	0	0
Kocuria rosea	1	0	1	0	1	1	1	1	0	0
Kocuria sp.	1	0	0	0	0	0	0	0	0	0
Kocuria sp. ALBL_201	1	0	0	0	0	0	0	0	0	0
Kocuria sp. BT304	1	1	0	0	1	0	1	0	0	0
Kocuria turfanensis	1	0	1	0	0	0	0	0	0	0
Kosakonia sacchari	1	0	0	0	0	0	0	0	0	0
Kozakia baliensis	1	0	0	0	0	0	0	0	0	0
Kribbella flavida	1	0	0	0	1	0	0	0	0	0
Kurthia sp.	1	0	1	0	0	0	0	0	0	0
Kushneria marisflavi	1	0	0	0	1	0	0	0	0	0
Kytococcus sedentarius	1	0	1	0	1	0	0	1	0	0
Kytococcus sp.	1	0	0	0	0	0	0	0	0	0
Labedella sp.	1	0	0	0	0	0	0	0	0	0
Labilibaculum antarcticum	1	0	0	0	1	0	0	0	0	0
Labilithrix luteola	1	0	0	0	1	1	0	0	0	0
Labrenzia sp.	1	0	0	0	0	0	0	0	0	0
Labrenzia sp. PHM005	1	0	1	0	0	0	0	0	0	0
Labrenzia sp. VG12	1	0	0	1	1	1	0	0	0	0
Lachnoanaerobaculum umeaense	1	0	1	1	1	1	0	0	0	1
Lachnoclostridium phytofermentans	1	0	0	1	1	0	0	0	0	0
Lachnospira eligens	1	0	0	0	1	1	0	0	0	0
Lachnospiraceae bacterium	1	0	1	1	1	1	0	0	0	1
Lachnospiraceae bacterium Choco86	1	0	0	0	1	0	0	0	0	0
Lachnospiraceae bacterium DNF00160	1	0	0	0	0	0	0	0	0	0
Lachnospiraceae bacterium KGMB03038	1	0	0	0	0	0	0	0	0	0
Lachnospiraceae bacterium S4-BM2	1	0	0	0	0	0	0	0	0	0
Lacihabitans sp.	1	0	0	0	1	0	0	0	0	0
Lacrimispora saccharolytica	1	0	0	0	0	0	0	0	0	0
Lacrimispora sphenoides	1	0	0	1	0	1	0	0	0	0
Lactobacillus acidipiscis	1	0	0	0	0	0	0	0	0	0
Lactobacillus acidophilus	1	0	0	0	0	0	0	0	0	0
Lactobacillus amylolyticus	1	0	0	0	0	0	0	0	0	0
Lactobacillus amylophilus	1	0	0	0	0	0	0	0	0	0
Lactobacillus amylovorus	1	1	1	0	1	0	0	0	0	0
Lactobacillus apis	1	0	0	0	0	0	0	0	0	0
Lactobacillus bombi	1	0	0	0	0	0	0	0	0	0
Lactobacillus brantae	1	0	0	0	0	0	0	0	0	0
Lactobacillus casei	1	0	0	0	0	0	0	0	0	0
Lactobacillus crispatus	1	0	1	1	1	1	0	0	0	0
Lactobacillus curvatus	1	0	1	0	1	0	0	0	0	0
Lactobacillus delbrueckii	1	0	1	1	1	0	0	1	0	0
Lactobacillus fermentum	1	0	0	1	1	1	0	0	0	0
Lactobacillus gasseri	1	1	0	1	0	1	0	0	0	0
Lactobacillus iners	1	0	0	0	1	0	1	0	0	1
Lactobacillus jensenii	1	0	1	0	1	0	0	0	0	0
Lactobacillus johnsonii	1	1	0	1	1	1	0	0	0	0
Lactobacillus kefiranofaciens	1	0	0	0	0	0	0	0	0	0
Lactobacillus lindneri	1	0	0	0	0	0	0	0	0	0
Lactobacillus oligofermentans	1	0	0	0	0	0	0	0	0	0
Lactobacillus paracasei	1	0	0	0	0	1	0	0	0	0
Lactobacillus paragasseri	1	1	1	0	1	1	0	0	0	0
Lactobacillus reuteri	1	0	1	0	1	0	0	0	0	0
Lactobacillus rhamnosus	1	0	0	1	1	1	0	0	0	0
Lactobacillus salivarius	1	0	0	0	0	0	0	0	0	1
Lactobacillus sp.	1	0	0	1	1	0	0	0	0	0
Lactococcus garvieae	1	0	0	0	0	0	0	0	0	0
Lactococcus lactis	1	1	1	1	1	1	1	0	0	1
Lacunisphaera limnophila	1	0	0	0	0	0	0	0	0	0
Lautropia mirabilis	1	0	1	0	1	1	1	0	0	0
Lautropia sp.	1	0	0	0	0	0	0	0	0	0
Lawsonella clevelandensis	1	1	1	1	1	1	1	1	0	1
Leadbetterella byssophila	1	0	0	0	1	0	0	0	0	0
Leclercia adecarboxylata	1	0	1	0	0	0	0	1	0	0
Leclercia sp. W6	1	0	0	0	0	0	0	0	0	0
Legionella adelaidensis	1	0	0	0	0	0	0	0	0	0
Legionella cherrii	1	0	0	0	1	0	0	0	0	0
Legionella israelensis	1	0	0	0	0	0	0	0	0	0
Legionella longbeachae	1	0	0	0	1	0	0	0	0	0
Legionella pneumophila	1	0	0	0	1	0	0	0	0	0
Legionella spiritensis	1	0	0	0	0	1	0	0	0	0
Leifsonia sp. 21MFCrub1.1	1	0	1	0	1	0	0	1	0	0
Leifsonia sp. 98AMF	1	0	1	0	1	0	0	0	0	0
Leifsonia xyli	1	0	1	0	1	0	0	1	0	0
Leisingera aquaemixtae	1	0	0	0	0	0	0	0	0	0
Lelliottia amnigena	1	0	0	0	0	0	0	0	0	0
Leptolyngbya sp. O-77	1	0	0	0	0	1	0	0	0	0
Leptothrix cholodnii	1	0	1	0	0	0	0	0	0	0
Leptotrichia buccalis	1	0	0	0	0	0	0	0	0	1
Leptotrichia hofstadii	1	0	0	0	1	1	0	0	0	1
Leptotrichia hongkongensis	1	0	0	0	1	0	0	0	0	1
Leptotrichia sp. oral taxon 212	1	0	1	1	1	1	0	0	0	1
Leptotrichia sp. oral taxon 498	1	0	0	0	0	1	0	0	0	1
Leptotrichia trevisanii	1	0	0	0	1	0	0	0	0	0
Leptotrichia wadei	1	1	1	1	1	1	0	0	0	0
Leucobacter sp. DSM 101948	1	0	0	0	0	0	0	1	0	0
Leucobacter triazinivorans	1	0	0	0	0	0	0	1	0	0
Leuconostoc carnosum	1	0	1	0	0	0	0	0	0	0
Leuconostoc citreum	1	0	1	0	0	0	0	0	0	0
Leuconostoc fallax	1	0	1	0	0	0	0	0	0	0
Leuconostoc kimchii	1	0	0	0	0	0	0	0	0	0
Leuconostoc lactis	1	0	1	0	1	0	0	0	0	0
Leuconostoc mesenteroides	1	0	1	0	1	0	0	0	0	0
Leuconostoc pseudomesenteroides	1	0	0	0	0	0	0	0	0	0
Leucothrix mucor	1	0	0	0	0	0	0	0	0	0
Limihaloglobus sulfuriphilus	1	0	0	0	0	0	0	0	0	0
Limnochorda pilosa	1	0	0	0	0	0	0	0	0	0
Limnohabitans planktonicus	1	0	0	0	0	0	0	0	0	0
Limnohabitans sp. 103DPR2	1	0	1	0	1	0	0	0	0	0
Limnohabitans sp. 2KL-27	1	0	0	0	0	0	0	0	0	0
Limnohabitans sp. 63ED37-2	1	0	1	0	0	0	0	0	0	0
Limnohabitans sp. JirII-7	1	0	0	0	0	0	0	0	0	0
Limnohabitans sp. MMS-10A-192	1	0	0	0	0	0	0	0	0	0
Limnohabitans sp. Rim11	1	0	0	0	0	0	0	0	0	0
Limnohabitans sp. WS1	1	0	0	0	1	0	0	0	0	0
Litoreibacter sp. LN3S51	1	0	0	0	0	0	0	0	0	0
Litorilituus sediminis	1	0	0	0	1	0	0	0	0	0
Loktanella sp.	1	0	0	0	0	0	0	0	0	0
Longibaculum sp. KGMB06250	1	0	0	0	0	1	0	0	0	0
Luteibacter pinisoli	1	0	1	0	1	0	0	0	0	0
Luteimonas sp. 100111	1	0	0	0	0	0	0	0	0	0
Luteimonas sp. Gr-4	1	0	1	0	1	0	0	0	0	0
Luteimonas sp. YGD11-2	1	0	1	0	0	0	0	0	0	0
Luteimonas yindakuii	1	0	0	0	0	0	0	0	0	0
Luteitalea pratensis	1	0	0	0	1	0	0	0	0	0
Lutibacter profundi	1	0	0	0	0	0	0	0	0	0
Lysinibacillus sphaericus	1	0	0	0	0	1	0	1	0	0
Lysobacter alkalisoli	1	0	1	0	0	0	0	0	0	0
Lysobacter sp. TY2-98	1	0	1	0	0	0	0	1	0	0
Macrococcus canis	1	0	0	0	0	1	0	0	0	0
Mageeibacillus indolicus	1	0	0	0	0	0	0	0	0	0
Magnetospirillum gryphiswaldense	1	0	0	0	0	0	0	0	0	0
Magnetospirillum sp. ME-1	1	0	0	0	1	0	0	0	0	0
Mannheimia haemolytica	1	0	1	0	0	0	0	0	0	0
Mannheimia sp. USDA-ARS-USMARC-1261	1	0	0	0	0	0	0	0	0	0
Maribacter sp. T28	1	0	0	0	1	0	0	0	0	0
Marichromatium purpuratum	1	0	1	0	1	0	0	0	0	0
Marinilactibacillus sp. 15R	1	0	1	0	0	0	0	0	0	0
Marinomonas primoryensis	1	0	0	0	0	0	0	0	0	0
Maritalea myrionectae	1	0	0	0	0	0	0	0	0	0
Marivirga tractuosa	1	0	0	0	0	0	0	0	0	0
Marmoricola scoriae	1	1	1	0	1	0	1	0	0	1
Marmoricola sp.	1	0	0	0	1	0	0	0	0	0
Marmoricola sp. FXJ8.178	1	0	0	0	0	0	0	0	0	0
Massilia armeniaca	1	0	1	0	0	0	0	0	0	0
Massilia oculi	1	0	1	0	0	1	1	1	0	1
Massilia plicata	1	1	1	1	0	1	0	1	0	0
Massilia putida	1	1	1	0	0	1	0	0	0	0
Massilia sp.	1	0	0	0	0	0	0	0	0	1
Massilia sp. WG5	1	0	1	0	1	1	0	1	0	1
Massilia sp. YMA4	1	0	1	0	0	0	0	0	0	0
Massilia umbonata	1	0	1	0	1	0	0	1	0	0
Massilia violaceinigra	1	0	0	0	0	0	0	0	0	0
Megamonas hypermegale	1	1	0	0	1	1	0	0	0	0
Megasphaera elsdenii	1	0	0	0	1	1	0	0	0	0
Megasphaera hexanoica	1	0	0	1	0	1	0	0	0	0
Megasphaera stantonii	1	0	0	1	1	1	0	0	0	0
Meiothermus ruber	1	1	0	0	0	0	0	0	0	0
Meiothermus silvanus	1	1	0	0	0	0	0	0	0	0
Melaminivora sp. SC2-9	1	0	1	0	1	1	0	0	0	0
Melissococcus plutonius	1	0	0	0	0	0	0	0	0	0
Mesorhizobium loti	1	1	0	0	0	0	0	0	0	0
Mesorhizobium sp.	1	0	0	0	0	0	0	0	0	0
Mesorhizobium sp. DCY119	1	0	1	0	1	0	0	0	0	0
Mesorhizobium sp. M4B.F.Ca.ET.058.02.1.1	1	0	1	1	1	0	0	0	0	0
Mesorhizobium sp. M7D.F.Ca.US.005.01.1.1	1	0	0	0	1	0	0	0	0	0
Methylacidiphilum infernorum	1	0	0	0	0	0	0	0	0	0
Methylacidiphilum kamchatkense	1	0	0	0	0	0	0	0	0	0
Methylibium sp. Pch-M	1	0	1	0	1	0	0	1	0	0
Methylobacterium adhaesivum	1	0	0	0	0	0	0	0	0	0
Methylobacterium aquaticum	1	0	1	0	1	0	0	0	0	0
Methylobacterium brachiatum	1	0	1	0	0	1	0	1	0	1
Methylobacterium currus	1	0	1	0	0	0	0	0	0	0
Methylobacterium durans	1	0	1	0	0	0	0	0	0	0
Methylobacterium nodulans	1	0	1	0	0	1	0	0	0	0
Methylobacterium oryzae	1	0	1	0	0	0	0	0	0	0
Methylobacterium phyllosphaerae	1	0	1	1	0	1	0	1	0	0
Methylobacterium radiotolerans	1	0	1	0	1	0	0	0	0	0
Methylobacterium sp.	1	0	1	0	0	0	0	0	0	1
Methylobacterium sp. 17Sr1-1	1	0	1	0	0	0	0	0	0	0
Methylobacterium sp. 17Sr1-43	1	0	1	0	0	0	0	0	0	0
Methylobacterium sp. 4-46	1	0	0	0	0	0	0	0	0	0
Methylobacterium sp. AMS5	1	0	1	0	0	0	0	0	0	0
Methylobacterium sp. C1	1	1	1	0	0	1	0	0	0	0
Methylobacterium sp. DM1	1	1	1	0	1	0	0	0	0	0
Methylobacterium sp. OX1_1_1_S1	1	0	0	0	0	0	0	0	0	0
Methylobacterium sp. PK29_S1	1	0	0	0	0	0	0	0	0	0
Methylobacterium sp. XJLW	1	0	1	1	0	1	0	0	0	0
Methylobacterium terrae	1	0	1	0	1	0	0	0	0	1
Methyloceanibacter caenitepidi	1	0	0	0	0	0	0	0	0	0
Methylocella tundrae	1	0	0	0	0	0	0	0	0	0
Methylocystis bryophila	1	0	0	0	0	0	0	1	0	0
Methylomonas clara	1	0	0	0	0	0	0	0	0	0
Methylomusa anaerophila	1	0	0	0	1	0	0	0	0	0
Methylophaga nitratireducenticrescens	1	0	0	0	0	0	0	0	0	0
Methylophilus medardicus	1	0	0	0	1	0	0	0	0	0
Methylophilus sp. TWE2	1	0	0	0	1	0	0	0	0	0
Methylorubrum extorquens	1	1	1	1	1	1	0	1	0	0
Methylorubrum populi	1	1	1	1	1	0	0	0	0	1
Methylorubrum salsuginis	1	1	0	0	0	0	0	0	0	0
Methylorubrum zatmanii	1	0	0	0	0	0	0	0	0	0
Methylotenera versatilis	1	0	1	0	1	0	0	0	0	0
Methyloversatilis sp. RAC08	1	1	1	0	1	0	0	0	0	0
Microbacterium aurum	1	0	1	1	1	0	0	1	0	0
Microbacterium esteraromaticum	1	0	0	0	0	0	0	0	0	0
Microbacterium foliorum	1	0	1	0	0	0	0	1	0	1
Microbacterium hominis	1	0	0	0	1	0	0	1	0	0
Microbacterium kitamiense	1	0	0	0	0	0	0	0	0	0
Microbacterium lemovicicum	1	0	0	0	0	1	0	1	0	0
Microbacterium marinilacus	1	0	0	0	0	0	0	0	0	0
Microbacterium paludicola	1	0	0	0	0	0	0	0	0	0
Microbacterium sediminis	1	0	0	0	0	0	0	1	0	0
Microbacterium sp.	1	0	0	1	0	0	0	0	0	1
Microbacterium sp. BH-3-3-3	1	0	0	0	1	0	0	0	0	0
Microbacterium sp. PM5	1	0	1	1	0	0	0	1	0	0
Microbacterium sp. RG1	1	0	0	0	0	0	0	0	0	0
Microbacterium sp. SGAir0570	1	0	1	0	0	0	0	1	0	0
Microbacterium sp. Y-01	1	0	1	0	0	1	0	1	0	0
Microbacterium sp. str. 'China'	1	0	0	1	1	0	0	0	0	0
Microcella alkaliphila	1	0	0	0	0	0	0	1	0	0
Microchaete diplosiphon	1	0	0	0	1	0	0	0	0	0
Micrococcus cohnii	1	0	0	0	0	0	0	0	0	0
Micrococcus luteus	1	1	1	1	1	0	1	1	0	0
Micrococcus sp.	1	0	1	0	0	0	0	0	0	0
Micrococcus sp. A7	1	0	0	0	0	0	0	0	0	0
Micrococcus sp. KBS0714	1	1	1	0	1	1	0	1	0	0
Micrococcus yunnanensis	1	0	0	0	0	0	0	0	0	0
Microcoleus vaginatus	1	0	1	0	0	1	0	0	0	0
Microcystis aeruginosa	1	0	0	0	1	0	0	0	0	0
Microcystis flos-aquae	1	0	0	0	0	0	0	0	0	0
Microcystis panniformis	1	0	0	0	1	0	0	0	0	0
Microcystis sp. TAU-MAC 2310	1	0	0	0	0	0	0	0	0	0
Microcystis viridis	1	0	0	0	1	0	0	0	0	0
Microlunatus phosphovorus	1	0	1	0	1	0	0	0	0	0
Microlunatus sp.	1	0	0	0	0	0	0	0	0	0
Microlunatus sp. KUDC0627	1	0	0	0	1	1	1	0	0	0
Micromonospora inositola	1	0	0	0	0	0	0	0	0	0
Microterricola viridarii	1	0	0	0	0	0	0	1	0	0
Microvirga sp. 17 mud 1-3	1	0	0	0	1	1	0	0	0	0
Microvirgula aerodenitrificans	1	0	0	0	0	0	0	0	0	0
Minicystis rosea	1	1	0	0	1	1	0	0	0	0
Miniimonas sp. S16	1	0	0	0	1	0	0	1	0	1
Mitsuaria sp. 7	1	0	1	0	0	0	1	0	0	0
Mixta calida	1	0	0	0	1	0	0	0	0	0
Mobiluncus curtisii	1	0	0	0	0	0	0	0	0	0
Modestobacter excelsi	1	0	0	0	0	0	0	0	0	1
Modestobacter marinus	1	0	1	0	0	0	0	1	0	0
Mogibacterium diversum	1	0	1	1	1	1	0	0	0	0
Mogibacterium pumilum	1	0	0	0	0	0	0	0	0	0
Moraxella bovis	1	0	0	0	1	0	0	0	0	0
Moraxella bovoculi	1	1	0	0	1	0	0	0	0	0
Moraxella catarrhalis	1	0	1	0	0	0	0	1	0	0
Moraxella osloensis	1	1	1	1	1	1	1	1	0	1
Moraxellaceae bacterium HYN0046	1	0	1	0	0	0	0	0	0	0
Morganella morganii	1	0	1	0	0	0	0	0	0	0
Morococcus cerebrosus	1	0	0	0	0	0	0	0	0	0
Mucilaginibacter ginsenosidivorans	1	0	0	0	1	0	0	0	0	0
Mucilaginibacter ginsenosidivorax	1	0	0	0	1	0	0	0	0	0
Mucilaginibacter gotjawali	1	0	0	0	0	0	0	0	0	0
Mucilaginibacter sp. HYN0043	1	0	0	0	1	1	0	0	0	0
Murdochiella vaginalis	1	0	0	0	1	1	0	0	0	0
Muribaculum sp. H5	1	0	0	0	0	0	0	0	0	0
Muricauda lutaonensis	1	0	0	0	1	0	0	0	0	0
Mycobacterium avium	1	0	1	0	1	0	0	0	0	0
Mycobacterium chimaera	1	0	0	0	0	0	0	1	0	0
Mycobacterium colombiense	1	0	0	0	0	0	0	0	0	0
Mycobacterium dioxanotrophicus	1	0	0	0	0	0	0	1	0	0
Mycobacterium intracellulare	1	0	0	0	1	0	0	0	0	0
Mycobacterium paragordonae	1	0	1	0	0	1	0	0	0	0
Mycobacterium sp. DL90	1	0	0	0	0	0	0	0	0	0
Mycobacterium sp. MS1601	1	0	0	0	0	0	0	0	0	0
Mycobacterium sp. YC-RL4	1	0	1	0	1	0	0	1	0	0
Mycobacterium sp. djl-10	1	0	0	0	0	0	0	0	0	0
Mycobacterium tuberculosis	1	0	0	0	0	0	0	0	0	0
Mycobacteroides abscessus	1	1	0	0	0	0	0	1	0	0
Mycobacteroides chelonae	1	1	0	1	1	1	0	0	0	0
Mycolicibacter terrae	1	0	0	0	1	0	0	0	0	0
Mycolicibacterium chitae	1	0	1	0	1	0	0	0	0	0
Mycolicibacterium chubuense	1	0	0	0	0	0	0	0	0	0
Mycolicibacterium flavescens	1	0	0	0	0	0	0	0	0	0
Mycolicibacterium gilvum	1	0	0	0	0	0	0	0	0	0
Mycolicibacterium goodii	1	0	0	0	1	0	0	1	0	0
Mycolicibacterium litorale	1	0	0	0	1	0	0	1	0	0
Mycolicibacterium neoaurum	1	0	1	0	0	0	0	0	0	0
Mycolicibacterium rhodesiae	1	0	1	0	0	0	0	0	0	0
Mycolicibacterium sp.	1	0	0	0	0	0	0	0	0	0
Mycolicibacterium vaccae	1	0	1	0	0	0	0	0	0	0
Mycolicibacterium vanbaalenii	1	0	0	0	1	0	0	1	0	0
Mycoplasma iguanae	1	0	0	0	0	0	0	0	0	0
Mycoplasma phocidae	1	0	0	0	0	0	0	0	0	0
Myroides sp. ZB35	1	0	0	0	0	0	0	0	0	0
Myxococcus hansupus	1	0	0	0	0	0	0	1	0	0
Myxococcus xanthus	1	0	0	0	1	0	0	0	0	0
Nakamurella multipartita	1	0	0	0	0	0	0	1	0	0
Nakamurella panacisegetis	1	0	0	0	0	0	0	0	0	0
Nakamurella sp. s14-144	1	0	0	1	0	0	1	0	0	0
Nannocystis pusilla	1	0	0	0	1	0	0	0	0	0
Natranaerobius thermophilus	1	0	0	0	0	0	0	0	0	0
Neisseria cinerea	1	0	1	1	0	1	0	0	0	0
Neisseria elongata	1	0	1	0	1	1	0	0	0	1
Neisseria flavescens	1	0	1	0	0	1	0	0	0	1
Neisseria gonorrhoeae	1	0	0	0	1	0	0	0	0	0
Neisseria lactamica	1	0	1	0	1	0	0	0	0	1
Neisseria meningitidis	1	0	1	0	1	1	1	1	0	0
Neisseria mucosa	1	0	1	1	1	0	0	1	0	0
Neisseria shayeganii	1	0	0	0	0	0	0	0	0	0
Neisseria sicca	1	0	0	1	0	0	0	0	0	0
Neisseria sp. oral taxon 014	1	1	0	0	1	0	0	0	0	1
Neisseria subflava	1	1	1	0	1	1	0	0	0	0
Neisseria weaveri	1	1	0	0	1	0	0	0	0	0
Neisseria zoodegmatis	1	0	0	0	1	0	0	0	0	0
Neisseriaceae bacterium DSM 100970	1	0	0	0	1	0	0	0	0	0
Neochlamydia sp. S13	1	0	1	1	1	1	0	0	0	0
Neomicrococcus aestuarii	1	0	0	0	0	0	0	0	0	0
Neorhizobium huautlense	1	0	0	0	0	0	0	0	0	0
Neorhizobium sp. NCHU2750	1	0	1	0	0	0	0	0	0	0
Neorhizobium sp. SOG26	1	0	1	0	1	0	0	0	0	0
Neorickettsia helminthoeca	1	0	0	0	0	0	0	0	0	0
Nesterenkonia sp. NBAIMH1	1	0	1	0	0	0	0	0	0	0
Nevskia ramosa	1	0	1	0	1	0	0	0	0	0
Niabella ginsenosidivorans	1	0	0	0	1	0	0	0	0	0
Niabella soli	1	0	0	0	0	0	0	0	0	0
Niastella koreensis	1	0	0	1	1	1	0	0	0	0
Nibricoccus aquaticus	1	1	0	0	1	0	0	0	0	0
Nitratireductor basaltis	1	0	0	0	1	0	0	0	0	0
Nitratireductor sp. SY7	1	0	0	0	1	0	0	0	0	1
Nitrospira defluvii	1	0	1	0	0	0	0	0	0	0
Nitrospira japonica	1	0	0	0	0	0	0	0	0	0
Nitrospira moscoviensis	1	0	1	0	0	0	0	0	0	0
Nitrospirillum amazonense	1	0	1	0	0	0	0	0	0	0
Niveispirillum cyanobacteriorum	1	0	1	0	0	0	0	0	0	0
Nocardia asteroides	1	0	1	0	0	0	0	0	0	0
Nocardia cyriacigeorgica	1	0	0	0	1	0	0	1	0	0
Nocardia farcinica	1	0	0	0	0	0	0	0	0	0
Nocardia mangyaensis	1	0	0	0	0	0	0	0	0	0
Nocardia sp. CS682	1	0	0	0	1	0	0	0	0	0
Nocardioides daphniae	1	0	1	1	0	1	0	1	0	0
Nocardioides dokdonensis	1	0	0	0	0	1	0	0	0	0
Nocardioides humi	1	0	1	0	1	0	0	1	0	0
Nocardioides sp. 603	1	0	0	0	1	0	0	0	0	0
Nocardioides sp. HY056	1	0	1	0	1	0	0	0	0	0
Nocardioides sp. JS614	1	0	1	1	1	0	0	0	0	1
Nocardioides sp. KUDC 5002	1	0	0	0	0	0	0	1	0	0
Nocardioides sp. MMS17-SY207-3	1	0	0	1	1	0	0	0	0	0
Nocardioides sp. S-1144	1	1	0	1	1	0	0	0	0	1
Nocardioides sp. dk3136	1	0	0	0	0	0	0	1	0	0
Nocardiopsis alba	1	0	0	0	0	0	0	1	0	0
Nocardiopsis valliformis	1	0	0	0	0	0	0	0	0	0
Nonlabens spongiae	1	0	0	0	0	0	0	0	0	0
Nostoc sphaeroides	1	0	1	0	0	0	0	0	0	0
Novibacillus thermophilus	1	0	0	0	0	0	0	0	0	0
Noviherbaspirillum sp.	1	0	0	0	0	0	0	0	0	0
Noviherbaspirillum sp. UKPF54	1	0	1	0	1	0	0	1	0	0
Novosphingobium ginsenosidimutans	1	0	1	0	1	0	0	0	0	0
Novosphingobium pentaromativorans	1	0	1	0	0	0	0	0	0	0
Novosphingobium resinovorum	1	0	0	0	0	0	0	1	0	0
Novosphingobium sp.	1	0	0	1	0	0	0	0	0	0
Novosphingobium sp. ABRDHK2	1	0	1	0	0	1	0	1	0	0
Novosphingobium sp. P6W	1	0	0	0	0	1	0	0	0	0
Novosphingobium sp. THN1	1	0	0	0	1	0	0	0	0	0
Oceanicola sp. D3	1	0	0	0	1	0	0	0	0	0
Ochrobactrum anthropi	1	0	1	0	1	1	1	0	0	0
Ochrobactrum sp.	1	0	0	0	0	0	0	0	0	0
Odoribacter splanchnicus	1	0	0	0	0	0	0	0	0	0
Oenococcus kitaharae	1	0	0	0	0	0	0	0	0	0
Oenococcus oeni	1	0	0	0	0	0	0	0	0	0
Oerskovia sp. KBS0722	1	0	1	0	1	0	0	0	0	0
Oligella urethralis	1	0	0	0	0	0	0	0	0	0
Oligotropha carboxidovorans	1	1	0	0	0	0	0	0	0	0
Olleya sp. Bg11-27	1	0	0	0	0	0	0	0	0	0
Olsenella sp. oral taxon 807	1	0	1	0	0	0	0	0	0	0
Olsenella umbonata	1	0	0	0	0	0	0	0	0	0
Opitutaceae bacterium TAV5	1	0	0	0	1	0	0	0	0	0
Opitutus sp. GAS368	1	0	0	0	1	1	0	0	0	0
Opitutus sp. VeGlc2	1	0	0	0	1	0	0	0	0	0
Opitutus terrae	1	0	0	0	1	0	0	0	0	0
Ornithinibacillus contaminans	1	0	0	0	0	0	0	0	0	0
Ornithinimicrobium flavum	1	0	0	0	1	0	0	0	0	1
Ornithinimicrobium kibberense	1	0	0	0	0	0	0	0	0	0
Ornithinimicrobium sp. AMA3305	1	0	0	0	0	0	0	1	0	0
Ornithobacterium rhinotracheale	1	0	0	0	0	0	0	0	0	0
Oscillatoria amoena	1	0	0	0	0	0	0	0	0	0
Oscillatoria nigro-viridis	1	0	1	0	1	0	0	0	0	0
Ottowia oryzae	1	0	1	0	1	1	0	0	0	0
Paenarthrobacter sp.	1	0	0	0	0	0	0	0	0	0
Paenibacillus beijingensis	1	0	0	0	0	0	0	0	0	0
Paenibacillus crassostreae	1	0	0	0	0	0	0	0	0	0
Paenibacillus polymyxa	1	0	0	0	0	0	0	0	0	0
Paenibacillus sp.	1	0	1	0	0	0	1	0	0	0
Paenibacillus sp. JDR-2	1	0	0	0	0	0	0	0	0	0
Paeniclostridium sordellii	1	0	0	1	0	1	0	0	0	0
Pajaroellobacter abortibovis	1	0	0	0	0	0	0	0	0	0
Paludibacter propionicigenes	1	0	0	0	1	0	0	0	0	0
Paludibacterium sp. 12-54	1	0	0	0	0	0	0	0	0	0
Paludisphaera borealis	1	0	1	0	1	1	0	1	0	0
Panacibacter ginsenosidivorans	1	0	1	0	1	1	0	0	0	0
Pandoraea apista	1	0	1	0	0	1	0	0	0	0
Pandoraea pnomenusa	1	0	1	0	1	0	0	0	0	0
Pandoraea sp. XY-2	1	0	0	0	0	0	0	0	0	0
Pantoea agglomerans	1	0	0	0	0	0	0	1	0	0
Pantoea alhagi	1	0	0	0	0	0	0	0	0	0
Pantoea dispersa	1	0	0	0	1	0	1	0	0	0
Pantoea rwandensis	1	0	0	0	0	0	0	0	0	0
Pantoea sp. At-9b	1	0	0	0	0	0	0	0	0	0
Pantoea sp. CCBC3-3-1	1	0	1	0	0	0	0	0	0	0
Pantoea sp. SO10	1	0	1	0	0	0	0	0	0	0
Pantoea vagans	1	0	1	0	1	0	0	0	0	0
Parabacteroides distasonis	1	0	0	1	1	1	0	0	0	0
Parabacteroides sp.	1	0	0	0	0	0	0	0	0	0
Parabacteroides sp. CT06	1	0	0	0	1	0	0	0	0	0
Paraburkholderia caffeinilytica	1	0	1	0	1	0	0	1	0	0
Paraburkholderia caledonica	1	0	1	0	0	0	0	0	0	0
Paraburkholderia fungorum	1	1	0	0	1	0	0	0	0	0
Paraburkholderia kirstenboschensis	1	0	0	0	0	0	0	0	0	0
Paraburkholderia madseniana	1	0	0	0	0	0	0	0	0	0
Paraburkholderia megapolitana	1	0	1	0	0	0	0	0	0	0
Paraburkholderia xenovorans	1	0	1	0	0	0	0	0	0	0
Parachlamydia acanthamoebae	1	0	1	0	0	0	0	0	0	0
Paracoccus carotinifaciens	1	0	0	0	0	0	0	0	0	0
Paracoccus contaminans	1	0	1	0	1	0	1	0	0	0
Paracoccus denitrificans	1	0	1	0	1	1	0	0	0	0
Paracoccus mutanolyticus	1	0	1	0	0	0	0	0	0	0
Paracoccus sp.	1	0	0	0	1	0	0	0	0	0
Paracoccus sp. 2251	1	0	1	1	1	1	0	0	0	1
Paracoccus sp. Arc7-R13	1	0	1	0	1	1	0	1	0	1
Paracoccus sp. Ol18	1	0	1	0	0	0	0	0	0	0
Paracoccus sp. SC2-6	1	1	0	1	1	0	0	0	0	1
Paracoccus yeei	1	1	1	0	1	1	1	1	0	0
Paracoccus zhejiangensis	1	0	1	0	0	0	0	0	0	0
Paracraurococcus sp.	1	0	0	1	0	0	0	0	0	0
Paraflavitalea soli	1	0	0	0	1	1	0	0	0	0
Paraprevotella xylaniphila	1	0	0	1	0	1	0	0	0	0
Pararheinheimera mesophila	1	0	0	0	0	0	0	0	0	0
Pararhizobium sp.	1	0	0	0	0	0	0	0	0	0
Parashewanella sp. MEBiC05444	1	0	0	0	1	0	0	0	0	0
Parolsenella catena	1	0	0	0	0	0	0	0	0	0
Parvimonas micra	1	0	0	1	1	1	0	0	0	0
Pasteurella multocida	1	1	1	0	1	0	0	1	0	0
Patulibacter medicamentivorans	1	0	0	0	0	0	0	0	0	0
Paucibacter sp. KCTC 42545	1	0	1	0	0	0	0	0	0	0
Paucimonas lemoignei	1	0	1	0	0	0	0	0	0	0
Pectobacterium brasiliense	1	0	0	0	0	0	0	0	0	0
Pectobacterium carotovorum	1	0	1	0	1	0	0	0	0	0
Pedobacter chitinilyticus	1	0	0	0	0	0	0	0	0	0
Pedobacter cryoconitis	1	0	0	0	1	0	0	0	0	0
Pedobacter ginsengisoli	1	0	1	0	1	1	0	0	0	0
Pedobacter lusitanus	1	0	0	0	0	0	0	0	0	0
Pedobacter sp.	1	0	1	0	0	0	0	0	0	0
Pedobacter sp. G11	1	0	1	0	1	0	0	0	0	0
Pedobacter sp. KBS0701	1	0	0	0	1	0	0	0	0	0
Pedobacter sp. PACM 27299	1	0	0	0	1	0	0	0	0	0
Pedobacter sp. R9.64	1	0	0	0	0	0	0	0	0	0
Pedobacter sp. Tibet-YD5003-2	1	0	0	0	0	0	0	0	0	0
Pedobacter sp. eg	1	0	0	0	0	1	0	0	0	0
Pedobacter steynii	1	0	0	0	1	0	0	0	0	0
Pedosphaera parvula	1	0	0	0	1	1	0	0	0	0
Pelagibacterium halotolerans	1	0	0	0	0	0	0	0	0	0
Pelobacter propionicus	1	0	0	0	0	0	0	0	0	0
Pelolinea submarina	1	0	0	0	1	0	0	0	0	0
Pelosinus fermentans	1	0	0	0	0	0	0	0	0	0
Pelosinus sp. UFO1	1	0	0	0	0	0	0	0	0	0
Peptococcus niger	1	0	1	0	0	1	0	0	0	0
Peptococcus sp.	1	0	0	0	0	0	0	0	0	0
Peptococcus sp. S9 Pr-12	1	0	0	0	0	0	0	0	0	0
Peptoniphilus harei	1	0	1	1	1	1	0	0	0	0
Peptoniphilus ivorii	1	0	0	0	1	1	0	0	0	0
Peptoniphilus pacaensis	1	0	0	0	0	0	0	0	0	0
Peptoniphilus sp. ING2-D1G	1	0	0	0	0	0	0	0	0	0
Peptoniphilus sp. MML-09-272	1	0	0	0	0	0	0	0	0	0
Peptoniphilus sp. Marseille-P3761	1	0	0	0	1	0	0	0	0	0
Peptoniphilus sp. S467	1	0	0	0	0	0	0	0	0	0
Peptoniphilus sp. S481	1	0	0	0	0	0	0	0	0	0
Peptostreptococcaceae bacterium oral taxon 929	1	0	0	0	1	1	0	0	0	0
Peptostreptococcus anaerobius	1	0	0	0	0	0	0	0	0	0
Peptostreptococcus sp. Marseille-P4308	1	0	0	0	0	0	0	0	0	0
Petrimonas mucosa	1	0	0	0	1	0	0	0	0	0
Petrocella atlantisensis	1	0	0	0	0	0	0	0	0	0
Phenylobacterium sp.	1	0	0	0	0	0	0	0	0	0
Phenylobacterium zucineum	1	1	0	0	0	0	0	1	0	0
Phoenicibacter congonensis	1	0	0	0	0	0	0	0	0	0
Phreatobacter cathodiphilus	1	0	0	0	1	0	0	0	0	0
Phreatobacter sp. NMCR1094	1	0	0	0	0	0	0	1	0	0
Phycicoccus dokdonensis	1	0	1	0	1	0	0	1	0	0
Phycisphaera mikurensis	1	0	0	0	1	0	0	1	0	0
Phycisphaerae bacterium RAS2	1	0	0	0	1	0	0	0	0	0
Phyllobacterium myrsinacearum	1	0	1	0	1	0	0	0	0	0
Phyllobacterium sp. T1293	1	0	1	0	0	0	0	0	0	0
Phyllobacterium zundukense	1	0	1	0	1	0	0	0	0	0
Pirellula sp. SH-Sr6A	1	0	0	0	1	0	0	0	0	0
Pirellula staleyi	1	0	0	0	1	0	0	0	0	0
Planctomyces sp. SH-PL14	1	0	0	0	1	0	0	0	0	0
Planctomyces sp. SH-PL62	1	0	1	1	1	1	0	0	0	0
Planctomycetes bacterium	1	0	0	0	1	0	0	0	0	0
Planctomycetes bacterium CA11	1	0	0	0	0	0	0	0	0	0
Planctomycetes bacterium ETA_A1	1	0	0	0	1	0	0	0	0	1
Planctomycetes bacterium ElP	1	0	0	0	1	0	0	0	0	0
Planctomycetes bacterium Enr13	1	0	0	0	0	0	0	0	0	0
Planctomycetes bacterium HG15A2	1	0	0	0	1	0	0	0	0	0
Planctomycetes bacterium I41	1	0	0	0	1	0	0	0	0	0
Planctomycetes bacterium K23_9	1	0	0	0	0	0	0	0	0	0
Planctomycetes bacterium KS4	1	0	0	0	0	0	0	0	0	0
Planctomycetes bacterium Mal4	1	0	0	0	0	0	0	0	0	0
Planctomycetes bacterium Mal48	1	0	0	0	0	0	0	0	0	0
Planctomycetes bacterium Mal52	1	0	0	0	0	0	0	0	0	0
Planctomycetes bacterium MalM25	1	0	0	0	1	0	0	0	0	0
Planctomycetes bacterium Pan153	1	0	0	0	1	0	0	0	0	0
Planctomycetes bacterium Pan181	1	0	0	1	1	1	0	0	0	0
Planctomycetes bacterium Pan189	1	0	0	0	0	0	0	0	0	0
Planctomycetes bacterium Pan216	1	0	0	0	1	0	0	0	0	0
Planctomycetes bacterium Pan44	1	0	0	0	1	0	0	0	0	0
Planctomycetes bacterium Pla110	1	0	0	0	0	0	0	1	0	0
Planctomycetes bacterium Pla163	1	0	0	0	0	0	0	0	0	0
Planctomycetes bacterium Pla175	1	0	0	0	0	0	0	0	0	0
Planctomycetes bacterium Pla85_3_4	1	0	0	0	1	0	0	0	0	0
Planctomycetes bacterium Pla86	1	0	0	0	1	0	0	0	0	0
Planctomycetes bacterium Q31a	1	0	0	0	1	0	0	0	0	0
Planctopirus ephydatiae	1	0	0	0	1	0	0	0	0	0
Planococcus citreus	1	0	0	0	0	0	0	0	0	0
Planococcus donghaensis	1	0	0	0	0	0	0	0	0	0
Planococcus halocryophilus	1	0	0	0	0	0	0	0	0	0
Planococcus kocurii	1	0	0	0	0	0	0	0	0	0
Planococcus maritimus	1	0	0	0	0	0	0	0	0	0
Planococcus massiliensis	1	0	1	0	1	0	0	0	0	0
Planomicrobium glaciei	1	0	0	0	1	0	0	0	0	0
Plantibacter flavus	1	0	0	0	0	0	0	1	0	0
Plautia stali symbiont	1	0	0	0	0	0	0	0	0	0
Pleomorphomonas sp. SM30	1	0	0	0	1	0	0	0	0	0
Polaribacter sp. ALD11	1	0	0	0	0	0	0	0	0	0
Polaribacter sp. KT25b	1	0	0	0	1	0	0	0	0	0
Polaribacter sp. MED152	1	0	0	0	0	0	0	0	0	0
Polaromonas sp. H12N	1	0	0	0	0	0	0	0	0	0
Polaromonas sp. SP1	1	0	1	0	1	0	0	0	0	0
Polaromonas sp. W7N	1	0	0	0	0	0	0	0	0	0
Polynucleobacter acidiphobus	1	0	1	0	0	0	0	1	0	0
Polynucleobacter asymbioticus	1	0	0	0	1	0	0	0	0	0
Polynucleobacter difficilis	1	0	0	0	1	0	0	0	0	0
Polynucleobacter duraquae	1	0	0	0	1	0	0	0	0	0
Polynucleobacter necessarius	1	0	1	0	1	0	0	0	0	0
Pontibacter actiniarum	1	0	0	0	1	0	0	0	0	0
Pontibacter akesuensis	1	0	0	0	0	0	0	0	0	0
Pontibacter korlensis	1	0	0	0	1	0	0	0	0	0
Pontimonas salivibrio	1	0	0	0	0	0	0	0	0	0
Porphyrobacter sp. LM 6	1	0	0	0	0	0	0	0	0	0
Porphyrobacter sp. YT40	1	0	1	0	0	0	0	0	0	0
Porphyromonas asaccharolytica	1	0	0	1	0	1	0	0	0	0
Porphyromonas cangingivalis	1	0	1	0	0	1	1	0	0	0
Porphyromonas crevioricanis	1	0	1	1	0	0	0	0	0	0
Porphyromonas gingivalis	1	0	1	1	1	1	0	0	0	0
Porphyromonas pasteri	1	0	0	0	0	0	0	0	0	0
Prevotella amnii	1	0	0	0	0	0	0	0	0	0
Prevotella colorans	1	0	0	0	0	0	0	0	0	0
Prevotella dentalis	1	0	0	0	0	0	0	0	0	0
Prevotella denticola	1	0	0	1	0	1	0	1	0	0
Prevotella enoeca	1	0	0	1	0	0	0	0	0	0
Prevotella fusca	1	0	1	0	0	0	0	0	0	0
Prevotella intermedia	1	0	1	1	1	1	0	0	0	0
Prevotella jejuni	1	0	1	1	0	1	1	0	0	0
Prevotella melaninogenica	1	1	1	1	1	1	1	0	0	1
Prevotella nigrescens	1	0	0	0	0	0	0	0	0	0
Prevotella oris	1	0	0	1	1	1	0	0	0	0
Prevotella ruminicola	1	0	0	1	0	1	0	0	0	0
Prevotella scopos	1	1	1	1	1	1	0	0	0	0
Prevotella sp. Marseille-P4334	1	0	0	0	0	0	0	0	0	0
Prevotella sp. Sc00026	1	0	0	0	1	0	0	0	0	0
Prevotella sp. oral taxon 299	1	0	1	1	1	1	0	0	0	0
Prevotella timonensis	1	0	0	0	0	0	0	0	0	0
Prevotellaceae bacterium	1	0	0	0	0	0	0	0	0	0
Promicromonospora sp.	1	0	0	0	0	0	0	0	0	0
Propionibacterium sp. Marseille-P4323	1	0	0	0	0	0	0	0	0	0
Propionibacterium sp. oral taxon 193	1	1	1	0	1	0	1	1	0	1
Propionimicrobium sp. Marseille-P3275	1	0	0	0	0	0	0	0	0	0
Prosthecobacter debontii	1	0	0	0	1	0	0	0	0	0
Prosthecobacter dejongeii	1	0	0	0	1	0	0	0	0	0
Prosthecobacter fusiformis	1	0	0	0	1	0	0	0	0	0
Prosthecobacter vanneervenii	1	0	0	0	1	0	0	0	0	0
Prosthecochloris aestuarii	1	0	0	0	0	0	0	0	0	0
Prosthecochloris sp. GSB1	1	0	0	0	0	0	0	0	0	0
Protaetiibacter intestinalis	1	0	1	0	0	0	0	1	0	0
Providencia stuartii	1	0	0	0	1	0	0	0	0	0
Pseudanabaena sp. ABRG5-3	1	0	0	0	1	0	0	0	0	0
Pseudanabaena sp. PCC 7367	1	0	0	0	0	0	0	0	0	0
Pseudarthrobacter equi	1	0	1	0	1	0	0	0	0	0
Pseudarthrobacter sp. NIBRBAC000502770	1	0	1	0	1	0	0	0	0	0
Pseudarthrobacter sp. NIBRBAC000502772	1	0	0	0	0	1	0	0	0	0
Pseudoalteromonas sp. R3	1	0	0	0	0	0	0	0	0	0
Pseudoalteromonas spongiae	1	0	0	0	0	0	0	0	0	0
Pseudobacter ginsenosidimutans	1	0	0	0	1	0	0	0	0	0
Pseudolabrys sp. FHR47	1	0	0	0	0	0	0	0	0	0
Pseudomonas aeruginosa	1	0	1	0	1	1	0	1	0	0
Pseudomonas agarici	1	0	0	0	0	0	0	1	0	0
Pseudomonas alcaligenes	1	0	1	0	1	0	0	1	0	0
Pseudomonas alcaliphila	1	0	1	0	1	0	0	1	0	0
Pseudomonas antarctica	1	0	0	1	0	1	0	1	0	0
Pseudomonas azotoformans	1	1	1	0	1	1	0	1	0	1
Pseudomonas chlororaphis	1	0	1	0	1	0	0	1	0	0
Pseudomonas citronellolis	1	0	1	0	0	0	0	1	0	0
Pseudomonas entomophila	1	0	1	0	0	0	0	1	0	0
Pseudomonas extremorientalis	1	0	1	0	0	0	0	1	0	0
Pseudomonas fluorescens	1	1	1	0	1	0	1	1	0	0
Pseudomonas fragi	1	0	0	0	0	0	0	1	0	0
Pseudomonas frederiksbergensis	1	1	0	0	0	0	0	1	0	0
Pseudomonas fulva	1	0	1	0	0	1	0	1	0	0
Pseudomonas knackmussii	1	0	1	0	0	0	0	1	0	0
Pseudomonas kuykendallii	1	0	0	0	0	0	1	0	0	0
Pseudomonas lini	1	0	0	0	0	0	0	0	0	0
Pseudomonas litoralis	1	0	0	0	1	0	0	0	0	0
Pseudomonas lundensis	1	0	1	0	0	0	0	0	0	0
Pseudomonas marincola	1	0	0	0	0	0	0	0	0	0
Pseudomonas mendocina	1	0	1	1	1	1	0	1	0	1
Pseudomonas orientalis	1	0	1	0	1	1	0	1	0	0
Pseudomonas oryzihabitans	1	0	1	0	0	0	0	0	0	0
Pseudomonas plecoglossicida	1	0	1	1	0	1	0	0	0	0
Pseudomonas protegens	1	1	0	0	0	0	0	1	0	0
Pseudomonas psychrophila	1	0	0	0	0	0	0	0	0	0
Pseudomonas psychrotolerans	1	0	1	0	0	0	0	1	0	0
Pseudomonas putida	1	1	1	0	1	1	1	1	0	1
Pseudomonas rhodesiae	1	0	1	0	0	0	0	1	0	0
Pseudomonas salegens	1	0	0	0	0	0	0	0	0	0
Pseudomonas sihuiensis	1	0	1	0	1	1	0	1	0	0
Pseudomonas sp.	1	0	1	0	1	1	0	1	0	1
Pseudomonas sp. 09C 129	1	0	0	0	0	0	0	1	0	0
Pseudomonas sp. ATCC 43928	1	0	1	0	1	0	0	0	0	0
Pseudomonas sp. BJP69	1	1	1	0	1	0	0	1	0	0
Pseudomonas sp. FDAARGOS_380	1	0	1	0	1	0	0	1	0	0
Pseudomonas sp. K2W31S-8	1	0	1	0	0	0	0	1	0	0
Pseudomonas sp. KBS0707	1	1	1	1	0	1	0	0	0	1
Pseudomonas sp. LH1G9	1	0	0	0	1	0	0	1	0	0
Pseudomonas sp. LTGT-11-2Z	1	0	1	0	0	1	0	0	0	0
Pseudomonas sp. LTJR-52	1	0	0	0	1	0	0	0	0	0
Pseudomonas sp. Lz4W	1	0	0	0	0	0	0	1	0	0
Pseudomonas sp. MPC6	1	0	0	0	1	0	0	0	0	0
Pseudomonas sp. MT-1	1	0	0	0	1	0	0	0	0	0
Pseudomonas sp. NIBRBAC000502773	1	0	1	0	0	0	0	1	0	0
Pseudomonas sp. S09G 359	1	0	0	0	0	0	0	1	0	0
Pseudomonas sp. S150	1	0	0	0	0	0	0	0	0	0
Pseudomonas sp. SGAir0191	1	0	1	0	0	0	0	0	0	0
Pseudomonas sp. SWI44	1	0	0	0	0	0	0	1	0	0
Pseudomonas sp. SWI7	1	0	0	0	0	0	0	0	0	0
Pseudomonas sp. SXM-1	1	1	1	1	0	0	0	1	0	0
Pseudomonas sp. StFLB209	1	0	1	0	1	0	0	0	0	0
Pseudomonas sp. URMO17WK12:I11	1	0	1	0	0	0	0	0	0	0
Pseudomonas sp. phDV1	1	1	1	1	1	1	0	1	0	0
Pseudomonas stutzeri	1	1	1	0	1	0	1	1	0	1
Pseudomonas synxantha	1	1	1	0	1	0	0	1	0	0
Pseudomonas syringae	1	1	1	0	1	0	0	1	0	0
Pseudomonas xanthomarina	1	0	0	0	1	1	0	1	0	0
Pseudomonas yamanorum	1	0	0	0	0	1	0	1	0	0
Pseudonocardia autotrophica	1	0	1	0	0	0	0	1	0	0
Pseudonocardia dioxanivorans	1	0	1	0	1	1	0	0	0	0
Pseudonocardia sp. HH130630-07	1	0	0	0	0	0	0	1	0	0
Pseudopedobacter saltans	1	0	0	0	0	0	0	0	0	0
Pseudopropionibacterium propionicum	1	0	1	0	1	0	0	0	0	0
Pseudorhodoplanes sinuspersici	1	0	0	0	0	0	0	0	0	0
Pseudothermotoga hypogea	1	0	0	0	0	0	0	0	0	0
Pseudoxanthomonas sp. ALBL_145	1	0	0	0	0	0	0	0	0	0
Pseudoxanthomonas sp. SV 2	1	0	0	0	0	0	0	0	0	0
Pseudoxanthomonas suwonensis	1	0	1	0	1	0	0	0	0	0
Pseudoxanthomonas wuyuanensis	1	0	0	0	0	0	0	0	0	0
Psychrobacillus insolitus	1	0	0	0	0	0	0	0	0	0
Psychrobacter cryohalolentis	1	0	0	0	0	0	0	0	0	0
Psychrobacter pulmonis	1	0	0	0	0	0	0	0	0	0
Psychrobacter sp.	1	0	0	0	0	0	0	0	0	0
Psychrobacter sp. AntiMn-1	1	0	0	0	0	0	0	0	0	1
Psychrobacter sp. YP14	1	0	0	0	0	0	0	0	0	0
Psychrobacter urativorans	1	0	0	0	0	0	0	0	0	0
Pulveribacter suum	1	0	1	0	0	0	0	0	0	0
Raineya orbicola	1	0	0	0	0	0	0	0	0	0
Ralstonia insidiosa	1	1	1	1	1	1	0	1	0	0
Ralstonia mannitolilytica	1	1	0	1	1	0	0	1	0	0
Ralstonia pickettii	1	1	1	1	1	0	0	1	0	0
Ralstonia solanacearum	1	0	1	1	1	0	0	1	0	0
Ralstonia sp.	1	0	0	0	0	0	0	0	0	0
Ralstonia syzygii	1	0	0	0	0	0	0	0	0	0
Ramlibacter tataouinensis	1	1	1	0	1	0	1	0	0	0
Raoultella electrica	1	0	1	0	0	1	0	0	0	0
Rathayibacter festucae	1	0	0	0	0	0	0	1	0	0
Rathayibacter iranicus	1	1	0	0	0	0	0	1	0	0
Rathayibacter rathayi	1	0	0	0	0	1	0	1	0	0
Rathayibacter toxicus	1	0	0	0	0	0	0	1	0	0
Renibacterium salmoninarum	1	0	0	0	0	0	0	0	0	0
Reyranella sp.	1	0	0	0	0	0	0	0	0	0
Rheinheimera sp.	1	0	0	0	0	0	0	0	0	0
Rheinheimera sp. D18	1	0	0	0	1	0	0	0	0	0
Rheinheimera sp. F8	1	0	1	0	0	0	0	0	0	0
Rheinheimera sp. LHK132	1	0	1	0	1	0	0	0	0	1
Rhizobacter gummiphilus	1	0	1	0	1	1	1	0	0	0
Rhizobiales bacterium NRL2	1	0	0	0	0	0	0	0	0	0
Rhizobium leguminosarum	1	0	0	0	1	0	0	1	0	0
Rhizobium pusense	1	0	1	0	1	0	0	0	0	0
Rhizobium sp.	1	0	1	0	0	0	0	0	0	0
Rhizobium sp. ACO-34A	1	0	0	0	1	0	0	1	0	0
Rhizobium sp. Khangiran2	1	1	0	0	0	0	0	0	0	0
Rhizobium sp. Q54	1	0	0	0	0	0	0	0	0	0
Rhizorhabdus dicambivorans	1	0	0	1	0	0	0	0	0	0
Rhodanobacter sp.	1	0	0	0	0	0	0	0	0	0
Rhodobacter capsulatus	1	0	1	0	0	0	0	0	0	0
Rhodobacter sp.	1	0	0	0	0	0	0	0	0	0
Rhodobacter sp. SL24	1	0	0	0	0	0	0	0	0	0
Rhodobacter sphaeroides	1	0	1	0	0	0	0	1	0	0
Rhodobacter veldkampii	1	0	0	0	0	0	0	0	0	1
Rhodobacteraceae bacterium	1	0	1	1	1	0	0	1	0	0
Rhodobacteraceae bacterium SH-1	1	0	0	0	0	0	0	0	0	0
Rhodococcus erythropolis	1	0	0	0	1	0	0	0	0	0
Rhodococcus fascians	1	0	1	0	1	0	0	0	0	0
Rhodococcus jostii	1	0	0	0	0	0	0	0	0	0
Rhodococcus pyridinivorans	1	1	0	0	0	0	0	0	0	0
Rhodococcus qingshengii	1	1	1	0	1	0	0	0	0	0
Rhodococcus ruber	1	0	1	0	1	0	0	0	0	0
Rhodococcus sp.	1	0	0	0	0	0	0	0	0	0
Rhodococcus sp. 008	1	0	0	0	1	0	0	0	0	0
Rhodococcus sp. BH4	1	0	0	0	0	0	0	0	0	0
Rhodococcus sp. H-CA8f	1	1	0	0	0	0	0	1	0	0
Rhodococcus sp. NJ-530	1	1	1	0	1	1	0	0	0	0
Rhodococcus sp. WB9	1	1	1	0	0	0	1	0	0	0
Rhodococcus sp. X156	1	0	0	0	1	0	0	0	0	0
Rhodococcus sp. YL-1	1	0	0	0	0	0	0	0	0	0
Rhodocyclaceae bacterium SHINM1	1	0	0	0	1	0	0	0	0	0
Rhodoferax antarcticus	1	0	1	0	0	0	0	0	0	0
Rhodoferax ferrireducens	1	0	1	1	0	0	0	0	0	0
Rhodoferax koreense	1	0	1	0	1	0	0	0	0	0
Rhodoferax sp. CHu59-6-5	1	0	0	0	1	0	0	0	0	1
Rhodoferax sp. Gr-4	1	0	1	0	1	0	0	0	0	0
Rhodoluna lacicola	1	0	0	0	1	1	0	0	0	0
Rhodopseudomonas palustris	1	0	1	1	1	0	0	1	0	0
Rhodospirillaceae bacterium	1	0	0	0	0	0	0	0	0	0
Rhodospirillum rubrum	1	0	0	0	0	0	0	0	0	0
Rhodothermaceae bacterium	1	0	1	0	1	0	0	0	0	0
Rhodothermaceae bacterium RA	1	0	0	0	0	0	0	0	0	0
Rickettsia asiatica	1	0	0	0	1	0	0	0	0	0
Rickettsia endosymbiont of Bemisia tabaci	1	0	0	0	0	0	0	0	0	0
Rickettsia felis	1	0	0	0	0	0	0	0	0	0
Rickettsia massiliae	1	0	0	0	0	0	0	0	0	0
Rickettsiella endosymbiont of Ixodes ricinus	1	0	0	0	0	0	0	0	0	0
Riemerella anatipestifer	1	0	1	0	1	0	0	1	0	0
Romboutsia hominis	1	0	1	1	1	1	0	0	0	0
Romboutsia ilealis	1	0	1	0	1	1	0	0	0	0
Roseateles depolymerans	1	0	1	0	1	0	1	1	0	0
Roseburia hominis	1	0	0	0	0	1	0	0	0	1
Roseburia intestinalis	1	0	1	0	1	1	1	0	0	0
Roseiflexus castenholzii	1	0	1	0	0	0	0	0	0	0
Roseiflexus sp. RS-1	1	0	0	0	0	0	0	0	0	0
Roseomonas gilardii	1	0	1	1	1	1	1	0	0	0
Roseomonas mucosa	1	1	1	1	1	1	1	0	0	0
Roseomonas sp.	1	1	0	0	1	0	0	0	0	0
Roseomonas sp. Atb2	1	0	0	0	0	0	0	0	0	0
Roseomonas sp. FDAARGOS_362	1	0	1	1	0	0	0	0	0	0
Roseomonas sp. Pao52	1	0	0	0	0	0	0	0	0	0
Rothia aeria	1	0	0	0	1	0	0	0	0	0
Rothia dentocariosa	1	1	1	1	1	1	1	1	0	0
Rothia mucilaginosa	1	1	1	1	1	1	1	1	0	0
Rubellimicrobium sp.	1	0	0	0	0	0	0	0	0	1
Rubinisphaera brasiliensis	1	0	0	0	0	0	0	0	0	0
Rubrivivax gelatinosus	1	0	1	0	1	0	0	0	0	1
Ruegeria pomeroyi	1	0	1	0	1	0	0	0	0	0
Rufibacter sp. DG31D	1	0	0	0	1	0	0	0	0	0
Ruminiclostridium cellulolyticum	1	0	0	0	0	0	0	0	0	0
Ruminococcus bicirculans	1	0	0	0	1	1	0	0	0	0
Ruminococcus champanellensis	1	0	0	0	1	1	0	0	0	0
Ruminococcus sp. JE7A12	1	0	1	0	1	0	0	0	0	0
Runella sp. HYN0085	1	0	0	0	0	0	0	0	0	0
Runella sp. SP2	1	0	0	0	0	0	0	0	0	0
Ruthenibacterium lactatiformans	1	0	0	1	0	1	0	0	0	0
Saccharibacillus brassicae	1	0	0	0	0	0	0	1	0	0
Saccharomonospora sp. 31sw	1	0	0	0	0	0	0	0	0	0
Saccharopolyspora erythraea	1	0	0	0	0	0	0	0	0	0
Saccharothrix sp.	1	0	0	0	0	0	0	0	0	0
Salegentibacter sp. T436	1	0	0	0	0	0	0	0	0	0
Salinibacterium sp.	1	0	0	0	0	0	0	0	0	0
Salinibacterium sp. CGMCC 1.16371	1	0	0	0	0	0	0	1	0	0
Salinibacterium sp. UTAS2018	1	0	1	0	0	0	0	0	0	0
Salinicoccus halodurans	1	0	0	0	1	0	0	0	0	0
Salinicoccus sp. BAB 3246	1	0	0	0	1	0	0	0	0	0
Salinicoccus sp. YB14-2	1	0	0	0	0	0	0	0	0	0
Salinicola salarius	1	0	0	0	0	0	0	0	0	0
Salinicola tamaricis	1	0	0	0	0	0	0	0	0	0
Salinimicrobium sp.	1	0	0	0	0	0	0	0	0	0
Salinimicrobium sp. VITPRS30	1	0	0	0	0	0	0	0	0	0
Salinivirga cyanobacteriivorans	1	0	0	0	0	0	0	0	0	0
Salmonella enterica	1	1	1	0	0	1	0	1	0	1
Sandaracinus amylolyticus	1	0	1	0	0	0	0	0	0	0
Sanguibacter keddieii	1	0	0	0	1	0	0	0	0	0
Sanguibacter sp.	1	0	0	0	0	0	0	0	0	0
Saprospira grandis	1	0	0	0	1	0	0	0	0	0
Schaalia cardiffensis	1	0	0	0	0	0	0	0	0	0
Schaalia odontolytica	1	1	1	1	1	1	0	1	0	0
Schaalia radingae	1	0	0	0	1	0	0	0	0	0
Scytonema hyalinum	1	0	0	0	0	0	0	0	0	0
Sediminihabitans luteus	1	0	0	0	0	0	0	0	0	0
Selenomonas massiliensis	1	0	0	0	0	0	0	0	0	0
Selenomonas sp. oral taxon 136	1	0	0	1	0	0	0	0	0	0
Selenomonas sp. oral taxon 478	1	0	1	0	0	0	0	0	0	0
Selenomonas sp. oral taxon 920	1	0	0	0	1	0	0	0	0	0
Serinicoccus sp. JLT9	1	0	0	0	0	0	0	0	0	0
Serpentinomonas mccroryi	1	0	1	0	0	0	0	0	0	0
Serpentinomonas raichei	1	1	1	0	0	0	0	0	0	1
Serratia liquefaciens	1	0	1	0	0	0	1	0	0	1
Serratia marcescens	1	1	1	1	1	1	0	1	0	0
Shewanella decolorationis	1	0	1	0	1	0	0	1	0	0
Shewanella putrefaciens	1	0	1	0	1	0	0	0	0	1
Shewanella sp. FDAARGOS_354	1	0	0	0	1	0	0	1	0	0
Shewanella xiamenensis	1	0	0	0	0	0	0	0	0	0
Shigella boydii	1	0	0	0	1	1	0	1	0	0
Shigella flexneri	1	0	0	1	0	1	1	0	0	0
Shigella sonnei	1	0	0	0	0	0	1	1	0	0
Shinella sp. HZN7	1	0	1	0	1	0	0	0	0	0
Shinella zoogloeoides	1	0	0	0	0	0	0	0	0	0
Silvanigrellales bacterium RF1110005	1	0	0	0	1	0	0	0	0	0
Simonsiella muelleri	1	0	0	0	1	0	0	0	0	0
Singulisphaera acidiphila	1	0	1	1	1	1	0	0	0	0
Sinorhizobium fredii	1	0	1	0	1	1	0	0	0	0
Sinorhizobium medicae	1	0	0	0	1	0	0	0	0	0
Sinorhizobium sp. RAC02	1	0	1	0	0	0	0	0	0	0
Siphonobacter sp. enrichment culture	1	0	0	0	0	0	0	0	0	1
Skermanella rosea	1	0	0	0	0	0	0	0	0	0
Skermanella sp.	1	0	0	1	0	0	0	0	0	0
Slackia heliotrinireducens	1	0	0	0	0	1	0	0	0	0
Solibacillus silvestris	1	0	0	0	0	0	0	0	0	0
Solibacillus sp. R5-41	1	0	0	0	1	0	0	0	0	0
Solimonas sp. K1W22B-7	1	0	0	0	1	0	0	1	0	0
Solitalea canadensis	1	0	0	0	1	0	0	0	0	0
Sorangium cellulosum	1	0	1	0	1	0	0	0	0	0
Sphaerobacter thermophilus	1	0	0	0	1	0	0	0	0	0
Sphingobacterium daejeonense	1	0	1	0	1	0	0	1	0	0
Sphingobacterium mizutaii	1	0	0	0	1	0	0	0	0	0
Sphingobacterium psychroaquaticum	1	0	0	0	1	0	0	0	0	1
Sphingobacterium sp. 21	1	0	0	0	1	0	0	0	0	0
Sphingobacterium sp. B29	1	0	0	0	0	0	0	0	0	0
Sphingobacterium sp. G1-14	1	0	1	0	0	0	0	1	0	0
Sphingobacterium thalpophilum	1	0	0	0	1	0	0	1	0	0
Sphingobium amiense	1	0	0	0	1	0	0	0	0	0
Sphingobium cloacae	1	0	0	0	0	0	0	0	0	0
Sphingobium hydrophobicum	1	0	0	0	0	0	0	0	0	0
Sphingobium sp. LF-16	1	0	1	0	1	0	0	0	0	0
Sphingobium sp. MI1205	1	0	0	0	0	0	0	0	0	0
Sphingobium sp. PAMC28499	1	0	0	1	0	1	0	1	0	0
Sphingobium sp. SCG-1	1	0	1	0	1	0	0	0	0	0
Sphingobium sp. SYK-6	1	0	1	0	1	0	0	0	0	0
Sphingobium sp. YG1	1	0	1	0	0	0	0	0	0	0
Sphingobium yanoikuyae	1	0	1	1	1	1	0	1	0	0
Sphingomonadaceae bacterium	1	0	0	0	0	0	0	0	0	0
Sphingomonas changbaiensis	1	0	0	0	0	0	0	0	0	0
Sphingomonas endophytica	1	0	0	0	0	0	0	0	0	0
Sphingomonas indica	1	0	0	0	1	1	0	0	0	0
Sphingomonas kaistensis	1	0	0	0	0	0	0	0	0	0
Sphingomonas koreensis	1	0	1	0	1	0	0	1	0	0
Sphingomonas leidyi	1	0	0	0	0	0	0	0	0	0
Sphingomonas melonis	1	1	1	1	1	0	0	1	0	0
Sphingomonas panacis	1	0	1	0	1	1	1	1	0	1
Sphingomonas paucimobilis	1	1	1	0	1	0	0	1	0	1
Sphingomonas sanguinis	1	1	0	0	1	0	0	0	0	0
Sphingomonas sanxanigenens	1	0	0	0	1	0	0	0	0	0
Sphingomonas sp.	1	1	0	1	1	0	1	0	0	1
Sphingomonas sp. ALBL_100	1	1	0	0	0	0	0	0	0	0
Sphingomonas sp. ALBL_142	1	0	0	0	0	0	0	0	0	0
Sphingomonas sp. C8-2	1	1	1	0	1	0	0	1	0	1
Sphingomonas sp. CC-MHH0546	1	0	0	0	0	0	0	0	0	0
Sphingomonas sp. Cra20	1	0	1	0	1	0	0	0	0	0
Sphingomonas sp. FARSPH	1	1	1	0	1	0	0	0	0	0
Sphingomonas sp. GR 7-02	1	0	0	0	0	0	0	0	0	0
Sphingomonas sp. HKS19	1	1	1	0	1	1	0	0	0	1
Sphingomonas sp. IC081	1	0	1	1	0	1	0	0	0	0
Sphingomonas sp. LK11	1	0	1	0	1	1	0	0	0	0
Sphingomonas sp. NIC1	1	1	1	0	1	0	0	0	0	0
Sphingomonas sp. PAMC26645	1	0	1	1	1	1	0	0	0	0
Sphingomonas sp. SL9	1	0	1	0	1	0	0	0	0	0
Sphingomonas sp. UR 7-12	1	0	0	0	0	0	0	0	0	0
Sphingomonas sp. XS-10	1	0	1	0	1	0	0	0	0	1
Sphingomonas taxi	1	1	1	0	1	1	1	0	0	1
Sphingopyxis bauzanensis	1	0	0	0	0	0	0	0	0	0
Sphingopyxis sp. LPB0140	1	0	0	1	0	0	0	0	0	0
Sphingopyxis sp. PAMC25046	1	0	0	0	1	0	0	0	0	0
Sphingopyxis sp. QXT-31	1	0	0	0	0	0	0	0	0	0
Sphingopyxis terrae	1	0	0	0	0	0	0	0	0	0
Sphingorhabdus sp. Alg231-15	1	0	0	0	0	0	0	0	1	0
Sphingosinicella sp. BN140058	1	0	1	0	1	0	0	0	0	0
Spirirestis rafaelensis	1	0	0	0	0	0	0	0	0	0
Spirochaeta aurantia	1	0	0	0	1	0	0	0	0	0
Spirochaeta thermophila	1	0	1	0	0	0	0	0	0	0
Spiroplasma apis	1	0	0	0	0	0	0	0	0	0
Spiroplasma eriocheiris	1	0	0	0	0	0	0	0	0	0
Spiroplasma melliferum	1	0	0	0	1	0	0	0	0	0
Spirosoma agri	1	0	0	0	0	0	0	0	0	0
Spirosoma linguale	1	0	0	0	1	0	0	0	0	0
Spirosoma pollinicola	1	0	1	0	1	0	0	0	0	0
Spirosoma radiotolerans	1	0	0	0	0	0	0	0	0	0
Spirosoma rigui	1	0	0	0	1	0	0	0	0	0
Spirosoma sp. KCTC 42546	1	0	0	0	1	0	0	0	0	0
Spirosoma sp. R-38337	1	0	0	0	0	0	0	0	0	0
Sporomusa termitida	1	0	0	0	0	0	0	0	0	0
Stackebrandtia nassauensis	1	0	0	0	0	0	0	1	0	0
Stanieria sp. NIES-3757	1	0	0	0	0	0	0	0	0	0
Staphylococcus agnetis	1	0	0	0	0	0	0	0	0	0
Staphylococcus arlettae	1	0	0	0	0	0	0	0	0	0
Staphylococcus aureus	1	0	1	1	1	1	0	1	0	0
Staphylococcus capitis	1	0	1	0	1	1	0	1	0	1
Staphylococcus cohnii	1	1	1	1	1	1	0	1	0	0
Staphylococcus epidermidis	1	1	1	1	1	1	1	1	0	0
Staphylococcus equorum	1	0	1	0	0	0	0	0	0	0
Staphylococcus gallinarum	1	0	0	0	0	0	0	0	0	0
Staphylococcus hominis	1	1	1	1	1	1	1	1	0	1
Staphylococcus nepalensis	1	1	0	0	0	0	0	0	0	0
Staphylococcus pasteuri	1	0	1	0	1	0	0	1	0	0
Staphylococcus pettenkoferi	1	0	1	0	1	0	0	0	0	0
Staphylococcus saprophyticus	1	0	1	0	1	0	0	1	0	0
Staphylococcus sciuri	1	0	0	0	1	0	0	1	0	0
Staphylococcus sp.	1	0	1	0	1	0	0	0	0	1
Staphylococcus sp. M0911	1	0	1	0	0	0	0	1	0	0
Staphylococcus stepanovicii	1	0	0	0	0	0	0	0	0	0
Staphylococcus warneri	1	0	1	0	1	1	1	1	0	1
Staphylospora marina	1	0	0	0	0	0	0	0	0	0
Stappia indica	1	0	0	0	0	0	0	0	0	0
Starkeya novella	1	0	1	0	0	1	0	0	0	0
Stella sp. ATCC 35155	1	0	0	0	1	0	0	1	0	0
Stella vacuolata	1	0	0	0	1	0	0	1	0	0
Stenotrophomonas acidaminiphila	1	0	1	0	0	0	0	1	0	0
Stenotrophomonas maltophilia	1	0	1	0	1	1	1	1	0	1
Stenotrophomonas rhizophila	1	0	1	0	1	0	0	0	0	0
Stenotrophomonas sp.	1	0	0	0	0	0	0	0	0	0
Stenotrophomonas sp. DAIF1	1	0	1	0	0	0	0	0	0	1
Stenotrophomonas sp. pho	1	0	0	0	1	1	0	1	0	1
Steroidobacter denitrificans	1	0	0	0	1	1	0	0	0	0
Sterolibacteriaceae bacterium M52	1	0	1	0	0	0	0	0	0	0
Sterolibacterium denitrificans	1	0	1	0	1	0	0	0	0	0
Stigmatella aurantiaca	1	0	1	0	0	0	0	1	0	0
Stigmatella erecta	1	0	0	0	0	0	0	0	0	0
Streptococcaceae bacterium	1	0	0	0	0	0	0	0	0	0
Streptococcus agalactiae	1	0	0	0	0	1	0	0	0	0
Streptococcus australis	1	0	1	1	1	1	0	0	0	0
Streptococcus cristatus	1	1	1	0	1	0	0	0	0	0
Streptococcus dysgalactiae	1	0	1	0	0	0	0	0	0	0
Streptococcus equinus	1	1	0	0	1	1	0	0	0	1
Streptococcus ferus	1	0	0	0	0	0	0	0	0	0
Streptococcus gordonii	1	1	1	1	1	1	0	0	0	0
Streptococcus gwangjuense	1	1	1	1	1	1	1	0	0	0
Streptococcus himalayensis	1	0	0	0	1	0	0	0	0	0
Streptococcus infantarius	1	0	1	0	1	0	0	0	0	0
Streptococcus infantis	1	1	0	0	0	1	0	0	0	0
Streptococcus koreensis	1	0	1	1	1	1	0	0	0	0
Streptococcus lutetiensis	1	1	0	1	0	1	0	0	0	0
Streptococcus milleri	1	0	1	1	1	1	0	0	0	0
Streptococcus mitis	1	0	1	1	1	1	1	0	0	1
Streptococcus oralis	1	1	1	1	1	1	0	1	0	1
Streptococcus parasanguinis	1	1	1	1	1	1	0	0	0	0
Streptococcus pneumoniae	1	1	1	1	1	1	1	0	0	1
Streptococcus pseudopneumoniae	1	0	1	0	1	0	0	1	0	1
Streptococcus pyogenes	1	0	1	0	0	0	0	0	0	0
Streptococcus salivarius	1	0	1	1	1	1	1	0	0	0
Streptococcus sanguinis	1	1	1	1	1	1	0	1	0	0
Streptococcus sp. 1643	1	1	1	1	1	1	1	1	0	1
Streptococcus sp. A12	1	0	1	1	0	1	0	0	0	0
Streptococcus sp. VT 162	1	0	1	1	0	1	0	0	0	0
Streptococcus sp. oral taxon 064	1	0	1	1	0	1	0	0	0	0
Streptococcus sp. oral taxon 431	1	0	1	1	1	1	0	0	0	1
Streptococcus suis	1	0	1	0	1	0	0	0	0	0
Streptococcus thermophilus	1	1	1	0	1	1	1	0	0	0
Streptomonospora sp. M2	1	0	0	0	0	0	0	0	0	0
Streptomyces actuosus	1	0	0	0	0	0	0	0	0	0
Streptomyces albogriseolus	1	0	0	0	0	0	0	0	0	0
Streptomyces ambofaciens	1	0	0	0	0	0	0	0	0	0
Streptomyces davaonensis	1	0	0	0	0	0	0	0	0	0
Streptomyces flavogriseus	1	0	0	0	0	0	0	0	0	0
Streptomyces fradiae	1	0	0	0	0	0	0	0	0	0
Streptomyces fulvissimus	1	0	0	0	0	0	0	0	0	0
Streptomyces globisporus	1	0	0	0	0	0	0	1	0	0
Streptomyces globosus	1	0	0	0	0	0	0	0	0	0
Streptomyces griseorubiginosus	1	0	0	0	0	0	0	0	0	0
Streptomyces griseus	1	0	0	0	0	0	0	0	0	0
Streptomyces hygroscopicus	1	0	0	0	0	0	0	1	0	0
Streptomyces lydicus	1	0	0	0	1	0	0	1	0	0
Streptomyces olivoreticuli	1	0	0	0	0	0	0	1	0	0
Streptomyces parvulus	1	0	0	0	0	0	0	0	0	0
Streptomyces qinzhouensis	1	0	0	0	0	0	0	0	0	0
Streptomyces rapamycinicus	1	0	0	0	0	0	0	0	0	0
Streptomyces reticuli	1	0	0	0	0	0	0	0	0	0
Streptomyces rimosus	1	0	0	0	0	0	0	0	0	0
Streptomyces seoulensis	1	0	0	0	0	0	0	0	0	0
Streptomyces sp.	1	0	0	0	0	0	0	0	0	0
Streptomyces sp. CB09001	1	0	0	0	0	0	0	0	0	0
Streptomyces sp. CNQ-509	1	0	0	0	0	0	0	0	0	0
Streptomyces sp. KPB2	1	0	0	0	0	0	0	1	0	0
Streptomyces sp. RLB1-8	1	0	0	0	0	0	0	1	0	0
Streptomyces sp. SCSIO 03032	1	0	1	0	0	0	0	0	0	0
Streptomyces sp. SirexAA-E	1	0	0	0	0	0	0	0	0	0
Streptomyces sp. TRM68005	1	0	0	0	0	0	0	0	0	0
Streptomyces sp. WAC6273	1	0	0	0	0	0	0	0	0	0
Streptomyces sp. WAC8241	1	0	1	0	0	0	0	0	0	0
Streptomyces sp. Z022	1	0	0	0	0	0	0	0	0	0
Streptomyces sp. ZFG47	1	0	0	0	0	0	0	0	0	0
Streptomyces sp. col6	1	0	0	0	0	0	0	0	0	0
Streptomyces spectabilis	1	0	0	0	0	0	0	0	0	0
Streptomyces turgidiscabies	1	0	0	0	0	0	0	0	0	0
Streptomyces variabilis	1	0	0	0	0	0	0	0	0	0
Streptomyces xiamenensis	1	0	0	0	0	0	0	0	0	0
Suicoccus acidiformans	1	0	1	0	1	0	0	0	0	0
Sulfobacillus acidophilus	1	0	0	0	0	0	0	0	0	0
Sulfuriferula sp. AH1	1	0	0	0	0	0	0	0	0	0
Sulfurihydrogenibium azorense	1	1	0	0	0	0	0	0	0	0
Sulfuritalea hydrogenivorans	1	0	0	0	1	0	0	0	0	0
Sulfurospirillum sp. JPD-1	1	0	0	0	1	0	0	0	0	0
Swingsia samuiensis	1	0	0	0	0	0	0	1	0	0
Swingsia sp. F3b2	1	0	0	0	0	0	0	0	0	0
Synechococcus elongatus	1	0	0	0	0	0	0	0	0	0
Synechococcus sp. PCC 6603	1	0	0	0	0	0	0	0	0	0
Synechocystis sp. BURR	1	0	0	0	0	0	0	0	0	0
Synechocystis sp. EERGCy-009	1	0	0	0	0	0	0	0	0	0
Synechocystis sp. IPPAS B-1465	1	0	0	0	1	0	0	0	0	0
Syntrophobacter fumaroxidans	1	0	0	0	0	0	0	0	0	0
TM7 phylum sp. oral taxon 957	1	0	0	1	1	1	0	0	0	0
Tabrizicola piscis	1	0	0	0	1	0	0	0	0	0
Tabrizicola sp.	1	0	0	0	0	0	0	0	0	0
Tamlana sp. UJ94	1	0	0	0	0	0	0	0	0	0
Tannerella forsythia	1	0	1	0	1	0	0	0	0	0
Tannerella sp. oral taxon HOT-286	1	0	1	1	1	1	0	0	0	0
Tardiphaga sp. vice352	1	0	1	0	0	0	0	1	0	0
Tenacibaculum maritimum	1	0	0	0	1	1	0	0	0	0
Tenacibaculum sp.	1	0	0	0	0	0	0	0	0	0
Tenacibaculum sp. DSM 106434	1	0	0	0	1	0	0	0	0	0
Tepidimonas sp.	1	0	0	0	0	0	0	0	0	0
Tepidimonas sp. PL12	1	0	0	0	0	0	0	0	0	0
Tepidiphilus sp. enrichment culture	1	0	0	0	0	0	0	0	0	0
Tepidiphilus succinatimandens	1	0	0	0	0	0	0	0	0	0
Terriglobus roseus	1	0	0	0	1	0	0	0	0	0
Tessaracoccus flavescens	1	0	0	0	1	0	0	1	0	0
Tessaracoccus flavus	1	0	0	0	0	0	0	1	0	0
Tessaracoccus sp. T2.5-30	1	0	0	0	1	0	0	0	0	0
Tessaracoccus timonensis	1	0	0	0	1	0	0	0	0	0
Thalassospira indica	1	0	1	0	0	0	0	0	0	0
Thauera humireducens	1	0	1	0	0	0	0	1	0	0
Thermanaeromonas toyohensis	1	0	0	0	0	0	0	1	0	0
Thermincola potens	1	0	0	0	0	0	0	0	0	0
Thermoanaerobacterium thermosaccharolyticum	1	0	0	0	0	0	0	1	0	0
Thermobaculum terrenum	1	0	0	0	0	0	0	0	0	0
Thermocrinis albus	1	0	0	0	0	0	0	0	0	0
Thermogemmatispora argillosa	1	0	0	0	1	0	0	0	0	0
Thermogutta terrifontis	1	0	0	0	1	0	0	0	0	0
[truncated: 1,901 more rows]

## Sheet: DarkAll_vs_ALL_upset_Bact_genus
ID	OurStudyALSblood	Linsley2014	Gagliardi2018	Brohawn2016	Ladd2017	Brohawn2019	Emanuel2020	Shin2014	Humphrys2016	VonSchack2018
Abiotrophia	1	0	0	0	1	0	0	0	0	0
Acetobacter	1	0	1	0	1	0	0	0	0	0
Acholeplasma	1	0	0	0	1	0	0	0	0	0
Achromobacter	1	0	1	0	1	0	0	0	0	0
Acidithiobacillus	1	0	0	0	1	0	0	0	0	0
Acidovorax	1	0	1	0	1	0	0	1	0	0
Acinetobacter	1	0	1	1	1	1	1	1	0	1
Actinoalloteichus	1	0	0	0	1	1	0	0	0	0
Actinobaculum	1	0	0	0	1	0	0	0	0	0
Actinocorallia	1	0	0	0	1	0	0	0	0	0
Actinomadura	1	0	0	0	1	0	0	0	0	0
Actinomyces	1	1	1	0	1	1	0	1	0	0
Actinoplanes	1	0	1	0	1	0	0	1	0	0
Advenella	1	0	1	0	1	0	0	0	0	0
Aequorivita	1	0	1	0	1	0	0	0	0	0
Aerococcus	1	0	1	0	1	0	0	1	0	0
Aeromicrobium	1	0	0	0	1	0	0	1	0	0
Aeromonas	1	0	1	0	1	0	0	0	0	0
Aggregatibacter	1	0	0	0	1	0	0	0	0	0
Agreia	1	0	0	0	1	0	0	1	0	0
Agrobacterium	1	0	1	0	1	0	0	0	0	0
Algoriphagus	1	0	1	1	1	0	0	0	0	0
Aliiroseovarius	1	0	0	0	1	0	0	0	0	0
Alishewanella	1	0	1	0	1	0	0	0	0	0
Alkalibacterium	1	0	1	0	1	0	0	1	0	0
Alkanindiges	1	0	0	0	1	0	0	0	0	0
Allisonella	1	0	0	0	0	0	0	0	0	0
Alloactinosynnema	1	0	0	0	1	0	0	0	0	0
Alloprevotella	1	0	1	0	1	0	0	0	0	0
Altererythrobacter	1	0	1	0	1	0	0	0	0	0
Amycolatopsis	1	0	0	0	1	0	0	1	0	0
Anabaena	1	0	0	0	1	0	0	0	0	0
Anaerococcus	1	0	1	0	1	1	1	0	0	0
Anaerosphaera	1	0	0	0	1	0	0	0	0	0
Anaerostipes	1	0	1	0	1	0	0	0	0	0
Anaerovibrio	1	0	0	0	1	0	0	0	0	0
Andreprevotia	1	0	0	0	0	0	0	0	0	0
Angelakisella	1	0	0	0	1	0	0	0	0	0
Aquimarina	1	0	0	0	1	0	0	0	0	0
Aquitalea	1	0	0	0	1	0	0	0	0	0
Archangium	1	0	1	0	1	0	0	0	0	0
Arcobacter	1	0	0	0	1	0	0	0	0	0
Arenibacter	1	0	0	0	1	0	0	0	0	0
Aromatoleum	1	0	0	0	1	0	0	0	0	0
Arsenicicoccus	1	0	0	0	1	0	0	0	0	0
Arthrobacter	1	0	1	1	1	1	0	1	0	0
Atopobium	1	0	1	0	1	0	0	0	0	0
Aureimonas	1	0	1	0	1	0	0	0	0	0
Austwickia	1	0	0	0	0	0	0	0	0	0
Azospirillum	1	0	1	0	1	0	0	0	0	0
Bacillus	1	0	1	0	1	1	0	1	0	0
Bacteroides	1	0	1	0	1	0	0	1	0	0
Bdellovibrio	1	0	0	0	1	0	1	1	0	0
Bifidobacterium	1	0	1	0	1	0	0	1	0	0
Bizionia	1	0	0	0	1	0	0	0	0	0
Blastochloris	1	0	0	0	1	0	0	0	0	0
Blastococcus	1	0	1	0	1	0	0	0	0	0
Blautia	1	0	1	0	1	1	0	0	0	0
Bordetella	1	0	1	0	1	0	0	0	0	0
Bosea	1	0	1	0	1	0	0	1	0	0
Brachybacterium	1	0	0	0	1	0	0	1	0	0
Bradyrhizobium	1	1	1	0	1	0	0	1	0	0
Bremerella	1	0	0	0	1	0	0	0	0	0
Brevibacillus	1	0	1	0	1	1	0	0	0	0
Brevibacterium	1	0	1	0	1	0	0	1	0	0
Brevundimonas	1	0	1	0	1	0	0	0	0	0
Burkholderia	1	1	1	0	1	1	0	1	0	0
Butyrivibrio	1	0	1	0	1	0	0	1	0	0
Caballeronia	1	0	0	0	1	0	0	0	0	0
Campylobacter	1	0	1	0	1	0	0	0	0	0
Candidatus Accumulibacter	1	0	1	0	1	0	0	1	0	0
Candidatus Berkiella	1	0	0	0	1	0	0	0	0	0
Candidatus Fonsibacter	1	0	0	0	0	0	0	0	0	0
Candidatus Scalindua	1	0	0	0	1	0	0	0	0	0
Candidatus Viridilinea	1	0	0	0	1	0	0	0	0	0
Cardiobacterium	1	0	0	0	1	0	0	0	0	0
Catenibacterium	1	1	0	0	1	0	0	0	0	0
Catonella	1	1	0	0	1	0	0	0	0	0
Caulobacter	1	0	1	0	1	0	0	0	0	0
Cellulomonas	1	0	1	0	1	0	0	1	0	0
Chitinophaga	1	0	1	1	1	0	0	0	0	0
Chlamydia	1	0	0	0	1	0	0	1	0	0
Chlorobium	1	0	1	0	1	0	0	0	0	0
Chromatocurvus	1	0	0	0	0	0	0	0	0	0
Chromobacterium	1	0	0	0	1	0	0	0	0	1
Chroococcidiopsis	1	0	0	0	1	0	0	0	0	0
Chryseobacterium	1	0	1	0	1	1	1	1	0	0
Chthoniobacter	1	0	0	0	1	0	0	0	0	0
Citrobacter	1	0	0	0	1	0	0	0	0	0
Citromicrobium	1	0	0	0	1	0	0	0	0	0
Clostridioides	1	0	1	0	1	0	0	0	0	0
Clostridium	1	0	1	0	1	0	0	1	0	0
Cocleimonas	1	0	0	0	1	0	0	0	0	0
Cohnella	1	0	1	0	1	0	0	1	0	0
Collimonas	1	0	0	0	1	0	0	0	0	0
Collinsella	1	0	1	0	1	0	0	0	0	0
Comamonas	1	0	1	0	1	0	0	0	0	0
Coprococcus	1	0	0	0	1	0	0	0	0	0
Corallococcus	1	0	0	0	1	0	0	0	0	0
Corynebacterium	1	1	1	0	1	1	0	1	0	0
Cronobacter	1	0	0	0	1	0	0	0	0	0
Cryobacterium	1	0	0	0	1	0	0	1	0	0
Cupriavidus	1	0	1	0	1	0	0	1	0	0
Curtobacterium	1	0	1	0	1	0	0	1	0	0
Curvibacter	1	0	1	0	1	0	0	0	0	0
Cutibacterium	1	0	1	0	1	0	1	1	0	0
Defluviitalea	1	0	0	0	0	0	0	0	0	0
Dehalobacter	1	0	0	0	1	0	0	0	0	0
Deinococcus	1	0	1	0	1	0	0	1	0	0
Delftia	1	1	1	0	1	0	0	1	0	0
Dermacoccus	1	0	0	0	1	0	0	1	0	0
Desulfobacterium	1	0	0	0	1	0	0	0	0	0
Desulfocarbo	1	0	0	0	1	0	0	0	0	0
Desulfonatronovibrio	1	0	0	0	1	0	0	0	0	0
Desulfonauticus	1	0	0	0	0	0	0	0	0	0
Desulfotalea	1	0	0	0	1	0	0	0	0	0
Desulfovibrio	1	0	1	0	1	0	0	1	0	0
Devosia	1	0	1	0	1	0	0	1	0	0
Dialister	1	0	1	0	1	0	0	0	0	0
Diaphorobacter	1	0	0	0	1	0	0	0	0	0
Dongia	1	0	0	0	1	0	0	0	0	0
Dysgonomonas	1	0	1	0	1	0	0	0	0	0
Edaphobacillus	1	0	0	0	1	0	0	0	0	0
Edaphobacter	1	0	1	0	1	0	0	0	0	0
Emticicia	1	0	1	0	1	0	0	0	0	0
Enterobacter	1	0	1	0	1	0	0	0	0	0
Enterocloster	1	0	0	0	1	0	0	0	0	0
Enterococcus	1	0	1	0	1	0	0	1	0	0
Epibacterium	1	0	0	0	1	0	0	0	0	0
Erwinia	1	0	0	0	1	0	0	0	0	0
Escherichia	1	0	1	0	1	1	0	0	0	0
Ethanoligenens	1	0	0	0	0	0	0	0	0	0
Eubacterium	1	0	1	0	1	1	0	0	0	0
Exiguobacterium	1	0	1	0	1	0	0	0	0	0
Ezakiella	1	0	0	0	0	0	0	0	0	0
Facklamia	1	0	1	0	1	0	0	0	0	0
Faecalibacterium	1	0	0	0	1	0	0	0	0	0
Ferrovum	1	0	0	0	1	0	0	0	0	0
Fibrella	1	0	0	0	1	0	0	0	0	0
Fictibacillus	1	0	0	0	1	0	0	0	0	0
Finegoldia	1	1	1	0	1	0	0	0	0	0
Flaviflexus	1	0	0	0	0	0	0	0	0	0
Flavivirga	1	0	0	0	1	0	0	0	0	0
Flavobacterium	1	0	1	1	1	1	0	1	0	0
Flavonifractor	1	0	0	0	1	0	0	0	0	0
Fluviicoccus	1	0	0	0	1	0	0	0	0	0
Fodinicurvata	1	0	0	0	1	0	0	0	0	0
Fonticella	1	0	0	0	1	0	0	0	0	0
Francisella	1	1	1	0	1	0	0	0	0	0
Frankia	1	0	1	0	1	1	0	1	0	0
Friedmanniella	1	0	0	0	1	0	0	0	0	0
Fusobacterium	1	0	0	0	1	0	0	0	0	0
Gardnerella	1	0	0	0	1	0	0	0	0	0
Geitlerinema	1	0	0	0	1	0	0	0	0	0
Gemella	1	0	1	1	1	1	0	0	0	0
Gemmata	1	0	0	0	1	0	0	0	0	0
Gemmatirosa	1	0	1	0	1	0	0	0	0	0
Gemmiger	1	0	0	0	1	0	0	0	0	0
Geobacillus	1	1	0	0	1	0	0	0	0	0
Geodermatophilus	1	0	1	0	1	0	0	0	0	0
Geovibrio	1	0	0	0	0	0	0	0	0	0
Glaciihabitans	1	0	0	0	0	0	0	1	0	0
Glutamicibacter	1	0	0	0	1	0	0	0	0	0
Glycomyces	1	0	0	0	1	0	0	1	0	0
Gordonia	1	0	1	0	1	0	0	1	0	0
Granulicatella	1	0	1	0	1	0	1	0	0	0
Granulicoccus	1	0	0	0	0	0	0	0	0	0
Gryllotalpicola	1	0	0	0	1	0	0	1	0	0
Gulosibacter	1	0	0	0	0	0	0	1	0	0
Gynuella	1	0	0	0	1	0	0	0	0	0
Haematobacter	1	0	0	0	0	0	0	0	0	0
Haloactinospora	1	0	0	0	0	0	0	0	0	0
Halomonas	1	0	1	0	1	0	0	0	0	0
Hathewaya	1	0	0	0	1	0	0	0	0	0
Helcococcus	1	0	0	0	0	0	0	0	0	0
Helicobacter	1	0	0	0	1	0	0	1	0	0
Heliobacterium	1	0	0	0	0	0	0	0	0	0
Herbaspirillum	1	0	1	0	1	0	0	1	0	0
Homoserinimonas	1	0	0	0	0	0	0	1	0	0
Hungatella	1	0	0	1	1	1	0	0	0	0
Hydrogenimonas	1	0	0	0	0	0	0	0	0	0
Hydrogenophaga	1	0	1	0	1	0	0	0	0	0
Hymenobacter	1	1	1	0	1	0	0	1	0	0
Hyphomicrobium	1	0	1	0	1	0	0	0	0	0
Hyphomonas	1	0	1	0	1	0	0	0	0	0
Ideonella	1	0	1	0	1	0	0	0	0	0
Inquilinus	1	0	0	0	1	0	0	0	0	0
Isoptericola	1	0	0	0	1	0	0	1	0	0
Janibacter	1	0	0	0	1	0	0	0	0	0
Jatrophihabitans	1	0	0	0	1	0	0	0	0	0
Jiangella	1	0	0	0	1	0	0	1	0	0
Jonquetella	1	0	0	0	0	0	0	0	0	0
Kitasatospora	1	0	0	0	1	0	0	0	0	0
Klebsiella	1	0	1	0	1	1	0	0	0	0
Knoellia	1	0	0	0	1	0	0	0	0	0
Kocuria	1	0	1	0	1	0	0	1	0	0
Komagataeibacter	1	0	0	0	1	0	0	0	0	0
Kribbella	1	0	1	0	1	0	0	1	0	0
Labrenzia	1	0	1	0	1	0	0	0	0	0
Lachnoclostridium	1	0	1	0	1	0	0	0	0	0
Lachnospira	1	0	0	0	1	0	0	0	0	0
Lactobacillus	1	0	1	0	1	0	0	1	0	0
Lactococcus	1	0	1	0	1	0	0	0	0	0
Lawsonella	1	1	1	0	1	1	0	1	0	0
Legionella	1	0	1	0	1	0	0	0	0	0
Leifsonia	1	0	1	0	1	0	0	1	0	0
Lentibacillus	1	0	0	0	1	0	0	0	0	0
Leptolyngbya	1	0	0	0	1	0	0	0	0	0
Leptospira	1	0	1	0	1	0	0	0	0	0
Leuconostoc	1	0	0	0	1	0	0	0	0	0
Lewinella	1	0	1	0	1	0	0	0	0	0
Lichenibacterium	1	0	1	0	1	0	0	0	0	0
Limnobacter	1	0	0	0	1	0	0	0	0	0
Limnohabitans	1	0	1	0	1	0	0	0	0	0
Limnothrix	1	0	0	0	0	0	0	0	0	0
Litorilinea	1	0	0	0	1	0	0	0	0	0
Luteibacter	1	0	1	0	1	0	0	0	0	0
Luteipulveratus	1	0	0	0	1	0	0	0	0	0
Lutibacter	1	0	1	0	1	0	0	0	0	0
Lysinibacillus	1	0	1	0	1	0	0	1	0	0
Lysobacter	1	0	1	0	1	0	0	0	0	0
Malikia	1	0	0	0	1	0	0	0	0	0
Marinibacterium	1	0	0	0	1	0	0	0	0	0
Marinobacter	1	0	0	0	1	1	0	1	0	0
Marinococcus	1	0	0	0	1	0	0	0	0	0
Marinomonas	1	0	1	0	1	0	0	0	0	0
Marivita	1	0	0	0	1	0	0	0	0	0
Martelella	1	1	0	0	1	0	0	0	0	0
Marvinbryantia	1	0	0	0	0	0	0	0	0	0
Massilia	1	1	1	0	1	0	0	0	0	0
Megasphaera	1	0	0	1	1	1	0	0	0	0
Mesorhizobium	1	0	1	0	1	1	0	1	0	1
Methylobacterium	1	0	1	0	1	1	0	1	0	0
Methylocapsa	1	0	0	0	1	0	0	0	0	0
Methyloferula	1	0	0	0	0	0	0	0	0	0
Methylophilus	1	0	0	0	1	1	0	0	0	0
Methylorubrum	1	0	1	0	1	0	0	0	0	0
Methyloversatilis	1	0	1	0	1	0	0	0	0	0
Microbacterium	1	1	1	0	1	1	0	1	0	0
Microbulbifer	1	0	0	0	1	0	0	0	0	0
Micrococcus	1	0	0	0	1	0	0	1	0	0
Micromonospora	1	0	1	0	1	0	0	1	0	0
Minicystis	1	0	0	0	1	0	0	0	0	0
Miniimonas	1	0	0	0	0	0	0	0	0	0
Mobiluncus	1	0	0	0	1	0	0	0	0	0
Mogibacterium	1	0	0	0	0	0	0	0	0	0
Moheibacter	1	0	0	0	0	0	0	0	0	0
Moraxella	1	0	1	0	1	0	0	0	0	0
Mucilaginibacter	1	0	1	0	1	0	0	0	0	0
Muricauda	1	0	0	0	1	0	0	0	0	0
Mycetocola	1	0	0	0	1	0	0	1	0	0
Mycobacterium	1	0	1	1	1	1	0	1	0	0
Mycobacteroides	1	0	1	1	1	0	1	1	0	0
Mycolicibacterium	1	0	1	0	1	1	0	1	0	0
Myxococcus	1	0	1	0	1	0	0	0	0	0
Myxosarcina	1	0	0	0	1	0	0	0	0	0
Neisseria	1	0	1	0	1	0	0	0	0	0
Neomicrococcus	1	0	1	0	0	0	0	1	0	0
Nesterenkonia	1	0	0	0	1	0	0	1	0	0
Nissabacter	1	0	0	0	0	0	0	0	0	0
Nitratireductor	1	0	0	0	1	0	0	0	0	0
Nitrolancea	1	0	0	0	1	0	0	0	0	0
Nitrosococcus	1	0	0	0	1	0	0	0	0	0
Nitrosospira	1	0	0	0	1	0	0	0	0	0
Nocardia	1	0	1	0	1	0	0	1	0	0
Nocardioides	1	1	1	0	1	1	0	1	0	0
Nocardiopsis	1	0	0	0	1	0	0	0	0	0
Nodularia	1	0	1	0	1	0	0	1	0	0
Nonomuraea	1	0	1	1	1	1	0	0	0	0
Nostoc	1	0	0	0	1	0	0	0	0	0
Noviherbaspirillum	1	0	1	0	1	0	0	0	0	0
Novosphingobium	1	0	1	0	1	0	0	1	0	0
Olsenella	1	0	0	0	1	0	0	1	0	0
Oribacterium	1	0	1	0	1	0	0	0	0	0
Ornithobacterium	1	0	0	0	1	0	0	0	0	0
Oscillibacter	1	0	0	0	1	0	0	0	0	0
Paenibacillus	1	0	1	0	1	1	0	1	0	1
Pantoea	1	0	1	0	1	1	0	0	0	0
Parabacteroides	1	0	1	0	1	1	0	0	0	0
Paraburkholderia	1	0	1	0	1	0	0	0	0	0
Paracoccus	1	0	1	0	1	0	0	1	0	0
Pararhodospirillum	1	0	1	0	1	0	0	0	0	0
Parvimonas	1	0	0	0	1	0	0	0	0	0
Parvularcula	1	0	0	0	1	0	0	0	0	0
Pasteurella	1	0	0	0	1	0	0	0	0	0
Paucibacter	1	0	1	0	1	0	0	0	0	0
Pediococcus	1	0	0	0	1	0	0	0	0	0
Pedobacter	1	0	1	0	1	0	0	1	0	0
Pelomonas	1	0	1	0	1	0	0	0	0	0
Pelotomaculum	1	0	1	0	1	0	0	0	0	0
Peptococcus	1	0	1	0	0	0	0	0	0	0
Peptoniphilus	1	0	1	0	1	1	0	0	0	0
Peptostreptococcus	1	0	0	0	0	0	0	0	0	0
Petrotoga	1	0	0	0	1	0	0	0	0	0
Phascolarctobacterium	1	0	0	0	1	0	0	0	0	0
Phenylobacterium	1	1	1	0	1	0	0	1	0	0
Phocaeicola	1	0	0	0	0	0	0	0	0	0
Photobacterium	1	0	1	0	1	0	0	0	0	0
Plesiocystis	1	0	0	0	1	0	0	0	0	0
Polynucleobacter	1	0	0	0	1	1	0	0	0	0
Pontibacter	1	0	1	0	1	0	0	1	0	0
Porphyromonas	1	0	1	0	1	1	0	0	0	0
Prevotella	1	1	1	1	1	1	0	1	0	0
Promicromonospora	1	0	0	0	1	0	0	1	0	0
Propionibacterium	1	0	1	0	1	0	0	0	0	0
Propionimicrobium	1	0	0	0	1	0	0	0	0	0
Propionispora	1	0	1	0	0	0	0	0	0	0
Proteiniclasticum	1	0	0	0	1	0	0	0	0	0
Pseudarthrobacter	1	0	1	0	1	0	0	1	0	0
Pseudoalteromonas	1	1	1	0	1	1	0	0	0	0
Pseudobutyrivibrio	1	0	0	0	1	0	0	0	0	0
Pseudoclavibacter	1	0	1	0	1	0	0	1	0	0
Pseudoglutamicibacter	1	0	0	0	0	0	0	1	0	0
Pseudolysobacter	1	0	0	0	0	0	0	0	0	0
Pseudomonas	1	0	1	0	1	0	1	1	0	1
Pseudonocardia	1	0	1	0	1	0	0	1	0	0
Pseudoxanthomonas	1	0	0	0	1	0	0	0	0	0
Pseudozobellia	1	0	0	0	1	0	0	0	0	0
Psychrobacter	1	0	1	0	1	0	0	0	0	0
Psychroflexus	1	0	0	0	1	0	0	0	0	0
Psychromonas	1	0	0	0	1	0	0	0	0	0
Pusillimonas	1	0	0	0	1	0	0	1	0	0
Ralstonia	1	0	1	0	1	0	0	1	0	0
Rathayibacter	1	0	0	0	1	0	0	1	0	0
Reyranella	1	0	0	0	1	0	0	0	0	0
Rhizobium	1	0	1	0	1	0	0	1	0	1
Rhodanobacter	1	0	1	0	1	0	0	0	0	0
Rhodobacter	1	0	0	0	1	0	0	0	0	0
Rhodococcus	1	0	1	0	1	1	0	1	0	0
Rhodoferax	1	0	1	0	1	0	0	0	0	0
Rhodohalobacter	1	0	0	0	1	0	0	0	0	0
Rhodoluna	1	0	0	0	1	0	0	1	0	0
Rhodopirellula	1	0	1	0	1	0	0	0	0	0
Riemerella	1	0	1	0	1	0	0	0	0	0
Robinsoniella	1	0	0	0	1	0	0	1	0	0
Roseateles	1	0	1	0	1	0	0	0	0	0
Roseburia	1	0	1	0	1	1	0	0	0	0
Roseomonas	1	0	0	0	1	0	0	0	0	0
Rothia	1	0	1	0	1	0	1	1	0	0
Ruania	1	0	0	0	1	0	0	0	0	0
Rubricoccus	1	0	0	0	1	0	0	0	0	0
Rubrivirga	1	0	1	0	1	0	0	0	0	0
Rubrivivax	1	0	1	0	1	0	0	0	0	0
Ruegeria	1	0	1	0	1	0	0	0	0	0
Rufibacter	1	0	0	0	1	0	0	0	0	0
Ruminococcus	1	0	1	0	1	1	0	1	0	0
Runella	1	0	0	0	1	0	0	0	0	0
Saccharopolyspora	1	0	0	0	1	0	0	1	0	0
Salimicrobium	1	0	0	0	1	0	0	0	0	0
Salinarimonas	1	0	0	0	1	0	0	0	0	0
Salinibacter	1	0	0	0	1	0	0	0	0	0
Salinicoccus	1	0	1	0	1	0	0	0	0	0
Salinivibrio	1	0	0	0	1	0	0	0	0	0
Sanguibacteroides	1	0	0	0	0	0	0	0	0	0
Sarcina	1	0	0	0	0	0	0	0	0	0
Seinonella	1	0	0	0	0	0	0	0	0	0
Selenomonas	1	0	1	0	1	0	0	0	0	0
Seonamhaeicola	1	0	0	0	1	0	0	0	0	0
Serinicoccus	1	0	0	0	1	0	0	0	0	0
Serratia	1	1	1	0	1	0	1	1	0	0
Shewanella	1	0	1	0	1	0	0	1	0	0
Siccationidurans	1	0	0	0	0	0	0	0	0	0
Sinirhodobacter	1	0	0	0	1	0	0	0	0	0
Sinorhizobium	1	0	1	0	1	1	0	0	0	0
Skermanella	1	0	0	0	1	0	0	0	0	0
Slackia	1	0	1	0	1	0	0	0	0	0
Solirubrobacter	1	0	1	0	1	0	0	0	0	0
Sphaerisporangium	1	0	0	0	1	0	0	0	0	0
Sphaerobacter	1	0	1	0	1	0	0	0	0	0
Sphaerochaeta	1	0	0	0	1	0	0	1	0	0
Sphingobacterium	1	0	1	0	1	0	0	0	0	0
Sphingobium	1	0	1	0	1	0	0	1	0	0
Sphingomonas	1	0	1	0	1	1	0	1	0	0
Sphingopyxis	1	0	1	0	1	0	0	1	0	0
Sphingosinicella	1	0	1	0	1	0	0	0	0	0
Spirosoma	1	0	1	0	1	0	0	0	0	0
Sporanaerobacter	1	0	0	0	0	0	0	0	0	0
Sporolactobacillus	1	0	1	0	1	0	0	1	0	0
Sporosarcina	1	0	0	0	1	0	0	0	0	0
Stackebrandtia	1	0	0	0	1	0	0	0	0	0
Staphylococcus	1	0	1	0	1	0	0	1	0	1
Starkeya	1	0	0	0	1	0	0	0	0	0
Stenotrophomonas	1	0	1	0	1	0	0	1	0	0
Streptacidiphilus	1	0	0	0	1	0	0	1	0	0
Streptococcus	1	1	1	1	1	1	0	1	0	0
Streptomyces	1	0	1	0	1	0	0	1	0	1
Succiniclasticum	1	0	0	0	0	0	0	1	0	0
Succinimonas	1	0	0	0	1	0	0	0	0	0
Sulfitobacter	1	0	0	0	1	0	0	0	0	0
Sulfuriferula	1	0	0	0	1	0	0	0	0	0
Sulfurisoma	1	0	0	0	0	0	0	0	0	0
Syntrophorhabdus	1	0	0	0	1	0	0	0	0	0
Tepidicaulis	1	0	0	0	0	0	0	0	0	0
Tepidimonas	1	0	1	0	1	0	0	0	0	0
Tessaracoccus	1	0	1	0	1	0	0	1	0	0
Tetrasphaera	1	0	1	0	1	0	0	0	0	0
Thermicanus	1	0	0	0	0	0	0	0	0	0
Thermodesulfovibrio	1	0	1	0	1	0	0	0	0	0
Thermosynechococcus	1	0	0	0	1	0	0	0	0	0
Thermotoga	1	0	0	0	1	0	0	0	0	0
Thermus	1	0	0	0	1	0	0	0	0	0
Thioclava	1	0	1	0	1	0	0	0	0	0
Thiolapillus	1	0	0	0	0	0	0	0	0	0
Tsukamurella	1	0	0	0	1	0	0	0	0	0
Uliginosibacterium	1	0	0	0	1	0	0	0	0	0
Ulvibacter	1	0	1	0	1	0	0	0	0	0
Varibaculum	1	0	1	0	1	0	0	0	0	0
Variovorax	1	0	1	0	1	0	0	1	0	0
Veillonella	1	0	1	1	1	1	0	0	0	0
Vibrio	1	0	1	0	1	1	0	1	0	0
Virgibacillus	1	0	1	0	1	0	0	1	0	0
Vitreoscilla	1	0	0	0	1	0	0	0	0	0
Vulcaniibacterium	1	0	0	0	0	0	0	0	0	0
Williamsia	1	0	0	0	1	0	0	0	0	0
Winkia	1	0	0	0	0	0	0	0	0	0
Winogradskyella	1	0	0	0	1	0	0	0	0	0
Wolinella	1	0	0	0	1	0	0	0	0	0
Xanthomonas	1	0	1	0	1	1	0	1	0	0
Xenophilus	1	0	0	0	1	0	0	1	0	0
Xylanimonas	1	0	0	0	1	0	0	0	0	0
Zavarzinella	1	0	0	0	1	0	0	0	0	0
Zymomonas	1	0	0	0	0	0	0	0	0	0
Baekduia	0	1	1	0	1	0	0	0	0	0
Confluentimicrobium	0	1	0	0	0	0	0	0	0	0
Empedobacter	0	1	1	0	1	0	0	0	0	0
Kingella	0	1	0	0	1	0	0	0	0	0
Leucothrix	0	1	1	0	1	0	0	0	0	0
Mameliella	0	1	0	0	0	0	0	0	0	0
Meiothermus	0	1	1	0	1	0	0	1	0	0
Ochrobactrum	0	1	0	0	1	1	0	0	0	0
Pannonibacter	0	1	0	0	1	0	0	0	0	0
Pseudorhodoferax	0	1	1	0	1	0	0	0	0	0
'Geomonas' Khan et al. 2020	0	0	1	0	0	0	0	0	0	0
Acidaminococcus	0	0	1	0	1	0	0	0	0	0
Acidipila	0	0	1	0	1	0	0	0	0	0
Actinomycetospora	0	0	1	0	1	0	0	0	0	0
Actinophytocola	0	0	1	0	1	0	0	0	0	0
Actinopolyspora	0	0	1	0	1	0	0	0	0	0
Adhaeribacter	0	0	1	0	1	0	0	0	0	0
Afipia	0	0	1	0	1	0	0	0	0	0
Agarilytica	0	0	1	0	1	0	0	0	0	0
Agrococcus	0	0	1	0	0	0	0	1	0	0
Agromyces	0	0	1	0	1	0	0	1	0	0
Albimonas	0	0	1	0	1	0	0	0	0	0
Aliagarivorans	0	0	1	0	0	0	0	0	0	0
Alicycliphilus	0	0	1	0	1	0	0	0	0	0
Alienimonas	0	0	1	0	1	0	0	0	0	0
Alistipes	0	0	1	0	1	0	0	0	0	0
Alkalimonas	0	0	1	0	0	0	0	0	0	0
Alteromonas	0	0	1	0	1	0	0	0	0	0
Ammoniphilus	0	0	1	0	1	0	0	0	0	0
Anaeromassilibacillus	0	0	1	0	1	0	0	0	0	0
Anaeromicrobium	0	0	1	0	1	0	0	0	0	0
Aquabacterium	0	0	1	0	1	0	0	0	0	0
Arachidicoccus	0	0	1	0	1	0	0	0	0	0
Arcticibacterium	0	0	1	0	1	0	0	0	0	0
Arsukibacterium	0	0	1	0	1	0	0	0	0	0
Arthrospira	0	0	1	0	1	0	0	0	0	0
Asinibacterium	0	0	1	0	1	1	0	0	0	0
Asticcacaulis	0	0	1	0	1	0	0	0	0	0
Atopostipes	0	0	1	0	0	0	0	0	0	0
Azoarcus	0	0	1	0	1	0	0	0	0	0
Azohydromonas	0	0	1	0	1	0	0	0	0	0
Azospira	0	0	1	0	1	0	0	0	0	0
Bacteriovorax	0	0	1	0	1	0	0	0	0	0
Barrientosiimonas	0	0	1	0	0	0	0	0	0	0
Beggiatoa	0	0	1	0	1	0	0	0	0	0
Belnapia	0	0	1	0	0	0	0	0	0	0
Blastopirellula	0	0	1	0	1	0	0	0	0	0
Bowmanella	0	0	1	0	0	0	0	0	0	0
Brachyspira	0	0	1	0	1	0	0	0	0	0
Bradymonas	0	0	1	0	1	0	0	0	0	0
Brevilactibacter	0	0	1	0	0	0	0	0	0	0
Brochothrix	0	0	1	0	1	0	0	1	0	0
Butyricicoccus	0	0	1	0	1	0	0	0	0	0
Caldalkalibacillus	0	0	1	0	0	0	0	0	0	0
Caldicellulosiruptor	0	0	1	0	1	0	0	0	0	0
Caldimonas	0	0	1	0	0	0	0	0	0	0
Caldithrix	0	0	1	0	1	0	0	0	0	0
Camelimonas	0	0	1	0	0	0	0	0	0	0
Candidatus Dichloromethanomonas	0	0	1	0	1	0	0	0	0	0
Candidatus Macondimonas	0	0	1	0	1	0	0	0	0	0
Candidatus Methylomirabilis	0	0	1	0	1	0	0	0	0	0
Candidatus Microthrix	0	0	1	0	0	0	0	0	0	0
Candidatus Saccharimonas	0	0	1	0	1	0	0	0	0	0
Candidatus Sumerlaea	0	0	1	0	0	0	0	0	0	0
Capnocytophaga	0	0	1	0	1	0	0	0	0	0
Carnobacterium	0	0	1	0	1	0	0	1	0	0
Catellatospora	0	0	1	0	1	0	0	0	0	0
Catenovulum	0	0	1	0	1	0	0	0	0	0
Celeribacter	0	0	1	0	1	0	0	0	0	0
Cellvibrio	0	0	1	0	1	0	0	0	0	0
Chachezhania	0	0	1	0	0	0	0	0	0	0
Changchengzhania	0	0	1	0	0	0	0	0	0	0
Chitinibacter	0	0	1	0	1	0	0	0	0	0
Chlorobaculum	0	0	1	0	1	0	0	0	0	0
Chondromyces	0	0	1	0	1	0	0	0	0	0
Chroogloeocystis	0	0	1	0	0	0	0	0	0	0
Citreimonas	0	0	1	0	0	0	0	0	0	0
Citricoccus	0	0	1	0	0	0	0	1	0	0
Coleofasciculus	0	0	1	0	0	0	0	0	0	0
Colwellia	0	0	1	0	1	0	0	0	0	0
Coprobacillus	0	0	1	0	1	0	0	0	0	0
Coraliomargarita	0	0	1	0	1	0	0	0	0	0
Corticibacter	0	0	1	0	1	0	0	0	0	0
Couchioplanes	0	0	1	0	0	0	0	0	0	0
Croceicoccus	0	0	1	0	1	0	0	0	0	0
Crocinitomix	0	0	1	0	1	0	0	0	0	0
Cyanobium	0	0	1	0	1	0	0	0	0	0
Cyclobacterium	0	0	1	0	1	0	0	0	0	0
Cytophaga	0	0	1	0	1	0	0	0	0	0
Dechloromonas	0	0	1	0	1	0	0	0	0	0
Demequina	0	0	1	0	1	0	0	1	0	0
Desulfallas	0	0	1	0	1	0	0	0	0	0
Desulfobacter	0	0	1	0	1	0	0	0	0	0
Desulfosporosinus	0	0	1	0	1	0	0	1	0	0
Dietzia	0	0	1	0	1	0	0	1	0	0
Dinghuibacter	0	0	1	0	1	0	0	0	0	0
Dokdonella	0	0	1	0	1	0	0	0	0	0
Duganella	0	0	1	0	1	0	0	0	0	0
Dyadobacter	0	0	1	0	1	0	0	0	0	0
Dyella	0	0	1	0	1	0	0	0	0	0
Eggerthella	0	0	1	0	0	0	0	0	0	0
Enorma	0	0	1	0	1	0	0	0	0	0
Fastidiosibacter	0	0	1	0	1	0	0	0	0	0
Fibrobacter	0	0	1	0	1	1	0	0	0	0
Filimonas	0	0	1	0	1	0	0	0	0	0
Fischerella	0	0	1	0	1	0	0	0	0	0
Flaviaesturariibacter	0	0	1	0	1	0	0	0	0	0
Flavihumibacter	0	0	1	0	1	0	0	0	0	0
Flectobacillus	0	0	1	0	1	0	0	0	0	0
Frederiksenia	0	0	1	0	0	0	0	0	0	0
Frigoribacterium	0	0	1	0	0	0	0	1	0	0
Fuerstia	0	0	1	0	1	0	0	0	0	0
Gallibacterium	0	0	1	0	1	0	0	0	0	0
Gemmatimonas	0	0	1	0	1	0	0	0	0	0
Gemmobacter	0	0	1	0	1	0	0	0	0	0
Gillisia	0	0	1	0	1	0	0	0	0	0
Glaciibacter	0	0	1	0	1	0	0	1	0	0
Gracilibacillus	0	0	1	0	1	0	0	0	0	0
Granulibacter	0	0	1	0	1	0	0	0	0	0
Granulicella	0	0	1	0	1	0	0	0	0	0
Haemophilus	0	0	1	0	1	0	0	0	0	0
Hafnia	0	0	1	0	1	0	0	0	0	0
Hephaestia	0	0	1	0	1	0	0	0	0	0
Herbiconiux	0	0	1	0	1	0	0	1	0	0
Herpetosiphon	0	0	1	0	1	0	0	0	0	0
Hydrogenophilus	0	0	1	0	0	0	0	1	0	0
Iodobacter	0	0	1	0	1	0	0	0	0	0
Jannaschia	0	0	1	0	1	0	0	0	0	1
Janthinobacterium	0	0	1	0	1	0	0	0	0	0
Jeotgalibaca	0	0	1	0	0	0	0	0	0	0
Jeotgalibacillus	0	0	1	0	1	0	0	0	0	0
Kiloniella	0	0	1	0	1	0	0	0	0	0
Kineosporia	0	0	1	0	1	0	0	1	0	0
Kinneretia	0	0	1	0	0	0	0	0	0	0
Klenkia	0	0	1	0	1	0	0	0	0	0
Kluyvera	0	0	1	0	1	0	0	0	0	0
Kouleothrix	0	0	1	0	1	0	0	0	0	0
Ktedonobacter	0	0	1	0	1	0	0	0	0	0
Ktedonosporobacter	0	0	1	0	1	0	0	0	0	0
Kurthia	0	0	1	0	1	0	0	0	0	0
Lachnotalea	0	0	1	0	1	0	0	0	0	0
Lacibacter	0	0	1	0	1	0	0	0	0	0
Lacimicrobium	0	0	1	0	0	0	0	0	0	0
Lacinutrix	0	0	1	0	1	0	0	0	0	0
Lacisediminihabitans	0	0	1	0	0	0	0	0	0	0
Lautropia	0	0	1	0	1	0	0	0	0	0
Lechevalieria	0	0	1	0	1	0	0	0	0	0
Leclercia	0	0	1	0	1	0	0	0	0	0
Lentzea	0	0	1	0	1	0	0	0	0	0
Leptothrix	0	0	1	0	1	0	0	0	0	0
Leptotrichia	0	0	1	0	1	0	0	0	0	0
Leucobacter	0	0	1	0	1	0	0	1	0	0
Loktanella	0	0	1	0	1	0	0	0	0	0
Luteimonas	0	0	1	0	1	0	0	0	0	0
Macellibacteroides	0	0	1	0	1	0	0	0	0	0
Macromonas	0	0	1	0	1	0	0	0	0	0
Magnetospirillum	0	0	1	0	1	0	0	0	0	0
Mangrovimonas	0	0	1	0	1	0	0	0	0	0
Maricaulis	0	0	1	0	1	0	0	0	0	0
Marimonas	0	0	1	0	1	0	0	0	0	0
Mariniblastus	0	0	1	0	1	0	0	0	0	0
Marinicauda	0	0	1	0	1	0	0	0	0	0
Marinobacterium	0	0	1	0	1	0	0	0	0	0
Marmoricola	0	0	1	0	1	0	0	1	0	0
Mediterraneibacter	0	0	1	0	1	0	0	0	0	0
Melioribacter	0	0	1	0	0	0	0	0	0	0
Methylibium	0	0	1	0	1	0	0	0	0	0
Methylomonas	0	0	1	0	1	0	0	0	0	0
Methylophaga	0	0	1	0	1	0	0	0	0	0
Methylotenera	0	0	1	0	1	0	0	0	0	1
Methyloterricola	0	0	1	0	0	0	0	0	0	0
Micavibrio	0	0	1	0	1	0	0	0	0	0
Microcystis	0	0	1	0	1	0	0	0	0	0
Micropruina	0	0	1	0	1	0	0	0	0	0
Microvirga	0	0	1	0	1	0	0	0	0	0
Mitsuaria	0	0	1	0	1	0	0	0	0	0
Modestobacter	0	0	1	0	1	0	0	0	0	0
Moorella	0	0	1	0	1	0	0	0	0	0
Murimonas	0	0	1	0	1	0	0	0	0	0
Mycoplasma	0	0	1	0	1	0	0	0	0	0
Nafulsella	0	0	1	0	0	0	0	0	0	0
Naumannella	0	0	1	0	1	0	1	0	0	0
Neptuniibacter	0	0	1	0	1	0	0	0	0	0
Nevskia	0	0	1	0	1	0	0	0	0	0
Nitrospira	0	0	1	0	1	0	0	0	0	0
Niveispirillum	0	0	1	0	1	0	0	0	0	0
Ohtaekwangia	0	0	1	0	1	0	0	0	0	0
Panacagrimonas	0	0	1	0	1	0	0	0	0	0
Panacibacter	0	0	1	0	1	0	0	0	0	0
Parachlamydia	0	0	1	0	1	0	0	0	0	0
Paraferrimonas	0	0	1	0	1	0	0	0	0	0
Parafilimonas	0	0	1	0	1	0	0	0	0	0
Paraliobacillus	0	0	1	0	1	0	0	0	0	0
Pararheinheimera	0	0	1	0	1	0	0	0	0	0
Pelagivirga	0	0	1	0	0	0	0	0	0	0
Pelosinus	0	0	1	0	1	0	0	0	0	0
Phaeodactylibacter	0	0	1	0	1	0	0	0	0	0
Phreatobacter	0	0	1	0	1	0	0	0	0	0
Phyllobacterium	0	0	1	0	1	0	0	0	0	0
Pigmentiphaga	0	0	1	0	1	0	0	0	0	0
Pirellula	0	0	1	0	1	0	0	0	0	0
Polaribacter	0	0	1	0	1	0	0	0	0	0
Polaromonas	0	0	1	0	1	0	0	0	0	0
Porphyrobacter	0	0	1	0	1	0	0	0	0	0
Prosthecobacter	0	0	1	0	1	0	0	0	0	0
Prosthecochloris	0	0	1	0	0	0	0	0	0	0
Pseudacidovorax	0	0	1	0	1	0	0	1	0	0
Pseudaminobacter	0	0	1	0	1	0	0	0	0	0
Pseudoflavitalea	0	0	1	0	0	0	0	0	1	0
Pseudopedobacter	0	0	1	0	1	0	0	0	0	0
Pseudorhodoplanes	0	0	1	0	0	0	0	0	0	0
Pseudoruminoccoccus	0	0	1	0	1	0	0	0	0	0
Pustulibacterium	0	0	1	0	1	0	0	0	0	0
Rahnella	0	0	1	0	1	0	0	0	0	0
Ramlibacter	0	0	1	0	1	0	0	0	0	0
Rheinheimera	0	0	1	0	1	0	0	0	0	0
Rhizobacter	0	0	1	0	1	0	0	0	0	0
Rhodopseudomonas	0	0	1	0	1	0	0	1	0	0
Rodentibacter	0	0	1	0	1	0	0	0	0	0
Roseospirillum	0	0	1	0	1	0	0	0	0	0
Rubellimicrobium	0	0	1	0	1	0	0	0	0	0
Saccharothrix	0	0	1	0	1	0	1	0	0	0
Salinibacterium	0	0	1	0	1	0	0	1	0	0
Salinicola	0	0	1	0	1	1	0	0	0	0
Salinispora	0	0	1	0	1	0	0	0	0	0
Salipaludibacillus	0	0	1	0	0	0	0	0	0	0
Salipiger	0	0	1	0	1	0	0	0	0	0
Salmonella	0	0	1	0	1	0	1	0	0	0
Sandarakinorhabdus	0	0	1	0	1	0	0	0	0	0
Sanguibacter	0	0	1	0	1	0	0	1	0	0
Schaalia	0	0	1	0	1	0	0	1	0	0
Schlesneria	0	0	1	0	1	0	0	0	0	0
Scytonema	0	0	1	0	1	1	0	0	0	0
Sediminibacterium	0	0	1	0	1	0	0	0	0	0
Segetibacter	0	0	1	0	1	0	0	0	0	0
Serpentinomonas	0	0	1	0	1	0	0	0	0	0
Shinella	0	0	1	0	1	0	0	1	0	0
Simonsiella	0	0	1	0	0	0	0	0	0	0
Singulisphaera	0	0	1	0	1	0	0	1	0	0
Soehngenia	0	0	1	0	1	0	0	0	0	0
Solimicrobium	0	0	1	0	1	0	0	0	0	0
Solobacterium	0	0	1	0	0	0	0	0	0	0
Sphingorhabdus	0	0	1	0	1	0	0	0	0	0
Sporolituus	0	0	1	0	0	0	0	0	0	0
Sporomusa	0	0	1	0	1	0	0	0	0	0
Steroidobacter	0	0	1	0	1	0	0	0	0	0
Stigmatella	0	0	1	0	1	0	0	0	0	0
Stomatobaculum	0	0	1	0	0	0	0	0	0	0
Subtercola	0	0	1	0	1	0	0	1	0	0
Sulfuricaulis	0	0	1	0	0	0	0	0	0	0
Sulfurospirillum	0	0	1	0	1	0	0	0	0	0
Synechococcus	0	0	1	0	1	0	0	0	0	0
Tabrizicola	0	0	1	0	1	0	0	1	0	0
Tamlana	0	0	1	0	1	0	0	0	0	0
Tardiphaga	0	0	1	0	1	0	0	0	0	0
Tateyamaria	0	0	1	0	0	0	0	0	0	0
Tepidiphilus	0	0	1	0	1	0	0	0	0	0
Terrisporobacter	0	0	1	0	1	0	0	0	0	0
Thalassotalea	0	0	1	0	1	0	0	0	0	0
Thermoactinospora	0	0	1	0	0	0	0	0	0	0
Thermogutta	0	0	1	0	0	0	0	0	0	0
Thermomicrobium	0	0	1	0	0	0	0	0	0	0
Thiocapsa	0	0	1	0	1	0	0	1	0	0
Thiopseudomonas	0	0	1	0	0	0	0	0	0	0
Thiothrix	0	0	1	0	1	0	0	0	0	0
Tindallia	0	0	1	0	1	0	0	0	0	0
Tolumonas	0	0	1	0	1	0	0	1	0	0
Vibrionimonas	0	0	1	0	0	0	0	0	0	0
Weissella	0	0	1	0	1	0	0	0	0	0
Xanthobacter	0	0	1	0	1	0	0	0	0	0
Xylophilus	0	0	1	0	1	0	0	0	0	0
Zobellella	0	0	1	0	1	0	0	0	0	0
Zoogloea	0	0	1	0	1	0	0	1	0	0
Endozoicomonas	0	0	0	1	1	0	0	1	0	0
Abditibacterium	0	0	0	0	1	0	0	0	0	0
Acaryochloris	0	0	0	0	1	0	0	0	0	0
Acetivibrio	0	0	0	0	1	0	0	0	0	0
Acetobacterium	0	0	0	0	1	0	0	0	0	0
Acetobacteroides	0	0	0	0	1	0	0	0	0	0
Acetonema	0	0	0	0	1	0	0	0	0	0
Achromatium	0	0	0	0	1	0	0	0	0	0
Acidaminobacter	0	0	0	0	1	0	0	0	0	0
Acidibrevibacterium	0	0	0	0	1	0	0	0	0	0
Acidiferrobacter	0	0	0	0	1	0	0	0	0	0
Acidihalobacter	0	0	0	0	1	0	0	0	0	0
Acidimicrobium	0	0	0	0	1	0	0	0	0	0
Acidiphilium	0	0	0	0	1	0	0	0	0	0
Acidipropionibacterium	0	0	0	0	1	0	0	1	0	0
Acidisarcina	0	0	0	0	1	0	0	0	0	0
Acidobacterium	0	0	0	0	1	0	0	0	0	0
Acidocella	0	0	0	0	1	0	0	0	0	0
Acidomonas	0	0	0	0	1	0	0	0	0	0
Actinoallomurus	0	0	0	0	1	0	0	0	0	0
Actinobacillus	0	0	0	0	1	0	0	0	0	0
Actinocrispum	0	0	0	0	1	0	0	0	0	0
Actinokineospora	0	0	0	0	1	0	0	0	0	0
Actinopolymorpha	0	0	0	0	1	0	0	0	0	0
Actinosynnema	0	0	0	0	1	0	0	1	0	0
Actinotalea	0	0	0	0	1	0	0	1	0	0
Actinotignum	0	0	0	0	1	0	0	1	0	0
Acutalibacter	0	0	0	0	1	0	0	0	0	0
Aeribacillus	0	0	0	0	1	0	0	0	0	0
Aestuariibacter	0	0	0	0	1	0	0	0	0	0
Aestuariimicrobium	0	0	0	0	1	0	0	0	0	0
Aestuariisphingobium	0	0	0	0	1	0	0	0	0	0
Aestuariivita	0	0	0	0	1	0	0	0	0	0
Afifella	0	0	0	0	1	0	0	0	0	0
Agarivorans	0	0	0	0	1	0	0	0	0	0
Agitococcus	0	0	0	0	1	0	0	0	0	0
Ahniella	0	0	0	0	1	0	0	0	0	0
Ahrensia	0	0	0	0	1	0	0	0	1	0
Aidingimonas	0	0	0	0	1	0	0	0	0	0
Akkermansia	0	0	0	0	1	0	0	0	0	0
Albidovulum	0	0	0	0	1	0	0	0	0	0
Alcaligenes	0	0	0	0	1	0	0	0	0	0
Alcanivorax	0	0	0	0	1	0	0	0	0	0
Algibacter	0	0	0	0	1	0	0	0	0	0
Algicola	0	0	0	0	1	0	0	0	0	0
Algiphilus	0	0	0	0	1	0	0	0	0	0
Alicyclobacillus	0	0	0	0	1	0	0	0	0	0
Aliiarcobacter	0	0	0	0	1	0	0	0	0	0
Aliidiomarina	0	0	0	0	1	0	0	0	0	0
Aliifodinibius	0	0	0	0	1	0	0	0	0	0
Aliikangiella	0	0	0	0	1	0	0	0	0	0
Aliivibrio	0	0	0	0	1	0	0	0	0	0
Aliterella	0	0	0	0	1	0	0	0	0	0
Alkalibacter	0	0	0	0	1	0	0	0	0	0
Alkalibaculum	0	0	0	0	1	0	0	0	0	0
Alkaliflexus	0	0	0	0	1	0	0	0	0	0
Alkalilimnicola	0	0	0	0	1	0	0	0	0	0
Alkalinema	0	0	0	0	1	0	0	0	0	0
Alkaliphilus	0	0	0	0	1	0	0	0	0	0
Alkalitalea	0	0	0	0	1	0	0	0	0	0
Allobacillus	0	0	0	0	1	0	0	0	0	0
Allochromatium	0	0	0	0	1	0	0	0	0	0
Alloiococcus	0	0	0	0	1	0	0	0	0	0
Allopseudarcicella	0	0	0	0	1	0	0	0	0	0
Allorhizocola	0	0	0	0	1	0	0	0	0	0
Alloscardovia	0	0	0	0	1	0	0	0	0	0
Alsobacter	0	0	0	0	1	0	0	0	0	0
Alteribacillus	0	0	0	0	1	0	0	0	0	0
Altibacter	0	0	0	0	1	0	0	0	0	0
Alysiella	0	0	0	0	1	0	0	0	0	0
Amantichitinum	0	0	0	0	1	0	0	0	0	0
Aminivibrio	0	0	0	0	1	0	0	0	0	0
Aminobacter	0	0	0	0	1	0	0	0	0	0
Ammonifex	0	0	0	0	1	0	0	0	0	0
Amnibacterium	0	0	0	0	1	0	0	1	0	0
Amorphus	0	0	0	0	1	0	0	0	0	0
Amphiplicatus	0	0	0	0	1	0	0	0	0	0
Amphritea	0	0	0	0	1	0	0	0	0	0
Amylibacter	0	0	0	0	1	0	0	0	0	0
Anaerobacillus	0	0	0	0	1	0	0	0	0	0
Anaerobacterium	0	0	0	0	1	0	0	0	0	0
Anaerobium	0	0	0	0	1	0	0	0	0	0
Anaerobutyricum	0	0	0	0	1	0	0	0	0	0
Anaerocolumna	0	0	0	0	1	0	0	0	0	0
Anaerofilum	0	0	0	0	1	0	0	0	0	0
Anaerohalosphaera	0	0	0	0	1	0	0	0	0	0
Anaerolinea	0	0	0	0	1	0	0	0	0	0
Anaeromusa	0	0	0	0	1	0	0	0	0	0
Anaeromyxobacter	0	0	0	0	1	0	0	0	0	0
Anaerophaga	0	0	0	0	1	0	0	0	0	0
Anaerosacchariphilus	0	0	0	0	1	0	0	0	0	0
Anaerosalibacter	0	0	0	0	1	0	0	0	0	0
Anaerospora	0	0	0	0	1	0	0	0	0	0
Anaerosporobacter	0	0	0	0	1	0	0	0	0	0
Anaerotignum	0	0	0	0	1	0	0	0	0	0
Anaerotruncus	0	0	0	0	1	1	0	0	0	0
Anaerovirgula	0	0	0	0	1	0	0	0	0	0
Anaplasma	0	0	0	0	1	0	0	0	0	0
Ancrocorticia	0	0	0	0	1	0	0	0	0	0
Ancylobacter	0	0	0	0	1	0	0	0	0	0
Anderseniella	0	0	0	0	1	0	0	0	0	0
Anditalea	0	0	0	0	1	0	0	0	0	0
Aneurinibacillus	0	0	0	0	1	0	0	0	0	0
Anoxybacillus	0	0	0	0	1	0	0	1	0	0
Anseongella	0	0	0	0	1	0	0	0	0	0
Antarcticibacterium	0	0	0	0	1	0	0	0	0	0
Antarctobacter	0	0	0	0	1	0	0	0	0	0
Aphanizomenon	0	0	0	0	1	0	0	0	0	0
Aphanocapsa	0	0	0	0	1	0	0	0	0	0
Aphanothece	0	0	0	0	1	0	0	0	0	0
Apibacter	0	0	0	0	1	0	0	0	0	0
Aquabacter	0	0	0	0	1	0	0	0	0	0
Aquamicrobium	0	0	0	0	1	0	0	1	0	0
Aquicella	0	0	0	0	1	0	0	0	0	0
Aquidulcibacter	0	0	0	0	1	0	0	0	0	0
Aquifex	0	0	0	0	1	0	0	0	0	0
Aquiflexum	0	0	0	0	1	0	0	0	0	0
Aquirufa	0	0	0	0	1	0	0	0	0	0
Aquisphaera	0	0	0	0	1	0	0	0	0	0
Arabia	0	0	0	0	1	0	0	0	0	0
Arboricoccus	0	0	0	0	1	0	0	0	0	0
Arcanobacterium	0	0	0	0	1	0	0	1	0	0
Arcicella	0	0	0	0	1	0	0	0	0	0
Arcticibacter	0	0	0	0	1	0	0	0	0	0
Ardenticatena	0	0	0	0	1	0	0	0	0	0
Arenimonas	0	0	0	0	1	0	0	0	0	0
Arsenicibacter	0	0	0	0	1	0	0	0	0	0
Arsenicitalea	0	0	0	0	1	0	0	0	0	0
Arsenophonus	0	0	0	0	1	0	0	0	0	0
Arundinibacter	0	0	0	0	1	0	0	0	0	0
Asaia	0	0	0	0	1	0	0	0	0	0
Asanoa	0	0	0	0	1	0	0	0	0	0
Atlantibacter	0	0	0	0	1	0	0	0	0	0
Atopobacter	0	0	0	0	1	0	0	0	0	0
Atopococcus	0	0	0	0	1	0	0	0	0	0
Aurantimicrobium	0	0	0	0	1	0	0	1	0	0
Aurantimonas	0	0	0	0	1	0	0	0	0	0
Aureibacillus	0	0	0	0	1	0	0	0	0	0
Aureispira	0	0	0	0	1	0	0	0	0	0
Avibacterium	0	0	0	0	1	0	0	0	0	0
Azonexus	0	0	0	0	1	0	0	0	0	0
Azorhizobium	0	0	0	0	1	0	0	0	0	0
Azotobacter	0	0	0	0	1	0	0	0	0	0
Bacilliculturomica	0	0	0	0	1	0	0	0	0	0
Bariatricus	0	0	0	0	1	0	0	0	0	0
Barnesiella	0	0	0	0	1	1	0	0	0	0
Bartonella	0	0	0	0	1	0	0	0	0	0
Basilea	0	0	0	0	1	0	0	0	0	0
Bavariicoccus	0	0	0	0	1	0	0	0	0	0
Beijerinckia	0	0	0	0	1	0	0	0	0	0
Belliella	0	0	0	0	1	0	0	0	0	0
Bellilinea	0	0	0	0	1	0	0	0	0	0
Bergeriella	0	0	0	0	1	0	0	0	0	0
Bermanella	0	0	0	0	1	0	0	0	0	0
Bernardetia	0	0	0	0	1	0	0	0	0	0
Bhargavaea	0	0	0	0	1	0	0	0	0	0
Bibersteinia	0	0	0	0	1	0	0	0	0	0
Bilophila	0	0	0	0	1	0	0	0	0	0
Biostraticola	0	0	0	0	1	0	0	0	0	0
Bittarella	0	0	0	0	1	0	0	0	0	0
Blastomonas	0	0	0	0	1	0	0	0	0	0
Blattabacterium	0	0	0	0	1	0	0	0	0	0
Borrelia	0	0	0	0	1	0	0	0	0	0
Borreliella	0	0	0	0	1	0	0	0	0	0
Botryobacter	0	0	0	0	1	0	0	0	0	0
Branchiibius	0	0	0	0	1	0	0	0	0	0
Brenneria	0	0	0	0	1	0	0	0	0	0
Breoghania	0	0	0	0	1	0	0	0	0	0
Brevifollis	0	0	0	0	1	0	0	0	0	0
Brockia	0	0	0	0	1	0	0	0	0	0
Brucella	0	0	0	0	1	0	0	0	0	0
Brumimicrobium	0	0	0	0	1	0	0	0	0	0
Bryobacter	0	0	0	0	1	0	0	0	0	0
Buchnera	0	0	0	0	1	0	0	0	0	0
Budvicia	0	0	0	0	1	0	0	0	0	0
Buttiauxella	0	0	0	0	1	0	0	0	0	0
Butyricimonas	0	0	0	0	1	0	0	0	0	0
Bythopirellula	0	0	0	0	1	0	0	0	0	0
Caedimonas	0	0	0	0	1	0	0	0	0	0
Caenimonas	0	0	0	0	1	0	0	0	0	0
Caenispirillum	0	0	0	0	1	0	0	0	0	0
Caldanaerobius	0	0	0	0	1	0	0	0	0	0
Caldibacillus	0	0	0	0	1	0	0	0	0	0
Caldilinea	0	0	0	0	1	0	0	0	0	0
Caldimicrobium	0	0	0	0	1	0	0	0	0	0
Caldisericum	0	0	0	0	1	0	0	0	0	0
Calidifontibacter	0	0	0	0	1	0	0	1	0	0
Caloramator	0	0	0	0	1	0	0	0	0	0
Calothrix	0	0	0	0	1	0	0	0	0	0
Caminibacter	0	0	0	0	1	0	0	0	0	0
Caminicella	0	0	0	0	1	0	0	0	0	0
Candidatus Acididesulfobacter	0	0	0	0	1	0	0	0	0	0
Candidatus Acidulodesulfobacterium	0	0	0	0	1	0	0	0	0	0
Candidatus Aegiribacteria	0	0	0	0	1	0	0	0	0	0
Candidatus Amoebophilus	0	0	0	0	1	0	0	0	0	0
Candidatus Aquiluna	0	0	0	0	1	0	0	0	0	0
Candidatus Arthromitus	0	0	0	0	1	0	0	0	0	0
Candidatus Babela	0	0	0	0	1	0	0	0	0	0
Candidatus Bipolaricaulis	0	0	0	0	1	0	0	0	0	0
Candidatus Brocadia	0	0	0	0	1	0	0	0	0	0
Candidatus Carbobacillus	0	0	0	0	1	0	0	0	0	0
Candidatus Chloroploca	0	0	0	0	1	0	0	0	0	0
Candidatus Cloacimonas	0	0	0	0	1	0	0	0	0	0
Candidatus Competibacter	0	0	0	0	1	0	0	0	0	0
Candidatus Contendobacter	0	0	0	0	1	0	0	0	0	0
Candidatus Cryosericum	0	0	0	0	1	0	0	0	0	0
Candidatus Deianiraea	0	0	0	0	1	0	0	0	0	0
Candidatus Desulforudis	0	0	0	0	1	0	0	0	0	0
Candidatus Electronema	0	0	0	0	1	0	0	0	0	0
Candidatus Endobugula	0	0	0	0	1	0	0	0	0	0
Candidatus Endolissoclinum	0	0	0	0	1	0	0	0	0	0
Candidatus Entotheonella	0	0	0	0	1	0	0	0	0	0
Candidatus Fermentibacter	0	0	0	0	1	0	0	0	0	0
Candidatus Finniella	0	0	0	0	1	0	0	0	0	0
Candidatus Glomeribacter	0	0	0	0	1	0	0	0	0	0
Candidatus Hamiltonella	0	0	0	0	1	0	0	0	0	0
Candidatus Izimaplasma	0	0	0	0	1	0	0	0	0	0
Candidatus Jettenia	0	0	0	0	1	0	0	0	0	0
Candidatus Jidaibacter	0	0	0	0	1	0	0	0	0	0
Candidatus Kentron	0	0	0	0	1	0	0	0	0	0
Candidatus Koribacter	0	0	0	0	1	0	0	0	0	0
Candidatus Kryptobacter	0	0	0	0	1	0	0	0	0	0
Candidatus Kuenenia	0	0	0	0	1	0	0	0	0	0
Candidatus Magnetaquicoccus	0	0	0	0	1	0	0	1	0	0
Candidatus Magnetobacterium	0	0	0	0	1	0	0	0	0	0
Candidatus Magnetoglobus	0	0	0	0	1	0	0	0	0	0
Candidatus Magnetomorum	0	0	0	0	1	0	0	0	0	0
Candidatus Methylopumilus	0	0	0	0	1	0	0	0	0	0
Candidatus Methyloumidiphilus	0	0	0	0	1	0	0	0	0	0
Candidatus Midichloria	0	0	0	0	1	0	0	0	0	0
Candidatus Moduliflexus	0	0	0	0	1	0	0	0	0	0
Candidatus Nanopelagicus	0	0	0	0	1	0	0	0	0	0
Candidatus Nephrothrix	0	0	0	0	1	0	0	0	0	0
Candidatus Nitrosoglobus	0	0	0	0	1	0	0	0	0	0
Candidatus Nitrotoga	0	0	0	0	1	0	0	0	0	0
Candidatus Nucleicultrix	0	0	0	0	1	0	0	0	0	0
Candidatus Odyssella	0	0	0	0	1	0	0	0	0	0
Candidatus Omnitrophus	0	0	0	0	1	0	0	0	0	0
Candidatus Paracaedibacter	0	0	0	0	1	0	0	0	0	0
Candidatus Paracaedimonas	0	0	0	0	1	0	0	0	0	0
Candidatus Pelagibacter	0	0	0	0	1	0	0	0	0	0
Candidatus Peribacter	0	0	0	0	1	0	0	0	0	0
Candidatus Planktophila	0	0	0	0	1	0	0	0	0	0
Candidatus Promineofilum	0	0	0	0	1	0	0	0	0	0
Candidatus Protochlamydia	0	0	0	0	1	0	0	0	0	0
Candidatus Puniceispirillum	0	0	0	0	1	0	0	0	0	0
Candidatus Regiella	0	0	0	0	1	0	0	0	0	0
Candidatus Rhabdochlamydia	0	0	0	0	1	0	0	0	0	0
Candidatus Rubidus	0	0	0	0	1	0	0	0	0	0
Candidatus Soleaferrea	0	0	0	0	1	0	0	0	0	0
Candidatus Solibacter	0	0	0	0	1	0	0	0	0	0
Candidatus Stoquefichus	0	0	0	0	1	0	0	0	0	0
Candidatus Sulfobium	0	0	0	0	1	0	0	0	0	0
Candidatus Sulfopaludibacter	0	0	0	0	1	0	0	1	0	0
Candidatus Sulfotelmatobacter	0	0	0	0	1	0	0	0	0	0
Candidatus Sulfotelmatomonas	0	0	0	0	1	0	0	0	0	0
Candidatus Syntrophosphaera	0	0	0	0	1	0	0	0	0	0
Candidatus Tenderia	0	0	0	0	1	0	0	0	0	0
Candidatus Thiodiazotropha	0	0	0	0	1	0	0	0	0	0
Candidatus Thioglobus	0	0	0	0	1	0	0	0	0	0
Candidatus Thiosymbion	0	0	0	0	1	0	0	0	0	0
Candidatus Tokpelaia	0	0	0	0	1	0	0	0	0	0
Candidatus Tremblaya	0	0	0	0	1	0	0	0	0	0
Candidatus Vecturithrix	0	0	0	0	1	0	0	0	0	0
Candidimonas	0	0	0	0	1	0	0	0	0	0
Capsulimonas	0	0	0	0	1	0	0	1	0	0
Carboxydocella	0	0	0	0	1	0	0	0	0	0
Carboxydothermus	0	0	0	0	1	0	0	0	0	0
Carboxylicivirga	0	0	0	0	1	0	0	1	0	0
Carnimonas	0	0	0	0	1	0	0	0	0	0
Castellaniella	0	0	0	0	1	0	0	0	0	0
Catabacter	0	0	0	0	1	0	0	0	0	0
Catalinimonas	0	0	0	0	1	0	0	0	0	0
Catelliglobosispora	0	0	0	0	1	0	0	0	0	0
Catenulispora	0	0	0	0	1	0	0	0	0	0
Cecembia	0	0	0	0	1	0	0	0	0	0
Cedecea	0	0	0	0	1	0	0	0	0	0
Cellulophaga	0	0	0	0	1	0	0	0	0	0
Cellulosilyticum	0	0	0	0	1	0	0	0	0	0
Cellulosimicrobium	0	0	0	0	1	0	0	1	0	0
Cephaloticoccus	0	0	0	0	1	0	0	0	0	0
Cerasibacillus	0	0	0	0	1	0	0	0	0	0
Cereibacter	0	0	0	0	1	0	0	0	0	0
Cetobacterium	0	0	0	0	1	0	0	0	0	0
Chakrabartia	0	0	0	0	1	0	0	0	0	0
Chamaesiphon	0	0	0	0	1	0	0	0	0	0
Chelatococcus	0	0	0	0	1	0	0	0	0	0
Chishuiella	0	0	0	0	1	0	0	0	0	0
Chitinilyticum	0	0	0	0	1	0	0	0	0	0
Chitinimonas	0	0	0	0	1	0	0	0	0	0
Chitiniphilus	0	0	0	0	1	0	0	0	0	0
Chitinivorax	0	0	0	0	1	0	0	0	0	0
Chitinolyticbacter	0	0	0	0	1	0	0	0	0	0
Chloracidobacterium	0	0	0	0	1	0	0	0	0	0
Chlorogloea	0	0	0	0	1	0	0	0	0	0
Chlorogloeopsis	0	0	0	0	1	0	0	0	0	0
Chondrocystis	0	0	0	0	1	0	0	0	0	0
Christensenella	0	0	0	0	1	0	0	0	0	0
Chromohalobacter	0	0	0	0	1	0	0	0	0	0
Chryseolinea	0	0	0	0	1	0	0	0	0	0
Chryseotalea	0	0	0	0	1	0	0	0	0	0
Chrysiogenes	0	0	0	0	1	0	0	0	0	0
Chrysosporum	0	0	0	0	1	0	0	0	0	0
Clavibacter	0	0	0	0	1	0	0	1	0	0
Cloacibacillus	0	0	0	0	1	0	0	0	0	0
Cloacibacterium	0	0	0	0	1	0	0	0	0	0
Cnuella	0	0	0	0	1	0	0	0	0	0
Cobetia	0	0	0	0	1	0	0	1	0	0
Cohaesibacter	0	0	0	0	1	0	0	0	0	0
Conchiformibius	0	0	0	0	1	0	0	0	0	0
Conexibacter	0	0	0	0	1	0	0	1	0	0
Confluentibacter	0	0	0	0	1	0	0	0	0	0
Conservatibacter	0	0	0	0	1	0	0	0	0	0
Coprobacter	0	0	0	0	1	0	0	0	0	0
Corticimicrobacter	0	0	0	0	1	0	0	0	0	0
Coxiella	0	0	0	0	1	0	0	0	0	0
Crassaminicella	0	0	0	0	1	0	0	0	0	0
Crateriforma	0	0	0	0	1	0	0	0	0	0
Crenalkalicoccus	0	0	0	0	1	0	0	0	0	0
Crenobacter	0	0	0	0	1	0	0	0	0	0
Crenothrix	0	0	0	0	1	0	0	0	0	0
Cricetibacter	0	0	0	0	1	0	0	0	0	0
Criibacterium	0	0	0	0	1	0	0	0	0	0
Croceibacter	0	0	0	0	1	0	0	0	0	0
Croceitalea	0	0	0	0	1	1	0	0	0	0
Crocosphaera	0	0	0	0	1	0	0	0	0	0
Crossiella	0	0	0	0	1	0	0	0	0	0
Cruoricaptor	0	0	0	0	1	0	0	0	0	0
Cryptosporangium	0	0	0	0	1	0	0	1	0	0
Cucumibacter	0	0	0	0	1	0	0	0	0	0
Cyanobacterium	0	0	0	0	1	0	0	0	0	0
Cyanothece	0	0	0	0	1	0	0	0	0	0
Cycloclasticus	0	0	0	0	1	0	0	0	0	0
Cylindrospermopsis	0	0	0	0	1	0	0	0	0	0
Cylindrospermum	0	0	0	0	1	0	0	0	0	0
Cysteiniphilum	0	0	0	0	1	0	0	0	0	0
Cystobacter	0	0	0	0	1	0	0	0	0	0
Dactylosporangium	0	0	0	0	1	0	0	0	0	0
Dasania	0	0	0	0	1	0	0	0	0	0
Deefgea	0	0	0	0	1	0	0	0	0	0
Dehalobacterium	0	0	0	0	1	0	0	1	0	0
Dehalococcoides	0	0	0	0	1	0	0	0	0	0
Deminuibacter	0	0	0	0	1	0	0	0	0	0
Dendrosporobacter	0	0	0	0	1	0	0	0	0	0
Denitratisoma	0	0	0	0	1	0	0	0	0	0
Denitrobacterium	0	0	0	0	1	0	0	0	0	0
Denitromonas	0	0	0	0	1	0	0	0	0	0
Denitrovibrio	0	0	0	0	1	0	0	0	0	0
Derxia	0	0	0	0	1	0	0	0	0	0
Desemzia	0	0	0	0	1	0	0	0	0	0
Desertiactinospora	0	0	0	0	1	0	0	0	0	0
Desertifilum	0	0	0	0	1	0	0	0	0	0
Desertihabitans	0	0	0	0	1	0	0	0	0	0
Desmospora	0	0	0	0	1	0	0	0	0	0
Desulfacinum	0	0	0	0	1	0	0	0	0	0
Desulfamplus	0	0	0	0	1	0	0	0	0	0
Desulfatibacillum	0	0	0	0	1	0	0	0	0	0
Desulfatitalea	0	0	0	0	1	0	0	0	0	0
Desulfitobacterium	0	0	0	0	1	0	0	0	0	0
Desulfobacca	0	0	0	0	1	0	0	0	0	0
Desulfobotulus	0	0	0	0	1	0	0	0	0	0
Desulfobulbus	0	0	0	0	1	0	0	0	0	0
Desulfocapsa	0	0	0	0	1	0	0	0	0	0
Desulfococcus	0	0	0	0	1	0	0	0	0	0
Desulfocucumis	0	0	0	0	1	0	0	0	0	0
Desulfocurvibacter	0	0	0	0	1	0	0	0	0	0
Desulfocurvus	0	0	0	0	1	0	0	0	0	0
Desulfofaba	0	0	0	0	1	0	0	0	0	0
Desulfofarcimen	0	0	0	0	1	0	0	0	0	0
Desulfofundulus	0	0	0	0	1	0	0	0	0	0
Desulfofustis	0	0	0	0	1	0	0	0	0	0
Desulfoglaeba	0	0	0	0	1	0	0	0	0	0
Desulfohalovibrio	0	0	0	0	1	0	0	0	0	0
Desulfomicrobium	0	0	0	0	1	0	0	0	0	0
Desulfomonile	0	0	0	0	1	0	0	0	0	0
Desulfonatronum	0	0	0	0	1	0	0	0	0	0
Desulfonema	0	0	0	0	1	0	0	0	0	0
Desulforegula	0	0	0	0	1	0	0	0	0	0
Desulforhopalus	0	0	0	0	1	0	0	0	0	0
Desulfosarcina	0	0	0	0	1	0	0	0	0	0
Desulfotignum	0	0	0	0	1	0	0	0	0	0
Desulfotomaculum	0	0	0	0	1	0	0	0	0	0
Desulfurella	0	0	0	0	1	0	0	0	0	0
Desulfuribacillus	0	0	0	0	1	0	0	0	0	0
Desulfurivibrio	0	0	0	0	1	0	0	0	0	0
Desulfurobacterium	0	0	0	0	1	0	0	0	0	0
Desulfuromonas	0	0	0	0	1	0	0	0	0	0
Dethiosulfovibrio	0	0	0	0	1	0	0	0	0	0
Devriesea	0	0	0	0	1	0	0	0	0	0
Dickeya	0	0	0	0	1	0	0	0	0	0
Dictyobacter	0	0	0	0	1	0	0	0	0	0
Dictyoglomus	0	0	0	0	1	0	0	0	0	0
Dielma	0	0	0	0	1	0	0	0	0	0
Dissulfuribacter	0	0	0	0	1	0	0	0	0	0
Dokdonia	0	0	0	0	1	0	0	0	0	0
Dolichospermum	0	0	0	0	1	0	0	1	0	0
Domibacillus	0	0	0	0	1	0	0	0	0	0
Dorea	0	0	0	0	1	0	0	1	0	0
Draconibacterium	0	0	0	0	1	0	0	0	0	0
Drancourtella	0	0	0	0	1	0	0	0	0	0
Duncaniella	0	0	0	0	1	0	0	0	0	0
Echinicola	0	0	0	0	1	0	0	0	0	0
Ectothiorhodosinus	0	0	0	0	1	0	0	0	0	0
Ectothiorhodospira	0	0	0	0	1	0	0	0	0	0
Edwardsiella	0	0	0	0	1	0	0	0	0	0
Ehrlichia	0	0	0	0	1	0	0	0	0	0
Eikenella	0	0	0	0	1	0	0	0	0	0
Eilatimonas	0	0	0	0	1	0	0	0	0	0
Eisenbergiella	0	0	0	0	1	0	0	0	0	0
Eisenibacter	0	0	0	0	1	0	0	0	0	0
Elioraea	0	0	0	0	1	0	0	0	0	0
Elizabethkingia	0	0	0	0	1	0	0	0	0	0
Elstera	0	0	0	0	1	0	0	0	0	0
Elusimicrobium	0	0	0	0	1	0	0	0	0	0
Embleya	0	0	0	0	1	0	0	0	0	0
Emcibacter	0	0	0	0	1	0	0	0	0	0
Emergencia	0	0	0	0	1	0	0	0	0	0
Endomicrobium	0	0	0	0	1	0	0	0	0	0
Enhydrobacter	0	0	0	0	1	0	0	0	0	0
Enhygromyxa	0	0	0	0	1	0	0	0	0	0
Ensifer	0	0	0	0	1	0	0	0	0	0
Enterorhabdus	0	0	0	0	1	0	0	0	0	0
Enterovibrio	0	0	0	0	1	0	0	0	0	0
Enterovirga	0	0	0	0	1	0	0	0	0	0
Eoetvoesia	0	0	0	0	1	0	0	0	0	0
Ephemeroptericola	0	0	0	0	1	0	0	0	0	0
Epulopiscium	0	0	0	0	1	0	0	0	0	0
Ereboglobus	0	0	0	0	1	0	0	0	0	0
Eremococcus	0	0	0	0	1	0	0	0	0	0
Erysipelatoclostridium	0	0	0	0	1	0	0	0	0	0
Erysipelothrix	0	0	0	0	1	0	0	0	0	0
Erythrobacter	0	0	0	0	1	0	0	0	0	0
Estrella	0	0	0	0	1	0	0	0	0	0
Eudoraea	0	0	0	0	1	0	0	0	0	0
Euhalothece	0	0	0	0	1	0	0	0	0	0
Euzebya	0	0	0	0	1	0	0	0	0	0
Ewingella	0	0	0	0	1	0	0	0	0	0
Extensimonas	0	0	0	0	1	0	0	0	0	0
Fabibacter	0	0	0	0	1	0	0	0	0	0
Faecalicatena	0	0	0	0	1	0	0	0	0	0
Faecalicoccus	0	0	0	0	1	0	0	0	0	0
Falsibacillus	0	0	0	0	1	0	0	0	0	0
Falsirhodobacter	0	0	0	0	1	0	0	0	0	0
Fangia	0	0	0	0	1	0	0	0	0	0
Fenollaria	0	0	0	0	1	0	0	0	0	0
Ferrimonas	0	0	0	0	1	0	0	0	0	0
Ferriphaselus	0	0	0	0	1	0	0	0	0	0
Ferrovibrio	0	0	0	0	1	0	0	0	0	0
Ferruginibacter	0	0	0	0	1	0	0	0	0	0
Fervidobacterium	0	0	0	0	1	0	0	0	0	0
Fibrisoma	0	0	0	0	1	0	0	0	0	0
Filobacillus	0	0	0	0	1	0	0	0	0	0
Filomicrobium	0	0	0	0	1	0	0	0	0	0
Fimbriiglobus	0	0	0	0	1	0	0	0	0	0
Fimbriimonas	0	0	0	0	1	0	0	0	0	0
Flagellimonas	0	0	0	0	1	0	0	0	0	0
Flammeovirga	0	0	0	0	1	0	0	0	0	0
Flavicella	0	0	0	0	1	0	0	0	0	0
Flavimaricola	0	0	0	0	1	0	0	0	0	0
Flavipsychrobacter	0	0	0	0	1	0	0	0	0	0
Flaviramulus	0	0	0	0	1	0	0	0	0	0
Flavisolibacter	0	0	0	0	1	0	0	0	0	0
Flexibacter	0	0	0	0	1	0	0	0	0	0
Flexistipes	0	0	0	0	1	0	0	0	0	0
Flexithrix	0	0	0	0	1	0	0	0	0	0
Flexivirga	0	0	0	0	1	0	0	0	0	0
Fluoribacter	0	0	0	0	1	0	0	0	0	0
Fluviicola	0	0	0	0	1	0	0	0	0	0
Fontibacillus	0	0	0	0	1	0	0	0	0	0
Formosa	0	0	0	0	1	0	0	0	0	0
Franconibacter	0	0	0	0	1	0	0	0	0	0
Frateuria	0	0	0	0	1	0	0	0	0	0
Frisingicoccus	0	0	0	0	1	0	0	0	0	0
Frondihabitans	0	0	0	0	1	0	0	1	0	0
Fructobacillus	0	0	0	0	1	0	0	0	0	0
Fulvimarina	0	0	0	0	1	0	0	0	0	0
Fulvivirga	0	0	0	0	1	0	0	0	0	0
Gabonia	0	0	0	0	1	0	0	0	0	0
Gaetbulibacter	0	0	0	0	1	0	0	0	0	0
Gaiella	0	0	0	0	1	0	0	0	0	0
Galactobacter	0	0	0	0	1	0	0	0	0	0
Galbibacter	0	0	0	0	1	0	0	0	0	0
Gallaecimonas	0	0	0	0	1	0	0	0	0	0
Gallionella	0	0	0	0	1	0	0	0	0	0
Garciella	0	0	0	0	1	0	0	0	0	0
Gelidibacter	0	0	0	0	1	0	0	0	0	0
Geminisphaera	0	0	0	0	1	0	0	0	0	0
Geminocystis	0	0	0	0	1	0	0	0	0	0
Geoalkalibacter	0	0	0	0	1	0	0	0	0	0
Geobacter	0	0	0	0	1	0	0	1	0	0
Geomicrobium	0	0	0	0	1	0	0	0	0	0
Georgenia	0	0	0	0	1	0	0	1	0	0
Georhizobium	0	0	0	0	1	0	0	1	0	0
Geosporobacter	0	0	0	0	1	0	0	0	0	0
Geothermobacter	0	0	0	0	1	0	0	0	0	0
Geothrix	0	0	0	0	1	0	0	0	0	0
Gibbsiella	0	0	0	0	1	0	0	0	0	0
Giesbergeria	0	0	0	0	1	0	0	0	0	0
Gilliamella	0	0	0	0	1	0	0	0	0	0
Gilvimarinus	0	0	0	0	1	0	0	0	0	0
Gimesia	0	0	0	0	1	0	0	0	0	0
Glaciecola	0	0	0	0	1	0	0	0	0	0
Glaciimonas	0	0	0	0	1	0	0	0	0	0
Glaesserella	0	0	0	0	1	0	0	0	0	0
Gleimia	0	0	0	0	1	0	0	0	0	0
Globicatella	0	0	0	0	1	0	0	0	0	0
Gloeobacter	0	0	0	0	1	0	0	0	0	0
Gloeocapsa	0	0	0	0	1	0	0	1	0	0
Gloeothece	0	0	0	0	1	0	0	1	0	0
Gluconacetobacter	0	0	0	0	1	0	0	0	0	0
Gluconobacter	0	0	0	0	1	0	0	0	0	0
Gordonibacter	0	0	0	0	1	0	0	0	0	0
Gorillibacterium	0	0	0	0	1	0	0	1	0	0
Gracilibacter	0	0	0	0	1	0	0	0	0	0
Gracilimonas	0	0	0	0	1	0	0	0	0	0
Gramella	0	0	0	0	1	0	0	0	0	0
Granulosicoccus	0	0	0	0	1	0	0	0	0	0
Gudongella	0	0	0	0	1	0	0	0	0	0
Gulbenkiania	0	0	0	0	1	0	0	0	0	0
Gynurincola	0	0	0	0	1	0	0	0	0	0
Haematomicrobium	0	0	0	0	1	0	0	0	0	0
Haematospirillum	0	0	0	0	1	0	0	0	0	0
Hahella	0	0	0	0	1	0	0	0	0	0
Halanaerobium	0	0	0	0	1	0	0	0	0	0
Halarcobacter	0	0	0	0	1	0	0	0	0	0
Halarsenatibacter	0	0	0	0	1	0	0	0	0	0
Haliangium	0	0	0	0	1	0	0	0	0	0
Haliea	0	0	0	0	1	0	0	0	0	0
Halioglobus	0	0	0	0	1	0	0	0	0	0
Haliscomenobacter	0	0	0	0	1	0	0	0	0	0
Haloactinobacterium	0	0	0	0	1	0	0	0	0	0
Haloactinopolyspora	0	0	0	0	1	0	0	0	0	0
Halobacillus	0	0	0	0	1	0	0	0	0	0
Halobacteriovorax	0	0	0	0	1	0	0	0	0	0
Halocella	0	0	0	0	1	0	0	0	0	0
Halodesulfovibrio	0	0	0	0	1	0	0	0	0	0
Haloferula	0	0	0	0	1	0	0	0	0	0
Halofilum	0	0	0	0	1	0	0	0	0	0
Halolactibacillus	0	0	0	0	1	0	0	0	0	0
Halomicronema	0	0	0	0	1	0	0	0	0	0
Halonatronum	0	0	0	0	1	0	0	0	0	0
Haloplasma	0	0	0	0	1	0	0	0	0	0
Halotalea	0	0	0	0	1	0	0	0	0	0
Halothermothrix	0	0	0	0	1	0	0	0	0	0
Halothiobacillus	0	0	0	0	1	0	0	0	0	0
Hartmannibacter	0	0	0	0	1	0	0	0	0	0
Hasllibacter	0	0	0	0	1	0	0	0	0	0
Hassallia	0	0	0	0	1	0	0	0	0	0
Hazenella	0	0	0	0	1	0	0	0	0	0
Heliophilum	0	0	0	0	1	0	0	0	0	0
Herbidospora	0	0	0	0	1	0	0	0	0	0
Herminiimonas	0	0	0	0	1	0	0	0	0	0
Hespellia	0	0	0	0	1	0	0	0	0	0
Hoeflea	0	0	0	0	1	0	0	0	0	0
Holdemanella	0	0	0	0	1	0	0	1	0	0
Holdemania	0	0	0	0	1	0	0	0	0	0
Holospora	0	0	0	0	1	0	0	0	0	0
Hormoscilla	0	0	0	0	1	0	0	0	0	0
Hoyosella	0	0	0	0	1	0	0	0	0	0
Hugenholtzia	0	0	0	0	1	0	0	0	0	0
Humibacillus	0	0	0	0	1	0	0	0	0	0
Humibacter	0	0	0	0	1	0	0	1	0	0
Hungateiclostridium	0	0	0	0	1	0	0	0	0	0
Hwanghaeella	0	0	0	0	1	0	0	0	0	0
Hwanghaeicola	0	0	0	0	1	0	0	0	0	0
Hydrococcus	0	0	0	0	1	0	0	0	0	0
Hydrocoleum	0	0	0	0	1	0	0	0	0	0
Hydrogenispora	0	0	0	0	1	0	0	0	0	0
Hydrogenoanaerobacterium	0	0	0	0	1	0	0	0	0	0
Hydrogenothermus	0	0	0	0	1	0	0	0	0	0
Hydrogenovibrio	0	0	0	0	1	0	0	0	0	0
Hydrotalea	0	0	0	0	1	0	0	0	0	0
Hylemonella	0	0	0	0	1	0	0	0	0	0
Hyphobacterium	0	0	0	0	1	0	0	0	0	0
Hyunsoonleella	0	0	0	0	1	0	0	0	0	0
Ichthyenterobacterium	0	0	0	0	1	0	0	0	0	0
Idiomarina	0	0	0	0	1	0	0	0	0	0
Ignatzschineria	0	0	0	0	1	0	0	0	0	0
Ignavigranum	0	0	0	0	1	0	0	0	0	0
Ilumatobacter	0	0	0	0	1	0	0	0	0	0
Ilyomonas	0	0	0	0	1	0	0	0	0	0
Indioceanicola	0	0	0	0	1	0	0	0	0	0
Inhella	0	0	0	0	1	0	0	0	0	0
Inordinaticella	0	0	0	0	1	0	0	0	0	0
Insolitispirillum	0	0	0	0	1	0	0	0	0	0
Intestinibacillus	0	0	0	0	1	0	0	0	0	0
Intestinimonas	0	0	0	0	1	0	0	0	0	0
Isosphaera	0	0	0	0	1	0	0	0	0	0
Izhakiella	0	0	0	0	1	0	0	0	0	0
Jeongeupia	0	0	0	0	1	0	0	0	0	0
Jeotgalicoccus	0	0	0	0	1	0	1	0	0	0
Jhaorihella	0	0	0	0	1	0	0	0	0	0
Johnsonella	0	0	0	0	1	0	0	0	0	0
Jonesia	0	0	0	0	1	0	0	0	0	0
Joostella	0	0	0	0	1	0	0	0	0	0
Kaistia	0	0	0	0	1	0	0	0	0	0
Kallipyga	0	0	0	0	1	1	0	0	0	0
Kamptonema	0	0	0	0	1	0	0	0	0	0
Kandleria	0	0	0	0	1	0	0	0	0	0
Kangiella	0	0	0	0	1	0	0	1	0	0
Kerstersia	0	0	0	0	1	0	0	0	0	0
Ketobacter	0	0	0	0	1	0	0	0	0	0
Kibdelosporangium	0	0	0	0	1	0	0	0	0	0
Kineococcus	0	0	0	0	1	0	0	0	0	0
Kineosphaera	0	0	0	0	1	0	0	1	0	0
Kineothrix	0	0	0	0	1	0	0	0	0	0
Kiritimatiella	0	0	0	0	1	0	0	0	0	0
Klugiella	0	0	0	0	1	0	0	1	0	0
Kordia	0	0	0	0	1	0	0	0	0	0
Kordiimonas	0	0	0	0	1	0	0	0	0	0
Kosakonia	0	0	0	0	1	0	0	0	0	0
Kosmotoga	0	0	0	0	1	0	0	0	0	0
Kozakia	0	0	0	0	1	0	0	0	0	0
Krasilnikoviella	0	0	0	0	1	0	0	0	0	0
Kushneria	0	0	0	0	1	0	0	0	0	0
Kutzneria	0	0	0	0	1	0	0	0	0	0
Kyrpidia	0	0	0	0	1	0	0	1	0	0
Kytococcus	0	0	0	0	1	0	0	1	0	0
Labedaea	0	0	0	0	1	0	0	1	0	0
Labilibacter	0	0	0	0	1	0	0	0	0	0
Labilibaculum	0	0	0	0	1	0	0	0	0	0
Labilithrix	0	0	0	0	1	0	0	0	0	0
Labrys	0	0	0	0	1	0	0	0	0	0
Laceyella	0	0	0	0	1	0	0	0	0	0
Lachnoanaerobaculum	0	0	0	0	1	0	0	0	0	0
Lacrimispora	0	0	0	0	1	0	0	0	0	0
Lacticigenium	0	0	0	0	1	0	0	0	0	0
Lactimicrobium	0	0	0	0	1	0	0	1	0	0
Lacunisphaera	0	0	0	0	1	0	0	0	0	0
Lamprocystis	0	0	0	0	1	0	0	0	0	0
Lampropedia	0	0	0	0	1	0	0	0	0	0
Lapillicoccus	0	0	0	0	1	0	0	0	0	0
Laribacter	0	0	0	0	1	0	0	0	0	0
Larkinella	0	0	0	0	1	0	0	0	0	0
Leadbetterella	0	0	0	0	1	0	0	0	0	0
Leeuwenhoekiella	0	0	0	0	1	0	0	0	0	0
Leisingera	0	0	0	0	1	0	0	0	0	0
Lelliottia	0	0	0	0	1	0	0	0	0	0
Leminorella	0	0	0	0	1	0	0	0	0	0
Lentimicrobium	0	0	0	0	1	0	0	0	0	0
Leptonema	0	0	0	0	1	0	0	0	0	0
Leptospirillum	0	0	0	0	1	0	0	0	0	0
Liberibacter	0	0	0	0	1	0	0	0	0	0
Lihuaxuella	0	0	0	0	1	0	0	0	0	0
Limimaricola	0	0	0	0	1	0	0	0	0	0
Limnoglobus	0	0	0	0	1	0	0	0	0	0
Limnoraphis	0	0	0	0	1	0	0	0	0	0
Lishizhenia	0	0	0	0	1	0	0	0	0	0
Listeria	0	0	0	0	1	0	0	0	0	0
Litoreibacter	0	0	0	0	1	0	0	0	0	0
Litoribacter	0	0	0	0	1	0	0	0	0	0
Litorimicrobium	0	0	0	0	1	0	0	0	0	0
Longibacter	0	0	0	0	1	0	0	0	0	0
Longicatena	0	0	0	0	1	0	0	0	0	0
Longilinea	0	0	0	0	1	0	0	0	0	0
Longimonas	0	0	0	0	1	0	0	0	0	0
Lucifera	0	0	0	0	1	0	0	0	0	0
Lutimaribacter	0	0	0	0	1	0	0	0	0	0
Lyngbya	0	0	0	0	1	0	0	0	0	0
Lysinimicrobium	0	0	0	0	1	0	0	1	0	0
Macrococcus	0	0	0	0	1	0	0	0	0	0
Magnetococcus	0	0	0	0	1	0	0	0	0	0
Magnetofaba	0	0	0	0	1	0	0	0	0	0
Magnetospira	0	0	0	0	1	0	0	0	0	0
Magnetovibrio	0	0	0	0	1	0	0	0	0	0
Mailhella	0	0	0	0	1	0	0	0	0	0
Maledivibacter	0	0	0	0	1	0	0	0	0	0
Mangrovibacterium	0	0	0	0	1	0	0	0	0	0
Mangrovicoccus	0	0	0	0	1	0	0	0	0	0
Mannheimia	0	0	0	0	1	0	0	0	0	0
Marasmitruncus	0	0	0	0	1	0	0	0	0	0
Maribacter	0	0	0	0	1	0	0	0	0	0
Maribellus	0	0	0	0	1	0	0	0	0	0
Maribius	0	0	0	0	1	0	0	0	0	0
Marichromatium	0	0	0	0	1	0	0	0	0	0
Marinicaulis	0	0	0	0	1	0	0	0	0	0
Marinicella	0	0	0	0	1	0	0	0	0	0
Marinifilum	0	0	0	0	1	0	0	0	0	0
Mariniflexile	0	0	0	0	1	0	0	0	0	0
Marinilabilia	0	0	0	0	1	0	0	0	0	0
Marinilactibacillus	0	0	0	0	1	0	0	0	0	0
Marinimicrobium	0	0	0	0	1	0	0	0	0	0
Marininema	0	0	0	0	1	0	0	1	0	0
Mariniradius	0	0	0	0	1	0	0	0	0	0
Marinitenerispora	0	0	0	0	1	0	0	0	0	0
Marinithermus	0	0	0	0	1	0	0	0	0	0
Marinitoga	0	0	0	0	1	0	0	0	0	0
Marinoscillum	0	0	0	0	1	0	0	0	0	0
Marinospirillum	0	0	0	0	1	0	0	0	0	0
Marinosulfonomonas	0	0	0	0	1	0	0	0	0	0
Mariprofundus	0	0	0	0	1	0	0	0	0	0
Maripseudobacter	0	0	0	0	1	0	0	0	0	0
Marispirochaeta	0	0	0	0	1	0	0	0	0	0
Maritalea	0	0	0	0	1	0	0	0	0	0
Marivirga	0	0	0	0	1	0	0	0	0	0
Marortus	0	0	0	0	1	0	0	0	0	0
Massilimicrobiota	0	0	0	0	1	0	0	0	0	0
Mastigocladus	0	0	0	0	1	0	0	0	0	0
Mastigocoleus	0	0	0	0	1	0	0	0	0	0
Megamonas	0	0	0	0	1	0	0	0	0	0
Melaminivora	0	0	0	0	1	0	0	0	0	0
Melghiribacillus	0	0	0	0	1	0	0	0	0	0
Melghirimyces	0	0	0	0	1	0	0	0	0	0
Melissococcus	0	0	0	0	1	0	0	0	0	0
Melittangium	0	0	0	0	1	0	0	0	0	0
Meridianimaribacter	0	0	0	0	1	0	0	0	0	0
Merismopedia	0	0	0	0	1	0	0	0	0	0
Mesoaciditoga	0	0	0	0	1	0	0	0	0	0
Mesoflavibacter	0	0	0	0	1	0	0	0	0	0
Mesonia	0	0	0	0	1	0	0	0	0	0
Mesoplasma	0	0	0	0	1	0	0	0	0	0
Mesotoga	0	0	0	0	1	0	0	0	0	0
Methylacidiphilum	0	0	0	0	1	0	0	0	0	0
Methylarcula	0	0	0	0	1	0	0	0	0	0
Methylobacillus	0	0	0	0	1	0	0	0	0	0
Methylobacter	0	0	0	0	1	0	0	0	0	0
Methylobrevis	0	0	0	0	1	0	0	0	0	0
Methylocaldum	0	0	0	0	1	0	0	0	0	0
Methyloceanibacter	0	0	0	0	1	0	0	1	0	0
Methylocella	0	0	0	0	1	0	0	1	0	0
Methylococcus	0	0	0	0	1	0	0	0	0	0
Methylocystis	0	0	0	0	1	0	0	0	0	0
Methylogaea	0	0	0	0	1	0	0	0	0	0
Methyloglobulus	0	0	0	0	1	0	0	0	0	0
Methylomagnum	0	0	0	0	1	0	0	0	0	0
Methylomarinum	0	0	0	0	1	0	0	0	0	0
Methylomicrobium	0	0	0	0	1	0	0	0	0	0
Methyloprofundus	0	0	0	0	1	0	0	0	0	0
Methylosarcina	0	0	0	0	1	0	0	0	0	0
Methylosinus	0	0	0	0	1	0	0	0	0	0
Methylotetracoccus	0	0	0	0	1	0	0	0	0	0
Methylovorus	0	0	0	0	1	0	0	0	0	0
Methylovulum	0	0	0	0	1	0	0	0	0	0
Microbispora	0	0	0	0	1	0	0	1	0	0
Microcella	0	0	0	0	1	0	0	1	0	0
Microcoleus	0	0	0	0	1	0	0	0	0	0
Microlunatus	0	0	0	0	1	0	0	1	0	0
Microscilla	0	0	0	0	1	0	0	0	0	0
Microterricola	0	0	0	0	1	0	0	1	0	0
Microtetraspora	0	0	0	0	1	0	0	0	0	0
Microvirgula	0	0	0	0	1	0	0	0	0	0
Millisia	0	0	0	0	1	0	0	0	0	0
Minwuia	0	0	0	0	1	0	0	0	0	0
Mitsuokella	0	0	0	0	1	0	0	0	0	0
Mixta	0	0	0	0	1	0	0	0	0	0
Mobilisporobacter	0	0	0	0	1	0	0	0	0	0
Mongoliibacter	0	0	0	0	1	0	0	0	0	0
Mongoliimonas	0	0	0	0	1	0	0	1	0	0
Moorea	0	0	0	0	1	0	0	0	0	0
Morganella	0	0	0	0	1	0	0	0	0	0
Moritella	0	0	0	0	1	0	0	0	0	0
Motilibacter	0	0	0	0	1	0	0	0	0	0
Motiliproteus	0	0	0	0	1	0	0	0	0	0
Mucinivorans	0	0	0	0	1	0	0	0	0	0
Mumia	0	0	0	0	1	0	0	1	0	0
Muribaculum	0	0	0	0	1	0	0	0	0	0
Mycetohabitans	0	0	0	0	1	0	0	0	0	0
Mycoavidus	0	0	0	0	1	0	0	0	0	0
Mycolicibacillus	0	0	0	0	1	0	0	0	0	0
Mycolicibacter	0	0	0	0	1	0	0	0	0	0
Myroides	0	0	0	0	1	0	0	0	0	0
Naasia	0	0	0	0	1	0	0	1	0	0
Nakamurella	0	0	0	0	1	0	0	1	0	0
Nannocystis	0	0	0	0	1	0	0	0	0	0
Natranaerobius	0	0	0	0	1	0	0	0	0	0
Natranaerovirga	0	0	0	0	1	0	0	0	0	0
Natronincola	0	0	0	0	1	0	0	0	0	0
Nautilia	0	0	0	0	1	0	0	0	0	0
Necropsobacter	0	0	0	0	1	0	0	0	0	0
Negadavirga	0	0	0	0	1	0	0	0	0	0
Neglecta	0	0	0	0	1	0	0	0	0	0
Neiella	0	0	0	0	1	0	0	0	0	0
Neobittarella	0	0	0	0	1	0	0	0	0	0
Neochlamydia	0	0	0	0	1	0	0	0	0	0
Neomegalonema	0	0	0	0	1	0	0	0	0	0
Neorhizobium	0	0	0	0	1	0	0	0	0	0
Neptunomonas	0	0	0	0	1	0	0	0	0	0
Nesiotobacter	0	0	0	0	1	0	0	0	0	0
Niabella	0	0	0	0	1	0	0	0	0	0
Niameybacter	0	0	0	0	1	0	0	0	0	0
Niastella	0	0	0	0	1	0	0	0	0	0
Nisaea	0	0	0	0	1	0	0	0	0	0
Nitratifractor	0	0	0	0	1	0	0	0	0	0
Nitratiruptor	0	0	0	0	1	0	0	0	0	0
Nitriliruptor	0	0	0	0	1	0	0	0	0	0
Nitrincola	0	0	0	0	1	0	0	0	0	0
Nitritalea	0	0	0	0	1	0	0	0	0	0
Nitrobacter	0	0	0	0	1	0	0	0	0	0
Nitrosomonas	0	0	0	0	1	0	0	0	0	0
Nitrosovibrio	0	0	0	0	1	0	0	0	0	0
Nitrospina	0	0	0	0	1	0	0	0	0	0
Nitrospirillum	0	0	0	0	1	0	0	0	0	0
Nodosilinea	0	0	0	0	1	0	0	0	0	0
Nonlabens	0	0	0	0	1	0	0	0	0	0
Notoacmeibacter	0	0	0	0	1	0	0	0	0	0
Novibacillus	0	0	0	0	1	0	0	0	0	0
Nubsella	0	0	0	0	1	0	0	0	0	0
Occallatibacter	0	0	0	0	1	0	0	0	0	0
Occidentia	0	0	0	0	1	0	0	0	0	0
Oceanibaculum	0	0	0	0	1	0	0	0	0	0
Oceanibium	0	0	0	0	1	0	0	0	0	0
Oceanicaulis	0	0	0	0	1	0	0	0	0	0
Oceanicella	0	0	0	0	1	0	0	0	0	0
Oceanicola	0	0	0	0	1	0	0	0	0	0
Oceaniglobus	0	0	0	0	1	0	0	0	0	0
Oceanihabitans	0	0	0	0	1	0	0	0	0	0
Oceanimonas	0	0	0	0	1	0	0	0	0	0
Oceaniovalibus	0	0	0	0	1	0	0	0	0	0
Oceanisphaera	0	0	0	0	1	0	0	0	0	0
Oceanithermus	0	0	0	0	1	0	0	0	0	0
Oceanivirga	0	0	0	0	1	0	0	0	0	0
Oceanobacillus	0	0	0	0	1	0	0	0	0	0
Oceanospirillum	0	0	0	0	1	0	0	0	0	0
Octadecabacter	0	0	0	0	1	0	0	0	0	0
Odoribacter	0	0	0	0	1	0	0	0	0	0
Oenococcus	0	0	0	0	1	0	0	0	0	0
Oerskovia	0	0	0	0	1	0	0	0	0	0
Okeania	0	0	0	0	1	0	0	0	0	0
Oleiphilus	0	0	0	0	1	0	0	0	0	0
Oleomonas	0	0	0	0	1	0	0	0	0	0
Oligella	0	0	0	0	1	0	0	1	0	0
Oligoflexus	0	0	0	0	1	0	0	0	0	0
Olivibacter	0	0	0	0	1	0	0	0	0	0
Olleya	0	0	0	0	1	0	0	0	0	0
Opitutus	0	0	0	0	1	0	0	0	0	0
Orenia	0	0	0	0	1	0	0	0	0	0
Orientia	0	0	0	0	1	0	0	0	0	0
Ornithinicoccus	0	0	0	0	1	0	0	0	0	0
Ornithinimicrobium	0	0	0	0	1	0	0	1	0	0
Oryzomicrobium	0	0	0	0	1	0	0	0	0	0
Oscillatoria	0	0	0	0	1	0	0	0	0	0
Oscillochloris	0	0	0	0	1	0	0	1	0	0
Ottowia	0	0	0	0	1	0	0	0	0	0
Owenweeksia	0	0	0	0	1	0	0	0	0	0
Oxalobacter	0	0	0	0	1	0	0	0	0	0
Paenarthrobacter	0	0	0	0	1	0	0	0	0	0
Paeniclostridium	0	0	0	0	1	0	0	0	0	0
Paenisporosarcina	0	0	0	0	1	0	0	0	0	0
Palleronia	0	0	0	0	1	0	0	0	0	0
Paludibacter	0	0	0	0	1	0	0	0	0	0
Paludibacterium	0	0	0	0	1	0	0	1	0	0
Paludifilum	0	0	0	0	1	0	0	0	0	0
Paludisphaera	0	0	0	0	1	0	0	0	0	0
Pandoraea	0	0	0	0	1	1	0	0	0	1
Paracandidimonas	0	0	0	0	1	0	0	0	0	0
Paraclostridium	0	0	0	0	1	0	0	0	0	0
Paracraurococcus	0	0	0	0	1	0	0	0	0	0
Paraflavitalea	0	0	0	0	1	0	0	0	0	0
Parageobacillus	0	0	0	0	1	0	0	1	0	0
Paraglaciecola	0	0	0	0	1	0	0	0	0	0
Paralcaligenes	0	0	0	0	1	0	0	0	0	0
Paramaledivibacter	0	0	0	0	1	0	0	0	0	0
Paramuribaculum	0	0	0	0	1	0	0	0	0	0
Paraoceanicella	0	0	0	0	1	0	0	0	0	0
Paraoerskovia	0	0	0	0	1	0	0	0	0	0
Parapedobacter	0	0	0	0	1	0	0	0	0	0
Paraperlucidibaca	0	0	0	0	1	0	0	0	0	0
Paraprevotella	0	0	0	0	1	0	0	0	0	0
Pararcticibacter	0	0	0	0	1	0	0	0	0	0
Pararhizobium	0	0	0	0	1	0	0	0	0	0
Pararhodobacter	0	0	0	0	1	0	0	0	0	0
Parasedimentitalea	0	0	0	0	1	0	0	0	0	0
Parasphingorhabdus	0	0	0	0	1	0	0	0	0	0
Parasporobacterium	0	0	0	0	1	0	0	0	0	0
Parasutterella	0	0	0	0	1	0	0	0	0	0
Parolsenella	0	0	0	0	1	0	0	0	0	0
Parvibium	0	0	0	0	1	0	0	0	0	0
Patulibacter	0	0	0	0	1	1	0	0	0	0
Paucimonas	0	0	0	0	1	0	0	0	0	0
Paucisalibacillus	0	0	0	0	1	0	0	0	0	0
Pectobacterium	0	0	0	0	1	0	0	0	0	0
Pedosphaera	0	0	0	0	1	0	0	0	0	0
Pelagibaca	0	0	0	0	1	0	0	0	0	0
Pelagibacterium	0	0	0	0	1	0	0	0	0	0
Pelistega	0	0	0	0	1	0	0	0	0	0
Pelobacter	0	0	0	0	1	0	0	0	0	0
Pelobium	0	0	0	0	1	0	0	0	0	0
Pelodictyon	0	0	0	0	1	0	0	0	0	0
Pelolinea	0	0	0	0	1	0	0	0	0	0
Peptidiphaga	0	0	0	0	1	0	0	0	0	0
Peptoanaerobacter	0	0	0	0	1	0	0	0	0	0
Peptoclostridium	0	0	0	0	1	0	0	0	0	0
Perlucidibaca	0	0	0	0	1	0	0	0	0	0
Permianibacter	0	0	0	0	1	0	0	0	0	0
Persephonella	0	0	0	0	1	0	0	0	0	0
Persicobacter	0	0	0	0	1	0	0	0	0	0
Petrimonas	0	0	0	0	1	0	0	0	0	0
Petrocella	0	0	0	0	1	0	0	0	0	0
Petroclostridium	0	0	0	0	1	0	0	0	0	0
Phaeobacter	0	0	0	0	1	0	0	0	0	0
Phaeospirillum	0	0	0	0	1	0	0	0	0	0
Phaseolibacter	0	0	0	0	1	0	0	0	0	0
Phoenicibacter	0	0	0	0	1	0	0	0	0	0
Phormidesmis	0	0	0	0	1	0	0	0	0	0
Phormidium	0	0	0	0	1	0	0	0	0	0
Photorhabdus	0	0	0	0	1	0	0	0	0	0
Phragmitibacter	0	0	0	0	1	0	0	0	0	0
Phycicoccus	0	0	0	0	1	0	0	0	0	0
Phycisphaera	0	0	0	0	1	0	0	1	0	0
Phytobacter	0	0	0	0	1	0	0	0	0	0
Pilibacter	0	0	0	0	1	0	0	0	0	0
Piscirickettsia	0	0	0	0	1	0	0	0	0	0
Planctomicrobium	0	0	0	0	1	0	0	0	0	0
Planctomyces	0	0	0	0	1	0	0	0	0	0
Planctopirus	0	0	0	0	1	0	0	0	0	0
Planifilum	0	0	0	0	1	0	0	0	0	0
Planktomarina	0	0	0	0	1	0	0	0	0	0
Planktotalea	0	0	0	0	1	0	0	0	0	0
Planktothricoides	0	0	0	0	1	0	0	0	0	0
Planktothrix	0	0	0	0	1	0	0	0	0	0
Planobispora	0	0	0	0	1	0	0	0	0	0
Planococcus	0	0	0	0	1	0	0	0	0	0
Planomicrobium	0	0	0	0	1	0	0	0	0	0
Planomonospora	0	0	0	0	1	0	0	0	0	0
Plantactinospora	0	0	0	0	1	0	0	0	0	0
Plantibacter	0	0	0	0	1	0	0	1	0	0
Plasticicumulans	0	0	0	0	1	0	0	0	0	0
Pleionea	0	0	0	0	1	0	0	0	0	0
Pleomorphomonas	0	0	0	0	1	0	0	0	0	0
Pleurocapsa	0	0	0	0	1	1	0	0	0	0
Pluralibacter	0	0	0	0	1	0	0	0	0	0
Pokkaliibacter	0	0	0	0	1	0	0	0	0	0
Polyangium	0	0	0	0	1	0	0	1	0	0
Polymorphobacter	0	0	0	0	1	0	0	0	0	0
Polymorphum	0	0	0	0	1	0	0	0	0	0
Pontibaca	0	0	0	0	1	0	0	0	0	0
Pontibacillus	0	0	0	0	1	0	0	0	0	0
Ponticaulis	0	0	0	0	1	0	0	0	0	0
Ponticoccus	0	0	0	0	1	0	0	0	0	0
Porticoccus	0	0	0	0	1	0	0	0	0	0
Pragia	0	0	0	0	1	0	0	0	0	0
Prauserella	0	0	0	0	1	0	0	0	0	0
Prevotellamassilia	0	0	0	0	1	0	0	0	0	0
Prochlorococcus	0	0	0	0	1	0	0	0	0	0
Prolixibacter	0	0	0	0	1	0	0	0	0	0
Propionispira	0	0	0	0	1	0	0	0	0	0
Propionivibrio	0	0	0	0	1	0	0	0	0	0
Prosthecomicrobium	0	0	0	0	1	0	0	0	0	0
Protaetiibacter	0	0	0	0	1	0	0	1	0	0
Proteiniborus	0	0	0	0	1	0	0	0	0	0
Proteiniphilum	0	0	0	0	1	0	0	0	0	0
Proteus	0	0	0	0	1	0	0	0	0	0
Providencia	0	0	0	0	1	0	0	0	0	0
Pseudanabaena	0	0	0	0	1	0	0	0	0	0
Pseudarcicella	0	0	0	0	1	0	0	0	0	0
Pseudescherichia	0	0	0	0	1	0	0	0	0	0
Pseudoarcobacter	0	0	0	0	1	0	0	0	0	0
Pseudobacter	0	0	0	0	1	0	0	1	0	0
Pseudobacteriovorax	0	0	0	0	1	0	0	0	0	0
Pseudobacteroides	0	0	0	0	1	0	0	0	0	0
Pseudochrobactrum	0	0	0	0	1	0	0	0	0	0
Pseudodesulfovibrio	0	0	0	0	1	0	0	0	0	0
Pseudoflavonifractor	0	0	0	0	1	0	0	0	0	0
Pseudofulvimonas	0	0	0	0	1	0	0	0	0	0
Pseudogracilibacillus	0	0	0	0	1	0	0	0	0	0
Pseudogulbenkiania	0	0	0	0	1	0	0	0	0	0
Pseudohoeflea	0	0	0	0	1	0	0	0	0	0
Pseudolabrys	0	0	0	0	1	0	0	0	0	0
Pseudooceanicola	0	0	0	0	1	0	0	0	0	0
Pseudopropionibacterium	0	0	0	0	1	0	0	0	0	0
Pseudopuniceibacterium	0	0	0	0	1	0	0	0	0	0
Pseudorhizobium	0	0	0	0	1	0	0	0	0	0
Pseudorhodobacter	0	0	0	0	1	0	0	0	0	0
Pseudorivibacter	0	0	0	0	1	0	0	0	0	0
Pseudoruegeria	0	0	0	0	1	0	0	0	0	0
Pseudosporangium	0	0	0	0	1	0	0	0	0	0
Pseudothermotoga	0	0	0	0	1	0	0	0	0	0
Pseudovibrio	0	0	0	0	1	1	0	0	0	0
Psychrobacillus	0	0	0	0	1	0	0	0	0	0
Psychromicrobium	0	0	0	0	1	0	0	1	0	0
Psychroserpens	0	0	0	0	1	0	0	0	0	0
Puniceibacterium	0	0	0	0	1	0	0	0	0	0
Puteibacter	0	0	0	0	1	0	0	0	0	0
Pyrinomonas	0	0	0	0	1	0	0	0	0	0
Quadrisphaera	0	0	0	0	1	0	0	0	0	0
Quasibacillus	0	0	0	0	1	0	0	0	0	0
Raineya	0	0	0	0	1	0	0	0	0	0
Raoultella	0	0	0	0	1	0	0	0	0	0
Raoultibacter	0	0	0	0	1	0	0	0	0	0
Rariglobus	0	0	0	0	1	0	0	0	0	0
Reichenbachiella	0	0	0	0	1	0	0	0	0	0
Reinekea	0	0	0	0	1	0	0	0	0	0
Renibacterium	0	0	0	0	1	0	0	0	0	0
Rhizomicrobium	0	0	0	0	1	0	0	0	0	0
Rhizorhabdus	0	0	0	0	1	0	0	0	0	0
Rhodobium	0	0	0	0	1	0	0	0	0	0
Rhodoblastus	0	0	0	0	1	0	0	0	0	0
Rhodoglobus	0	0	0	0	1	0	0	0	0	0
Rhodoligotrophos	0	0	0	0	1	0	0	0	0	0
Rhodomicrobium	0	0	0	0	1	0	0	0	0	0
Rhodonellum	0	0	0	0	1	0	0	0	0	0
Rhodopila	0	0	0	0	1	0	0	0	0	0
Rhodoplanes	0	0	0	0	1	0	0	1	0	0
Rhodothalassium	0	0	0	0	1	0	0	0	0	0
Rhodovarius	0	0	0	0	1	0	0	0	0	0
Rhodovulum	0	0	0	0	1	0	0	0	0	0
Rickettsia	0	0	0	0	1	0	0	0	0	0
Rickettsiella	0	0	0	0	1	0	0	0	0	0
Risungbinella	0	0	0	0	1	0	0	0	0	0
Rivicola	0	0	0	0	1	0	0	0	0	0
Rivularia	0	0	0	0	1	0	0	0	0	0
Robbsia	0	0	0	0	1	0	0	0	0	0
Robertkochia	0	0	0	0	1	0	0	0	0	0
Robiginitalea	0	0	0	0	1	0	0	0	0	0
Robiginitomaculum	0	0	0	0	1	0	0	1	0	0
Romboutsia	0	0	0	0	1	0	0	0	0	0
Roseiarcus	0	0	0	0	1	0	0	0	0	0
Roseibaca	0	0	0	0	1	0	0	0	0	0
Roseibium	0	0	0	0	1	0	0	0	0	0
Roseicella	0	0	0	0	1	0	0	0	0	0
Roseicitreum	0	0	0	0	1	0	0	0	0	0
Roseiflexus	0	0	0	0	1	0	0	0	0	0
Roseimaritima	0	0	0	0	1	0	0	0	0	0
Roseimicrobium	0	0	0	0	1	0	0	0	0	0
Roseitalea	0	0	0	0	1	0	0	0	0	0
Roseivirga	0	0	0	0	1	0	0	0	0	0
Roseivivax	0	0	0	0	1	0	0	0	0	0
Roseobacter	0	0	0	0	1	0	0	0	0	0
Roseofilum	0	0	0	0	1	0	0	0	0	0
Roseovarius	0	0	0	0	1	0	0	0	0	0
Rouxiella	0	0	0	0	1	0	0	0	0	0
Rubeoparvulum	0	0	0	0	1	0	0	0	0	0
Rubidibacter	0	0	0	0	1	0	0	0	0	0
Rubinisphaera	0	0	0	0	1	0	0	0	0	0
Rubrimonas	0	0	0	0	1	0	0	0	0	0
Rubripirellula	0	0	0	0	1	0	0	0	0	0
Rubritalea	0	0	0	0	1	0	0	0	0	0
Rubrobacter	0	0	0	0	1	0	0	0	0	0
Rudaea	0	0	0	0	1	0	0	0	0	0
Rudaeicoccus	0	0	0	0	1	0	0	0	0	0
Rudanella	0	0	0	0	1	0	0	0	0	0
Rugamonas	0	0	0	0	1	0	0	0	0	0
Rugosibacter	0	0	0	0	1	0	0	0	0	0
Ruminiclostridium	0	0	0	0	1	0	0	0	0	0
Ruminobacter	0	0	0	0	1	0	0	0	0	0
Ruthenibacterium	0	0	0	0	1	0	0	0	0	0
Saccharibacillus	0	0	0	0	1	0	0	0	0	0
Saccharicrinis	0	0	0	0	1	0	0	0	0	0
Saccharomonospora	0	0	0	0	1	0	0	0	0	0
Saccharophagus	0	0	0	0	1	0	0	0	0	0
Saccharospirillum	0	0	0	0	1	0	0	0	0	0
Saezia	0	0	0	0	1	0	0	0	0	0
Sagittula	0	0	0	0	1	0	0	0	0	0
Salegentibacter	0	0	0	0	1	0	0	0	0	0
Salibacterium	0	0	0	0	1	0	0	0	0	0
Salicibibacter	0	0	0	0	1	0	0	0	0	0
Salinibius	0	0	0	0	1	0	0	0	0	0
Salinihabitans	0	0	0	0	1	0	0	0	0	0
Salinimicrobium	0	0	0	0	1	0	0	0	0	0
Salinimonas	0	0	0	0	1	0	0	0	0	0
Salinisphaera	0	0	0	0	1	0	0	0	0	0
Salinivenus	0	0	0	0	1	0	0	0	0	0
Salinivirga	0	0	0	0	1	0	0	0	0	0
Salsuginibacillus	0	0	0	0	1	1	0	0	0	0
Sandaracinus	0	0	0	0	1	0	0	0	0	0
Saprospira	0	0	0	0	1	0	0	0	0	0
Scardovia	0	0	0	0	1	0	0	0	0	0
Schaedlerella	0	0	0	0	1	0	0	0	0	0
Schlegelella	0	0	0	0	1	0	0	0	0	0
Schleiferia	0	0	0	0	1	0	0	0	0	0
Schumannella	0	0	0	0	1	0	0	1	0	0
Sebaldella	0	0	0	0	1	0	0	0	0	0
Sedimentibacter	0	0	0	0	1	0	0	0	0	0
Sedimenticola	0	0	0	0	1	0	0	0	0	0
Sedimentisphaera	0	0	0	0	1	0	0	0	0	0
Sediminibacter	0	0	0	0	1	0	0	0	0	0
Sediminicola	0	0	0	0	1	0	0	0	0	0
Sediminispirochaeta	0	0	0	0	1	0	0	0	0	0
Sediminitomix	0	0	0	0	1	0	0	0	0	0
Sellimonas	0	0	0	0	1	0	0	0	0	0
Serinibacter	0	0	0	0	1	0	0	0	0	0
Sharpea	0	0	0	0	1	0	0	0	0	0
Shigella	0	0	0	0	1	0	0	0	0	0
Shimazuella	0	0	0	0	1	0	0	0	0	0
Shimia	0	0	0	0	1	0	0	0	0	0
Siansivirga	0	0	0	0	1	0	0	0	0	0
Siccibacter	0	0	0	0	1	0	0	0	0	0
Siculibacillus	0	0	0	0	1	0	0	0	0	0
Sideroxydans	0	0	0	0	1	0	0	0	0	0
Silvanigrella	0	0	0	0	1	0	0	0	0	0
Silvibacterium	0	0	0	0	1	0	0	0	0	0
Simkania	0	0	0	0	1	0	0	0	0	0
Simplicispira	0	0	0	0	1	0	0	0	0	0
Sinimarinibacterium	0	0	0	0	1	0	0	0	0	0
Sinomonas	0	0	0	0	1	0	0	1	0	0
Siphonobacter	0	0	0	0	1	0	0	0	0	0
Skermania	0	0	0	0	1	0	0	0	0	0
Smaragdicoccus	0	0	0	0	1	0	0	0	0	0
Smithella	0	0	0	0	1	0	0	0	0	0
Sneathia	0	0	0	0	1	0	0	0	0	0
Snodgrassella	0	0	0	0	1	0	0	0	0	0
Sodalis	0	0	0	0	1	0	0	0	0	0
Solimonas	0	0	0	0	1	0	0	0	0	0
Solirubrum	0	0	0	0	1	0	0	0	0	0
Solitalea	0	0	0	0	1	0	0	0	0	0
Sorangium	0	0	0	0	1	0	0	0	0	0
Sphaerotilus	0	0	0	0	1	0	0	0	0	0
Spiribacter	0	0	0	0	1	0	0	0	0	0
Spirobacillus	0	0	0	0	1	0	0	0	0	0
Spirochaeta	0	0	0	0	1	0	0	0	0	0
Spiroplasma	0	0	0	0	1	0	0	0	0	0
Spirulina	0	0	0	0	1	0	0	0	0	0
Spongiibacter	0	0	0	0	1	0	0	0	0	0
Sporichthya	0	0	0	0	1	0	0	0	0	0
Sporocytophaga	0	0	0	0	1	0	0	0	0	0
Stakelama	0	0	0	0	1	0	0	0	0	0
Stanieria	0	0	0	0	1	0	0	0	0	0
Stappia	0	0	0	0	1	0	0	0	0	0
Stella	0	0	0	0	1	0	0	0	0	0
Stenotrophobium	0	0	0	0	1	0	0	0	0	0
Streptobacillus	0	0	0	0	1	0	0	0	0	0
Streptohalobacillus	0	0	0	0	1	0	0	0	0	0
Streptosporangium	0	0	0	0	1	0	0	0	0	0
Subdoligranulum	0	0	0	0	1	0	0	0	0	0
Succinivibrio	0	0	0	0	1	0	0	0	0	0
Sulfobacillus	0	0	0	0	1	0	0	1	0	0
Sulfuricella	0	0	0	0	1	0	0	0	0	0
Sulfuricurvum	0	0	0	0	1	0	0	0	0	0
Sulfuriflexus	0	0	0	0	1	0	0	0	0	0
Sulfurihydrogenibium	0	0	0	0	1	0	0	0	0	0
Sulfurimonas	0	0	0	0	1	0	0	0	0	0
Sulfuritalea	0	0	0	0	1	0	0	0	0	0
Sulfuritortus	0	0	0	0	1	0	0	0	0	0
Sulfurivermis	0	0	0	0	1	0	0	0	0	0
Sulfurovum	0	0	0	0	1	0	0	0	0	0
Sunxiuqinia	0	0	0	0	1	0	0	0	0	0
Sutterella	0	0	0	0	1	0	0	0	0	0
Suttonella	0	0	0	0	1	0	0	0	0	0
Swaminathania	0	0	0	0	1	0	0	0	0	0
Synechocystis	0	0	0	0	1	0	0	0	0	0
Syntrophaceticus	0	0	0	0	1	0	0	0	0	0
Syntrophobacter	0	0	0	0	1	0	0	0	0	0
Syntrophobotulus	0	0	0	0	1	0	0	0	0	0
Syntrophomonas	0	0	0	0	1	0	0	0	0	0
Syntrophus	0	0	0	0	1	0	0	0	0	0
Tahibacter	0	0	0	0	1	0	0	1	0	0
Taibaiella	0	0	0	0	1	0	0	0	0	0
Tamilnaduibacter	0	0	0	0	1	0	0	0	0	0
Tangfeifania	0	0	0	0	1	0	0	0	0	0
Tannerella	0	0	0	0	1	0	0	0	0	0
Tardibacter	0	0	0	0	1	0	0	0	0	0
Tatlockia	0	0	0	0	1	0	0	0	0	0
Tatumella	0	0	0	0	1	0	0	0	0	0
Tautonia	0	0	0	0	1	0	0	0	0	0
Taylorella	0	0	0	0	1	0	0	0	0	0
Telmatospirillum	0	0	0	0	1	0	0	0	0	0
Tenacibaculum	0	0	0	0	1	0	0	0	0	0
Tengunoibacter	0	0	0	0	1	0	0	0	0	0
Tepidanaerobacter	0	0	0	0	1	0	0	0	0	0
Tepidibacter	0	0	0	0	1	0	0	0	0	0
Tepidimicrobium	0	0	0	0	1	0	0	0	0	0
Terasakiella	0	0	0	0	1	0	0	0	0	0
Teredinibacter	0	0	0	0	1	0	0	0	0	0
Terrabacter	0	0	0	0	1	0	0	0	0	0
Terracidiphilus	0	0	0	0	1	0	0	0	0	0
Terribacillus	0	0	0	0	1	0	0	0	0	0
Terriglobus	0	0	0	0	1	0	0	0	0	0
Terrimicrobium	0	0	0	0	1	0	0	0	0	0
Terrimonas	0	0	0	0	1	0	0	0	0	0
Tersicoccus	0	0	0	0	1	0	0	1	0	0
Thalassobacter	0	0	0	0	1	0	0	0	0	0
Thalassobaculum	0	0	0	0	1	0	0	0	0	0
Thalassobium	0	0	0	0	1	0	0	0	0	0
Thalassococcus	0	0	0	0	1	0	0	0	0	0
Thalassolituus	0	0	0	0	1	0	0	0	0	0
Thalassomonas	0	0	0	0	1	0	0	0	0	0
Thalassospira	0	0	0	0	1	0	0	0	0	0
Thauera	0	0	0	0	1	0	0	0	0	0
Thermacetogenium	0	0	0	0	1	0	0	0	0	0
Thermaerobacter	0	0	0	0	1	0	0	0	0	0
Thermanaeromonas	0	0	0	0	1	0	0	0	0	0
Thermanaerovibrio	0	0	0	0	1	0	0	0	0	0
Thermoactinomyces	0	0	0	0	1	0	0	0	0	0
Thermoanaerobacter	0	0	0	0	1	0	0	0	0	0
Thermoanaerobacterium	0	0	0	0	1	0	0	0	0	0
Thermoanaerosceptrum	0	0	0	0	1	0	0	0	0	0
Thermobifida	0	0	0	0	1	0	0	1	0	0
Thermoclostridium	0	0	0	0	1	0	0	0	0	0
Thermocrinis	0	0	0	0	1	0	0	0	0	0
Thermodesulfatator	0	0	0	0	1	0	0	0	0	0
Thermodesulfobacterium	0	0	0	0	1	0	0	0	0	0
Thermodesulfobium	0	0	0	0	1	0	0	0	0	0
Thermodesulforhabdus	0	0	0	0	1	0	0	0	0	0
Thermoflavimicrobium	0	0	0	0	1	0	0	0	0	0
Thermoflexibacter	0	0	0	0	1	0	0	0	0	0
Thermoflexus	0	0	0	0	1	0	0	0	0	0
Thermogemmatispora	0	0	0	0	1	0	0	0	0	0
Thermoleophilum	0	0	0	0	1	0	0	0	0	0
Thermomonas	0	0	0	0	1	0	0	0	0	0
Thermonema	0	0	0	0	1	0	0	0	0	0
Thermopetrobacter	0	0	0	0	1	0	0	0	0	0
Thermophagus	0	0	0	0	1	0	0	0	0	0
Thermorudis	0	0	0	0	1	0	0	0	0	0
Thermosipho	0	0	0	0	1	0	0	0	0	0
Thermosporothrix	0	0	0	0	1	0	0	0	0	0
Thermostaphylospora	0	0	0	0	1	0	0	0	0	0
Thermovibrio	0	0	0	0	1	0	0	0	0	0
Thioalbus	0	0	0	0	1	0	0	0	0	0
Thioalkalivibrio	0	0	0	0	1	0	0	0	0	0
Thiobacillus	0	0	0	0	1	0	0	0	0	0
Thiocystis	0	0	0	0	1	0	0	0	0	0
Thiodictyon	0	0	0	0	1	0	0	0	0	0
Thiofilum	0	0	0	0	1	0	0	0	0	0
Thioflavicoccus	0	0	0	0	1	0	0	0	0	0
Thiohalobacter	0	0	0	0	1	0	0	0	0	0
Thiohalocapsa	0	0	0	0	1	0	0	0	0	0
Thiolinea	0	0	0	0	1	0	0	0	0	0
Thiomargarita	0	0	0	0	1	0	0	0	0	0
Thiomicrorhabdus	0	0	0	0	1	0	0	0	0	0
Thiomicrospira	0	0	0	0	1	0	0	0	0	0
Thiomonas	0	0	0	0	1	0	0	0	0	0
Thioploca	0	0	0	0	1	0	0	0	0	0
Thiovulum	0	0	0	0	1	0	0	0	0	0
Tibeticola	0	0	0	0	1	0	0	0	0	0
Tissierella	0	0	0	0	1	0	0	0	0	0
Tistlia	0	0	0	0	1	0	0	0	0	0
Tistrella	0	0	0	0	1	0	0	0	0	0
Tolypothrix	0	0	0	0	1	0	0	0	0	0
Trabulsiella	0	0	0	0	1	0	0	0	0	0
Tranquillimonas	0	0	0	0	1	0	0	0	0	0
Treponema	0	0	0	0	1	1	0	0	0	0
Trichococcus	0	0	0	0	1	0	0	1	0	0
Trichodesmium	0	0	0	0	1	0	0	0	0	0
Trichormus	0	0	0	0	1	0	0	0	0	0
Trinickia	0	0	0	0	1	0	0	0	0	0
Tritonibacter	0	0	0	0	1	0	0	0	0	0
Tropicibacter	0	0	0	0	1	0	0	0	0	0
Tropicimonas	0	0	0	0	1	0	0	0	0	0
Trueperella	0	0	0	0	1	0	0	0	0	0
Tuberibacillus	0	0	0	0	1	0	0	0	0	0
Tumebacillus	0	0	0	0	1	0	0	0	0	0
Turicibacter	0	0	0	0	1	0	0	0	0	0
Turneriella	0	0	0	0	1	1	0	0	0	0
Tychonema	0	0	0	0	1	0	0	0	0	0
Umezawaea	0	0	0	0	1	0	0	0	0	0
Undibacterium	0	0	0	0	1	0	0	0	0	0
Ureibacillus	0	0	0	0	1	0	0	0	0	0
Uruburuella	0	0	0	0	1	0	0	0	0	0
Vaginella	0	0	0	0	1	0	0	0	0	0
Vagococcus	0	0	0	0	1	0	0	0	0	0
Vallitalea	0	0	0	0	1	0	0	0	0	0
Vampirococcus	0	0	0	0	1	0	0	0	0	0
Verminephrobacter	0	0	0	0	1	0	0	0	0	0
Verrucomicrobium	0	0	0	0	1	0	0	0	0	0
Verrucosispora	0	0	0	0	1	0	0	0	0	0
Vicingus	0	0	0	0	1	0	0	0	0	0
Victivallis	0	0	0	0	1	0	0	0	0	0
Viridibacillus	0	0	0	0	1	0	0	0	0	0
Vitiosangium	0	0	0	0	1	0	0	1	0	0
Volucribacter	0	0	0	0	1	0	0	0	0	0
Waddlia	0	0	0	0	1	0	0	0	0	0
Weeksella	0	0	0	0	1	0	0	0	0	0
Wenzhouxiangella	0	0	0	0	1	0	0	0	0	0
Woeseia	0	0	0	0	1	0	0	0	0	0
Wohlfahrtiimonas	0	0	0	0	1	0	0	0	0	0
Wolbachia	0	0	0	0	1	0	0	0	0	1
Xanthomarina	0	0	0	0	1	0	0	0	0	0
Xenococcus	0	0	0	0	1	0	0	0	0	0
Xenorhabdus	0	0	0	0	1	0	0	0	0	0
Xylella	0	0	0	0	1	0	0	0	0	0
Yangia	0	0	0	0	1	0	0	0	0	0
Yersinia	0	0	0	0	1	0	0	0	0	0
Yimella	0	0	0	0	1	0	0	0	0	0
Yoonia	0	0	0	0	1	0	0	0	0	0
Youhaiella	0	0	0	0	1	0	0	0	0	0
Zavarzinia	0	0	0	0	1	0	0	0	0	0
Zhengella	0	0	0	0	1	0	0	0	0	0
Zhihengliuella	0	0	0	0	1	0	0	0	0	0
Zobellia	0	0	0	0	1	0	0	0	0	0
Zooshikella	0	0	0	0	1	0	0	0	0	0
Zunongwangia	0	0	0	0	1	0	0	0	0	0
Zymobacter	0	0	0	0	1	0	0	0	0	0
Aminomonas	0	0	0	0	0	1	0	0	0	0
Lagierella	0	0	0	0	0	1	0	0	0	0
Actinospica	0	0	0	0	0	0	0	1	0	0
Angustibacter	0	0	0	0	0	0	0	1	0	0
Aquisalimonas	0	0	0	0	0	0	0	1	0	0
Auritidibacter	0	0	0	0	0	0	0	1	0	0
Diaminobutyricimonas	0	0	0	0	0	0	0	1	0	0
Ekhidna	0	0	0	0	0	0	0	1	0	0
Homoserinibacter	0	0	0	0	0	0	0	1	0	0
Labedella	0	0	0	0	0	0	0	1	0	0
Lunatimonas	0	0	0	0	0	0	0	1	0	0
Luteimicrobium	0	0	0	0	0	0	0	1	0	0
Luteococcus	0	0	0	0	0	0	0	1	0	0
Lutibaculum	0	0	0	0	0	0	0	1	0	0
Myceligenerans	0	0	0	0	0	0	0	1	0	0
Paeniglutamicibacter	0	0	0	0	0	0	0	1	0	0
Parascardovia	0	0	0	0	0	0	0	1	0	0
Phytoactinopolyspora	0	0	0	0	0	0	0	1	0	0
Propionicicella	0	0	0	0	0	0	0	1	0	0
Propionicimonas	0	0	0	0	0	0	0	1	0	0
Pseudohaliea	0	0	0	0	0	0	0	1	0	0
Pseudoscardovia	0	0	0	0	0	0	0	1	0	0
Rarobacter	0	0	0	0	0	0	0	1	0	0
Sinobacterium	0	0	0	0	0	0	0	1	0	0
Tepidibacillus	0	0	0	0	0	0	0	1	0	0
Timonella	0	0	0	0	0	0	0	1	0	0
Tomitella	0	0	0	0	0	0	0	1	0	0
Yonghaparkia	0	0	0	0	0	0	0	1	0	0
Thalassobius	0	0	0	0	0	0	0	0	0	1

## Sheet: DarkAll_vs_ALL_upset_Bact_speci
ID	OurStudyALSblood	Linsley2014	Gagliardi2018	Brohawn2016	Ladd2017	Brohawn2019	Emanuel2020	Shin2014	Humphrys2016	VonSchack2018
Abiotrophia defectiva	1	0	0	0	1	0	0	0	0	0
Abiotrophia sp. HMSC24B09	1	0	0	0	0	0	0	0	0	0
Acetobacter oeni	1	0	0	0	1	0	0	0	0	0
Acetobacteraceae bacterium	1	0	1	0	0	0	0	0	0	0
Acholeplasma equifetale	1	0	0	0	0	0	0	0	0	0
Achromobacter denitrificans	1	0	0	0	1	0	0	0	0	0
Achromobacter dolens	1	0	0	0	1	0	0	0	0	0
Achromobacter insolitus	1	0	0	0	1	0	0	0	0	0
Achromobacter insuavis	1	0	0	0	1	0	0	0	0	0
Achromobacter ruhlandii	1	0	0	0	1	0	0	0	0	0
Achromobacter sp. 2789STDY5608607	1	0	0	0	0	0	0	0	0	0
Achromobacter sp. 2789STDY5608615	1	0	0	0	0	0	0	0	0	0
Achromobacter sp. 2789STDY5608621	1	0	0	0	0	0	0	0	0	0
Achromobacter sp. 2789STDY5608625	1	0	0	0	0	0	0	0	0	0
Achromobacter sp. 2789STDY5608628	1	0	0	0	0	0	0	0	0	0
Achromobacter sp. 2789STDY5608633	1	0	0	0	1	0	0	0	0	0
Achromobacter sp. DH1f	1	0	0	0	1	0	0	0	0	0
Achromobacter sp. K91	1	0	0	0	1	0	0	0	0	0
Achromobacter veterisilvae	1	0	0	0	1	0	0	0	0	0
Achromobacter xylosoxidans	1	0	1	0	1	0	0	0	0	0
Acidimicrobiaceae bacterium	1	0	1	0	1	0	0	0	0	0
Acidithiobacillus caldus	1	0	0	0	1	0	0	0	0	0
Acidobacteria bacterium	1	0	1	0	1	1	0	1	0	0
Acidobacteria bacterium Mor1	1	0	0	0	1	0	0	0	0	0
Acidobacteria bacterium RIFCSPLOWO2_02_FULL_67_36	1	0	0	0	0	0	0	0	0	0
Acidobacteriaceae bacterium URHE0068	1	0	0	0	1	0	0	0	0	0
Acidovorax sp. 35-64-16	1	0	0	0	0	0	0	0	0	0
Acidovorax sp. HMWF029	1	0	0	0	0	0	0	0	0	0
Acidovorax sp. MR-S7	1	0	0	0	1	0	0	0	0	0
Acidovorax temperans	1	0	0	0	1	0	0	0	0	0
Acidovorax wautersii	1	0	0	0	1	0	0	0	0	0
Acinetobacter apis	1	0	0	0	0	0	0	0	0	0
Acinetobacter baumannii	1	0	1	0	1	1	0	1	0	1
Acinetobacter cumulans	1	0	0	0	1	0	0	0	0	0
Acinetobacter johnsonii	1	0	1	0	1	0	0	0	0	0
Acinetobacter pittii	1	0	0	0	1	1	0	0	0	0
Acinetobacter sp. 21871	1	0	0	0	0	0	0	0	0	0
Acinetobacter sp. 3664	1	0	0	0	0	0	0	0	0	0
Acinetobacter sp. CFCC 10889	1	0	0	0	1	0	0	0	0	0
Acinetobacter sp. CIP 102129	1	0	0	0	0	0	0	0	0	0
Acinetobacter sp. LoGeW2-3	1	0	0	0	0	0	0	0	0	0
Acinetobacter sp. WCHAc010052	1	0	0	0	1	0	0	0	0	0
Acinetobacter sp. WCHAc060012	1	0	0	0	1	0	0	0	0	0
Acinetobacter variabilis	1	0	0	0	0	0	0	0	0	0
Acinetobacter venetianus	1	0	0	0	1	0	0	0	0	0
Actinoalloteichus fjordicus	1	0	0	0	0	0	0	0	0	0
Actinobacteria bacterium	1	0	1	0	1	0	0	0	0	0
Actinobacteria bacterium 13_1_20CM_4_69_9	1	0	0	0	0	0	0	0	0	0
Actinobacteria bacterium RBG_19FT_COMBO_70_19	1	0	0	0	0	0	0	0	0	0
Actinobaculum sp. oral taxon 183	1	0	0	0	0	0	0	0	0	0
Actinocorallia populi	1	0	0	0	0	0	0	0	0	0
Actinomadura sp. KC216	1	0	0	0	1	0	0	0	0	0
Actinomyces gerencseriae	1	0	1	0	0	0	0	0	0	0
Actinomyces graevenitzii	1	0	1	0	1	0	0	0	0	0
Actinomyces massiliensis	1	0	1	0	1	0	0	0	0	0
Actinomyces sp. HMSC065F12	1	0	0	0	0	0	0	0	0	0
Actinomyces urogenitalis	1	0	0	0	1	0	0	0	0	0
Actinomycetaceae bacterium BA112	1	0	0	0	0	0	0	0	0	0
Actinomycetales bacterium	1	0	0	0	1	0	0	0	0	0
Actinoplanes philippinensis	1	0	0	0	1	0	0	0	0	0
Actinoplanes utahensis	1	0	0	0	0	0	0	0	0	0
Advenella sp. S44	1	0	0	0	0	0	0	0	0	0
Aequorivita viscosa	1	0	0	0	0	0	0	0	0	0
Aerococcus christensenii	1	0	0	0	1	0	0	0	0	0
Aerococcus urinae	1	0	1	0	1	0	0	1	0	0
Aerococcus viridans	1	0	1	0	0	0	0	0	0	0
Aeromicrobium sp. PE09-221	1	0	0	0	1	0	0	0	0	0
Aeromonas enteropelogenes	1	0	0	0	0	0	0	0	0	0
Aeromonas schubertii	1	0	0	0	0	0	0	0	0	0
Aggregatibacter actinomycetemcomitans	1	0	0	0	0	0	0	0	0	0
Agreia sp. VKM Ac-1783	1	0	0	0	1	0	0	1	0	0
Agrobacterium tumefaciens	1	0	1	0	1	0	0	0	0	0
Algoriphagus ratkowskyi	1	0	0	0	0	0	0	0	0	0
Aliiroseovarius sediminilitoris	1	0	0	0	1	0	0	0	0	0
Alishewanella aestuarii	1	0	0	0	1	0	0	0	0	0
Alkalibacterium kapii	1	0	0	0	0	0	0	0	0	0
Alkanindiges illinoisensis	1	0	0	0	1	0	0	0	0	0
Allisonella histaminiformans	1	0	0	0	0	0	0	0	0	0
Alloactinosynnema iranicum	1	0	0	0	1	0	0	0	0	0
Alloprevotella sp.	1	0	1	0	1	0	0	0	0	0
Alloprevotella tannerae	1	0	0	0	0	0	0	0	0	0
Alphaproteobacteria bacterium	1	1	1	0	1	0	0	0	0	0
Alphaproteobacteria bacterium 64-6	1	0	0	0	0	0	0	0	0	0
Alphaproteobacteria bacterium PA3	1	0	0	0	1	0	0	0	0	0
Altererythrobacter sp. XM-24bin4	1	0	0	0	0	0	0	0	0	0
Alteromonadales bacterium TW-7	1	0	0	0	0	0	0	0	0	0
Amycolatopsis alkalitolerans	1	0	0	0	0	0	0	0	0	0
Amycolatopsis australiensis	1	0	0	0	1	0	0	0	0	0
Amycolatopsis nigrescens	1	0	0	0	0	0	0	0	0	0
Amycolatopsis niigatensis	1	0	0	0	1	0	0	0	0	0
Amycolatopsis sp. ATCC 39116	1	0	0	0	0	0	0	0	0	0
Amycolatopsis sp. GLM-1	1	0	0	0	0	0	0	0	0	0
Amycolatopsis thailandensis	1	0	0	0	1	0	0	0	0	0
Anabaena sp. WA113	1	0	0	0	1	0	0	0	0	0
Anaerococcus hydrogenalis	1	0	0	0	0	0	0	0	0	0
Anaerococcus marasmi	1	0	0	0	0	0	0	0	0	0
Anaerococcus nagyae	1	0	1	0	1	1	1	0	0	0
Anaerococcus octavius	1	0	0	0	0	0	0	0	0	0
Anaerococcus provencensis	1	0	0	0	0	0	0	0	0	0
Anaerolineaceae bacterium 4572_78	1	0	0	0	1	0	0	0	0	0
Anaerolineales bacterium	1	0	0	0	1	0	0	0	0	0
Anaerosphaera multitolerans	1	0	0	0	1	0	0	0	0	0
Anaerostipes caccae	1	0	0	0	0	0	0	0	0	0
Anaerovibrio lipolyticus	1	0	0	0	1	0	0	0	0	0
Andreprevotia chitinilytica	1	0	0	0	0	0	0	0	0	0
Angelakisella massiliensis	1	0	0	0	1	0	0	0	0	0
Aquimarina brevivitae	1	0	0	0	0	0	0	0	0	0
Aquitalea sp. MWU14-2217	1	0	0	0	0	0	0	0	0	0
Archangium gephyra	1	0	1	0	1	0	0	0	0	0
Arcobacter mytili	1	0	0	0	1	0	0	0	0	0
Arenibacter troitsensis	1	0	0	0	0	0	0	0	0	0
Aromatoleum aromaticum	1	0	0	0	1	0	0	0	0	0
Arsenicicoccus sp.	1	0	0	0	0	0	0	0	0	0
Arthrobacter cupressi	1	0	0	0	0	0	0	0	0	0
Arthrobacter sp. CAU 1506	1	0	0	0	0	0	0	0	0	0
Arthrobacter woluwensis	1	0	1	0	0	0	0	1	0	0
Atopobium deltae	1	0	0	0	0	0	0	0	0	0
Atopobium sp. Marseille-P4126	1	0	0	0	0	0	0	0	0	0
Atopobium vaginae	1	0	1	0	1	0	0	0	0	0
Aureimonas sp. AU4	1	0	0	0	0	0	0	0	0	0
Aureimonas sp. Leaf454	1	0	0	0	0	0	0	0	0	0
Austwickia chelonae	1	0	0	0	0	0	0	0	0	0
Azospirillum brasilense	1	0	1	0	1	0	0	0	0	0
Azospirillum lipoferum	1	0	0	0	1	0	0	0	0	0
Azospirillum thiophilum	1	0	0	0	0	0	0	0	0	0
Bacillus acanthi	1	0	0	0	1	0	0	0	0	0
Bacillus anthracis	1	0	0	0	1	0	0	0	0	0
Bacillus cereus	1	0	0	0	1	1	0	0	0	0
Bacillus dakarensis	1	0	0	0	0	0	0	0	0	0
Bacillus galactosidilyticus	1	0	0	0	0	0	0	0	0	0
Bacillus ginsengihumi	1	0	0	0	1	0	0	0	0	0
Bacillus marisflavi	1	0	0	0	1	0	0	0	0	0
Bacillus megaterium	1	0	0	0	1	0	0	0	0	0
Bacillus mycoides	1	0	0	0	1	0	0	0	0	0
Bacillus nanhaiisediminis	1	0	0	0	0	0	0	0	0	0
Bacillus paralicheniformis	1	0	0	0	0	0	0	0	0	0
Bacillus sp. DSL-17	1	0	0	0	0	0	0	0	0	0
Bacillus sp. E(2018)	1	0	0	0	0	0	0	0	0	0
Bacillus sp. FJAT-42315	1	0	0	0	0	0	0	0	0	0
Bacillus sp. S3	1	0	0	0	1	0	0	0	0	0
Bacillus thermoamylovorans	1	0	0	0	1	0	0	0	0	0
Bacillus thuringiensis	1	0	0	0	1	0	0	0	0	0
Bacillus tuaregi	1	0	0	0	0	0	0	0	0	0
Bacteroidales bacterium KA00251	1	0	0	0	0	0	0	0	0	0
Bacteroidales bacterium KA00344	1	0	0	0	0	0	0	0	0	0
Bacteroides fragilis	1	0	1	0	1	0	0	1	0	0
Bacteroides ovatus	1	0	0	0	1	0	0	0	0	0
Bacteroides pyogenes	1	0	0	0	0	0	0	0	0	0
Bacteroides sartorii	1	0	0	0	0	0	0	0	0	0
Bacteroides sp. 2_1_33B	1	0	0	0	1	0	0	0	0	0
Bacteroides sp. OM05-12	1	0	0	0	0	0	0	0	0	0
Bacteroides uniformis	1	0	1	0	1	0	0	0	0	0
Bacteroidetes bacterium	1	0	1	0	1	0	0	1	0	0
Bacteroidetes bacterium 37-13	1	0	0	0	1	0	0	0	0	0
Bacteroidetes bacterium GWF2_40_14	1	0	0	0	1	0	0	0	0	0
Bacteroidetes bacterium OLB11	1	0	0	0	1	0	0	0	0	0
Bacteroidia bacterium	1	0	0	0	1	0	0	0	0	0
Bathymodiolus azoricus thioautotrophic gill symbiont	1	0	0	0	1	0	0	0	0	0
Bdellovibrio bacteriovorus	1	0	0	0	1	0	1	0	0	0
Betaproteobacteria bacterium	1	0	0	0	1	0	0	1	0	0
Betaproteobacteria bacterium HGW-Betaproteobacteria-16	1	0	0	0	0	0	0	0	0	0
Betaproteobacteria bacterium HGW-Betaproteobacteria-9	1	0	0	0	0	0	0	0	0	0
Bifidobacteriaceae bacterium NR003	1	0	0	0	0	0	0	0	0	0
Bifidobacteriaceae bacterium NR015	1	0	0	0	1	0	0	0	0	0
Bifidobacteriaceae bacterium NR017	1	0	0	0	0	0	0	0	0	0
Bifidobacteriaceae bacterium NR019	1	0	0	0	0	0	0	0	0	0
Bifidobacteriaceae bacterium NR047	1	0	0	0	0	0	0	0	0	0
Bifidobacteriaceae bacterium VN003	1	0	0	0	0	0	0	0	0	0
Bifidobacteriaceae bacterium WP012	1	0	0	0	0	0	0	0	0	0
Bifidobacteriaceae bacterium WP022	1	0	0	0	0	0	0	0	0	0
Bifidobacterium animalis	1	0	0	0	1	0	0	0	0	0
Bifidobacterium commune	1	0	0	0	0	0	0	0	0	0
Bifidobacterium coryneforme	1	0	0	0	0	0	0	0	0	0
Bifidobacterium hapali	1	0	0	0	0	0	0	0	0	0
Bifidobacterium longum	1	0	0	0	1	0	0	1	0	0
Bifidobacterium pseudolongum	1	0	0	0	1	0	0	1	0	0
Bifidobacterium sp. 7101	1	0	0	0	0	0	0	0	0	0
Bizionia paragorgiae	1	0	0	0	1	0	0	0	0	0
Blastochloris viridis	1	0	0	0	1	0	0	0	0	0
Blastococcus litoris	1	0	0	0	0	0	0	0	0	0
Blastococcus sp. TF02-9	1	0	1	0	1	0	0	0	0	0
Blastococcus sp. TF02A-26	1	0	0	0	1	0	0	0	0	0
Bordetella bronchiseptica	1	0	0	0	1	0	0	0	0	0
Bordetella sp. SCN 68-11	1	0	0	0	0	0	0	0	0	0
Bosea sp. DSM 18164	1	0	0	0	0	0	0	0	0	0
Bosea sp. Root381	1	0	0	0	1	0	0	0	0	0
Brachybacterium faecium	1	0	0	0	0	0	0	0	0	0
Brachybacterium muris	1	0	0	0	0	0	0	1	0	0
Brachybacterium paraconglomeratum	1	0	0	0	0	0	0	0	0	0
Brachybacterium sp. AG952	1	0	0	0	0	0	0	0	0	0
Brachybacterium sp. sponge	1	0	0	0	0	0	0	0	0	0
Brachybacterium squillarum	1	0	0	0	1	0	0	0	0	0
Bradyrhizobium guangzhouense	1	0	0	0	0	0	0	0	0	0
Bradyrhizobium lablabi	1	0	0	0	1	0	0	0	0	0
Bradyrhizobium paxllaeri	1	0	0	0	1	0	0	0	0	0
Bradyrhizobium sp.	1	0	0	0	1	0	0	0	0	0
Bradyrhizobium sp. Ec3.3	1	0	0	0	0	0	0	0	0	0
Bradyrhizobium sp. MOS004	1	0	0	0	0	0	0	0	0	0
Bradyrhizobium sp. STM 3809	1	0	1	0	1	0	0	0	0	0
Bradyrhizobium sp. TSA1	1	0	0	0	0	0	0	0	0	0
Bradyrhizobium sp. aSej3	1	0	0	0	1	0	0	0	0	0
Bradyrhizobium viridifuturi	1	0	0	0	1	0	0	0	0	0
Bremerella volcania	1	0	0	0	1	0	0	0	0	0
Brevibacillus agri	1	0	0	0	0	0	0	0	0	0
Brevibacillus sp. WF146	1	0	0	0	0	0	0	0	0	0
Brevibacterium album	1	0	0	0	0	0	0	0	0	0
Brevibacterium aurantiacum	1	0	1	0	1	0	0	0	0	0
Brevibacterium sp. HMSC08F02	1	0	0	0	0	0	0	0	0	0
Brevibacterium sp. HMSC22B09	1	0	0	0	0	0	0	0	0	0
Brevundimonas diminuta	1	0	0	0	1	0	0	0	0	0
Brevundimonas sp.	1	0	1	0	1	0	0	0	0	0
Brevundimonas sp. AAP58	1	0	0	0	0	0	0	0	0	0
Brevundimonas subvibrioides	1	0	0	0	0	0	0	0	0	0
Burkholderia cepacia	1	0	1	0	1	0	0	0	0	0
Burkholderia multivorans	1	1	0	0	1	1	0	1	0	0
Burkholderia pseudomallei	1	0	0	0	1	0	0	0	0	0
Burkholderia sp. Bp9143	1	0	0	0	0	0	0	0	0	0
Burkholderia sp. H160	1	0	1	0	0	0	0	0	0	0
Burkholderia sp. K24	1	0	0	0	0	0	0	0	0	0
Burkholderia territorii	1	0	0	0	1	0	0	0	0	0
Burkholderia ubonensis	1	0	1	0	1	0	0	0	0	0
Burkholderia vietnamiensis	1	0	0	0	1	0	0	0	0	0
Burkholderiaceae bacterium	1	0	1	0	1	0	0	0	0	0
Burkholderiaceae bacterium 16	1	0	0	0	0	0	0	0	0	0
Burkholderiales bacterium	1	0	1	0	1	1	0	0	0	0
Burkholderiales bacterium RIFCSPHIGHO2_01_FULL_63_240	1	0	0	0	1	0	0	0	0	0
Butyrivibrio sp. AE3009	1	0	0	0	1	0	0	0	0	0
Butyrivibrio sp. MC2013	1	0	0	0	1	0	0	0	0	0
Butyrivibrio sp. WCD3002	1	0	0	0	0	0	0	0	0	0
Caballeronia jiangsuensis	1	0	0	0	1	0	0	0	0	0
Caedibacter sp. 38-128	1	0	0	0	1	0	0	0	0	0
Campylobacter showae	1	0	0	0	1	0	0	0	0	0
Campylobacter sputorum	1	0	0	0	1	0	0	0	0	0
Candidatus Accumulibacter sp. SK-11	1	0	0	0	1	0	0	0	0	0
Candidatus Beckwithbacteria bacterium GW2011_GWA1_46_30	1	0	0	0	1	0	0	0	0	0
Candidatus Berkiella aquae	1	0	0	0	1	0	0	0	0	0
Candidatus Collierbacteria bacterium GW2011_GWB2_42_12	1	0	0	0	1	0	0	0	0	0
Candidatus Dependentiae bacterium	1	0	0	0	1	0	0	0	0	0
Candidatus Fonsibacter ubiquis	1	0	0	0	0	0	0	0	0	0
Candidatus Gastranaerophilales bacterium HUM_8	1	0	0	0	0	0	0	0	0	0
Candidatus Jacksonbacteria bacterium RIFCSPLOWO2_02_FULL_43_9	1	0	0	0	0	0	0	0	0	0
Candidatus Kerfeldbacteria bacterium RIFCSPHIGHO2_12_FULL_42_13	1	0	0	0	0	0	0	0	0	0
Candidatus Liptonbacteria bacterium RIFCSPLOWO2_01_FULL_45_15	1	0	0	0	1	0	0	0	0	0
Candidatus Liptonbacteria bacterium RIFCSPLOWO2_12_FULL_60_15	1	0	0	0	0	0	0	0	0	0
Candidatus Magasanikbacteria bacterium RIFOXYC2_FULL_42_28	1	0	0	0	1	0	0	0	0	0
Candidatus Marinimicrobia bacterium MT.SAG.4	1	0	0	0	0	0	0	0	0	0
Candidatus Nealsonbacteria bacterium CG15_BIG_FIL_POST_REV_8_21_14_020_37_12	1	0	0	0	1	0	0	0	0	0
Candidatus Ornithobacterium hominis	1	0	0	0	1	0	0	0	0	0
Candidatus Parcubacteria bacterium	1	0	1	0	1	0	0	1	0	0
Candidatus Poribacteria bacterium	1	0	0	0	1	0	0	0	0	0
Candidatus Riflebacteria bacterium GWC2_50_8	1	0	0	0	0	0	0	0	0	0
Candidatus Rokubacteria bacterium	1	0	1	0	1	0	0	1	0	0
Candidatus Ryanbacteria bacterium RIFCSPLOWO2_01_FULL_48_26	1	0	0	0	1	0	0	0	0	0
Candidatus Saccharibacteria bacterium GW2011_GWC2_48_9	1	0	0	0	1	0	0	0	0	0
Candidatus Scalindua sp. SCAELEC01	1	0	0	0	1	0	0	0	0	0
Candidatus Schekmanbacteria bacterium RBG_16_38_10	1	0	0	0	1	0	0	0	0	0
Candidatus Shapirobacteria bacterium CG_4_9_14_3_um_filter_39_13	1	0	0	0	1	0	0	0	0	0
Candidatus Sungbacteria bacterium RIFCSPLOWO2_01_FULL_59_16	1	0	0	0	1	0	0	0	0	0
Candidatus Taylorbacteria bacterium RIFCSPHIGHO2_02_FULL_43_55	1	0	0	0	1	0	0	0	0	0
Candidatus Thermofonsia Clade 1 bacterium	1	0	0	0	0	0	0	0	0	0
Candidatus Viridilinea mediisalina	1	0	0	0	0	0	0	0	0	0
Candidatus Vogelbacteria bacterium CG10_big_fil_rev_8_21_14_0_10_45_14	1	0	0	0	1	0	0	0	0	0
Candidatus Yanofskybacteria bacterium RIFCSPHIGHO2_01_FULL_44_110b	1	0	0	0	0	0	0	0	0	0
Candidatus [Bacteroides] periocalifornicus	1	0	0	0	0	0	0	0	0	0
Cardiobacterium valvarum	1	0	0	0	0	0	0	0	0	0
Catenibacterium mitsuokai	1	1	0	0	1	0	0	0	0	0
Catenibacterium sp. co_0103	1	1	0	0	0	0	0	0	0	0
Catonella morbi	1	0	0	0	0	0	0	0	0	0
Catonella sp.	1	1	0	0	1	0	0	0	0	0
Caulobacter sp. K31	1	0	1	0	1	0	0	0	0	0
Caulobacter sp. URHA0033	1	0	0	0	0	0	0	0	0	0
Caulobacter vibrioides	1	0	1	0	1	0	0	0	0	0
Caulobacteraceae bacterium	1	0	0	0	0	0	0	0	0	0
Cellulomonas shaoxiangyii	1	0	0	0	0	0	0	0	0	0
Chitinophaga pinensis	1	0	0	0	1	0	0	0	0	0
Chitinophaga sp. OK723	1	0	0	0	1	0	0	0	0	0
Chitinophaga sp. T22	1	0	0	0	1	0	0	0	0	0
Chitinophagaceae bacterium	1	0	1	0	1	0	0	1	0	0
Chitinophagaceae bacterium IBVUCB2	1	0	0	0	1	0	0	0	0	0
Chlamydia abortus	1	0	0	0	1	0	0	0	0	0
Chlamydia psittaci	1	0	0	0	0	0	0	0	0	0
Chlamydia trachomatis	1	0	0	0	1	0	0	1	0	0
Chlamydiales bacterium 38-26	1	0	0	0	1	0	0	0	0	0
Chlorobi bacterium OLB7	1	0	0	0	1	0	0	0	0	0
Chlorobium sp. 445	1	0	0	0	1	0	0	0	0	0
Chloroflexi bacterium	1	0	1	0	1	0	0	0	0	0
Chromatocurvus halotolerans	1	0	0	0	0	0	0	0	0	0
Chromobacterium sphagni	1	0	0	0	1	0	0	0	0	0
Chroococcidiopsis cubana	1	0	0	0	0	0	0	0	0	0
Chryseobacterium cucumeris	1	0	1	0	0	0	0	0	0	0
Chryseobacterium lacus	1	0	0	0	0	0	0	1	0	0
Chryseobacterium sp. OV279	1	0	0	0	0	0	0	0	0	0
Chryseobacterium sp. SN22	1	0	0	0	1	0	0	0	0	0
Chryseobacterium sp. VAUSW3	1	0	0	0	0	0	0	0	0	0
Chryseobacterium sp. YR459	1	0	0	0	1	0	0	0	0	0
Chthoniobacter flavus	1	0	0	0	1	0	0	0	0	0
Citrobacter freundii	1	0	0	0	1	0	0	0	0	0
Citromicrobium sp.	1	0	0	0	1	0	0	0	0	0
Clostridia bacterium	1	0	0	0	1	0	0	0	0	0
Clostridiales bacterium	1	0	1	1	1	1	0	1	0	0
Clostridiales bacterium CHKCI001	1	0	0	0	0	0	0	0	0	0
Clostridiales bacterium COT073_COT-073	1	0	0	0	0	0	0	0	0	0
Clostridiales bacterium Marseille-P2986	1	0	0	0	0	0	0	0	0	0
Clostridioides difficile	1	0	1	0	1	0	0	0	0	0
Clostridium aceticum	1	0	0	0	0	0	0	0	0	0
Clostridium botulinum	1	0	1	0	1	0	0	0	0	0
Clostridium butyricum	1	0	0	0	1	0	0	0	0	0
Clostridium cadaveris	1	0	0	0	1	0	0	0	0	0
Clostridium grantii	1	0	0	0	0	0	0	0	0	0
Clostridium ljungdahlii	1	0	0	0	1	0	0	0	0	0
Clostridium sp. CAG:277	1	0	0	0	1	0	0	0	0	0
Cocleimonas flava	1	0	0	0	1	0	0	0	0	0
Cohnella sp. M2MS4P-1	1	0	0	0	1	0	0	0	0	0
Collimonas arenae	1	0	0	0	1	0	0	0	0	0
Collinsella sp. AF31-11	1	0	0	0	0	0	0	0	0	0
Collinsella stercoris	1	0	0	0	1	0	0	0	0	0
Comamonadaceae bacterium PBBC1	1	0	0	0	1	0	0	0	0	0
Comamonadaceae bacterium PBBC2	1	0	0	0	0	0	0	0	0	0
Comamonadaceae bacterium URHA0028	1	0	0	0	0	0	0	0	0	0
Comamonas sp. AG1104	1	0	0	0	0	0	0	0	0	0
Coprococcus comes	1	0	0	0	1	0	0	0	0	0
Corallococcus aberystwythensis	1	0	0	0	0	0	0	0	0	0
Coriobacteriales bacterium DNF00809	1	0	0	0	0	0	0	0	0	0
Corynebacterium accolens	1	0	0	0	0	0	0	1	0	0
Corynebacterium afermentans	1	0	0	0	0	0	0	0	0	0
Corynebacterium appendicis	1	0	1	0	1	0	0	0	0	0
Corynebacterium aurimucosum	1	0	0	0	0	0	0	1	0	0
Corynebacterium bouchesdurhonense	1	0	0	0	1	0	0	0	0	0
Corynebacterium dentalis	1	0	1	0	1	0	0	0	0	0
Corynebacterium durum	1	0	1	0	1	0	0	0	0	0
Corynebacterium fournierii	1	0	0	0	0	0	0	0	0	0
Corynebacterium genitalium	1	0	1	0	1	0	0	0	0	0
Corynebacterium glaucum	1	0	0	0	0	0	0	0	0	0
Corynebacterium glucuronolyticum	1	0	0	0	0	0	0	1	0	0
Corynebacterium hadale	1	0	0	0	0	0	0	0	0	0
Corynebacterium kefirresidentii	1	0	1	0	0	0	0	0	0	0
Corynebacterium kroppenstedtii	1	0	1	0	0	0	0	0	0	0
Corynebacterium macginleyi	1	0	0	0	0	0	0	0	0	0
Corynebacterium massiliense	1	0	0	0	0	0	0	0	0	0
Corynebacterium propinquum	1	0	0	0	1	0	0	1	0	0
Corynebacterium pseudogenitalium	1	0	0	0	0	1	0	0	0	0
Corynebacterium sp. HMSC034A01	1	0	0	0	0	0	0	0	0	0
Corynebacterium sp. HMSC034B08	1	0	0	0	0	0	0	0	0	0
Corynebacterium sp. HMSC055D05	1	0	0	0	0	0	0	0	0	0
Corynebacterium sp. HMSC05H05	1	0	0	0	0	0	0	0	0	0
Corynebacterium sp. HMSC064E10	1	0	0	0	0	0	0	0	0	0
Corynebacterium sp. HMSC06C06	1	0	0	0	0	0	0	0	0	0
Corynebacterium sp. HMSC070H05	1	0	0	0	0	0	0	0	0	0
Corynebacterium sp. HMSC071B10	1	0	0	0	0	0	0	0	0	0
Corynebacterium sp. HMSC11D10	1	0	0	0	0	0	0	0	0	0
Corynebacterium sp. KPL1860	1	0	0	0	0	0	0	0	0	0
Corynebacterium sp. KPL1996	1	0	0	0	0	0	0	0	0	0
Corynebacterium sp. NML 150383	1	0	0	0	0	0	0	0	0	0
Corynebacterium sp. NML180780	1	0	0	0	0	0	0	0	0	0
Corynebacterium sphenisci	1	0	0	0	0	0	0	0	0	0
Corynebacterium tuberculostearicum	1	0	1	0	1	0	0	0	0	0
Corynebacterium tuscaniense	1	0	0	0	0	0	0	0	0	0
Corynebacterium urealyticum	1	0	0	0	0	0	0	0	0	0
Corynebacterium urinapleomorphum	1	0	0	0	0	0	0	1	0	0
Crocinitomicaceae bacterium	1	0	0	0	1	0	0	0	0	0
Cronobacter turicensis	1	0	0	0	1	0	0	0	0	0
Cryobacterium sp. GCJ02	1	0	0	0	0	0	0	1	0	0
Cupriavidus oxalaticus	1	0	0	0	1	0	0	0	0	0
Cupriavidus taiwanensis	1	0	0	0	1	0	0	0	0	0
Curtobacterium luteum	1	0	0	0	0	0	0	1	0	0
Curtobacterium sp. MCBD17_021	1	0	0	0	0	0	0	0	0	0
Curtobacterium sp. ZW137	1	0	0	0	0	0	0	0	0	0
Curvibacter gracilis	1	0	1	0	1	0	0	0	0	0
Cutibacterium acnes	1	0	1	0	1	0	1	0	0	0
Cytophagaceae bacterium CAR-16	1	0	0	0	1	0	0	0	0	0
Defluviitalea phaphyphila	1	0	0	0	0	0	0	0	0	0
Deinococcus ficus	1	0	0	0	0	0	0	1	0	0
Deinococcus radiodurans	1	0	0	0	1	0	0	0	0	0
Deinococcus sp. K2S05-167	1	0	1	0	1	0	0	0	0	0
Delftia sp. ZNC0008	1	0	0	0	1	0	0	0	0	0
Deltaproteobacteria bacterium	1	1	1	0	1	0	0	1	0	0
Deltaproteobacteria bacterium RBG_13_43_22	1	0	0	0	1	0	0	0	0	0
Deltaproteobacteria bacterium RIFCSPHIGHO2_12_FULL_43_9	1	0	0	0	1	0	0	0	0	0
Dermacoccus nishinomiyaensis	1	0	0	0	1	0	0	1	0	0
Desulfobacteraceae bacterium 4572_89	1	0	0	0	0	0	0	0	0	0
Desulfocarbo indianensis	1	0	0	0	1	0	0	0	0	0
Desulfonatronovibrio magnus	1	0	0	0	0	0	0	0	0	0
Desulfonauticus sp. 38_4375	1	0	0	0	0	0	0	0	0	0
Desulfotalea psychrophila	1	0	0	0	0	0	0	0	0	0
Desulfovibrio sp. DS-1	1	0	0	0	0	0	0	0	0	0
Desulfovibrio sp. MES5	1	0	0	0	1	0	0	0	0	0
Desulfovibrionaceae bacterium	1	0	0	0	1	0	0	0	0	0
Devosia sp. 17-2-E-8	1	0	0	0	1	0	0	0	0	0
Devosia sp. Root413D1	1	0	0	0	0	0	0	0	0	0
Devosia sp. Root436	1	0	0	0	1	0	0	0	0	0
Devosia sp. YR412	1	0	0	0	0	0	0	0	0	0
Devosia submarina	1	0	0	0	0	0	0	0	0	0
Dialister micraerophilus	1	0	0	0	1	0	0	0	0	0
Dialister sp. CAG:357	1	0	0	0	0	0	0	0	0	0
Diaphorobacter sp. DS2	1	0	0	0	0	0	0	0	0	0
Diaphorobacter sp. LR2014-1	1	0	0	0	1	0	0	0	0	0
Dongia mobilis	1	0	0	0	1	0	0	0	0	0
Dysgonomonas mossii	1	0	0	0	1	0	0	0	0	0
Edaphobacillus lindanitolerans	1	0	0	0	1	0	0	0	0	0
Edaphobacter modestus	1	0	0	0	1	0	0	0	0	0
Elusimicrobia bacterium CG08_land_8_20_14_0_20_44_26	1	0	0	0	0	0	0	0	0	0
Elusimicrobia bacterium RIFOXYA12_FULL_51_18	1	0	0	0	0	0	0	0	0	0
Emticicia sp. TH156	1	0	1	0	1	0	0	0	0	0
Enterobacter hormaechei	1	0	0	0	1	0	0	0	0	0
Enterocloster bolteae	1	0	0	0	0	0	0	0	0	0
Enterococcus canintestini	1	0	0	0	1	0	0	0	0	0
Enterococcus cecorum	1	0	0	0	1	0	0	0	0	0
Enterococcus faecalis	1	0	1	0	1	0	0	0	0	0
Enterococcus faecium	1	0	1	0	1	0	0	0	0	0
Epibacterium multivorans	1	0	0	0	0	0	0	0	0	0
Erwinia sp. 198	1	0	0	0	0	0	0	0	0	0
Escherichia coli	1	0	1	0	1	1	0	0	0	0
Ethanoligenens harbinense	1	0	0	0	0	0	0	0	0	0
Eubacterium sp. 14-2	1	0	0	0	1	0	0	0	0	0
Exiguobacterium sp. BMC-KP	1	0	0	0	0	0	0	0	0	0
Ezakiella peruensis	1	0	0	0	0	0	0	0	0	0
Facklamia languida	1	0	0	0	0	0	0	0	0	0
Facklamia tabacinasalis	1	0	0	0	1	0	0	0	0	0
Faecalibacterium prausnitzii	1	0	0	0	1	0	0	0	0	0
Ferrovum myxofaciens	1	0	0	0	1	0	0	0	0	0
Fibrella sp. ES10-3-2-2	1	0	0	0	1	0	0	0	0	0
Fictibacillus macauensis	1	0	0	0	1	0	0	0	0	0
Fictibacillus phosphorivorans	1	0	0	0	0	0	0	0	0	0
Finegoldia magna	1	1	1	0	1	0	0	0	0	0
Firmicutes bacterium	1	0	1	0	1	0	0	0	0	0
Firmicutes bacterium CAG_194_44_15	1	0	0	0	0	0	0	0	0	0
Firmicutes bacterium HGW-Firmicutes-12	1	0	0	0	0	0	0	0	0	0
Flaviflexus sp. H23T48	1	0	0	0	0	0	0	0	0	0
Flavivirga rizhaonensis	1	0	0	0	0	0	0	0	0	0
Flavobacteria bacterium GWA2_35_26	1	0	0	0	1	0	0	0	0	0
Flavobacteriales bacterium	1	0	1	0	1	0	0	0	0	0
Flavobacteriia bacterium	1	0	1	0	1	0	0	0	0	0
Flavobacterium hiemivividum	1	0	0	0	0	0	0	0	0	0
Flavobacterium magnum	1	0	0	0	0	0	0	0	0	0
Flavobacterium psychrotolerans	1	0	0	0	1	0	0	0	0	0
Flavobacterium seoulense	1	0	1	0	1	0	0	0	0	0
Flavobacterium sp.	1	0	1	0	1	0	0	0	0	0
Flavobacterium sp. 120	1	0	0	0	0	0	0	0	0	0
Flavobacterium sp. ALD4	1	0	0	0	0	0	0	0	0	0
Flavobacterium sp. FEMGT703F	1	0	0	0	0	0	0	0	0	0
Flavobacterium urocaniciphilum	1	0	0	0	1	0	0	0	0	0
Flavonifractor plautii	1	0	0	0	0	0	0	0	0	0
Fluviicoccus keumensis	1	0	0	0	1	0	0	0	0	0
Fodinicurvata sediminis	1	0	0	0	1	0	0	0	0	0
Fonticella tunisiensis	1	0	0	0	1	0	0	0	0	0
Francisella sp.	1	1	1	0	0	0	0	0	0	0
Frankia sp. Ea1.12	1	0	0	0	0	0	0	0	0	0
Frankia sp. QA3	1	0	0	0	1	0	0	1	0	0
Frankiales bacterium YIM 75000	1	0	0	0	1	0	0	0	0	0
Friedmanniella luteola	1	0	0	0	0	0	0	0	0	0
Friedmanniella sagamiharensis	1	0	0	0	1	0	0	0	0	0
Fusobacterium sp. CAG:649	1	0	0	0	0	0	0	0	0	0
Gallionellaceae bacterium	1	0	0	0	1	0	0	0	0	0
Gallionellales bacterium RIFCSPLOWO2_02_FULL_59_110	1	0	0	0	0	0	0	0	0	0
Gammaproteobacteria bacterium	1	0	1	0	1	0	0	1	0	0
Gammaproteobacteria bacterium 45_16_T64	1	0	0	0	0	0	0	0	0	0
Gardnerella sp. KA00735	1	0	0	0	0	0	0	0	0	0
Gardnerella vaginalis	1	0	0	0	1	0	0	0	0	0
Geitlerinema sp. PCC 7407	1	0	0	0	0	0	0	0	0	0
Gemella haemolysans	1	0	1	1	0	1	0	0	0	0
Gemmata obscuriglobus	1	0	0	0	1	0	0	0	0	0
Gemmata sp. SH-PL17	1	0	0	0	1	0	0	0	0	0
Gemmatimonadales bacterium	1	0	0	0	1	0	0	0	0	0
Gemmatimonadetes bacterium 13_2_20CM_70_9	1	0	0	0	0	0	0	0	0	0
Gemmatimonadetes bacterium GWC2_71_9	1	0	0	0	0	0	0	0	0	0
Gemmatirosa kalamazoonesis	1	0	1	0	1	0	0	0	0	0
Gemmiger sp. An120	1	0	0	0	0	0	0	0	0	0
Geobacillus galactosidasius	1	0	0	0	0	0	0	0	0	0
Geobacillus proteiniphilus	1	0	0	0	1	0	0	0	0	0
Geobacillus sp. WSUCF1	1	0	0	0	1	0	0	0	0	0
Geodermatophilus sp. LHW52908	1	0	0	0	0	0	0	0	0	0
Geovibrio sp. L21-Ace-BES	1	0	0	0	0	0	0	0	0	0
Glaciihabitans arcticus	1	0	0	0	0	0	0	0	0	0
Glutamicibacter arilaitensis	1	0	0	0	0	0	0	0	0	0
Glycomyces dulcitolivorans	1	0	0	0	1	0	0	0	0	0
Gordonia effusa	1	0	0	0	1	0	0	0	0	0
Gordonia jacobaea	1	0	0	0	0	0	0	0	0	0
Gordonia sp.	1	0	0	0	1	0	0	0	0	0
Gordonia sp. 852002-10350_SCH5691597	1	0	0	0	0	0	0	0	0	0
Granulicatella sp.	1	0	1	0	1	0	1	0	0	0
Granulicoccus phenolivorans	1	0	0	0	0	0	0	0	0	0
Gryllotalpicola sp. 2DFW10M-5	1	0	0	0	0	0	0	1	0	0
Gulosibacter sp. Marseille-P7157	1	0	0	0	0	0	0	1	0	0
Gynuella sunshinyii	1	0	0	0	1	0	0	0	0	0
Haematobacter genomosp. 1	1	0	0	0	0	0	0	0	0	0
Haematobacter massiliensis	1	0	0	0	0	0	0	0	0	0
Haematobacter missouriensis	1	0	0	0	0	0	0	0	0	0
Haloactinospora alba	1	0	0	0	0	0	0	0	0	0
Halomonas sp. QHL1	1	0	0	0	0	0	0	0	0	0
Hathewaya histolytica	1	0	0	0	0	0	0	0	0	0
Helcococcus ovis	1	0	0	0	0	0	0	0	0	0
Helicobacter sp. 16-1353	1	0	0	0	0	0	0	0	0	0
Helicobacter suis	1	0	0	0	0	0	0	0	0	0
Heliobacterium modesticaldum	1	0	0	0	0	0	0	0	0	0
Herbaspirillum huttiense	1	0	0	0	0	0	0	0	0	0
Homoserinimonas aerilata	1	0	0	0	0	0	0	0	0	0
Hungatella hathewayi	1	0	0	1	1	1	0	0	0	0
Hydrogenimonas sp.	1	0	0	0	0	0	0	0	0	0
Hydrogenophaga crassostreae	1	0	0	0	0	0	0	0	0	0
Hydrogenophaga pseudoflava	1	0	0	0	0	0	0	0	0	0
Hydrogenophaga sp. 2FB	1	0	0	0	1	0	0	0	0	0
Hydrogenophaga sp. H7	1	0	0	0	1	0	0	0	0	0
Hydrogenophaga sp. PAMC20947	1	0	1	0	1	0	0	0	0	0
Hydrogenophaga sp. T4	1	0	1	0	1	0	0	0	0	0
Hymenobacter lapidarius	1	0	1	0	1	0	0	0	0	0
Hymenobacter nivis	1	0	0	0	1	0	0	0	0	0
Hymenobacter oligotrophus	1	0	0	0	1	0	0	0	0	0
Hymenobacter sediminis	1	0	0	0	0	0	0	0	0	0
Hymenobacter sp. IS2118	1	0	0	0	0	0	0	0	0	0
Hyphomicrobium denitrificans	1	0	1	0	1	0	0	0	0	0
Hyphomicrobium zavarzinii	1	0	1	0	0	0	0	0	0	0
Hyphomonas johnsonii	1	0	0	0	1	0	0	0	0	0
Ideonella sp. KYPY4	1	0	0	0	1	0	0	0	0	0
Inquilinus limosus	1	0	0	0	1	0	0	0	0	0
Janibacter hoylei	1	0	0	0	1	0	0	0	0	0
Jatrophihabitans sp.	1	0	0	0	0	0	0	0	0	0
Jiangella aurantiaca	1	0	0	0	0	0	0	1	0	0
Kitasatospora sp. CB01950	1	0	0	0	0	0	0	0	0	0
Kitasatospora sp. MMS16-CNU292	1	0	0	0	0	0	0	0	0	0
Klebsiella pneumoniae	1	0	1	0	1	1	0	0	0	0
Knoellia sinensis	1	0	0	0	1	0	0	0	0	0
Kocuria palustris	1	0	0	0	0	0	0	0	0	0
Kocuria rhizophila	1	0	1	0	0	0	0	1	0	0
Kocuria salsicia	1	0	0	0	0	0	0	0	0	0
Kocuria sp. PT10	1	0	0	0	0	0	0	0	0	0
Komagataeibacter xylinus	1	0	0	0	0	0	0	0	0	0
Kribbella sp. VKM Ac-2568	1	0	0	0	0	0	0	0	0	0
Labrenzia alba	1	0	0	0	0	0	0	0	0	0
Lachnoclostridium sp. An169	1	0	0	0	0	0	0	0	0	0
Lachnospira eligens	1	0	0	0	1	0	0	0	0	0
Lachnospiraceae bacterium	1	0	1	0	1	0	0	1	0	0
Lachnospiraceae bacterium AB2028	1	0	0	0	0	0	0	0	0	0
Lachnospiraceae bacterium C7	1	0	0	0	0	0	0	0	0	0
Lachnospiraceae bacterium CAG:215	1	0	0	0	0	0	0	0	0	0
Lachnospiraceae bacterium MD2004	1	0	0	0	0	0	0	0	0	0
Lachnospiraceae bacterium NK4A144	1	0	0	0	0	0	0	0	0	0
Lachnospiraceae bacterium XBB2008	1	0	0	0	0	0	0	0	0	0
Lachnospiraceae bacterium XBD2001	1	0	0	0	0	0	0	0	0	0
Lactobacillus brevis	1	0	0	0	1	0	0	0	0	0
Lactobacillus camelliae	1	0	0	0	0	0	0	0	0	0
Lactobacillus crispatus	1	0	0	0	1	0	0	0	0	0
Lactobacillus iners	1	0	1	0	1	0	0	0	0	0
Lactobacillus parakefiri	1	0	0	0	0	0	0	0	0	0
Lactobacillus reuteri	1	0	0	0	1	0	0	0	0	0
Lactococcus sp. KACC 19320	1	0	0	0	0	0	0	0	0	0
Lawsonella clevelandensis	1	1	1	0	1	1	0	1	0	0
Legionella feeleii	1	0	0	0	1	0	0	0	0	0
Legionella sp.	1	0	0	0	1	0	0	0	0	0
Legionellales bacterium RIFCSPHIGHO2_12_FULL_35_11	1	0	0	0	0	0	0	0	0	0
Leifsonia sp. Root227	1	0	0	0	1	0	0	0	0	0
Lentibacillus sediminis	1	0	0	0	0	0	0	0	0	0
Lentisphaerae bacterium GWF2_50_93	1	0	0	0	1	0	0	0	0	0
Lentisphaerae bacterium RIFOXYA12_FULL_48_11	1	0	0	0	1	0	0	0	0	0
Leptolyngbya sp. BC1307	1	0	0	0	1	0	0	0	0	0
Leptospira bandrabouensis	1	0	0	0	0	0	0	0	0	0
Leptospira dzoumogneensis	1	0	0	0	0	0	0	0	0	0
Leptospira wolffii	1	0	0	0	0	0	0	0	0	0
Leuconostoc mesenteroides	1	0	0	0	1	0	0	0	0	0
Lewinella agarilytica	1	0	0	0	0	0	0	0	0	0
Lichenibacterium minor	1	0	0	0	1	0	0	0	0	0
Limnobacter sp.	1	0	0	0	0	0	0	0	0	0
Limnohabitans sp. 2KL-17	1	0	0	0	0	0	0	0	0	0
Limnohabitans sp. Rim28	1	0	0	0	1	0	0	0	0	0
Limnohabitans sp. Rim47	1	0	0	0	1	0	0	0	0	0
Limnohabitans sp. T6-5	1	0	0	0	0	0	0	0	0	0
Limnohabitans sp. TS-CS-82	1	0	1	0	1	0	0	0	0	0
Limnothrix sp. PR1529	1	0	0	0	0	0	0	0	0	0
Litorilinea aerophila	1	0	0	0	1	0	0	0	0	0
Luteibacter yeojuensis	1	0	1	0	1	0	0	0	0	0
Luteipulveratus mongoliensis	1	0	0	0	1	0	0	0	0	0
Lutibacter maritimus	1	0	0	0	0	0	0	0	0	0
Lysinibacillus halotolerans	1	0	0	0	0	0	0	0	0	0
Lysinibacillus telephonicus	1	0	0	0	1	0	0	0	0	0
Lysobacter alkalisoli	1	0	0	0	0	0	0	0	0	0
Malikia granosa	1	0	0	0	0	0	0	0	0	0
Malikia spinosa	1	0	0	0	1	0	0	0	0	0
Marinibacterium profundimaris	1	0	0	0	1	0	0	0	0	0
Marinobacter hydrocarbonoclasticus	1	0	0	0	1	0	0	0	0	0
Marinobacter sp. LQ44	1	0	0	0	0	0	0	0	0	0
Marinococcus halophilus	1	0	0	0	0	0	0	0	0	0
Marinomonas rhizomae	1	0	0	0	0	0	0	0	0	0
Marivita hallyeonensis	1	0	0	0	0	0	0	0	0	0
Martelella mediterranea	1	0	0	0	1	0	0	0	0	0
Marvinbryantia formatexigens	1	0	0	0	0	0	0	0	0	0
Massilia glaciei	1	0	0	0	0	0	0	0	0	0
Massilia lurida	1	0	0	0	1	0	0	0	0	0
Massilia sp. CF038	1	0	0	0	0	0	0	0	0	0
Massilia sp. Mn16-1_5	1	0	0	0	0	0	0	0	0	0
Massilia timonae	1	0	0	0	1	0	0	0	0	0
Megasphaera genomosp. type_1	1	0	0	0	0	0	0	0	0	0
Megasphaera sp. DISK 18	1	0	0	0	0	0	0	0	0	0
Megasphaera sp. UPII 135-E	1	0	0	0	0	0	0	0	0	0
Megasphaera sp. UPII 199-6	1	0	0	0	0	0	0	0	0	0
Mesorhizobium sp.	1	0	1	0	1	0	0	0	0	1
Mesorhizobium sp. M7A.F.Ca.AU.001.01.1.1	1	0	0	0	0	0	0	0	0	0
Methylobacterium phyllostachyos	1	0	0	0	1	1	0	0	0	0
Methylocapsa aurea	1	0	0	0	1	0	0	0	0	0
Methyloferula stellata	1	0	0	0	0	0	0	0	0	0
Methylophilus sp.	1	0	0	0	1	0	0	0	0	0
Methylorubrum extorquens	1	0	0	0	1	0	0	0	0	0
Methylorubrum sp. Q1	1	0	0	0	0	0	0	0	0	0
Methyloversatilis discipulorum	1	0	0	0	1	0	0	0	0	0
Microbacterium lacticum	1	0	0	0	0	0	0	1	0	0
Microbacterium sp. 1.5R	1	0	0	0	0	0	0	1	0	0
Microbacterium sp. 14-71-5	1	0	0	0	0	0	0	0	0	0
Microbacterium sp. CH1	1	0	0	0	0	0	0	0	0	0
Microbacterium sp. SLBN-146	1	0	0	0	1	0	0	0	0	0
Microbacterium sp. UMB0228	1	0	0	0	0	0	0	0	0	0
Microbulbifer sp. GL-2	1	0	0	0	1	0	0	0	0	0
Micrococcus luteus	1	0	0	0	1	0	0	1	0	0
Micrococcus lylae	1	0	0	0	1	0	0	0	0	0
Micrococcus terreus	1	0	0	0	0	0	0	0	0	0
Micromonospora kangleipakensis	1	0	0	0	0	0	0	0	0	0
Micromonospora pattaloongensis	1	0	0	0	0	0	0	0	0	0
Micromonospora yangpuensis	1	0	0	0	1	0	0	0	0	0
Minicystis rosea	1	0	0	0	1	0	0	0	0	0
Miniimonas arenae	1	0	0	0	0	0	0	0	0	0
Mobiluncus curtisii	1	0	0	0	1	0	0	0	0	0
Mobiluncus holmesii	1	0	0	0	0	0	0	0	0	0
Mogibacterium pumilum	1	0	0	0	0	0	0	0	0	0
Moheibacter sediminis	1	0	0	0	0	0	0	0	0	0
Moraxella sp.	1	0	0	0	1	0	0	0	0	0
Moraxellaceae bacterium	1	0	0	0	1	0	0	0	0	0
Moraxellaceae bacterium AER2_44_116	1	0	0	0	1	0	0	0	0	0
Mucilaginibacter sp. L294	1	0	0	0	1	0	0	0	0	0
Muribaculaceae bacterium Isolate-037 (Harlan)	1	0	0	0	0	0	0	0	0	0
Muricauda sp. GCL-11	1	0	0	0	0	0	0	0	0	0
Mycetocola sp. 449	1	0	0	0	0	0	0	0	0	0
Mycobacterium aquaticum	1	0	0	0	1	0	0	0	0	0
Mycobacterium attenuatum	1	0	0	0	1	0	0	0	0	0
Mycobacterium chimaera	1	0	0	0	1	0	0	0	0	0
Mycobacterium interjectum	1	0	0	0	0	0	0	0	0	0
Mycobacterium intermedium	1	0	0	0	0	0	0	0	0	0
Mycobacterium kubicae	1	0	0	0	0	0	0	0	0	0
Mycobacterium kyorinense	1	0	0	0	0	0	0	0	0	0
Mycobacterium lacus	1	0	0	1	1	1	0	0	0	0
Mycobacterium parmense	1	0	0	0	0	0	0	0	0	0
Mycobacterium shimoidei	1	0	0	0	0	0	0	1	0	0
Mycobacterium sp.	1	0	1	0	1	0	0	0	0	0
Mycobacterium sp. 1165178.9	1	0	0	0	0	0	0	0	0	0
Mycobacterium sp. 1245111.1	1	0	0	0	0	0	0	0	0	0
Mycobacterium sp. 16-83	1	0	0	0	0	0	0	0	0	0
Mycobacterium sp. 852002-50816_SCH5313054-b	1	0	0	0	0	0	0	0	0	0
Mycobacterium sp. ITM-2016-00317	1	0	0	0	1	0	0	0	0	0
Mycobacterium sp. MFM001	1	0	0	0	0	0	0	0	0	0
Mycobacterium triplex	1	0	0	0	0	0	0	0	0	0
Mycobacterium tuberculosis	1	0	0	0	1	0	0	0	0	0
Mycobacterium xenopi	1	0	0	0	0	0	0	0	0	0
Mycobacteroides abscessus	1	0	1	1	1	0	0	1	0	0
Mycolicibacterium aichiense	1	0	0	0	0	0	0	0	0	0
Mycolicibacterium aurum	1	0	0	0	1	0	0	0	0	0
Mycolicibacterium doricum	1	0	0	0	0	0	0	0	0	0
Mycolicibacterium iranicum	1	0	0	0	0	0	0	0	0	0
Mycolicibacterium mucogenicum	1	0	0	0	1	0	0	0	0	0
Mycolicibacterium rhodesiae	1	0	0	0	1	0	0	0	0	0
Mycolicibacterium sp. 018/SC-01/001	1	0	0	0	1	0	0	0	0	0
Myxococcus macrosporus	1	0	0	0	0	0	0	0	0	0
Myxosarcina sp. GI1	1	0	0	0	1	0	0	0	0	0
Neisseria sp. HMSC065C04	1	0	0	0	0	0	0	0	0	0
Neisseriaceae bacterium	1	0	0	0	1	0	0	0	0	0
Neomicrococcus aestuarii	1	0	1	0	0	0	0	1	0	0
Nesterenkonia populi	1	0	0	0	0	0	0	0	0	0
Nissabacter sp. SGAir0207	1	0	0	0	0	0	0	0	0	0
Nitratireductor sp. XY-223	1	0	0	0	0	0	0	0	0	0
Nitrolancea hollandica	1	0	0	0	1	0	0	0	0	0
Nitrosococcus oceani	1	0	0	0	1	0	0	0	0	0
Nitrosospira multiformis	1	0	0	0	1	0	0	0	0	0
Nocardia altamirensis	1	0	0	0	1	0	0	0	0	0
Nocardia asiatica	1	0	0	0	0	0	0	0	0	0
Nocardia brevicatena	1	0	0	0	1	0	0	0	0	0
Nocardia cerradoensis	1	0	0	0	1	0	0	0	0	0
Nocardia concava	1	0	0	0	0	0	0	0	0	0
Nocardia otitidiscaviarum	1	0	0	0	1	0	0	0	0	0
Nocardioides albertanoniae	1	0	0	0	0	0	0	0	0	0
Nocardioides sp. 4053	1	0	0	0	0	0	0	0	0	0
Nocardioides sp. BGMRC 2183	1	0	1	0	1	0	0	0	0	0
Nocardioides sp. GY 10113	1	0	0	0	0	0	0	0	0	0
Nocardioides sp. LS1	1	0	0	0	0	0	0	0	0	0
Nocardioides sp. MMS17-SY213	1	0	0	0	0	0	0	0	0	0
Nocardioides sp. Root122	1	0	0	0	0	0	0	0	0	0
Nocardiopsis sp. NRRL B-16309	1	0	0	0	0	0	0	0	0	0
Nodularia spumigena	1	0	1	0	1	0	0	0	0	0
Nonomuraea turkmeniaca	1	0	0	0	1	0	0	0	0	0
Nostoc linckia	1	0	0	0	1	0	0	0	0	0
Nostocales cyanobacterium HT-58-2	1	0	0	0	0	0	0	0	0	0
Noviherbaspirillum humi	1	0	0	0	1	0	0	0	0	0
Novosphingobium sediminis	1	0	0	0	1	0	0	0	0	0
Novosphingobium sp.	1	0	1	0	1	0	0	1	0	0
Novosphingobium sp. 63-713	1	0	0	0	0	0	0	0	0	0
Novosphingobium sp. HII-3	1	0	0	0	0	0	0	0	0	0
Novosphingobium sp. PhB165	1	0	0	0	0	0	0	0	0	0
Novosphingobium sp. SCN 63-17	1	0	0	0	1	0	0	0	0	0
Olsenella urininfantis	1	0	0	0	0	0	0	0	0	0
Omnitrophica WOR_2 bacterium SM23_29	1	0	0	0	0	0	0	0	0	0
Oribacterium sp. C9	1	0	0	0	0	0	0	0	0	0
Oscillatoriales cyanobacterium USR001	1	0	0	0	0	0	0	0	0	0
Oscillibacter sp. 1-3	1	0	0	0	1	0	0	0	0	0
Oxalobacteraceae bacterium	1	0	1	0	1	0	0	0	0	0
Paenibacillus borealis	1	0	0	0	1	0	0	0	0	0
Paenibacillus odorifer	1	0	1	0	1	1	0	0	0	0
Paenibacillus peoriae	1	0	0	0	0	0	0	0	0	0
Paenibacillus polymyxa	1	0	0	0	1	0	0	0	0	0
Paenibacillus rigui	1	0	0	0	0	0	0	0	0	0
Paenibacillus sp. FSL H7-0326	1	0	0	0	1	0	0	0	0	0
Paenibacillus sp. P22	1	0	0	0	0	0	0	0	0	0
Pantoea ananatis	1	0	0	0	1	0	0	0	0	0
Pantoea eucrina	1	0	0	0	0	0	0	0	0	0
Parabacteroides sp. AM08-6	1	0	0	0	0	0	0	0	0	0
Paraburkholderia guartelaensis	1	0	0	0	1	0	0	0	0	0
Paraburkholderia sp. DHOM06	1	0	1	0	1	0	0	0	0	0
Paracoccus aeridis	1	0	1	0	0	0	0	0	0	0
Paracoccus marinus	1	0	1	0	0	0	0	0	0	0
Paracoccus salipaludis	1	0	0	0	0	0	0	0	0	0
Paracoccus sediminis	1	0	0	0	0	0	0	0	0	0
Paracoccus sp. GY0581	1	0	0	0	0	0	0	0	0	0
Paracoccus sp. M1-83	1	0	1	0	0	0	0	0	0	0
Paracoccus sp. S4493	1	0	0	0	0	0	0	0	0	0
Paracoccus sp. SY	1	0	0	0	1	0	0	0	0	0
Pararhodospirillum photometricum	1	0	1	0	1	0	0	0	0	0
Parcubacteria bacterium C7867-001	1	0	0	0	1	0	0	0	0	0
Parcubacteria group bacterium Athens1014_26	1	0	0	0	1	0	0	0	0	0
Parcubacteria group bacterium GW2011_GWC2_38_7	1	0	0	0	0	0	0	0	0	0
Parcubacteria group bacterium Gr01-1014_8	1	0	0	0	1	0	0	0	0	0
Parcubacteria group bacterium Licking1014_17	1	0	0	0	1	0	0	0	0	0
Parvimonas sp. oral taxon 110	1	0	0	0	0	0	0	0	0	0
Parvularcula oceani	1	0	0	0	1	0	0	0	0	0
Pasteurella oralis	1	0	0	0	0	0	0	0	0	0
Paucibacter sp. KBW04	1	0	0	0	1	0	0	0	0	0
Pediococcus damnosus	1	0	0	0	0	0	0	0	0	0
Pedobacter nototheniae	1	0	0	0	0	0	0	0	0	0
Pedobacter nutrimenti	1	0	0	0	1	0	0	0	0	0
Pelomonas puraquae	1	0	1	0	0	0	0	0	0	0
Pelomonas saccharophila	1	0	1	0	1	0	0	0	0	0
Pelomonas sp. BT06	1	0	1	0	1	0	0	0	0	0
Pelomonas sp. HMWF004	1	0	1	0	1	0	0	0	0	0
Pelomonas sp. KK5	1	0	1	0	1	0	0	0	0	0
Pelomonas sp. Root1217	1	0	1	0	0	0	0	0	0	0
Pelomonas sp. Root1237	1	0	1	0	1	0	0	0	0	0
Pelomonas sp. Root1444	1	0	1	0	1	0	0	0	0	0
Pelotomaculum sp. FP	1	0	0	0	0	0	0	0	0	0
Peptococcus niger	1	0	1	0	0	0	0	0	0	0
Peptoniphilaceae bacterium	1	0	0	0	1	0	0	0	0	0
Peptoniphilus lacrimalis	1	0	0	0	0	0	0	0	0	0
Peptoniphilus lacydonensis	1	0	0	0	0	0	0	0	0	0
Peptoniphilus pacaensis	1	0	0	0	0	0	0	0	0	0
Peptoniphilus sp. Marseille-P3761	1	0	0	0	0	0	0	0	0	0
Peptoniphilus vaginalis	1	0	0	0	0	0	0	0	0	0
Peptostreptococcus anaerobius	1	0	0	0	0	0	0	0	0	0
Peptostreptococcus anaerobius CAG:621	1	0	0	0	0	0	0	0	0	0
Peptostreptococcus stomatis	1	0	0	0	0	0	0	0	0	0
Petrotoga mobilis	1	0	0	0	1	0	0	0	0	0
Phascolarctobacterium succinatutens	1	0	0	0	1	0	0	0	0	0
Phenylobacterium deserti	1	0	0	0	1	0	0	0	0	0
Phenylobacterium hankyongense	1	0	0	0	0	0	0	0	0	0
Phocaeicola abscessus	1	0	0	0	0	0	0	0	0	0
Photobacterium lutimaris	1	0	0	0	1	0	0	0	0	0
Phycisphaerae bacterium SM23_33	1	0	0	0	1	0	0	0	0	0
Planctomycetes bacterium	1	0	1	0	1	1	0	0	0	0
Planctomycetes bacterium EC9	1	0	0	0	1	0	0	0	0	0
Planctomycetes bacterium Pla144	1	0	0	0	0	0	0	0	0	0
Planctomycetes bacterium Pla85_3_4	1	0	0	0	1	0	0	0	0	0
Planctomycetes bacterium SRT547	1	0	0	0	0	0	0	0	0	0
Planctomycetia bacterium 21-64-5	1	0	0	0	0	0	0	0	0	0
Plesiocystis pacifica	1	0	0	0	1	0	0	0	0	0
Polynucleobacter cosmopolitanus	1	0	0	0	0	0	0	0	0	0
Pontibacter korlensis	1	0	0	0	1	0	0	0	0	0
Porphyromonas asaccharolytica	1	0	0	0	0	0	0	0	0	0
Porphyromonas macacae	1	0	0	0	0	0	0	0	0	0
Porphyromonas sp. HMSC065F10	1	0	0	0	0	1	0	0	0	0
Porphyromonas sp. KLE 1280	1	0	1	0	0	0	0	0	0	0
Porphyromonas sp. oral taxon 279	1	0	1	0	0	0	0	0	0	0
Porphyromonas uenonis	1	0	0	0	0	0	0	0	0	0
Prevotella amnii	1	0	0	0	0	0	0	0	0	0
Prevotella baroniae	1	0	0	0	0	0	0	0	0	0
Prevotella bergensis	1	0	0	0	0	0	0	1	0	0
Prevotella bivia	1	0	0	0	1	0	0	0	0	0
Prevotella brunnea	1	0	0	0	0	0	0	0	0	0
Prevotella buccalis	1	0	1	0	0	0	0	1	0	0
Prevotella colorans	1	0	0	0	0	0	0	0	0	0
Prevotella copri	1	0	1	0	1	0	0	0	0	0
Prevotella corporis	1	0	0	0	1	0	0	0	0	0
Prevotella dentasini	1	0	0	0	0	0	0	0	0	0
Prevotella disiens	1	0	0	0	1	0	0	0	0	0
Prevotella falsenii	1	0	0	0	0	0	0	0	0	0
Prevotella intermedia	1	0	0	0	1	0	0	0	0	0
Prevotella melaninogenica	1	0	0	0	1	0	0	0	0	0
Prevotella micans	1	0	0	0	0	0	0	0	0	0
Prevotella multisaccharivorax	1	0	0	0	0	0	0	1	0	0
Prevotella oralis	1	0	1	0	1	0	0	0	0	0
Prevotella oris	1	0	0	0	1	0	0	0	0	0
Prevotella pallens	1	0	1	0	0	0	0	0	0	0
Prevotella pectinovora	1	0	0	0	0	0	0	0	0	0
Prevotella rara	1	0	0	0	1	0	0	0	0	0
Prevotella salivae	1	0	0	0	0	0	0	0	0	0
Prevotella shahii	1	0	0	0	0	0	0	0	0	0
Prevotella sp.	1	0	0	0	0	0	0	0	0	0
Prevotella sp. CAG:386	1	0	1	0	1	0	0	0	0	0
Prevotella sp. HMSC073D09	1	0	0	0	0	0	0	0	0	0
Prevotella sp. HUN102	1	0	0	0	0	0	0	0	0	0
Prevotella sp. MSX73	1	0	0	0	0	0	0	1	0	0
Prevotella sp. Marseille-P4334	1	0	0	0	0	0	0	1	0	0
Prevotella sp. S7-1-8	1	0	0	0	1	0	0	0	0	0
Prevotella sp. oral taxon 313	1	0	0	0	0	0	0	0	0	0
Prevotella sp. oral taxon 317	1	0	0	0	1	0	0	0	0	0
Prevotella sp. oral taxon 473	1	0	1	0	1	0	0	0	0	0
Prevotella timonensis	1	0	0	0	1	0	0	0	0	0
Promicromonospora sp. SLBN-65	1	0	0	0	0	0	0	0	0	0
Promicromonospora thailandica	1	0	0	0	0	0	0	1	0	0
Propionibacterium freudenreichii	1	0	0	0	0	0	0	0	0	0
Propionimicrobium sp. Marseille-P3275	1	0	0	0	0	0	0	0	0	0
Propionispora sp. 2/2-37	1	0	1	0	0	0	0	0	0	0
Proteiniclasticum ruminis	1	0	0	0	1	0	0	0	0	0
Proteobacteria bacterium	1	0	1	0	1	0	0	0	0	0
Proteobacteria bacterium ST_bin11	1	0	1	0	1	0	0	0	0	0
Proteobacteria bacterium ST_bin15	1	0	0	0	1	0	0	0	0	0
Pseudarthrobacter siccitolerans	1	0	0	0	0	0	0	0	0	0
Pseudoalteromonas agarivorans	1	0	0	0	0	0	0	0	0	0
Pseudobutyrivibrio sp. ACV-2	1	0	0	0	0	0	0	0	0	0
Pseudobutyrivibrio sp. UC1225	1	0	0	0	0	0	0	0	0	0
Pseudoclavibacter alba	1	0	0	0	0	0	0	1	0	0
Pseudoglutamicibacter albus	1	0	0	0	0	0	0	1	0	0
Pseudolysobacter antarcticus	1	0	0	0	0	0	0	0	0	0
Pseudomonas aeruginosa	1	0	1	0	1	0	0	1	0	0
Pseudomonas brassicacearum	1	0	1	0	1	0	0	0	0	0
Pseudomonas chlororaphis	1	0	1	0	1	0	0	1	0	0
Pseudomonas citronellolis	1	0	1	0	1	0	0	0	0	0
Pseudomonas coronafaciens	1	0	0	0	1	0	0	0	0	0
Pseudomonas formosensis	1	0	0	0	1	0	0	0	0	0
Pseudomonas fulva	1	0	1	0	1	0	0	0	0	0
Pseudomonas furukawaii	1	0	1	0	0	0	0	0	0	0
Pseudomonas graminis	1	0	0	0	0	0	0	0	0	0
Pseudomonas kuykendallii	1	0	0	0	0	0	0	0	0	0
Pseudomonas massiliensis	1	0	0	0	1	0	0	0	0	0
Pseudomonas putida	1	0	1	0	1	0	0	1	0	0
Pseudomonas savastanoi	1	0	1	0	1	0	0	1	0	0
Pseudomonas sp.	1	0	0	0	1	0	0	0	0	0
Pseudomonas sp. ATCC PTA-122608	1	0	0	0	1	0	0	0	0	0
Pseudomonas sp. BRM28	1	0	0	0	1	0	0	0	0	0
Pseudomonas sp. FW215-R3	1	0	0	0	0	0	0	0	0	0
Pseudomonas sp. FW305-47B	1	0	0	0	0	0	0	0	0	0
Pseudomonas sp. G5(2012)	1	0	0	0	1	0	0	0	0	0
Pseudomonas sp. H1h	1	0	0	0	1	0	0	0	0	0
Pseudomonas sp. K2I15	1	0	0	0	0	0	0	0	0	0
Pseudomonas sp. MYb185	1	0	0	0	0	0	0	0	0	0
Pseudomonas sp. PAMC 26793	1	0	0	0	0	0	0	0	0	0
Pseudomonas sp. WCHPs060044	1	0	0	0	1	0	0	0	0	0
Pseudomonas stutzeri	1	0	1	0	1	0	0	1	0	0
Pseudomonas syringae	1	0	1	0	1	0	0	0	0	0
Pseudonocardia sp. CNS-139	1	0	1	0	1	0	0	0	0	0
Pseudoxanthomonas sp. Root65	1	0	0	0	0	0	0	0	0	0
Pseudozobellia thermophila	1	0	0	0	1	0	0	0	0	0
Psychrobacter urativorans	1	0	0	0	0	0	0	0	0	0
Psychroflexus sp. WDS2C27	1	0	0	0	0	0	0	0	0	0
Psychromonas sp. psych-6C06	1	0	0	0	0	0	0	0	0	0
Pusillimonas caeni	1	0	0	0	1	0	0	0	0	0
Pusillimonas sp. JR1/69-2-13	1	0	0	0	0	0	0	0	0	0
Ralstonia solanacearum	1	0	0	0	1	0	0	1	0	0
Ralstonia sp. 4NA327D5	1	0	0	0	1	0	0	0	0	0
Ralstonia sp. A12	1	0	0	0	1	0	0	0	0	0
Ralstonia sp. MD27	1	0	0	0	0	0	0	0	0	0
Rathayibacter oskolensis	1	0	0	0	0	0	0	1	0	0
Reyranella sp.	1	0	0	0	1	0	0	0	0	0
Rhizobiaceae bacterium CPCC 101076	1	0	0	0	1	0	0	0	0	0
Rhizobiales bacterium	1	0	1	0	1	0	0	1	0	0
Rhizobiales bacterium 64-17	1	0	0	0	1	0	0	0	0	0
Rhizobium album	1	0	0	0	0	0	0	0	0	0
Rhizobium leguminosarum	1	0	1	0	1	0	0	0	0	0
Rhizobium oryziradicis	1	0	0	0	1	0	0	0	0	0
Rhizobium pisi	1	0	0	0	0	0	0	0	0	0
Rhodanobacter sp. FW510-R12	1	0	0	0	1	0	0	0	0	0
Rhodanobacter sp. Root179	1	0	0	0	0	0	0	0	0	0
Rhodanobacteraceae bacterium	1	0	0	0	1	0	0	0	0	0
Rhodobacter sp. CACIA14H1	1	0	0	0	0	0	0	0	0	0
Rhodobacteraceae bacterium	1	0	0	0	1	0	0	0	0	0
Rhodobacteraceae bacterium DSL-40	1	0	0	0	0	0	0	0	0	0
Rhodobacteraceae bacterium PARR1	1	0	0	0	1	0	0	0	0	0
Rhodobacterales bacterium	1	0	0	0	1	0	0	0	0	0
Rhodococcus opacus	1	0	0	0	1	0	0	0	0	0
Rhodococcus sp. AG1013	1	0	0	0	1	0	0	0	0	0
Rhodococcus sp. C1-24	1	0	0	0	0	0	0	0	0	0
Rhodococcus sp. PML026	1	0	0	0	0	0	0	0	0	0
Rhodococcus sp. RD6.2	1	0	1	0	0	0	0	0	0	0
Rhodococcus sp. UNC363MFTsu5.1	1	0	0	0	0	0	0	0	0	0
Rhodocyclaceae bacterium	1	0	1	0	1	0	0	0	0	0
Rhodocyclales bacterium	1	0	0	0	0	0	0	0	0	0
Rhodoferax fermentans	1	0	0	0	1	0	0	0	0	0
Rhodoferax ferrireducens	1	0	0	0	1	0	0	0	0	0
Rhodohalobacter halophilus	1	0	0	0	0	0	0	0	0	0
Rhodoluna lacicola	1	0	0	0	1	0	0	1	0	0
Rhodopirellula europaea	1	0	0	0	1	0	0	0	0	0
Rhodopirellula maiorica	1	0	0	0	1	0	0	0	0	0
Rhodospirillaceae bacterium R148	1	0	0	0	0	0	0	0	0	0
Riemerella anatipestifer	1	0	0	0	1	0	0	0	0	0
Roseateles aquatilis	1	0	1	0	0	0	0	0	0	0
Roseateles depolymerans	1	0	1	0	1	0	0	0	0	0
Roseburia faecis	1	0	0	0	0	1	0	0	0	0
Roseburia inulinivorans	1	0	0	0	1	0	0	0	0	0
Roseburia sp. AF20-18LB	1	0	0	0	0	0	0	0	0	0
Roseburia sp. AM51-8	1	0	0	0	0	0	0	0	0	0
Roseomonas aerilata	1	0	0	0	0	0	0	0	0	0
Roseomonas mucosa	1	0	0	0	0	0	0	0	0	0
Rothia mucilaginosa	1	0	1	0	1	0	0	0	0	0
Rothia sp. HMSC065C03	1	0	0	0	0	0	0	0	0	0
Ruania sp. HY211	1	0	0	0	0	0	0	0	0	0
Rubricoccus marinus	1	0	0	0	1	0	0	0	0	0
Rubrivirga marina	1	0	1	0	0	0	0	0	0	0
Rubrivivax sp.	1	0	1	0	1	0	0	0	0	0
Rubrivivax sp. SCN 71-131	1	0	0	0	1	0	0	0	0	0
Ruegeria denitrificans	1	0	0	0	0	0	0	0	0	0
Rufibacter ruber	1	0	0	0	1	0	0	0	0	0
Rufibacter sp. R-22-1c-1	1	0	0	0	1	0	0	0	0	0
Ruminococcus sp. AF13-28	1	0	0	0	0	0	0	0	0	0
Ruminococcus sp. OM05-10BH	1	0	0	0	0	0	0	0	0	0
Runella slithyformis	1	0	0	0	1	0	0	0	0	0
Saccharopolyspora shandongensis	1	0	0	0	1	0	0	0	0	0
Salimicrobium halophilum	1	0	0	0	0	0	0	0	0	0
Salinarimonas rosea	1	0	0	0	1	0	0	0	0	0
Salinibacter sp. 10B	1	0	0	0	0	0	0	0	0	0
Salinicoccus sp. CT19	1	0	0	0	0	0	0	0	0	0
Sanguibacteroides justesenii	1	0	0	0	0	0	0	0	0	0
Sarcina sp. DSM 11001	1	0	0	0	0	0	0	0	0	0
Seinonella peptonophila	1	0	0	0	0	0	0	0	0	0
Selenomonas sp. FC4001	1	0	0	0	0	0	0	0	0	0
Seonamhaeicola sp. S2-3	1	0	0	0	0	0	0	0	0	0
Serinicoccus sediminis	1	0	0	0	0	0	0	0	0	0
Serratia liquefaciens	1	0	0	0	0	0	0	0	0	0
Serratia marcescens	1	0	0	0	1	0	0	0	0	0
Serratia sp. M24T3	1	0	0	0	1	0	0	0	0	0
Serratia symbiotica	1	1	0	0	0	0	0	0	0	0
Siccationidurans arizonensis	1	0	0	0	0	0	0	0	0	0
Sinirhodobacter populi	1	0	0	0	1	0	0	0	0	0
Sinobacteraceae bacterium	1	0	1	0	1	0	0	0	0	0
Sinorhizobium fredii	1	0	0	0	1	0	0	0	0	0
Skermanella aerolata	1	0	0	0	1	0	0	0	0	0
Slackia exigua	1	0	0	0	0	0	0	0	0	0
Slackia sp. CM382	1	0	0	0	0	0	0	0	0	0
Solirubrobacter pauli	1	0	1	0	0	0	0	0	0	0
Solirubrobacter soli	1	0	0	0	1	0	0	0	0	0
Solirubrobacterales bacterium 70-9	1	0	0	0	1	0	0	0	0	0
Sphaerisporangium cinnabarinum	1	0	0	0	1	0	0	0	0	0
Sphaerobacter thermophilus	1	0	1	0	1	0	0	0	0	0
Sphaerochaeta pleomorpha	1	0	0	0	1	0	0	0	0	0
Sphingobacteriales bacterium	1	0	1	0	1	0	0	0	0	0
Sphingobacterium sp. 1.A.4	1	0	0	0	1	0	0	0	0	0
Sphingobacterium sp. IITKGP-BTPF85	1	0	0	0	0	0	0	0	0	0
Sphingobacterium sp. JB170	1	0	0	0	0	0	0	0	0	0
Sphingobium japonicum	1	0	0	0	0	0	0	0	0	0
Sphingobium phenoxybenzoativorans	1	0	0	0	1	0	0	0	0	0
Sphingobium sp. D43FB	1	0	0	0	0	0	0	0	0	0
Sphingobium sp. SCG-1	1	0	0	0	1	0	0	0	0	0
Sphingomonadaceae bacterium	1	0	1	0	1	0	0	0	0	0
Sphingomonas edaphi	1	0	0	0	0	0	0	0	0	0
Sphingomonas guangdongensis	1	0	1	0	0	0	0	0	0	0
Sphingomonas populi	1	0	0	0	1	0	0	0	0	0
Sphingomonas rubra	1	0	1	0	1	0	0	0	0	0
Sphingomonas solaris	1	0	0	0	0	0	0	0	0	0
Sphingomonas sp.	1	0	1	0	1	0	0	0	0	0
Sphingomonas sp. 28-62-11	1	0	0	0	0	0	0	0	0	0
Sphingomonas sp. 3P27F8	1	0	0	0	0	0	0	0	0	0
Sphingomonas sp. Ant H11	1	0	0	0	0	0	0	0	0	0
Sphingomonas sp. Ant20	1	0	0	0	0	0	0	0	0	0
Sphingomonas sp. CF311	1	0	0	0	0	0	0	0	0	0
Sphingomonas sp. IC081	1	0	0	0	0	0	0	0	0	0
Sphingomonas sp. JS21-1	1	0	0	0	0	0	0	0	0	0
Sphingomonas sp. Leaf25	1	0	0	0	0	0	0	0	0	0
Sphingomonas sp. Leaf343	1	0	1	0	0	0	0	0	0	0
Sphingomonas sp. Leaf412	1	0	0	0	0	0	0	0	0	0
Sphingomonas sp. PAMC 26605	1	0	0	0	1	0	0	0	0	0
Sphingomonas sp. PAMC 26621	1	0	0	0	0	0	0	0	0	0
Sphingomonas sp. PP-CE-1A-559	1	0	0	0	0	0	0	0	0	0
Sphingomonas sp. SRS2	1	0	0	0	1	0	0	0	0	0
Sphingomonas sp. STIS6.2	1	0	0	0	0	0	0	0	0	0
Sphingopyxis sp. C-1	1	0	0	0	1	0	0	0	0	0
Sphingosinicella humi	1	0	0	0	0	0	0	0	0	0
Spirochaetaceae bacterium	1	0	0	0	1	0	0	0	0	0
Spirosoma pollinicola	1	0	0	0	1	0	0	0	0	0
Spirosoma rigui	1	0	0	0	1	0	0	0	0	0
Sporanaerobacter sp. JN28	1	0	0	0	0	0	0	0	0	0
Sporolactobacillus laevolacticus	1	0	0	0	0	0	0	0	0	0
Sporosarcina sp. HYO08	1	0	0	0	0	0	0	0	0	0
Stackebrandtia endophytica	1	0	0	0	1	0	0	0	0	0
Staphylococcus aureus	1	0	1	0	1	0	0	0	0	1
Staphylococcus haemolyticus	1	0	0	0	1	0	0	0	0	0
Staphylococcus hominis	1	0	1	0	1	0	0	1	0	0
Staphylococcus pseudintermedius	1	0	0	0	1	0	0	0	0	0
Staphylococcus saccharolyticus	1	0	1	0	0	0	0	0	0	0
Starkeya novella	1	0	0	0	1	0	0	0	0	0
Stenotrophomonas maltophilia	1	0	1	0	1	0	0	1	0	0
Streptacidiphilus jiangxiensis	1	0	0	0	1	0	0	0	0	0
Streptococcus equi	1	0	0	0	1	0	0	0	0	0
Streptococcus gallolyticus	1	0	0	0	1	0	0	1	0	0
Streptococcus intermedius	1	0	0	0	1	0	0	0	0	0
Streptococcus oralis	1	0	0	0	1	0	0	0	0	0
Streptococcus pneumoniae	1	0	1	0	1	0	0	0	0	0
Streptococcus pyogenes	1	0	0	0	1	0	0	0	0	0
Streptococcus thermophilus	1	0	1	0	1	0	0	1	0	0
Streptomyces albidoflavus	1	0	1	0	1	0	0	0	0	0
Streptomyces angustmyceticus	1	0	0	0	0	0	0	0	0	0
Streptomyces calvus	1	0	0	0	0	0	0	0	0	0
Streptomyces carpinensis	1	0	0	0	0	0	0	0	0	0
Streptomyces griseocarneus	1	0	0	0	1	0	0	0	0	0
Streptomyces regalis	1	0	0	0	0	0	0	0	0	0
Streptomyces showdoensis	1	0	0	0	0	0	0	0	0	0
Streptomyces sp. 74	1	0	0	0	1	0	0	0	0	0
Streptomyces sp. BK674	1	0	0	0	1	0	0	0	0	0
Streptomyces sp. CC53	1	0	0	0	1	0	0	1	0	0
Streptomyces sp. CNZ279	1	0	0	0	0	0	0	0	0	0
Streptomyces sp. F-1	1	0	0	0	0	0	0	0	0	0
Streptomyces sp. IB201691-2A2	1	0	0	0	0	0	0	0	0	0
Streptomyces sp. MUSC 125	1	0	0	0	0	0	0	0	0	0
Streptomyces sp. MZ04	1	0	0	0	1	0	0	0	0	0
Streptomyces sp. Ru62	1	0	1	0	0	0	0	0	0	0
Streptomyces sp. SS	1	0	0	0	1	0	0	0	0	0
Streptomyces sp. WAC00263	1	0	0	0	0	0	0	0	0	0
Streptomyces torulosus	1	0	0	0	0	0	0	0	0	0
Streptomyces toyocaensis	1	0	0	0	1	0	0	0	0	0
Streptomyces xylophagus	1	0	1	0	1	0	0	0	0	0
Streptomycetaceae bacterium	1	0	0	0	1	0	0	0	0	0
Succiniclasticum ruminis	1	0	0	0	0	0	0	1	0	0
Succinimonas amylolytica	1	0	0	0	1	0	0	0	0	0
Sulfitobacter pseudonitzschiae	1	0	0	0	0	0	0	0	0	0
Sulfuriferula sp. AH1	1	0	0	0	0	0	0	0	0	0
Sulfurisoma sediminicola	1	0	0	0	0	0	0	0	0	0
Syntrophorhabdus sp. PtaU1.Bin050	1	0	0	0	1	0	0	0	0	0
Tepidicaulis marinus	1	0	0	0	0	0	0	0	0	0
Tepidimonas fonticaldi	1	0	1	0	0	0	0	0	0	0
Tepidimonas taiwanensis	1	0	1	0	0	0	0	0	0	0
Tessaracoccus antarcticus	1	0	0	0	0	0	0	0	0	0
Tessaracoccus sp. OH4464_COT-324	1	0	0	0	0	0	0	1	0	0
Tetrasphaera australiensis	1	0	0	0	0	0	0	0	0	0
Thermicanus aegyptius	1	0	0	0	0	0	0	0	0	0
Thermodesulfovibrio sp. RBG_19FT_COMBO_42_12	1	0	1	0	1	0	0	0	0	0
Thermoleophilia bacterium	1	0	0	0	1	0	0	0	0	0
Thermosynechococcus elongatus	1	0	0	0	0	0	0	0	0	0
Thermosynechococcus vulcanus	1	0	0	0	0	0	0	0	0	0
Thermotoga caldifontis	1	0	0	0	0	0	0	0	0	0
Thermotoga neapolitana	1	0	0	0	0	0	0	0	0	0
Thermus scotoductus	1	0	0	0	1	0	0	0	0	0
Thioclava sp. NG1	1	0	0	0	0	0	0	0	0	0
Thiolapillus brandeum	1	0	0	0	0	0	0	0	0	0
Tsukamurella sp. 1534	1	0	0	0	0	0	0	0	0	0
Uliginosibacterium sp. TH139	1	0	0	0	0	0	0	0	0	0
Ulvibacter sp. LPB0005	1	0	0	0	0	0	0	0	0	0
Varibaculum cambriense	1	0	1	0	0	0	0	0	0	0
Varibaculum vaginae	1	0	0	0	0	0	0	0	0	0
Variovorax sp.	1	0	1	0	1	0	0	0	0	0
Variovorax sp. CF079	1	0	1	0	0	0	0	0	0	0
Variovorax sp. OV329	1	0	0	0	1	0	0	0	0	0
Veillonellaceae bacterium DNF00626	1	0	0	0	0	0	0	0	0	0
Veillonellaceae bacterium DNF00751	1	0	0	0	1	0	0	0	0	0
Veillonellaceae bacterium KA00182	1	0	0	0	0	0	0	0	0	0
Verrucomicrobia bacterium	1	0	1	0	1	0	0	0	0	0
Verrucomicrobia bacterium 12-59-8	1	0	0	0	1	0	0	0	0	0
Verrucomicrobia bacterium TMED71	1	0	0	0	1	0	0	0	0	0
Vibrio campbellii	1	0	0	0	1	0	0	0	0	0
Vibrio cholerae	1	0	0	0	1	0	0	0	0	0
Vibrio maritimus	1	0	0	0	1	0	0	0	0	0
Vibrio nigripulchritudo	1	0	0	0	0	0	0	0	0	0
Vibrio parahaemolyticus	1	0	0	0	1	0	0	0	0	0
Vibrio vulnificus	1	0	1	0	1	0	0	1	0	0
Virgibacillus profundi	1	0	0	0	1	0	0	0	0	0
Vitreoscilla stercoraria	1	0	0	0	1	0	0	0	0	0
Vulcaniibacterium thermophilum	1	0	0	0	0	0	0	0	0	0
Williamsia sterculiae	1	0	0	0	1	0	0	0	0	0
Winkia neuii	1	0	0	0	0	0	0	0	0	0
Winogradskyella jejuensis	1	0	0	0	1	0	0	0	0	0
Wolinella succinogenes	1	0	0	0	1	0	0	0	0	0
Xanthomonadaceae bacterium	1	0	1	0	1	0	0	0	0	0
Xanthomonas sp. GPE 39	1	0	0	0	1	0	0	0	0	0
Xanthomonas translucens	1	0	0	0	1	0	0	0	0	0
Xenophilus azovorans	1	0	0	0	0	0	0	0	0	0
Xylanimonas cellulosilytica	1	0	0	0	1	0	0	0	0	0
Zavarzinella formosa	1	0	0	0	1	0	0	0	0	0
Zymomonas mobilis	1	0	0	0	0	0	0	0	0	0
[Bacteroides] coagulans	1	0	0	0	0	0	0	0	0	0
[Clostridium] methylpentosum	1	0	0	0	0	0	0	0	0	0
[Clostridium] ultunense	1	0	0	0	1	0	0	0	0	0
[Eubacterium] brachy	1	0	0	0	0	0	0	0	0	0
[Eubacterium] rectale	1	0	0	0	1	0	0	0	0	0
[Eubacterium] sulci	1	0	0	0	0	0	0	0	0	0
[Propionibacterium] namnetense	1	0	1	0	1	0	1	0	0	0
[Pseudomonas] mesoacidophila	1	0	0	0	0	0	0	0	0	0
[Ruminococcus] gnavus	1	0	0	0	1	0	0	0	0	0
bacterium	1	0	1	0	1	0	0	1	0	0
bacterium 336/3	1	0	0	0	1	0	0	0	0	0
bacterium C-53	1	0	0	0	0	0	0	0	0	0
bacterium HR16	1	0	0	0	1	0	0	0	0	0
bacterium HR22	1	0	0	0	0	0	0	0	0	0
bacterium endosymbiont of Mortierella elongata FMR23-6	1	0	0	0	0	0	0	0	0	0
beta proteobacterium MWH-P2sevCIIIb	1	0	0	0	1	0	0	0	0	0
candidate division TM6 bacterium GW2011_GWF2_37_49	1	0	0	0	1	0	0	0	0	0
cyanobacterium G8-9	1	0	0	0	1	0	0	0	0	0
delta proteobacterium NaphS2	1	0	0	0	1	0	0	0	0	0
methanotrophic bacterial endosymbiont of Bathymodiolus sp.	1	0	0	0	1	0	0	0	0	0
uncultured Chloroflexi bacterium HF0200_09I09	1	0	0	0	0	0	0	0	0	0
uncultured Clostridium sp.	1	0	0	0	1	0	0	0	0	0
uncultured Desulfobacterium sp.	1	0	0	0	0	0	0	0	0	0
uncultured Mycobacterium sp.	1	0	0	0	0	0	0	0	0	0
uncultured Ruminococcus sp.	1	0	0	0	1	0	0	0	0	0
uncultured Sphingobacteriales bacterium HF0010_19H17	1	0	0	0	0	0	0	0	0	0
uncultured actinobacterium HF0500_35G12	1	0	0	0	0	0	0	0	0	0
uncultured actinobacterium HF4000_04C13	1	0	0	0	1	0	0	0	0	0
uncultured bacterium	1	1	0	0	1	0	0	0	0	0
uncultured bacterium (gcode 4)	1	0	0	0	1	0	0	0	0	0
uncultured bacterium FGYC_13M19	1	0	0	0	0	0	0	0	0	0
uncultured beta proteobacterium CBNPD1 BAC clone 578	1	0	0	0	0	0	0	0	0	0
uncultured delta proteobacterium HF0200_19J16	1	0	0	0	0	0	0	0	0	0
unicellular cyanobacterium SU3	1	0	0	0	0	0	0	0	0	0
Actinomyces sp. oral taxon 170	0	1	1	0	0	0	0	0	0	0
Actinomyces sp. oral taxon 448	0	1	0	0	1	0	0	0	0	0
Baekduia soli	0	1	1	0	1	0	0	0	0	0
Bradyrhizobium sp. ORS 278	0	1	0	0	0	0	0	0	0	0
Comamonadaceae bacterium CG17_big_fil_post_rev_8_21_14_2_50_60_13	0	1	0	0	1	0	0	0	0	0
Confluentimicrobium sp. EMB200-NS6	0	1	0	0	0	0	0	0	0	0
Corynebacterium phoceense	0	1	0	0	0	0	0	0	0	0
Cyanobacteria bacterium J055	0	1	0	0	0	0	0	0	0	0
Delftia acidovorans	0	1	1	0	1	0	0	0	0	0
Empedobacter falsenii	0	1	1	0	1	0	0	0	0	0
Geobacillus thermoleovorans	0	1	0	0	0	0	0	0	0	0
Hymenobacter norwichensis	0	1	1	0	1	0	0	0	0	0
Kingella denitrificans	0	1	0	0	0	0	0	0	0	0
Leucothrix arctica	0	1	0	0	1	0	0	0	0	0
Mameliella alba	0	1	0	0	0	0	0	0	0	0
Martelella sp. BGMRC2036	0	1	0	0	0	0	0	0	0	0
Massilia phosphatilytica	0	1	0	0	0	0	0	0	0	0
Meiothermus hypogaeus	0	1	0	0	0	0	0	0	0	0
Meiothermus taiwanensis	0	1	0	0	0	0	0	0	0	0
Microbacterium aerolatum	0	1	0	0	0	0	0	0	0	0
Microbacterium sp. PM5	0	1	0	0	0	0	0	0	0	0
Ochrobactrum gallinifaecis	0	1	0	0	1	0	0	0	0	0
Pannonibacter phragmitetus	0	1	0	0	0	0	0	0	0	0
Phenylobacterium sp. SCN 69-14	0	1	0	0	0	0	0	0	0	0
Pseudoalteromonas rubra	0	1	0	0	1	0	0	0	0	0
Pseudorhodoferax sp. Leaf274	0	1	0	0	1	0	0	0	0	0
Rhodospirillaceae bacterium SYSU D60006	0	1	0	0	0	0	0	0	0	0
Streptococcus sp. 263_SSPC	0	1	1	0	0	0	0	0	0	0
Streptococcus sp. HPH0090	0	1	0	0	0	0	0	0	0	0
Acetobacter malorum	0	0	1	0	1	0	0	0	0	0
Achromobacter aloeverae	0	0	1	0	1	0	0	0	0	0
Achromobacter sp. 2789STDY5608608	0	0	1	0	0	0	0	0	0	0
Achromobacter sp. MFA1 R4	0	0	1	0	0	0	0	0	0	0
Acidipila sp. 4G-K13	0	0	1	0	0	0	0	0	0	0
Acidovorax caeni	0	0	1	0	1	0	0	0	0	0
Acidovorax sp.	0	0	1	0	0	0	0	0	0	0
Acidovorax sp. Leaf160	0	0	1	0	1	0	0	1	0	0
Acinetobacter bereziniae	0	0	1	0	0	0	0	0	0	0
Acinetobacter harbinensis	0	0	1	0	0	0	0	0	0	0
Acinetobacter indicus	0	0	1	0	1	0	0	0	0	0
Acinetobacter lwoffii	0	0	1	0	1	0	0	0	0	0
Acinetobacter marinus	0	0	1	0	1	0	0	0	0	0
Acinetobacter nosocomialis	0	0	1	0	1	0	0	0	0	0
Acinetobacter radioresistens	0	0	1	0	1	0	0	0	0	0
Acinetobacter sp. 51m	0	0	1	0	0	0	0	0	0	0
Acinetobacter sp. ANC 3903	0	0	1	0	0	0	0	0	0	0
Acinetobacter sp. ANC 4169	0	0	1	0	0	0	0	0	0	0
Acinetobacter sp. ANC 4173	0	0	1	0	0	0	0	0	0	0
Acinetobacter sp. AR2-3	0	0	1	0	0	0	0	0	0	0
Acinetobacter sp. KPC-SM-21	0	0	1	0	0	0	1	0	0	0
Acinetobacter sp. MB5	0	0	1	0	1	0	0	0	0	0
Acinetobacter sp. NIPH 2100	0	0	1	0	0	0	0	0	0	0
Acinetobacter sp. WCHAc060007	0	0	1	0	0	0	0	0	0	0
Acinetobacter tjernbergiae	0	0	1	0	0	0	0	0	0	0
Acinetobacter towneri	0	0	1	0	0	0	0	0	0	0
Actinobacteria bacterium 66_15	0	0	1	0	1	0	0	0	0	0
Actinobacteria bacterium BACL4 MAG-120813-bin39	0	0	1	0	0	0	0	0	0	0
Actinobacteria bacterium RBG_13_55_18	0	0	1	0	0	0	0	0	0	0
Actinobacteria bacterium RBG_16_67_10	0	0	1	0	1	0	0	0	0	0
Actinomyces johnsonii	0	0	1	0	1	0	0	0	0	0
Actinomyces naeslundii	0	0	1	0	0	0	0	0	0	0
Actinomyces oris	0	0	1	0	1	0	0	0	0	0
Actinomycetospora chiangmaiensis	0	0	1	0	1	0	0	0	0	0
Actinophytocola xinjiangensis	0	0	1	0	0	0	0	0	0	0
Actinoplanes sp. LAM7112	0	0	1	0	1	0	0	0	0	0
Actinopolyspora mzabensis	0	0	1	0	0	0	0	0	0	0
Adhaeribacter sp. HMF7605	0	0	1	0	1	0	0	0	0	0
Advenella kashmirensis	0	0	1	0	0	0	0	0	0	0
Aequorivita lipolytica	0	0	1	0	0	0	0	0	0	0
Aeromonas salmonicida	0	0	1	0	1	0	0	0	0	0
Afipia massiliensis	0	0	1	0	0	0	0	0	0	0
Afipia sp. P52-10	0	0	1	0	1	0	0	0	0	0
Agarilytica rhodophyticola	0	0	1	0	1	0	0	0	0	0
Agrococcus baldri	0	0	1	0	0	0	0	0	0	0
Agrococcus jejuensis	0	0	1	0	0	0	0	0	0	0
Agromyces atrinae	0	0	1	0	0	0	0	1	0	0
Albimonas donghaensis	0	0	1	0	0	0	0	0	0	0
Algoriphagus aquaeductus	0	0	1	1	1	0	0	0	0	0
Aliagarivorans marinus	0	0	1	0	0	0	0	0	0	0
Alicycliphilus sp.	0	0	1	0	0	0	0	0	0	0
Alienimonas californiensis	0	0	1	0	1	0	0	0	0	0
Alishewanella agri	0	0	1	0	0	0	0	0	0	0
Alistipes ihumii	0	0	1	0	0	0	0	0	0	0
Alistipes shahii	0	0	1	0	0	0	0	0	0	0
Alkalibacterium olivapovliticus	0	0	1	0	0	0	0	0	0	0
Alkalimonas amylolytica	0	0	1	0	0	0	0	0	0	0
Alphaproteobacteria bacterium HGW-Alphaproteobacteria-3	0	0	1	0	0	0	0	0	0	0
Alphaproteobacteria bacterium RIFCSPHIGHO2_12_FULL_66_14	0	0	1	0	0	0	0	0	0	0
Altererythrobacter sp. BPTF-M16	0	0	1	0	0	0	0	0	0	0
Alteromonas mediterranea	0	0	1	0	0	0	0	0	0	0
Ammoniphilus sp. CFH 90114	0	0	1	0	1	0	0	0	0	0
Anaerococcus prevotii	0	0	1	0	0	0	0	0	0	0
Anaerococcus sp. Marseille-P4512	0	0	1	0	0	0	0	0	0	0
Anaerococcus tetradius	0	0	1	0	0	0	0	0	0	0
Anaeromassilibacillus senegalensis	0	0	1	0	1	0	0	0	0	0
Anaeromicrobium sediminis	0	0	1	0	1	0	0	0	0	0
Anaerostipes hadrus	0	0	1	0	1	0	0	0	0	0
Aquabacterium commune	0	0	1	0	1	0	0	0	0	0
Arachidicoccus ginsenosidivorans	0	0	1	0	1	0	0	0	0	0
Archangium violaceum	0	0	1	0	1	0	0	0	0	0
Arcobacter sp. LMG 29976	0	0	1	0	0	0	0	0	0	0
Arcticibacterium luteifluviistationis	0	0	1	0	1	0	0	0	0	0
Armatimonadetes bacterium	0	0	1	0	1	0	0	0	0	0
Armatimonadetes bacterium CG2_30_59_28	0	0	1	0	0	0	0	0	0	0
Armatimonadetes bacterium OLB18	0	0	1	0	0	0	0	0	0	0
Armatimonadetes bacterium RBG_16_58_9	0	0	1	0	0	0	0	0	0	0
Arsukibacterium sp. MJ3	0	0	1	0	0	0	0	0	0	0
Arthrobacter oryzae	0	0	1	0	0	0	0	0	0	0
Arthrobacter sp. AQ5-05	0	0	1	0	1	0	0	0	0	0
Arthrobacter sp. DWC3	0	0	1	0	0	0	0	0	0	0
Arthrobacter sp. H14	0	0	1	0	1	0	0	0	0	0
Arthrobacter sp. HMSC08H08	0	0	1	0	0	0	0	0	0	0
Arthrobacter sp. NEAU-SA2	0	0	1	0	0	0	0	0	0	0
Arthrobacter sp. OV608	0	0	1	0	0	0	0	0	0	0
Arthrobacter sp. SLBN-100	0	0	1	0	0	0	0	0	0	0
Arthrobacter sp. SLBN-112	0	0	1	0	0	0	0	0	0	0
Arthrobacter sp. SLBN-122	0	0	1	0	0	0	0	0	0	0
Arthrobacter sp. Soil736	0	0	1	0	1	0	0	0	0	0
Arthrobacter sp. Soil761	0	0	1	0	0	0	0	0	0	0
Arthrobacter sp. Soil764	0	0	1	0	0	0	0	0	0	0
Asinibacterium sp. OR53	0	0	1	0	0	1	0	0	0	0
Asticcacaulis excentricus	0	0	1	0	1	0	0	0	0	0
Atopostipes suicloacalis	0	0	1	0	0	0	0	0	0	0
Aureimonas altamirensis	0	0	1	0	1	0	0	0	0	0
Aureimonas sp. AU22	0	0	1	0	0	0	0	0	0	0
Azoarcus olearius	0	0	1	0	1	0	0	0	0	0
Azoarcus sp. CIB	0	0	1	0	0	0	0	0	0	0
Azohydromonas lata	0	0	1	0	1	0	0	0	0	0
Azospirillum sp. K2W22B-5	0	0	1	0	1	0	0	0	0	0
Bacillus abyssalis	0	0	1	0	0	0	0	0	0	0
Bacillus sp. AFS018417	0	0	1	0	0	0	0	0	0	0
Bacteriodetes bacterium	0	0	1	0	1	0	0	0	0	0
Bacteriovorax sp. DB6_IX	0	0	1	0	1	0	0	0	0	0
Bacteroidales bacterium	0	0	1	0	1	0	0	0	0	0
Bacteroides coprocola	0	0	1	0	1	0	0	0	0	0
Bacteroides coprophilus	0	0	1	0	0	0	0	0	0	0
Bacteroides dorei	0	0	1	0	1	0	0	0	0	0
Bacteroides ovatus CAG:22	0	0	1	0	0	0	0	0	0	0
Bacteroides sp. AM16-15	0	0	1	0	1	0	0	0	0	0
Bacteroides sp. HF-5300	0	0	1	0	0	0	0	0	0	0
Bacteroides thetaiotaomicron	0	0	1	0	1	0	0	1	0	0
Bacteroides vulgatus	0	0	1	0	1	0	0	1	0	0
Bacteroides xylanisolvens	0	0	1	0	1	0	0	0	0	0
Bacteroidetes bacterium CG12_big_fil_rev_8_21_14_0_65_60_17	0	0	1	0	1	0	0	0	0	0
Bacteroidetes bacterium CG2_30_33_31	0	0	1	0	1	0	0	0	0	0
Bacteroidetes bacterium GWA2_33_15	0	0	1	0	1	0	0	0	0	0
Bacteroidetes bacterium GWF2_41_31	0	0	1	0	0	0	0	0	0	0
Bacteroidetes bacterium RIFCSPHIGHO2_02_FULL_44_7	0	0	1	0	1	0	0	0	0	0
Bacteroidetes bacterium RIFCSPLOWO2_12_FULL_35_15	0	0	1	0	1	0	0	0	0	0
Barrientosiimonas humi	0	0	1	0	0	0	0	0	0	0
Bdellovibrionales bacterium RBG_16_40_8	0	0	1	0	1	0	0	0	0	0
Beggiatoa sp. PS	0	0	1	0	1	0	0	0	0	0
Beijerinckiaceae bacterium RH AL1	0	0	1	0	1	0	0	0	0	0
Belnapia rosea	0	0	1	0	0	0	0	0	0	0
Bifidobacterium mongoliense	0	0	1	0	0	0	0	0	0	0
Blastococcus sp. CCUG 61487	0	0	1	0	0	0	0	0	0	0
Blastococcus sp. DSM 44205	0	0	1	0	0	0	0	0	0	0
Blastococcus sp. DSM 46838	0	0	1	0	0	0	0	0	0	0
Blastopirellula marina	0	0	1	0	1	0	0	0	0	0
Blastopirellula sp.	0	0	1	0	1	0	0	0	0	0
Blautia obeum	0	0	1	0	1	1	0	0	0	0
Blautia sp. An46	0	0	1	0	0	0	0	0	0	0
Bordetella avium	0	0	1	0	1	0	0	0	0	0
Bordetella sp. FB-8	0	0	1	0	1	0	0	0	0	0
Bosea lupini	0	0	1	0	0	0	0	0	0	0
Bosea sp. AAP35	0	0	1	0	0	0	0	0	0	0
Bosea sp. UNC402CLCol	0	0	1	0	0	0	0	0	0	0
Bowmanella denitrificans	0	0	1	0	0	0	0	0	0	0
Bowmanella sp. JS7-9	0	0	1	0	0	0	0	0	0	0
Brachyspira aalborgi	0	0	1	0	1	0	0	0	0	0
Bradymonas sediminis	0	0	1	0	1	0	0	0	0	0
Bradyrhizobium algeriense	0	0	1	0	1	0	0	0	0	0
Bradyrhizobium diazoefficiens	0	0	1	0	0	0	0	0	0	0
Bradyrhizobium elkanii	0	0	1	0	1	0	0	0	0	0
Bradyrhizobium embrapense	0	0	1	0	0	0	0	0	0	0
Bradyrhizobium jicamae	0	0	1	0	1	0	0	0	0	0
Bradyrhizobium sp. CCH10-C7	0	0	1	0	0	0	0	0	0	0
Bradyrhizobium sp. CCH5-F6	0	0	1	0	1	0	0	0	0	0
Bradyrhizobium sp. DFCI-1	0	0	1	0	0	0	0	0	0	0
Bradyrhizobium sp. LTSP849	0	0	1	0	1	0	0	0	0	0
Bradyrhizobium sp. Leo170	0	0	1	0	1	0	0	0	0	0
Bradyrhizobium sp. S23321	0	0	1	0	0	0	0	0	0	0
Bradyrhizobium sp. th.b2	0	0	1	0	1	0	0	0	0	0
Bradyrhizobium valentinum	0	0	1	0	1	0	0	0	0	0
Bradyrhizobium yuanmingense	0	0	1	0	1	0	0	0	0	0
Brevibacillus parabrevis	0	0	1	0	0	0	0	0	0	0
Brevibacterium luteolum	0	0	1	0	0	0	0	0	0	0
Brevibacterium sp. 239c	0	0	1	0	0	0	0	0	0	0
Brevilactibacter sinopodophylli	0	0	1	0	0	0	0	0	0	0
Brevundimonas sp. 357	0	0	1	0	0	0	0	0	0	0
Brevundimonas sp. GW460-12-10-14-LB2	0	0	1	0	1	0	0	0	0	0
Brevundimonas sp. NS26	0	0	1	0	1	0	0	0	0	0
Brevundimonas sp. ZS04	0	0	1	0	0	0	0	0	0	0
Brevundimonas vesicularis	0	0	1	0	1	0	0	0	0	0
Brochothrix thermosphacta	0	0	1	0	1	0	0	1	0	0
Burkholderia ambifaria	0	0	1	0	1	0	0	0	0	0
Burkholderia cenocepacia	0	0	1	0	1	0	0	0	0	0
Burkholderia pseudomultivorans	0	0	1	0	1	0	0	0	0	0
Burkholderia pyrrocinia	0	0	1	0	1	0	0	0	0	0
Burkholderia sp. KK1	0	0	1	0	1	0	0	0	0	0
Burkholderia sp. Nafp2/4-1b	0	0	1	0	1	0	0	0	0	0
Burkholderia sp. b13	0	0	1	0	0	0	0	0	0	0
Burkholderia sp. yr520	0	0	1	0	0	0	0	0	0	0
Burkholderiales bacterium C2	0	0	1	0	1	0	0	0	0	0
Burkholderiales bacterium PBB4	0	0	1	0	0	0	0	0	0	0
Burkholderiales bacterium RIFOXYC12_FULL_60_6	0	0	1	0	0	0	0	0	0	0
Butyricicoccus sp. 1XD8-22	0	0	1	0	1	0	0	0	0	0
Butyrivibrio sp. XB500-5	0	0	1	0	0	0	0	0	0	0
Caldalkalibacillus thermarum	0	0	1	0	0	0	0	0	0	0
Caldicellulosiruptor kristjanssonii	0	0	1	0	0	0	0	0	0	0
Caldimonas taiwanensis	0	0	1	0	0	0	0	0	0	0
Caldithrix sp.	0	0	1	0	1	0	0	0	0	0
Calditrichaeota bacterium	0	0	1	0	1	0	0	0	0	0
Camelimonas lactis	0	0	1	0	0	0	0	0	0	0
Campylobacter jejuni	0	0	1	0	1	0	0	0	0	0
Candidatus Accumulibacter sp.	0	0	1	0	1	0	0	0	0	0
Candidatus Acetothermia bacterium	0	0	1	0	1	0	0	0	0	0
Candidatus Cloacimonetes bacterium	0	0	1	0	1	0	0	0	0	0
Candidatus Daviesbacteria bacterium GW2011_GWB1_41_5	0	0	1	0	1	0	0	0	0	0
Candidatus Dichloromethanomonas elyunquensis	0	0	1	0	1	0	0	0	0	0
Candidatus Gottesmanbacteria bacterium GW2011_GWA2_47_9	0	0	1	0	1	0	0	0	0	0
Candidatus Gottesmanbacteria bacterium GW2011_GWB1_43_11	0	0	1	0	0	0	0	0	0	0
Candidatus Hydrogenedentes bacterium	0	0	1	0	1	0	0	0	0	0
Candidatus Komeilibacteria bacterium RIFOXYC1_FULL_37_11	0	0	1	0	0	0	0	0	0	0
Candidatus Macondimonas diazotrophica	0	0	1	0	1	0	0	0	0	0
Candidatus Methylomirabilis lanthanidiphila	0	0	1	0	1	0	0	0	0	0
Candidatus Microthrix parvicella	0	0	1	0	0	0	0	0	0	0
Candidatus Raymondbacteria bacterium RifOxyB12_full_50_8	0	0	1	0	0	0	0	0	0	0
Candidatus Rokubacteria bacterium GWA2_73_35	0	0	1	0	0	0	0	0	0	0
Candidatus Saccharibacteria bacterium 32-49-12	0	0	1	0	0	0	0	0	0	0
Candidatus Saccharibacteria bacterium HGW-Saccharibacteria-1	0	0	1	0	1	0	0	1	0	0
Candidatus Saccharimonas sp.	0	0	1	0	1	0	0	0	0	0
Candidatus Sumerlaea chitinovorans	0	0	1	0	0	0	0	0	0	0
Candidatus Woesebacteria bacterium GW2011_GWA1_39_8	0	0	1	0	1	0	0	0	0	0
Candidatus Wolfebacteria bacterium	0	0	1	0	1	0	0	0	0	0
Capnocytophaga sp. H2931	0	0	1	0	0	0	0	0	0	0
Carnobacterium maltaromaticum	0	0	1	0	0	0	0	1	0	0
Catellatospora sp. H14505	0	0	1	0	1	0	0	0	0	0
Catenovulum agarivorans	0	0	1	0	1	0	0	0	0	0
Caulobacter sp. D4A	0	0	1	0	0	0	0	0	0	0
Celeribacter halophilus	0	0	1	0	0	0	0	0	0	0
Celeribacter indicus	0	0	1	0	0	0	0	0	0	0
Celeribacter persicus	0	0	1	0	1	0	0	0	0	0
Cellulomonas flavigena	0	0	1	0	0	0	0	0	0	0
Cellvibrio sp. YR554	0	0	1	0	0	0	0	0	0	0
Cellvibrio sp. pealriver	0	0	1	0	0	0	0	0	0	0
Chachezhania antarctica	0	0	1	0	0	0	0	0	0	0
Changchengzhania lutea	0	0	1	0	0	0	0	0	0	0
Chitinibacter sp. ZOR0017	0	0	1	0	1	0	0	0	0	0
Chitinophaga jiangningensis	0	0	1	0	1	0	0	0	0	0
Chitinophaga parva	0	0	1	0	1	0	0	0	0	0
Chitinophaga polysaccharea	0	0	1	0	1	0	0	0	0	0
Chitinophaga sp. ZY74	0	0	1	0	1	0	0	0	0	0
Chitinophagaceae bacterium BSSC1	0	0	1	1	1	1	0	0	0	0
Chitinophagaceae bacterium PMP191F	0	0	1	0	1	0	0	0	0	0
Chlorobaculum thiosulfatiphilum	0	0	1	0	0	0	0	0	0	0
Chlorobi bacterium	0	0	1	0	1	0	0	0	0	0
Chlorobi bacterium OLB5	0	0	1	0	1	0	0	0	0	0
Chlorobium sp.	0	0	1	0	1	0	0	0	0	0
Chloroflexi bacterium 54-19	0	0	1	0	1	0	0	0	0	0
Chloroflexi bacterium HGW-Chloroflexi-6	0	0	1	0	1	0	0	0	0	0
Chloroflexi bacterium RBG_16_54_11	0	0	1	0	1	0	0	0	0	0
Chondromyces apiculatus	0	0	1	0	1	0	0	0	0	0
Chromatiales bacterium RIFOXYA1_FULL_46_5	0	0	1	0	0	0	0	0	0	0
Chroogloeocystis siderophila	0	0	1	0	0	0	0	0	0	0
Chryseobacterium camelliae	0	0	1	0	0	0	0	0	0	0
Chryseobacterium hagamense	0	0	1	0	1	0	0	0	0	0
Chryseobacterium hispanicum	0	0	1	0	0	0	1	0	0	0
Chryseobacterium humi	0	0	1	0	1	0	0	0	0	0
Chryseobacterium indoltheticum	0	0	1	0	1	0	0	0	0	0
Chryseobacterium joostei	0	0	1	0	0	0	0	0	0	0
Chryseobacterium piscium	0	0	1	0	1	0	0	0	0	0
Chryseobacterium scophthalmum	0	0	1	0	0	0	0	0	0	0
Chryseobacterium sp. 36-9	0	0	1	0	0	0	0	0	0	0
Chryseobacterium sp. F5649	0	0	1	0	0	0	0	0	0	0
Chryseobacterium sp. FF12	0	0	1	0	1	0	0	0	0	0
Chryseobacterium sp. FP211-J200	0	0	1	0	0	0	0	0	0	0
Chryseobacterium sp. Leaf394	0	0	1	0	0	0	0	0	0	0
Chryseobacterium tenax	0	0	1	0	1	0	0	0	0	0
Citreimonas salinaria	0	0	1	0	0	0	0	0	0	0
Citricoccus sp. CH26A	0	0	1	0	0	0	0	1	0	0
Clostridiales bacterium S5-A14a	0	0	1	0	0	0	0	0	0	0
Clostridium cochlearium	0	0	1	0	0	0	0	0	0	0
Clostridium diolis	0	0	1	0	0	0	0	0	0	0
Clostridium perfringens	0	0	1	0	1	0	0	0	0	0
Clostridium scatologenes	0	0	1	0	0	0	0	0	0	0
Clostridium sp. 29_15	0	0	1	0	0	0	0	0	0	0
Clostridium sp. AF20-17LB	0	0	1	0	0	0	0	0	0	0
Clostridium sp. CAG:1193	0	0	1	0	0	0	0	0	0	0
Clostridium sp. CAG:448	0	0	1	0	0	0	0	0	0	0
Clostridium sp. CAG:571	0	0	1	0	0	0	0	0	0	0
Cohnella abietis	0	0	1	0	0	0	0	0	0	0
Coleofasciculus chthonoplastes	0	0	1	0	0	0	0	0	0	0
Colwellia agarivorans	0	0	1	0	0	0	0	0	0	0
Colwellia chukchiensis	0	0	1	0	1	0	0	0	0	0
Comamonadaceae bacterium	0	0	1	0	1	0	0	0	0	0
Comamonadaceae bacterium SCN 68-20	0	0	1	0	1	0	0	0	0	0
Comamonas aquatica	0	0	1	0	1	0	0	0	0	0
Comamonas sp. 26	0	0	1	0	1	0	0	0	0	0
Comamonas thiooxydans	0	0	1	0	1	0	0	0	0	0
Coprobacillus sp. 8_1_38FAA	0	0	1	0	0	0	0	0	0	0
Coraliomargarita sp. TMED73	0	0	1	0	0	0	0	0	0	0
Corticibacter populi	0	0	1	0	1	0	0	0	0	0
Corynebacterium diphtheriae	0	0	1	0	1	0	0	1	0	0
Corynebacterium efficiens	0	0	1	0	1	0	0	0	0	0
Corynebacterium glyciniphilum	0	0	1	0	0	0	0	0	0	0
Corynebacterium humireducens	0	0	1	0	0	0	0	0	0	0
Corynebacterium riegelii	0	0	1	0	1	0	0	0	0	0
Corynebacterium sp. HMSC28B08	0	0	1	0	0	0	0	0	0	0
Corynebacterium sp. KPL1855	0	0	1	0	0	0	0	0	0	0
Corynebacterium sp. KPL1856	0	0	1	0	1	0	0	0	0	0
Corynebacterium variabile	0	0	1	0	0	0	0	0	0	0
Couchioplanes caeruleus	0	0	1	0	0	0	0	0	0	0
Croceicoccus sediminis	0	0	1	0	0	0	0	0	0	0
Crocinitomix sp. MedPE-SWsnd	0	0	1	0	1	0	0	0	0	0
Cupriavidus necator	0	0	1	0	1	0	0	0	0	0
Cupriavidus sp. 2SB	0	0	1	0	1	0	0	0	0	0
Cupriavidus sp. USMAHM13	0	0	1	0	0	0	0	0	0	0
Cupriavidus sp. UYMMa02A	0	0	1	0	0	0	0	0	0	0
Cupriavidus sp. WS	0	0	1	0	1	0	0	0	0	0
Curtobacterium sp. MCBD17_008	0	0	1	0	0	0	0	1	0	0
Curvibacter delicatus	0	0	1	0	0	0	0	0	0	0
Curvibacter lanceolatus	0	0	1	0	1	0	0	0	0	0
Curvibacter sp.	0	0	1	0	1	0	0	0	0	0
Cutibacterium granulosum	0	0	1	0	1	0	0	0	0	0
Cyanobacteria bacterium J149	0	0	1	0	1	0	0	0	0	0
Cyanobium sp.	0	0	1	0	1	0	0	0	0	0
Cyclobacterium qasimii	0	0	1	0	1	0	0	0	0	0
Cytophaga hutchinsonii	0	0	1	0	1	0	0	0	0	0
Dechloromonas agitata	0	0	1	0	0	0	0	0	0	0
Dechloromonas aromatica	0	0	1	0	0	0	0	0	0	0
Dechloromonas denitrificans	0	0	1	0	1	0	0	0	0	0
Dechlorosoma suillum	0	0	1	0	1	0	0	0	0	0
Deinococcus cellulosilyticus	0	0	1	0	1	0	0	0	0	0
Deinococcus frigens	0	0	1	0	0	0	0	0	0	0
Deinococcus gobiensis	0	0	1	0	0	0	0	0	0	0
Deinococcus hopiensis	0	0	1	0	1	0	0	1	0	0
Deinococcus indicus	0	0	1	0	0	0	0	0	0	0
Deinococcus marmoris	0	0	1	0	1	0	0	1	0	0
Deinococcus metallilatus	0	0	1	0	1	0	0	1	0	0
Deinococcus phoenicis	0	0	1	0	0	0	0	1	0	0
Deinococcus radiophilus	0	0	1	0	1	0	0	0	0	0
Deinococcus sp. RM	0	0	1	0	1	0	0	0	0	0
Deinococcus sp. UR1	0	0	1	0	1	0	0	0	0	0
Deinococcus wulumuqiensis	0	0	1	0	1	0	0	0	0	0
Delftia sp. RIT313	0	0	1	0	1	0	0	0	0	0
Deltaproteobacteria bacterium CG2_30_63_29	0	0	1	0	1	0	0	0	0	0
Deltaproteobacteria bacterium HGW-Deltaproteobacteria-20	0	0	1	0	1	0	0	0	0	0
Demequina globuliformis	0	0	1	0	0	0	0	0	0	0
Desulfallas arcticus	0	0	1	0	1	0	0	0	0	0
Desulfobacter hydrogenophilus	0	0	1	0	1	0	0	0	0	0
Desulfobacteraceae bacterium 4572_123	0	0	1	0	0	0	0	0	0	0
Desulfosporosinus sp. FKA	0	0	1	0	1	0	0	0	0	0
Desulfovibrio bizertensis	0	0	1	0	1	0	0	0	0	0
Desulfovibrio fructosivorans	0	0	1	0	1	0	0	0	0	0
Desulfovibrio piger	0	0	1	0	1	0	0	0	0	0
Desulfovibrio sp. HK-II	0	0	1	0	0	0	0	0	0	0
Devosia psychrophila	0	0	1	0	0	0	0	0	0	0
Devosia sp. CM5-1	0	0	1	0	0	0	0	0	0	0
Dialister succinatiphilus	0	0	1	0	0	0	0	0	0	0
Dietzia natronolimnaea	0	0	1	0	0	0	0	0	0	0
Dietzia psychralcaliphila	0	0	1	0	1	0	0	0	0	0
Dietzia sp. WMMA184	0	0	1	0	0	0	0	0	0	0
Dinghuibacter silviterrae	0	0	1	0	1	0	0	0	0	0
Dokdonella koreensis	0	0	1	0	0	0	0	0	0	0
Duganella phyllosphaerae	0	0	1	0	1	0	0	0	0	0
Duganella sp. Leaf61	0	0	1	0	0	0	0	0	0	0
Duganella zoogloeoides	0	0	1	0	0	0	0	0	0	0
Dyadobacter beijingensis	0	0	1	0	1	0	0	0	0	0
Dyadobacter sp. AR-3-6	0	0	1	0	0	0	0	0	0	0
Dysgonomonas massiliensis	0	0	1	0	1	0	0	0	0	0
Dysgonomonas sp. HGC4	0	0	1	0	1	0	0	0	0	0
Edaphobacter dinghuensis	0	0	1	0	1	0	0	0	0	0
Eggerthella timonensis	0	0	1	0	0	0	0	0	0	0
Elusimicrobia bacterium RIFOXYA2_FULL_39_19	0	0	1	0	0	0	0	0	0	0
Enorma timonensis	0	0	1	0	0	0	0	0	0	0
Enterobacter cloacae complex sp. 2DZ2F2B	0	0	1	0	0	0	0	0	0	0
Enterobacter cloacae complex sp. GF14B	0	0	1	0	0	0	0	0	0	0
Enterococcus saccharolyticus	0	0	1	0	0	0	0	0	0	0
Eubacterium sp. CAG:38	0	0	1	0	0	0	0	0	0	0
Exiguobacterium sp. HVEsp1	0	0	1	0	0	0	0	0	0	0
Facklamia hominis	0	0	1	0	1	0	0	0	0	0
Fastidiosibacter lacustris	0	0	1	0	1	0	0	0	0	0
Fibrobacter sp. UWH4	0	0	1	0	1	0	0	0	0	0
Fibrobacter sp. UWP2	0	0	1	0	0	0	0	0	0	0
Filimonas endophytica	0	0	1	0	1	0	0	0	0	0
Firmicutes bacterium HGW-Firmicutes-7	0	0	1	0	1	0	0	0	0	0
Fischerella thermalis	0	0	1	0	1	0	0	0	0	0
Flaviaesturariibacter sp. 17J68-15	0	0	1	0	1	0	0	0	0	0
Flavihumibacter petaseus	0	0	1	0	1	0	0	0	0	0
Flavobacteria bacterium GWF1_32_7	0	0	1	0	0	0	0	0	0	0
Flavobacteriales bacterium 32-34-25	0	0	1	0	1	0	0	0	0	0
Flavobacteriales bacterium BRH_c54	0	0	1	0	0	0	0	0	0	0
Flavobacterium anhuiense	0	0	1	0	0	0	0	1	0	0
Flavobacterium croceum	0	0	1	0	1	0	0	0	0	0
Flavobacterium crocinum	0	0	1	0	0	0	0	0	0	0
Flavobacterium flevense	0	0	1	0	1	0	0	0	0	0
Flavobacterium gelidilacus	0	0	1	0	0	0	0	0	0	0
Flavobacterium glaciei	0	0	1	0	0	0	0	0	0	0
Flavobacterium johnsoniae	0	0	1	0	1	0	0	0	0	0
Flavobacterium lindanitolerans	0	0	1	0	0	0	0	0	0	0
Flavobacterium macacae	0	0	1	0	1	0	0	0	0	0
Flavobacterium saccharophilum	0	0	1	0	0	0	0	0	0	0
Flavobacterium sasangense	0	0	1	0	1	0	0	0	0	0
Flavobacterium sharifuzzamanii	0	0	1	0	1	0	0	0	0	0
Flavobacterium sp. AG291	0	0	1	0	1	0	0	0	0	0
Flavobacterium sp. BBQ-12	0	0	1	0	0	0	0	0	0	0
Flavobacterium sp. GSA192	0	0	1	0	0	0	0	0	0	0
Flavobacterium sp. LB3P56	0	0	1	0	1	0	0	0	0	0
Flavobacterium sp. Root420	0	0	1	0	0	0	0	0	0	0
Flavobacterium sp. S87F.05.LMB.W.Kidney.N	0	0	1	0	0	0	0	0	0	0
Flavobacterium succinicans	0	0	1	0	1	0	0	0	0	0
Flectobacillus sp. BAB-3569	0	0	1	0	1	0	0	0	0	0
Frankia discariae	0	0	1	0	1	0	0	1	0	0
Frankiales bacterium	0	0	1	0	0	0	0	0	0	0
Frederiksenia canicola	0	0	1	0	0	0	0	0	0	0
Frigoribacterium faeni	0	0	1	0	0	0	0	0	0	0
Frigoribacterium sp. Leaf164	0	0	1	0	0	0	0	1	0	0
Frigoribacterium sp. PhB24	0	0	1	0	0	0	0	0	0	0
Fuerstia marisgermanicae	0	0	1	0	1	0	0	0	0	0
Gallibacterium anatis	0	0	1	0	1	0	0	0	0	0
Gammaproteobacteria bacterium RIFCSPLOWO2_01_FULL_47_190	0	0	1	0	0	0	0	0	0	0
Gammaproteobacteria bacterium RIFCSPLOWO2_02_FULL_38_11	0	0	1	0	0	0	0	0	0	0
Gammaproteobacteria bacterium RIFCSPLOWO2_02_FULL_61_13	0	0	1	0	1	0	0	0	0	0
Gammaproteobacteria bacterium RIFOXYD12_FULL_61_37	0	0	1	0	1	0	0	0	0	0
Gemmataceae bacterium	0	0	1	0	1	0	0	0	0	0
Gemmatimonadetes bacterium 13_1_40CM_4_69_8	0	0	1	0	0	0	0	0	0	0
Gemmatimonas phototrophica	0	0	1	0	1	0	0	0	0	0
Gemmobacter intermedius	0	0	1	0	0	0	0	0	0	0
Geodermatophilus dictyosporus	0	0	1	0	0	0	0	0	0	0
Geodermatophilus siccatus	0	0	1	0	1	0	0	0	0	0
Geodermatophilus sp. DSM 44511	0	0	1	0	1	0	0	0	0	0
Geomonas soli	0	0	1	0	0	0	0	0	0	0
Gillisia limnaea	0	0	1	0	0	0	0	0	0	0
Glaciibacter sp. YIM 131861	0	0	1	0	0	0	0	1	0	0
Gordonia aichiensis	0	0	1	0	0	0	0	0	0	0
Gordonia lacunae	0	0	1	0	0	0	0	0	0	0
Gordonia paraffinivorans	0	0	1	0	0	0	0	0	0	0
Gordonia sp. HS-NH1	0	0	1	0	1	0	0	0	0	0
Gracilibacillus phocaeensis	0	0	1	0	1	0	0	0	0	0
Granulibacter bethesdensis	0	0	1	0	1	0	0	0	0	0
Granulicatella elegans	0	0	1	0	0	0	0	0	0	0
Granulicatella sp. HMSC31F03	0	0	1	0	0	0	0	0	0	0
Granulicella sp. GAS466	0	0	1	0	1	0	0	0	0	0
Haemophilus haemolyticus	0	0	1	0	0	0	0	0	0	0
Haemophilus parainfluenzae	0	0	1	0	0	0	0	0	0	0
Hafnia alvei	0	0	1	0	1	0	0	0	0	0
Hafnia paralvei	0	0	1	0	1	0	0	0	0	0
Halomonas beimenensis	0	0	1	0	1	0	0	0	0	0
Halomonas chromatireducens	0	0	1	0	0	0	0	0	0	0
Halomonas desiderata	0	0	1	0	1	0	0	0	0	0
Halomonas muralis	0	0	1	0	0	0	0	0	0	0
Halomonas salina	0	0	1	0	0	0	0	0	0	0
Halomonas sp. 204	0	0	1	0	0	0	0	0	0	0
Halomonas xinjiangensis	0	0	1	0	0	0	0	0	0	0
Hephaestia caeni	0	0	1	0	1	0	0	0	0	0
Herbaspirillum lusitanum	0	0	1	0	1	0	0	0	0	0
Herbaspirillum sp. K1R23-30	0	0	1	0	0	0	0	0	0	0
Herbiconiux solani	0	0	1	0	1	0	0	1	0	0
Herbiconiux sp.	0	0	1	0	1	0	0	0	0	0
Herpetosiphon aurantiacus	0	0	1	0	1	0	0	0	0	0
Hydrogenophaga sp. RAC07	0	0	1	0	0	0	0	0	0	0
Hydrogenophaga sp. Root209	0	0	1	0	1	0	0	0	0	0
Hydrogenophaga taeniospiralis	0	0	1	0	0	0	0	0	0	0
Hydrogenophilales bacterium 17-64-34	0	0	1	0	0	0	0	0	0	0
Hydrogenophilus thermoluteolus	0	0	1	0	0	0	0	1	0	0
Hymenobacter coccineus	0	0	1	0	1	0	0	0	0	0
Hymenobacter daecheongensis	0	0	1	0	1	0	0	0	0	0
Hymenobacter perfusus	0	0	1	0	0	0	0	0	0	0
Hymenobacter sp.	0	0	1	0	1	0	0	0	0	0
Hymenobacter sp. DG01	0	0	1	0	1	0	0	0	0	0
Hyphomicrobium facile	0	0	1	0	0	0	0	0	0	0
Hyphomicrobium nitrativorans	0	0	1	0	0	0	0	0	0	0
Hyphomicrobium sp.	0	0	1	0	1	0	0	0	0	0
Hyphomicrobium sp. 12-62-95	0	0	1	0	1	0	0	0	0	0
Hyphomicrobium sp. 802	0	0	1	0	0	0	0	0	0	0
Hyphomicrobium sp. CS1BSMeth3	0	0	1	0	1	0	0	0	0	0
Hyphomicrobium sp. CS1GBMeth3	0	0	1	0	1	0	0	0	0	0
Hyphomicrobium sp. NDB2Meth4	0	0	1	0	1	0	0	0	0	0
Hyphomicrobium sulfonivorans	0	0	1	0	1	0	0	0	0	0
Hyphomonas oceanitis	0	0	1	0	0	0	0	0	0	0
Hyphomonas sp. CY54-11-8	0	0	1	0	0	0	0	0	0	0
Hyphomonas sp. Mor2	0	0	1	0	1	0	0	0	0	0
Ideonella azotifigens	0	0	1	0	1	0	0	0	0	0
Ignavibacteria bacterium GWA2_55_11	0	0	1	0	0	0	0	0	0	0
Ignavibacteria bacterium GWC2_56_12	0	0	1	0	1	0	0	0	0	0
Ignavibacteria bacterium RIFOXYB2_FULL_37_11	0	0	1	0	1	0	0	0	0	0
Ignavibacteriae bacterium	0	0	1	0	1	0	0	0	0	0
Ignavibacteriae bacterium HGW-Ignavibacteriae-4	0	0	1	0	0	0	0	0	0	0
Iodobacter fluviatilis	0	0	1	0	0	0	0	0	0	0
Jannaschia aquimarina	0	0	1	0	0	0	0	0	0	0
Janthinobacterium agaricidamnosum	0	0	1	0	1	0	0	0	0	0
Janthinobacterium psychrotolerans	0	0	1	0	1	0	0	0	0	0
Janthinobacterium sp. BJB446	0	0	1	0	0	0	0	0	0	0
Jeotgalibaca sp. PTS2502	0	0	1	0	0	0	0	0	0	0
Jeotgalibacillus alimentarius	0	0	1	0	0	0	0	0	0	0
Kiloniella laminariae	0	0	1	0	0	0	0	0	0	0
Kineosporia sp. R_H_3	0	0	1	0	0	0	0	0	0	0
Kinneretia asaccharophila	0	0	1	0	0	0	0	0	0	0
Kiritimatiellales bacterium	0	0	1	0	1	0	0	0	0	0
Klebsiella aerogenes	0	0	1	0	1	0	0	0	0	0
Klebsiella quasipneumoniae	0	0	1	0	1	0	0	0	0	0
Klenkia marina	0	0	1	0	1	0	0	0	0	0
Kluyvera intermedia	0	0	1	0	0	0	0	0	0	0
Kocuria halotolerans	0	0	1	0	1	0	0	0	0	0
Kocuria rosea	0	0	1	0	0	0	0	1	0	0
Kocuria sp. CNJ-770	0	0	1	0	0	0	0	0	0	0
Kocuria sp. ICS0012	0	0	1	0	0	0	0	1	0	0
Kocuria sp. M5W7-7	0	0	1	0	1	0	0	0	0	0
Kocuria sp. WRN011	0	0	1	0	0	0	0	0	0	0
Kouleothrix aurantiaca	0	0	1	0	1	0	0	0	0	0
Kribbella sp. VKM Ac-2573	0	0	1	0	0	0	0	0	0	0
Kribbella sp. YM55	0	0	1	0	0	0	0	0	0	0
Ktedonobacter racemifer	0	0	1	0	1	0	0	0	0	0
Ktedonosporobacter rubrisoli	0	0	1	0	1	0	0	0	0	0
Kurthia senegalensis	0	0	1	0	0	0	0	0	0	0
Labrenzia sp. OB1	0	0	1	0	0	0	0	0	0	0
Lachnoclostridium sp. An14	0	0	1	0	1	0	0	0	0	0
Lachnospiraceae bacterium GAM79	0	0	1	0	0	0	0	0	0	0
Lachnospiraceae bacterium RM5	0	0	1	0	0	0	0	0	0	0
Lachnotalea glycerini	0	0	1	0	1	0	0	0	0	0
Lacibacter cauensis	0	0	1	0	1	0	0	0	0	0
Lacimicrobium alkaliphilum	0	0	1	0	0	0	0	0	0	0
Lacinutrix sp. Hel_I_90	0	0	1	0	0	0	0	0	0	0
Lacisediminihabitans profunda	0	0	1	0	0	0	0	0	0	0
Lactobacillus acidophilus	0	0	1	0	1	0	0	0	0	0
Lactobacillus bambusae	0	0	1	0	0	0	0	0	0	0
Lactobacillus mucosae	0	0	1	0	1	0	0	0	0	0
Lactobacillus rhamnosus	0	0	1	0	1	0	0	0	0	0
Lactobacillus sp. CBA3605	0	0	1	0	0	0	0	0	0	0
Lactococcus raffinolactis	0	0	1	0	1	0	0	0	0	0
Lautropia sp. SCN 66-9	0	0	1	0	1	0	0	0	0	0
Leclercia adecarboxylata	0	0	1	0	1	0	0	0	0	0
Legionella pneumophila	0	0	1	0	1	0	0	0	0	0
Legionella saoudiensis	0	0	1	0	0	0	0	0	0	0
Leifsonia aquatica	0	0	1	0	1	0	0	1	0	0
Leifsonia sp. Leaf336	0	0	1	0	1	0	0	0	0	0
Leifsonia sp. ku-ls	0	0	1	0	0	0	0	0	0	0
Leifsonia xyli	0	0	1	0	1	0	0	1	0	0
Lentzea aerocolonigenes	0	0	1	0	1	0	0	0	0	0
Lentzea sp. FXJ1.1311	0	0	1	0	0	0	0	0	0	0
Leptospira broomii	0	0	1	0	0	0	0	0	0	0
Leptothrix mobilis	0	0	1	0	1	0	0	0	0	0
Leptotrichia buccalis	0	0	1	0	0	0	0	0	0	0
Leucobacter triazinivorans	0	0	1	0	0	0	0	0	0	0
Leucothrix sp. C3212	0	0	1	0	0	0	0	0	0	0
Lewinella persica	0	0	1	0	1	0	0	0	0	0
Lichenibacterium ramalinae	0	0	1	0	0	0	0	0	0	0
Limnohabitans sp. Hippo3	0	0	1	0	0	0	0	0	0	0
Loktanella fryxellensis	0	0	1	0	0	0	0	0	0	0
Luteibacter rhizovicinus	0	0	1	0	1	0	0	0	0	0
Luteibacter sp. 329MFSha	0	0	1	0	0	0	0	0	0	0
Luteibacter sp. 9133	0	0	1	0	0	0	0	0	0	0
Luteibacter sp. 9135	0	0	1	0	1	0	0	0	0	0
Luteibacter sp. UNCMF366Tsu5.1	0	0	1	0	1	0	0	0	0	0
Luteimonas sp. XBU10	0	0	1	0	0	0	0	0	0	0
Lutibacter sp. SM1352	0	0	1	0	0	0	0	0	0	0
Lysobacter antibioticus	0	0	1	0	1	0	0	0	0	0
Lysobacter sp. 17J7-1	0	0	1	0	1	0	0	0	0	0
Macellibacteroides sp. HH-ZS	0	0	1	0	1	0	0	0	0	0
Macromonas sp. BK-30	0	0	1	0	1	0	0	0	0	0
Magnetospirillum gryphiswaldense	0	0	1	0	1	0	0	0	0	0
Mangrovimonas sp. DI 80	0	0	1	0	1	0	0	0	0	0
Maricaulis maris	0	0	1	0	1	0	0	0	0	0
Marimonas lutisali	0	0	1	0	1	0	0	0	0	0
Mariniblastus fucicola	0	0	1	0	1	0	0	0	0	0
Marinicauda algicola	0	0	1	0	0	0	0	0	0	0
Marinilabiliaceae bacterium JC017	0	0	1	0	1	0	0	0	0	0
Marinobacterium stanieri	0	0	1	0	0	0	0	0	0	0
Marinomonas pollencensis	0	0	1	0	1	0	0	0	0	0
Marinomonas sp. HB171799	0	0	1	0	1	0	0	0	0	0
Marinomonas ushuaiensis	0	0	1	0	0	0	0	0	0	0
Marmoricola sp. 4Q3S-7	0	0	1	0	0	0	0	0	0	0
Massilia alkalitolerans	0	0	1	0	1	0	0	0	0	0
Massilia sp. HP4	0	0	1	0	1	0	0	0	0	0
Massilia sp. Leaf139	0	0	1	0	1	0	0	0	0	0
Massilia yuzhufengensis	0	0	1	0	1	0	0	0	0	0
Meiothermus roseus	0	0	1	0	0	0	0	0	0	0
Melioribacter roseus	0	0	1	0	0	0	0	0	0	0
Mesorhizobium sp. SCN 65-12	0	0	1	0	1	0	0	0	0	0
Methylibium sp. NZG	0	0	1	0	1	0	0	0	0	0
Methylibium sp. Root1272	0	0	1	0	0	0	0	0	0	0
Methylibium sp. T29	0	0	1	0	1	0	0	0	0	0
Methylobacterium durans	0	0	1	0	0	0	0	0	0	0
Methylobacterium nodulans	0	0	1	0	1	0	0	0	0	0
Methylobacterium platani	0	0	1	0	1	0	0	0	0	0
Methylobacterium sp. 10	0	0	1	0	0	0	0	0	0	0
Methylobacterium sp. 6HR-1	0	0	1	0	1	0	0	0	0	0
Methylobacterium sp. GV104	0	0	1	0	0	0	0	0	0	0
Methylobacterium sp. GXS13	0	0	1	0	0	0	0	0	0	0
Methylobacterium sp. Leaf104	0	0	1	0	0	0	0	0	0	0
Methylobacterium sp. Leaf108	0	0	1	0	1	0	0	0	0	0
Methylobacterium sp. Leaf113	0	0	1	0	0	0	0	0	0	0
Methylobacterium sp. Leaf117	0	0	1	0	0	0	0	0	0	0
Methylobacterium sp. Leaf89	0	0	1	0	0	0	0	0	0	0
Methylobacterium sp. Leaf92	0	0	1	0	0	0	0	0	0	0
Methylobacterium sp. WL120	0	0	1	0	0	0	0	0	0	0
Methylobacterium sp. WL8	0	0	1	0	0	0	0	0	0	0
Methylobacterium variabile	0	0	1	0	1	0	0	0	0	0
Methylococcaceae bacterium HT3	0	0	1	0	0	0	0	0	0	0
Methylomonas lenta	0	0	1	0	0	0	0	0	0	0
Methylomonas sp. DH-1	0	0	1	0	1	0	0	0	0	0
Methylophaga sulfidovorans	0	0	1	0	0	0	0	0	0	0
Methylophaga thiooxydans	0	0	1	0	0	0	0	0	0	0
Methylotenera versatilis	0	0	1	0	1	0	0	0	0	0
Methyloterricola oryzae	0	0	1	0	0	0	0	0	0	0
Methyloversatilis universalis	0	0	1	0	1	0	0	0	0	0
Micavibrio aeruginosavorus	0	0	1	0	1	0	0	0	0	0
Microbacterium hominis	0	0	1	0	1	0	0	1	0	0
Microbacterium maritypicum	0	0	1	0	1	0	0	0	0	0
Microbacterium sp. BR1	0	0	1	0	0	0	0	0	0	0
Microbacterium sp. Root180	0	0	1	0	0	0	0	0	0	0
Microbacterium sp. TNHR37B	0	0	1	0	0	0	0	1	0	0
Microcystis flos-aquae	0	0	1	0	1	0	0	0	0	0
Micromonospora lupini	0	0	1	0	0	0	0	0	0	0
Micromonospora nigra	0	0	1	0	0	0	0	0	0	0
Micromonospora sp. 4G51	0	0	1	0	1	0	0	0	0	0
Micromonospora sp. KC606	0	0	1	0	0	0	0	0	0	0
Micromonospora viridifaciens	0	0	1	0	0	0	0	0	0	0
Micropruina glycogenica	0	0	1	0	1	0	0	0	0	0
Microvirga pakistanensis	0	0	1	0	0	0	0	0	0	0
Microvirga sp. KLBC 81	0	0	1	0	1	0	0	0	0	0
Mitsuaria sp. PDC51	0	0	1	0	0	0	0	0	0	0
Modestobacter sp. Leaf380	0	0	1	0	0	0	0	0	0	0
Moraxella canis	0	0	1	0	1	0	0	0	0	0
Moraxella lincolnii	0	0	1	0	1	0	0	0	0	0
Moraxellaceae bacterium HYN0046	0	0	1	0	1	0	0	0	0	0
Mucilaginibacter frigoritolerans	0	0	1	0	0	0	0	0	0	0
Mucilaginibacter paludis	0	0	1	0	1	0	0	0	0	0
Mucilaginibacter pedocola	0	0	1	0	1	0	0	0	0	0
Mucilaginibacter psychrotolerans	0	0	1	0	1	0	0	0	0	0
Mucilaginibacter sp.	0	0	1	0	1	0	0	0	0	0
Mucilaginibacter sp. HYN0043	0	0	1	0	1	0	0	0	0	0
Mucilaginibacter xinganensis	0	0	1	0	1	0	0	0	0	0
Murimonas intestini	0	0	1	0	1	0	0	0	0	0
Mycobacterium grossiae	0	0	1	0	0	0	0	0	0	0
Mycobacterium sp. 852002-10029_SCH5224772	0	0	1	0	0	0	0	0	0	0
Mycobacterium sp. AT1	0	0	1	0	1	0	0	0	0	0
Mycobacterium sp. UNC280MFTsu5.1	0	0	1	0	0	0	0	0	0	0
Mycolicibacterium sp. GF69	0	0	1	0	0	0	0	0	0	0
Mycoplasma sp. CAG:877	0	0	1	0	0	0	0	0	0	0
Myxococcaceae bacterium	0	0	1	0	1	0	0	0	0	0
Myxococcales bacterium	0	0	1	0	1	0	0	0	0	0
Myxococcus stipitatus	0	0	1	0	0	0	0	0	0	0
Nafulsella turpanensis	0	0	1	0	0	0	0	0	0	0
Naumannella halotolerans	0	0	1	0	1	0	1	0	0	0
Neisseria animalis	0	0	1	0	1	0	0	0	0	0
Neisseria canis	0	0	1	0	0	0	0	0	0	0
Neisseria gonorrhoeae	0	0	1	0	1	0	0	0	0	0
Neisseria meningitidis	0	0	1	0	1	0	0	0	0	0
Neisseriaceae bacterium DSM 100970	0	0	1	0	1	0	0	0	0	0
Neptuniibacter marinus	0	0	1	0	1	0	0	0	0	0
Nevskia ramosa	0	0	1	0	1	0	0	0	0	0
Nitrospira bacterium SG8_35_1	0	0	1	0	0	0	0	0	0	0
Nitrospira defluvii	0	0	1	0	1	0	0	0	0	0
Nitrospira japonica	0	0	1	0	1	0	0	0	0	0
Niveispirillum cyanobacteriorum	0	0	1	0	1	0	0	0	0	0
Niveispirillum irakense	0	0	1	0	0	0	0	0	0	0
Nocardia puris	0	0	1	0	0	0	0	0	0	0
Nocardioides sp. 130	0	0	1	0	0	0	0	0	0	0
Nocardioides sp. 503	0	0	1	0	1	0	0	1	0	0
Nocardioides sp. 616	0	0	1	0	0	0	0	0	0	0
Nocardioides sp. Iso805N	0	0	1	0	0	0	0	0	0	0
Nocardioides sp. URHA0020	0	0	1	0	0	0	0	0	0	0
Nocardioides sp. URHA0032	0	0	1	0	1	0	0	0	0	0
Nonomuraea indica	0	0	1	0	0	0	0	0	0	0
Nonomuraea maritima	0	0	1	0	1	0	0	0	0	0
Nonomuraea wenchangensis	0	0	1	0	1	0	0	0	0	0
Noviherbaspirillum sp. Root189	0	0	1	0	1	0	0	0	0	0
Ohtaekwangia koreensis	0	0	1	0	1	0	0	0	0	0
Opitutae bacterium AMD-G1	0	0	1	0	1	0	0	0	0	0
Oribacterium sp. P6A1	0	0	1	0	1	0	0	0	0	0
Oscillatoriales cyanobacterium	0	0	1	0	1	0	0	0	0	0
Oxalobacteraceae bacterium OM1	0	0	1	0	1	0	0	0	0	0
Paenibacillaceae bacterium JTherm	0	0	1	0	1	0	0	0	0	0
Paenibacillus contaminans	0	0	1	0	1	0	0	0	0	0
Paenibacillus daejeonensis	0	0	1	0	1	0	0	0	0	0
Paenibacillus ehimensis	0	0	1	0	0	0	0	0	0	0
Paenibacillus glacialis	0	0	1	0	0	0	0	0	0	0
Paenibacillus harenae	0	0	1	0	1	0	0	0	0	0
Paenibacillus illinoisensis	0	0	1	0	1	0	0	0	0	0
Paenibacillus larvae	0	0	1	0	0	0	0	1	0	0
Paenibacillus mesophilus	0	0	1	0	0	0	0	0	0	0
Paenibacillus sp. OSY-SE	0	0	1	0	1	0	0	0	0	0
Paenibacillus sp. OV191	0	0	1	0	0	0	0	0	0	0
Panacagrimonas perspica	0	0	1	0	1	0	0	0	0	0
Panacibacter ginsenosidivorans	0	0	1	0	1	0	0	0	0	0
Pantoea agglomerans	0	0	1	0	0	0	0	0	0	0
Pantoea anthophila	0	0	1	0	0	0	0	0	0	0
Pantoea dispersa	0	0	1	0	1	0	0	0	0	0
Pantoea stewartii	0	0	1	0	1	0	0	0	0	0
Parabacteroides merdae	0	0	1	0	1	1	0	0	0	0
Paraburkholderia caribensis	0	0	1	0	1	0	0	0	0	0
Paraburkholderia mimosarum	0	0	1	0	1	0	0	0	0	0
Parachlamydia acanthamoebae	0	0	1	0	1	0	0	0	0	0
Paracoccus chinensis	0	0	1	0	1	0	0	0	0	0
Paracoccus denitrificans	0	0	1	0	1	0	0	0	0	0
Paracoccus sp. BP8	0	0	1	0	0	0	0	0	0	0
Paracoccus sp. I-41R45	0	0	1	0	0	0	0	0	0	0
Paracoccus sp. MKU1	0	0	1	0	1	0	0	0	0	0
Paracoccus subflavus	0	0	1	0	1	0	0	0	0	0
Paracoccus versutus	0	0	1	0	0	0	0	0	0	0
Paraferrimonas sedimenticola	0	0	1	0	1	0	0	0	0	0
Parafilimonas terrae	0	0	1	0	1	0	0	0	0	0
Paraliobacillus sp. PM-2	0	0	1	0	0	0	0	0	0	0
Pararheinheimera mesophila	0	0	1	0	0	0	0	0	0	0
Pararheinheimera tangshanensis	0	0	1	0	0	0	0	0	0	0
Pararheinheimera texasensis	0	0	1	0	1	0	0	0	0	0
Parcubacteria group bacterium GW2011_GWC1_41_7	0	0	1	0	0	0	0	0	0	0
Patescibacteria group bacterium	0	0	1	0	1	0	0	0	0	0
Paucibacter toxinivorans	0	0	1	0	0	0	0	0	0	0
Pedobacter chitinilyticus	0	0	1	0	0	0	0	0	0	0
Pedobacter duraquae	0	0	1	0	1	0	0	0	0	0
Pedobacter oryzae	0	0	1	0	1	0	0	0	0	0
Pedobacter paludis	0	0	1	0	1	0	0	0	0	0
Pedobacter sp.	0	0	1	0	1	0	0	1	0	0
Pedobacter sp. AR-2-6	0	0	1	0	1	0	0	0	0	0
Pedobacter sp. PACM 27299	0	0	1	0	1	0	0	0	0	0
Pedobacter yonginense	0	0	1	0	1	0	0	0	0	0
Pelagivirga sediminicola	0	0	1	0	0	0	0	0	0	0
Pelomonas sp.	0	0	1	0	1	0	0	0	0	0
Pelomonas sp. Root405	0	0	1	0	0	0	0	0	0	0
Pelosinus propionicus	0	0	1	0	1	0	0	0	0	0
Pelotomaculum sp. PtaB.Bin104	0	0	1	0	1	0	0	0	0	0
Peptococcaceae bacterium 1109	0	0	1	0	1	0	0	0	0	0
Peptoniphilus duerdenii	0	0	1	0	0	0	0	0	0	0
Phaeodactylibacter xiamenensis	0	0	1	0	1	0	0	0	0	0
Phenylobacterium immobile	0	0	1	0	1	0	0	0	0	0
Photobacterium ganghwense	0	0	1	0	1	0	0	0	0	0
Photobacterium kishitanii	0	0	1	0	1	0	0	0	0	0
Photobacterium leiognathi	0	0	1	0	1	0	0	0	0	0
Phreatobacter stygius	0	0	1	0	1	0	0	0	0	0
Phyllobacterium myrsinacearum	0	0	1	0	0	0	0	0	0	0
Pigmentiphaga sp. H8	0	0	1	0	0	0	0	0	0	0
Pirellula sp. SH-Sr6A	0	0	1	0	1	0	0	0	0	0
Planctomycetes bacterium ETA_A1	0	0	1	0	1	0	0	0	0	0
Planctomycetes bacterium KS4	0	0	1	0	1	0	0	0	0	0
Planctomycetes bacterium Pla100	0	0	1	0	1	0	0	0	0	0
Planctomycetes bacterium RBG_16_64_12	0	0	1	0	1	0	0	0	0	0
Planctomycetia bacterium	0	0	1	0	1	0	0	0	0	0
Polaribacter sp. BM10	0	0	1	0	0	0	0	0	0	0
Polaromonas sp.	0	0	1	0	0	0	0	0	0	0
Polaromonas sp. 35-63-240	0	0	1	0	0	0	0	0	0	0
Polaromonas sp. 35-63-35	0	0	1	0	1	0	0	0	0	0
Polaromonas sp. CG9_12	0	0	1	0	1	0	0	0	0	0
Pontibacter ummariensis	0	0	1	0	1	0	0	0	0	0
Porphyrobacter donghaensis	0	0	1	0	0	0	0	0	0	0
Porphyromonas catoniae	0	0	1	0	0	0	0	0	0	0
Porphyromonas gingivicanis	0	0	1	0	0	0	0	0	0	0
Porphyromonas somerae	0	0	1	0	1	0	0	0	0	0
Porphyromonas sp.	0	0	1	0	0	0	0	0	0	0
Porphyromonas sp. COT-290 OH860	0	0	1	0	0	0	0	0	0	0
Porphyromonas sp. oral taxon 278	0	0	1	0	0	0	0	0	0	0
Prevotella albensis	0	0	1	0	0	0	0	0	0	0
Prevotella aurantiaca	0	0	1	0	0	0	0	0	0	0
Prevotella fusca	0	0	1	0	0	0	0	0	0	0
Prevotella loescheii	0	0	1	0	0	0	0	0	0	0
Prevotella marshii	0	0	1	0	0	0	0	0	0	0
Prevotella nanceiensis	0	0	1	0	0	0	0	0	0	0
Prevotella sp. BCRC 81118	0	0	1	0	0	0	0	0	0	0
Prevotella sp. CAG:1320	0	0	1	0	0	0	0	0	0	0
Propionibacteriaceae bacterium	0	0	1	0	0	0	0	0	0	0
Prosthecobacter debontii	0	0	1	0	1	0	0	0	0	0
Prosthecochloris marina	0	0	1	0	0	0	0	0	0	0
Proteobacteria bacterium HN_bin10	0	0	1	0	0	0	0	0	0	0
Proteobacteria bacterium SG_bin9	0	0	1	0	0	0	0	0	0	0
Pseudacidovorax intermedius	0	0	1	0	1	0	0	1	0	0
Pseudaminobacter manganicus	0	0	1	0	1	0	0	0	0	0
Pseudarthrobacter phenanthrenivorans	0	0	1	0	0	0	0	0	0	0
Pseudoalteromonas sp. BSi20480	0	0	1	0	0	0	0	0	0	0
Pseudoalteromonas sp. S3260	0	0	1	0	0	0	0	0	0	0
Pseudoclavibacter faecalis	0	0	1	0	1	0	0	0	0	0
Pseudoclavibacter sp. AY1H1	0	0	1	0	0	0	0	0	0	0
Pseudoflavitalea rhizosphaerae	0	0	1	0	0	0	0	0	1	0
Pseudomonadales bacterium RIFCSPLOWO2_12_59_9	0	0	1	0	0	0	0	0	0	0
Pseudomonas abietaniphila	0	0	1	0	1	0	0	0	0	0
Pseudomonas anguilliseptica	0	0	1	0	1	0	0	0	0	0
Pseudomonas argentinensis	0	0	1	0	0	0	0	0	0	0
Pseudomonas cannabina	0	0	1	0	0	0	0	0	0	0
Pseudomonas costantinii	0	0	1	0	0	0	0	0	0	0
Pseudomonas fragi	0	0	1	0	1	0	0	0	0	0
Pseudomonas fuscovaginae	0	0	1	0	1	0	0	0	0	0
Pseudomonas guineae	0	0	1	0	1	0	0	0	0	0
Pseudomonas kairouanensis	0	0	1	0	0	0	0	0	0	0
Pseudomonas knackmussii	0	0	1	0	1	0	0	0	0	0
Pseudomonas mendocina	0	0	1	0	1	0	0	0	0	0
Pseudomonas moorei	0	0	1	0	0	0	0	0	0	0
Pseudomonas oleovorans	0	0	1	0	1	0	0	1	0	0
Pseudomonas orientalis	0	0	1	0	0	0	0	1	0	0
Pseudomonas otitidis	0	0	1	0	0	0	0	0	0	0
Pseudomonas peli	0	0	1	0	1	0	0	0	0	0
Pseudomonas psychrotolerans	0	0	1	0	1	0	0	0	0	0
Pseudomonas rhodesiae	0	0	1	0	1	0	0	0	0	0
Pseudomonas sabulinigri	0	0	1	0	1	0	0	0	0	0
Pseudomonas sp. 35 E 8	0	0	1	0	0	0	0	0	0	0
Pseudomonas sp. 382	0	0	1	0	0	0	0	0	0	0
Pseudomonas sp. BJP69	0	0	1	0	1	0	0	0	0	0
Pseudomonas sp. FW305-130	0	0	1	0	0	0	0	0	0	0
Pseudomonas sp. GM60	0	0	1	0	0	0	0	0	0	0
Pseudomonas sp. H9	0	0	1	0	0	0	0	0	0	0
Pseudomonas sp. Irchel 3E13	0	0	1	0	0	0	0	0	0	0
Pseudomonas sp. K35	0	0	1	0	0	0	0	0	0	0
Pseudomonas sp. LAIL14HWK12:I12	0	0	1	0	0	0	0	0	0	0
Pseudomonas sp. MB-090624	0	0	1	0	0	0	0	0	0	0
Pseudomonas sp. NBRC 111123	0	0	1	0	0	0	0	0	0	0
Pseudomonas sp. NBRC 111124	0	0	1	0	0	0	0	0	0	0
Pseudomonas sp. SLBN-26	0	0	1	0	1	0	0	0	0	0
Pseudomonas sp. StFLB209	0	0	1	0	0	0	0	0	0	0
Pseudomonas syringae group genomosp. 7	0	0	1	0	0	0	0	0	0	0
Pseudomonas thivervalensis	0	0	1	0	1	0	0	0	0	0
Pseudomonas tremae	0	0	1	0	0	0	0	0	0	0
Pseudomonas viridiflava	0	0	1	0	1	0	0	0	0	0
Pseudonocardia sp. MH-G8	0	0	1	0	0	0	0	0	0	0
Pseudonocardiaceae bacterium YIM PH 21723	0	0	1	0	0	0	0	0	0	0
Pseudopedobacter saltans	0	0	1	0	1	0	0	0	0	0
Pseudorhodoferax sp. Leaf265	0	0	1	0	1	0	0	0	0	0
Pseudorhodoferax sp. Leaf267	0	0	1	0	1	0	0	0	0	0
Pseudorhodoplanes sinuspersici	0	0	1	0	0	0	0	0	0	0
Pseudoruminoccoccus massiliensis	0	0	1	0	1	0	0	0	0	0
Psychrobacter sp. C 20.9	0	0	1	0	0	0	0	0	0	0
Pustulibacterium marinum	0	0	1	0	1	0	0	0	0	0
Rahnella sp. AA	0	0	1	0	0	0	0	0	0	0
Ralstonia sp. GV074	0	0	1	0	0	0	0	0	0	0
Ramlibacter rhizophilus	0	0	1	0	0	0	0	0	0	0
Rheinheimera aquimaris	0	0	1	0	0	0	0	0	0	0
Rheinheimera nanhaiensis	0	0	1	0	0	0	0	0	0	0
Rheinheimera pacifica	0	0	1	0	0	0	0	0	0	0
Rheinheimera riviphila	0	0	1	0	0	0	0	0	0	0
Rheinheimera sp.	0	0	1	0	0	0	0	0	0	0
Rheinheimera sp. A13L	0	0	1	0	0	0	0	0	0	0
Rheinheimera sp. F8	0	0	1	0	0	0	0	0	0	0
Rheinheimera sp. KL1	0	0	1	0	0	0	0	0	0	0
Rheinheimera sp. LHK132	0	0	1	0	0	0	0	0	0	0
Rheinheimera sp. YQF-1	0	0	1	0	1	0	0	0	0	0
Rhizobacter sp. OV335	0	0	1	0	1	0	0	0	0	0
Rhizobium deserti	0	0	1	0	0	0	0	0	0	0
Rhizobium marinum	0	0	1	0	0	0	0	0	0	0
Rhizobium mongolense	0	0	1	0	1	0	0	0	0	0
Rhizobium pusense	0	0	1	0	1	0	0	1	0	0
Rhizobium sp. 2MFCol3.1	0	0	1	0	1	0	0	0	0	0
Rhizobium sp. PP-CC-2G-626	0	0	1	0	1	0	0	0	0	0
Rhizobium sp. Root149	0	0	1	0	0	0	0	0	0	0
Rhizobium sp. Td3	0	0	1	0	0	0	0	0	0	0
Rhizobium sp. YR295	0	0	1	0	1	0	0	0	0	0
Rhizobium subbaraonis	0	0	1	0	1	0	0	0	0	0
Rhizobium tumorigenes	0	0	1	0	0	0	0	0	0	0
Rhodanobacter denitrificans	0	0	1	0	0	0	0	0	0	0
Rhodanobacter sp. SCN 69-32	0	0	1	0	0	0	0	0	0	0
Rhodobacteraceae bacterium GWE1_64_9	0	0	1	0	0	0	0	0	0	0
Rhodococcus phenolicus	0	0	1	0	0	0	0	0	0	0
Rhodococcus sp. Leaf233	0	0	1	0	0	0	0	0	0	0
Rhodocyclaceae bacterium SHINM1	0	0	1	0	1	0	0	0	0	0
Rhodocyclales bacterium GT-UBC	0	0	1	0	1	0	0	0	0	0
Rhodocyclales bacterium GWA2_65_20	0	0	1	0	1	0	0	0	0	0
Rhodoferax koreense	0	0	1	0	1	0	0	0	0	0
Rhodopirellula sp. SM50	0	0	1	0	0	0	0	0	0	0
Rhodopseudomonas palustris	0	0	1	0	1	0	0	1	0	0
Rickettsiaceae bacterium	0	0	1	0	1	0	0	0	0	0
Riemerella sp.	0	0	1	0	0	0	0	0	0	0
Rodentibacter sp. Ppn85	0	0	1	0	0	0	0	0	0	0
Roseateles sp. YR242	0	0	1	0	1	0	0	0	0	0
Roseburia hominis	0	0	1	0	1	0	0	0	0	0
Roseburia sp. 1XD42-69	0	0	1	0	1	0	0	0	0	0
Roseburia sp. CAG:197	0	0	1	0	1	0	0	0	0	0
Roseburia sp. CAG:197_41_10	0	0	1	0	0	0	0	0	0	0
Roseospirillum parvum	0	0	1	0	1	0	0	0	0	0
Rubellimicrobium roseum	0	0	1	0	1	0	0	0	0	0
Rubrivirga sp. SAORIC476	0	0	1	0	1	0	0	0	0	0
Rubrivivax gelatinosus	0	0	1	0	1	0	0	0	0	0
Ruegeria profundi	0	0	1	0	0	0	0	0	0	0
Ruminococcus flavefaciens	0	0	1	0	1	0	0	0	0	0
Ruminococcus sp. 1xD21-23	0	0	1	0	0	0	0	0	0	0
Ruminococcus sp. AF25-23LB	0	0	1	0	0	0	0	0	0	0
Ruminococcus sp. AM29-12LB	0	0	1	0	0	0	0	0	0	0
Ruminococcus sp. AM43-6	0	0	1	0	0	0	0	0	0	0
Ruminococcus sp. TF11-2AC	0	0	1	0	0	0	0	0	0	0
Saccharothrix variisporea	0	0	1	0	1	0	0	0	0	0
Salinibacterium sp. PAMC 21357	0	0	1	0	0	0	0	1	0	0
Salinibacterium sp. S1194	0	0	1	0	0	0	0	1	0	0
Salinicoccus sp. YB14-2	0	0	1	0	0	0	0	0	0	0
Salinicola sp. MIT1003	0	0	1	0	0	0	0	0	0	0
Salinispora pacifica	0	0	1	0	1	0	0	0	0	0
Salinivirgaceae bacterium	0	0	1	0	1	0	0	0	0	0
Salipaludibacillus neizhouensis	0	0	1	0	0	0	0	0	0	0
Salipiger marinus	0	0	1	0	0	0	0	0	0	0
Salmonella bongori	0	0	1	0	0	0	0	0	0	0
Salmonella enterica	0	0	1	0	1	0	1	0	0	0
Sandarakinorhabdus limnophila	0	0	1	0	0	0	0	0	0	0
Sanguibacter marinus	0	0	1	0	0	0	0	0	0	0
Saprospirales bacterium	0	0	1	0	1	0	0	0	0	0
Schaalia odontolytica	0	0	1	0	1	0	0	0	0	0
[truncated: 9,431 more rows]
